# Supplementary material
Source: Research Square preprint supplement (doi:10.21203/rs.3.rs-8888940/v1)
Supplement: Supplementary file 1 [file 5ffc80025327b0ffce08e7e4.xlsx]

## Sheet: Sheet1
stock	year	IND	DID1	TIME2	City	Transfer	did	ESG_ave	ESG	esg	E评级	E得分	S评级	S得分	G评级	G得分	FC	KZ	SA	WW	SGR	Occupy	employee	struc	Market	ProvinceGreen	pgdp	finance	RD	Size	Lev	ROA	ROE	ATO	Cashflow	INV	FIXED	Growth	Board	Indep	Dual	Top5	TobinQ	SOE	FirmAge	INST	Mshare	Mfee	经营风险
2	2009	K	0	0	深圳市	0	0	5.5	6	80.3	3	69.23	6	81.92	6	82.41	0.047741	2.94179	-3.7003	-1.16895	0.142405	0.0565794	9.77656	0.930005	9.244	0	11.4379	3.48536	0.009652	25.6477	0.670017	0.050069	0.152683	0.380626	0.067244	0.654649	0.00985387	0.192459	2.30259	0.3	0	0.193179	1.51116	1	3.09104	0.304737	0.2441	0.0294999	0.0014655
2	2010	K	0	0	深圳市	0	0	6	6	83.93	4	70.8	8	91.05	6	81.53	0.051368	1.76578	-3.6056	-1.18017	0.165224	0.0692751	10.0367	0.90881	9.835	0.0341	11.5795	3.54004	0.0104203	26.0969	0.746861	0.050048	0.176802	0.28713	0.0103751	0.618322	0.0056557	0.037496	2.3979	0.3636	0	0.188461	1.16539	1	3.13549	0.374916	0.2348	0.0364076	0.0025388
2	2011	K	0	0	深圳市	0	0	6	6	81.81	3	67.21	8	92.72	5	76.29	0.017286	4.53909	-3.53993	-1.21811	0.176376	0.0622555	10.2382	0.931098	9.888	0.0154	11.6121	3.34599	0.0061263	26.4143	0.770997	0.045325	0.189507	0.280486	0.0114427	0.703341	0.00538763	0.415447	2.3979	0.3636	0	0.194724	1.04268	1	3.17805	0.38964	0.2209	0.0359169	0.0067729
2	2012	K	0	0	深圳市	0	0	6	6	84.27	3	65.41	8	91.88	6	83.28	0.009238	4.44238	-3.49211	-1.22077	0.19989	0.052951	10.3424	0.985526	9.936	0.0468	11.7219	3.3371	0.00610993	26.6603	0.783163	0.046407	0.208875	0.305525	0.00983617	0.673609	0.0042562	0.436505	2.3979	0.3636	0	0.193658	1.07689	1	3.21888	0.462739	0.2142	0.0269629	0.0092852
2	2013	K	0	0	深圳市	0	0	6	6	83.46	4	70.8	8	93.64	5	77.99	0.017444	3.09918	-3.44329	-1.2272	0.150356	0.0726522	10.4725	1.03207	10.237	0.0194	11.7297	3.42302	0.00917099	26.8954	0.77997	0.042651	0.195093	0.315659	0.00401471	0.691005	0.00444437	0.313263	2.3979	0.3636	0	0.187696	0.968694	1	3.2581	0.36233	0.2884	0.0221745	0.0166014
2	2014	K	0	0	深圳市	0	0	6	6	83.41	2	63.61	8	92.3	6	81.53	0.017497	1.81631	-3.46019	-1.24177	0.134823	0.0962306	10.6127	1.03989	10.445	0.0314	11.915	3.44766	0.00591183	26.9546	0.772046	0.039059	0.174285	0.296448	0.0820694	0.624943	0.00454035	0.081002	2.3979	0.3636	0	0.335616	1.06491	1	3.29584	0.49166	0.1815	0.0266594	0.0106012
2	2015	K	0	0	深圳市	0	0	6.25	6	84.7	3	67.21	8	92.3	6	83.28	0.008562	2.15178	-3.42631	-1.21346	0.152068	0.123485	10.6524	1.10955	11.076	0.0448	11.9703	5.15504	0.0122448	27.1388	0.777015	0.046351	0.205782	0.349287	0.0262492	0.6022	0.00804436	0.335828	2.3979	0.3636	0	0.42804	1.19235	1	3.3322	0.582096	0.1912	0.0242663	0.0163154
2	2016	K	0	1	深圳市	0	0	5.75	6	80.14	2	62.03	7	87.79	5	78.88	0.003983	2.06577	-3.33691	-1.24963	0.138189	0.126927	10.973	1.2159	10.49	0.0818	12.0282	4.85968	0.0207014	27.4455	0.805367	0.039322	0.190279	0.33354	0.0476313	0.562629	0.00819911	0.229754	2.3979	0.3636	0	0.444522	1.06901	1	3.3673	0.586376	0.1816	0.0282794	0.0061937
2	2017	K	0	1	深圳市	0	0	6	6	83.49	2	64.51	8	93.13	6	80.61	0.003239	1.97615	-3.22465	-1.2818	0.171098	0.140087	11.2607	1.28451	10.61	0.0391	12.1202	4.69248	0.0156436	27.784	0.839813	0.037283	0.213626	0.243381	0.0706423	0.513227	0.00609158	0.010063	2.3979	0.3636	1	0.569841	1.11796	1	3.4012	0.71902	0.109	0.0364999	0.0050638
2	2018	K	0	1	深圳市	0	0	6.25	6	83.74	3	69.91	8	92.47	6	80.02	0.001969	3.00844	-3.13552	-1.28275	0.190691	0.159837	11.555	1.32152	10.854	0.0519	12.1525	4.8295	0.0229123	28.0554	0.845856	0.03658	0.233355	0.221	0.0219931	0.49085	0.00754544	0.225537	2.3979	0.3636	0	0.601533	1.01574	1	3.43399	0.783854	0.109	0.0347381	0.014418
2	2019	K	0	1	深圳市	0	0	6.5	7	85.66	2	64.51	8	94.06	6	84.68	0.008703	3.592	-3.11452	-1.29017	0.192306	0.136112	11.7868	1.38968	11.342	0.0787	12.2234	5.034	0.0203671	28.1791	0.843589	0.033839	0.217825	0.225805	0.0264096	0.518529	0.00716783	0.235873	2.30259	0.4	0	0.545858	1.04627	1	3.46574	0.740112	0.1065	0.02995	0.0137357
2	2020	K	0	1	深圳市	0	0	7	7	86.21	2	64.51	8	94.06	7	85.93	0.009895	3.54081	-3.11569	-1.29957	0.146773	0.13348	11.8534	1.42588	11.673	0.0643	11.9786	5.71698	0.012166	28.2565	0.812835	0.032952	0.191154	0.232898	0.0284553	0.536098	0.00672881	0.139219	2.3979	0.3636	0	0.543844	0.992654	1	3.49651	0.691104	0.0762	0.0245473	0.0113891
2	2021	K	0	1	深圳市	0	0	6.25	6	83.9	7	88.66	6	83.16	6	80.73	0.017029	3.94587	-3.1372	-1.3008	0.0729997	0.137241	11.8458	1.36837	12.014	0.0511	12.0649	5.91092	0.0124654	28.293	0.797398	0.019995	0.102528	0.237825	0.00212168	0.554831	0.00661344	0.080375	2.3979	0.3636	0	0.525463	0.929695	1	3.52636	0.673737	0.0762	0.02262	0.009783
2	2022	K	0	1	深圳市	0	0	6.75	7	85.55	7	86.64	7	85.6	6	84.65	0.003489	4.41962	-3.22674	-1.30974	0.0789721	0.155194	11.7892	1.35959	12.364	0.0329	12.1187	6.1461	0.0141639	28.1947	0.769515	0.020321	0.09414	0.272657	0.00156532	0.516218	0.00934499	0.112723	2.3979	0.3636	0	0.533635	0.908089	1	3.55535	0.693348	0.0863	0.0190223
2	2023	K	0	1	深圳市	0	0	6.25	6	83.78	7	86.37	5	77.11	7	86.77	0.021787	4.4806	-3.34314	-1.22584	0.0534821	0.169346	11.7837	1.3905	12.725	0.0663	12.1819	6.30369	0.0131461	28.0397	0.732246	0.012539	0.050597	0.285497	0.00259981	0.46629	0.0127807	-0.075618	2.3979	0.3636	0	0.528797	0.849467	1	3.58352	0.626809	0.0811	0.0123824
4	2011	C	0	0	深圳市	0.00122581	0	3	3	69.02	1	54.24	2	64.63	5	79.53	0.719867	3.72067	-3.6925	-0.797923	0.071145	0.0232211	5.77455	0.931098	9.888	0.0154	11.6121	3.34599	0.0061263	19.0952	0.294935	0.048318	0.068701	0.391582	0.0986502	0.213392	0.186543	-0.432705	2.07944	0.375	0	0.392662	3.75237	0	3.2581	0.3664	0.0027	0.254931	0.0169195
4	2012	C	0	0	深圳市	0.00034999	0	4	4	71.15	1	52.45	4	72.54	5	79.77	0.793755	3.63063	-3.72755	-0.851509	0.0557194	0.0146227	5.62402	0.985526	9.936	0.0468	11.7219	3.3371	0.00610993	19.0778	0.232528	0.040153	0.054556	0.500299	0.0910393	0.254905	0.241166	0.306825	2.19722	0.3333	0	0.354702	3.78997	0	3.29584	0.3183	0.0027	0.175151	0.0085341
4	2013	C	0	0	深圳市	0	0	3.75	4	70.68	1	52.45	2	61.64	7	86.09	0.806175	4.66223	-3.82999	-0.815492	0.0417907	0.111238	5.49306	1.03207	10.237	0.0194	11.7297	3.42302	0.00917099	19.3051	0.403239	0.026648	0.039627	0.334591	-0.0868971	0.337998	0.16966	-0.252444	2.19722	0.3333	0	0.366834	4.43923	0	3.3322	0.356	0.0027	0.230518	0.0105602
4	2014	C	1	0	深圳市	0	0	3	3	65.7	1	50.87	1	53.04	6	81.82	0.837118	4.05667	-3.95374	-0.85435	0.11022	0.0551003	5.39363	1.03989	10.445	0.0314	11.915	3.44766	0.00591183	19.6394	0.534754	0.053838	0.103513	0.277753	-0.0163593	0.573807	0.111804	0.107499	2.19722	0.3333	0	0.321234	4.39582	0	3.3673	0.361328	0.0027	0.181052	0.108843
4	2015	C	1	0	深圳市	0	0	2.75	3	66.18	1	52.66	1	58.1	5	78.54	0.584054	4.37278	-4.03137	-0.886292	0.0438325	0.041277	5.33754	1.10955	11.076	0.0448	11.9703	5.15504	0.0122448	19.8037	0.590402	0.018609	0.042766	0.326897	0.0232317	0.626015	0.094771	0.494308	2.19722	0.3333	1	0.473963	10.1469	0	3.4012	0.528885	1.4533	0.152139	0.109196
4	2016	C	1	1	深圳市	0	0	2.5	2	62.06	1	50.87	2	63.13	3	67.06	0.424922	2.07878	-3.92875	-0.933655	0.286795	0.107859	5.18739	1.2159	10.49	0.0818	12.0282	4.85968	0.0207014	19.2259	0.203456	0.127625	0.232602	0.924405	0.661238	0.0307956	0.149588	1.38821	2.19722	0.3333	1	0.48604	16.8639	0	3.43399	0.510811	1.4505	0.0949987	0.131961
4	2017	C	1	1	深圳市	0	0	2.5	3	66.38	1	49.98	2	60.78	5	78.53	0.727673	2.92347	-4.01722	-0.803387	0.0330656	0.0396174	5.14749	1.28451	10.61	0.0391	12.1202	4.69248	0.0156436	19.4096	0.315247	0.023925	0.032528	0.562797	0.0537095	0.0551913	0.11613	-0.518178	2.19722	0.3333	1	0.483512	7.22984	0	3.46574	0.511561	1.4505	0.107336	0.0585711
4	2018	C	1	1	深圳市	0	0	2	1	58.76	1	49.98	1	57.74	2	63.92	0.893268	7.72982	-4.12252	-0.891545	#N/A	0.00262793	5.34711	1.32152	10.854	0.0519	12.1525	4.8295	0.0229123	19.6768	0.477966	-0.069716	-0.117646	1.18341	-0.151804		0.00281982	1.64685	2.19722	0.3333	1	0.487658	4.27007	0	3.49651	0.456327	1.5769	0.0510239	0.0691744
4	2019	C	1	1	深圳市	0.0681831	0	1.25	2	61.07	1	48.19	2	64.8	3	65.13	0.796934	-0.793136	-4.40967	-0.896745	#N/A	0.0315413	5.52545	1.38968	11.342	0.0787	12.2234	5.034	0.0203671	21.1251	0.0602434	-0.003905	-0.00454	0.117298	-0.0106196		0.00149203	-0.704944	2.19722	0.3333	1	0.453555	1.32938	0	3.52636	0.441	0.0096	0.182988	0.27417
4	2020	I	1	1	深圳市	1	0	2.5	3	69.57	1	50.21	5	75.88	5	76.58	0.801227	0.605999	-4.45448	-0.986351	0.0444427	0.009579	5.57595	1.42588	11.673	0.0643	11.9786	5.71698	0.012166	21.1702	0.0682637	0.040542	0.04333	0.18347	0.00254158	0.00314101	0.00127412	1.59159	2.07944	0.375	1	0.480455	1.63727	0	3.55535	0.474332	0.0001	0.0620863	0.530545
4	2021	I	1	1	深圳市	1	0	3.75	4	74.59	1	56.14	4	72.97	6	81.49	0.694114	1.47121	-4.4537	-0.787174	#N/A	0.01019	5.73334	1.36837	12.014	0.0511	12.0649	5.91092	0.0124654	20.8281	0.146164	-0.380366	-0.422918	0.216103	0.00279274	0.0185528	0.00220337	0.02999	2.19722	0.3333	1	0.444655	2.39752	0	3.58352	0.437085	0.0001	0.0702025	0.357639
4	2023	I	1	1	深圳市	1	0	3	3	67.5	1	56.14	4	72.86	3	66.68	0.862696	8.11396	-4.3594	-0.847104	#N/A	0.0632701	5.69709	1.3905	12.725	0.0663	12.1819	6.30369	0.0131461	19.84	0.531094	-0.323428	-0.586055	0.222279	-0.0871955	0.00280501	0.00385727	-0.338902	1.60944	0.4	1	0.329842	5.47958	0	3.63759	0.315814	0.001	0.290858
5	2009	S	0	0	深圳市	0	0	3	3	67	1	56.79	1	56.17	5	79.55	0.39663	6.47061	-3.95548	-0.907222	#N/A	0.0713002	6.56808	0.930005	9.244	0	11.4379	3.48536	0.009652	21.0003	0.467575	-0.036127	-0.067274	0.031897	0.00616403	0.0287295	0.0655607	-0.602719	2.70805	0.3333	0	0.255296	4.63766	0	2.99573	0.262876	0	1.17996	0.0681099
5	2010	S	0	0	深圳市	0	0	2.25	2	64.25	1	59.78	1	56.17	4	72.32	0.593988	3.42641	-3.99313	-0.938761	#N/A	0.0920295	6.50877	0.90881	9.835	0.0341	11.5795	3.54004	0.0104203	20.9807	0.47796	-0.003388	-0.006426	0.105047	0.00473576	0.0416979	0.0601467	2.17727	2.70805	0.3333	0	0.26484	3.07061	0	3.04452	0.27153	0	0.222055	0.0697709
5	2012	K	0	0	深圳市	0	0	2.75	3	67.32	1	55.11	2	62.71	5	75.91	0.36117	4.18297	-4.07552	-0.92772	0.0333621	0.126777	5.94542	0.985526	9.936	0.0468	11.7219	3.3371	0.00610993	21.0007	0.483142	0.017069	0.032818	0.077062	0.135996	0.0115112	0.0182305	0.56483	2.70805	0.3333	0	0.277278	2.53986	0	3.13549	0.2536	0	0.419088	0.0535703
5	2013	K	0	0	深圳市	0	0	2.25	2	63.37	1	55.11	1	51.52	5	75.91	0.421611	4.70675	-4.1026	-0.866608	#N/A	0.158342	5.92959	1.03207	10.237	0.0194	11.7297	3.42302	0.00917099	20.8961	0.474831	-0.033763	-0.064829	0.041511	-0.0939871	0.0129422	0.0208482	-0.476352	2.70805	0.3333	0	0.280148	2.39697	0	3.17805	0.254	0	0.650743	0.0520774
5	2014	K	0	0	深圳市	0	0	2	2	63.34	1	53.95	1	54.62	4	73.94	0.55212	3.84052	-4.15963	-0.910038	0.0688906	0.116369	6.04263	1.03989	10.445	0.0314	11.915	3.44766	0.00591183	21.0356	0.509964	0.033784	0.066716	0.041308	-0.00671544	0.0112574	0.018967	0.013739	2.70805	0.3333	0	0.254571	3.25151	0	3.21888	0.2489	0	0.73912	0.0317946
5	2015	K	0	0	深圳市	0.0115566	0	2.75	3	66.77	1	58.62	1	59.28	5	75.91	0.481972	2.51637	-4.24494	-0.912422	#N/A	0.0995796	6.28227	1.10955	11.076	0.0448	11.9703	5.15504	0.0122448	21.509	0.44704	-0.030349	-0.057392	0.047253	0.00719907	0.140226	0.0169786	0.593989	2.70805	0.3333	0	0.264764	4.70405	0	3.2581	0.264807	0	0.674481	0.0196857
5	2016	N	0	1	深圳市	0.0101853	0	3	3	65.25	1	59.26	1	59.28	4	72.32	0.574612	3.82455	-4.29474	-1.08888	0.0944482	0.10457	6.42649	1.2159	10.49	0.0818	12.0282	4.85968	0.0207014	21.6504	0.463708	0.049547	0.091073	0.204126	-0.073544	0.16539	0.0148728	4.72788	2.70805	0.3333	0	0.269004	2.9812	0	3.29584	0.282324	0	0.192108	0.017727
5	2017	N	0	1	深圳市	0.00983131	0	3	3	66.95	1	57.58	1	59.28	5	76.72	0.584283	4.6731	-4.34283	-0.918422	0.016603	0.153826	6.5582	1.28451	10.61	0.0391	12.1202	4.69248	0.0156436	21.7921	0.517747	0.008433	0.016622	0.195216	-0.0835491	0.142898	0.0112932	0.101811	2.70805	0.3333	0	0.269124	1.91895	0	3.3322	0.271914	0	0.198412	0.0159997
5	2018	N	0	1	深圳市	0.00436455	0	2.5	2	63.94	1	54.06	1	59.28	4	71.6	0.63499	4.07759	-4.38617	-0.940784	0.110187	0.252847	6.61338	1.32152	10.854	0.0519	12.1525	4.8295	0.0229123	21.8616	0.49404	0.051959	0.105071	0.16116	-0.0303691	0.153449	0.00901138	-0.084271	2.63906	0.3571	0	0.268069	1.36204	0	3.3673	0.241705	0	0.173524	0.116005
5	2019	N	0	1	深圳市	0.00547017	0	2.75	3	67.95	1	54.06	3	67.52	4	74.03	0.699902	2.93574	-4.42482	-0.944046	0.114145	0.1403	6.52209	1.38968	11.342	0.0787	12.2234	5.034	0.0203671	21.8324	0.425337	0.058018	0.107477	0.179615	0.00405193	0.147597	0.0101617	0.136632	2.48491	0.4167	0	0.266054	1.5039	0	3.4012	0.244563	0	0.178732	0.132544
5	2020	N	0	1	深圳市	0.00564297	0	3	3	65.29	1	52.9	2	64.26	4	71.2	0.574233	2.41363	-4.45281	-0.932449	#N/A	0.15603	6.44413	1.42588	11.673	0.0643	11.9786	5.71698	0.012166	21.6205	0.459425	-0.140834	-0.251752	0.145469	0.0474453	0.00554168	0.0115225	-0.278113	2.63906	0.3571	0	0.207572	1.55097	0	3.43399	0.1872	0	0.152341	0.124882
6	2009	K	0	0	深圳市	0	0	5.5	5	77.53	3	69.01	7	85.68	4	72.63	0.3585	3.37137	-3.9535	-1.05284	0.143075	0.000946111	5.52146	0.930005	9.244	0	11.4379	3.48536	0.009652	22.7073	0.698577	0.050816	0.173258	0.280326	0.0507463	0.744714	0.00140314	0.809881	2.19722	0.3333	0	0.2922	1.47542	1	3.04452	0.371582	2.3973	0.033777	0.0141931
6	2010	K	0	0	深圳市	0	0	5.5	5	77.84	3	67.21	7	86.1	4	73.52	0.43959	0.996832	-3.9878	-1.05436	0.213911	0.00130881	6.58755	0.90881	9.835	0.0341	11.5795	3.54004	0.0104203	22.8713	0.701421	0.062684	0.209026	0.295289	0.126842	0.68585	0.000867145	0.264703	2.19722	0.3333	0	0.406457	1.31192	1	3.09104	0.401208	2.2446	0.0297195	0.0095892
6	2011	K	0	0	深圳市	0	0	5.75	6	82.85	3	65.41	8	90.86	6	81.02	0.241966	3.16164	-4.02898	-1.06322	0.158179	0.00348277	5.64545	0.931098	9.888	0.0154	11.6121	3.34599	0.0061263	22.8422	0.652855	0.051404	0.159389	0.3066	0.144024	0.749757	0.000836729	0.107127	2.19722	0.3333	0	0.407383	1.13711	1	3.13549	0.435543	1.8009	0.0285315	0.010248
6	2012	K	0	0	深圳市	0	0	6	6	80.72	3	65.41	7	86.68	6	80.13	0.24912	0.253327	-4.06386	-1.06882	0.16437	0.00222851	5.66988	0.985526	9.936	0.0468	11.7219	3.3371	0.00610993	22.9579	0.620165	0.071277	0.195581	0.348279	0.233491	0.616948	0.000576978	0.188072	2.19722	0.3333	0	0.433425	1.29655	1	3.17805	0.509419	1.3798	0.0202522	0.0060496
6	2013	K	0	0	深圳市	0	0	5.5	6	80.09	2	62.03	6	83.51	6	82.8	0.333126	2.30348	-4.10049	-1.05126	0.132163	0.00218144	5.69036	1.03207	10.237	0.0194	11.7297	3.42302	0.00917099	23.0227	0.579972	0.072289	0.18046	0.477522	-0.0893136	0.552922	0.000541425	0.498858	2.19722	0.3333	0	0.471863	1.24549	1	3.21888	0.551206	1.0961	0.0156416	0.0044674
6	2014	K	0	0	深圳市	0	0	6	6	81.06	2	62.03	7	85.85	6	82.8	0.283133	3.18066	-4.13029	-1.03799	0.0914594	0.0041039	5.79606	1.03989	10.445	0.0314	11.915	3.44766	0.00591183	23.1874	0.64142	0.046967	0.121993	0.213432	-0.0934173	0.579702	0.000356184	-0.494946	2.19722	0.3333	0	0.399162	1.44749	1	3.2581	0.368564	0.8403	0.0274456	0.0051408
6	2015	K	0	0	深圳市	0	0	5.25	5	79.01	1	53.09	6	83.49	6	83.33	0.277202	2.28623	-4.16467	-1.04192	0.0656154	0.00707828	5.86363	1.10955	11.076	0.0448	11.9703	5.15504	0.0122448	23.2651	0.646151	0.035883	0.100759	0.298839	-0.0239038	0.661709	0.000265633	0.569229	2.07944	0.375	0	0.392738	1.86305	1	3.29584	0.401352	0.4784	0.0176868	0.0042888
6	2016	K	0	1	深圳市	0	0	5.75	6	81.37	1	57.3	7	86.77	6	84.19	0.301605	0.240082	-4.20188	-1.06048	0.122758	0.00839274	5.9135	1.2159	10.49	0.0818	12.0282	4.85968	0.0207014	23.3012	0.610499	0.062138	0.167039	0.259631	0.129717	0.58466	0.000215733	-0.080859	2.07944	0.375	0	0.391163	1.57695	1	3.3322	0.393283	0.3991	0.0204855	0.0055292
6	2018	K	0	1	深圳市	0	0	6	6	82.34	2	60	7	86.68	7	85.59	0.251309	-0.843324	-4.27969	-1.07004	0.115237	0.00579903	5.93225	1.32152	10.854	0.0519	12.1525	4.8295	0.0229123	23.3287	0.528236	0.069209	0.152665	0.188318	0.118691	0.475523	0.000493305	-0.151246	1.94591	0.4286	0	0.412685	1.04476	1	3.4012	0.41778	0	0.0530739	0.0150464
6	2019	K	0	1	深圳市	0	0	6	6	82.77	2	60	7	86.77	7	86.48	0.257155	1.0751	-4.30645	-1.08604	0.091556	0.00354518	5.95324	1.38968	11.342	0.0787	12.2234	5.034	0.0203671	23.4798	0.544612	0.057582	0.124379	0.254854	-0.0123374	0.50548	0.000834811	0.485494	1.94591	0.4286	0	0.416177	1.00417	1	3.43399	0.435418	0	0.0371345	0.0231143
6	2020	K	0	1	深圳市	0	0	6	6	83.39	1	56.75	7	86.43	7	89.28	0.297961	1.63916	-4.3483	-1.06989	0.0892681	0.00234153	5.98394	1.42588	11.673	0.0643	11.9786	5.71698	0.012166	23.4599	0.492185	0.057915	0.120319	0.188244	-0.0108525	0.505239	0.00285596	-0.213489	2.19722	0.3333	0	0.421811	0.982862	1	3.46574	0.411669	0	0.0436241	0.0243166
6	2021	K	0	1	深圳市	0	0	5.25	5	75.11	3	68.59	5	77.04	5	78.77	0.299122	4.49527	-4.3413	-1.08773	0.0500551	0.00254945	5.99894	1.36837	12.014	0.0511	12.0649	5.91092	0.0124654	23.8846	0.65322	0.028358	0.06909	0.158243	-0.164174	0.682908	0.00179988	0.052419	2.07944	0.375	0	0.400808	0.908335	1	3.49651	0.389511	0	0.0462838	0.0311747
6	2022	K	0	1	深圳市	0	0	4.25	4	73.32	3	67.94	5	75.43	5	75.95	0.148041	2.06867	-4.36632	-1.13358	0.0394122	0.00225486	6.05209	1.35959	12.364	0.0329	12.1187	6.1461	0.0141639	23.9966	0.679176	0.017922	0.053806	0.147992	0.0877102	0.638041	0.00205072	0.197905	1.94591	0.4286	0	0.396143	1.00135	1	3.52636	0.398088	0	0.0410008
6	2023	K	0	1	深圳市	0	0	4.75	5	79.07	4	73.49	7	87.05	5	77.42	0.249559	3.97713	-4.40884	-1.04046	#N/A	0.002077	6.03069	1.3905	12.725	0.0663	12.1819	6.30369	0.0131461	23.9782	0.712887	-0.034471	-0.113344	0.107443	0.00280731	0.657224	0.00159914	-0.240339	2.07944	0.375	0	0.394487	0.951956	1	3.55535	0.401122	0.0008	0.0605987
7	2012	H	0	0	深圳市	1	0	3	3	65.62	1	54.89	4	70.54	2	64.51	0.040171	7.57986	-4.16303	-0.893107	0.0151637	0.117728	6.63595	0.985526	9.936	0.0468	11.7219	3.3371	0.00610993	20.4871	0.624158	0.007696	0.015051	0.542776	-0.315841	0.0237247	0.107852	0.891048	2.19722	0.3333	0	0.401447	4.08606	0	3.21888	0.209491	10.9013	0.150384	0.0365896
7	2013	H	0	0	深圳市	1	0	3.75	4	71.92	3	65.02	6	83.32	2	63.4	0.445558	1.31091	-4.17169	-0.912041	0.0563088	0.050927	6.51323	1.03207	10.237	0.0194	11.7297	3.42302	0.00917099	20.304	0.462754	0.026024	0.057937	0.296227	0.293319	0.0274851	0.125219	-0.314446	2.07944	0.375	0	0.427358	4.47149	0	3.2581	0.2583	10.8693	0.208957	0.0235763
7	2014	H	0	0	深圳市	1	0	3	3	66.43	3	65.02	4	72.88	2	60.8	0.564906	3.96115	-4.2179	-0.897437	#N/A	0.0536539	6.40688	1.03989	10.445	0.0314	11.915	3.44766	0.00591183	20.339	0.474294	-0.049883	-0.093875	0.296014	0.0185023	0.0255276	0.112947	-0.075814	1.79176	0.5	0	0.375188	4.94589	0	3.29584	0.250275	0.0452	0.223239	0.0710361
7	2015	H	0	0	深圳市	1	0	2	2	60.59	2	63.44	4	72.88	1	48.02	0.811717	-1.30262	-4.19126	-0.864551	0.0368158	0.0452523	4.79579	1.10955	11.076	0.0448	11.9703	5.15504	0.0122448	19.9901	0.223847	0.0228	0.036231	0.170434	0.494131	0.0321198	0.149913	-0.500442	2.07944	0.375	0	0.357422	10.5003	0	3.3322	0.228512	0	0.39572	0.0994663
7	2016	H	0	1	深圳市	1	0	2	2	62.54	3	65.02	4	72.88	1	51.94	0.759969	3.47568	-4.24515	-0.774123	0.22934	0.0582605	5.04343	1.2159	10.49	0.0818	12.0282	4.85968	0.0207014	20.0584	0.149962	0.164	0.201385	0.078132	-0.0469642	0.0290209	0.134249	-0.607318	2.19722	0.3333	0	0.396506	10.5048	0	3.3673	0.2898	0.0647	1.27211	0.283358
7	2018	K	0	1	深圳市	0.911983	0	3.5	3	68.29	2	60.97	4	74.55	2	64.78	0.644665	8.36358	-4.33648	0	#N/A	0.329835	4.43082	1.32152	10.854	0.0519	12.1525	4.8295	0.0229123	20.1158	0.643431	-0.397414	-0.671167	0.085972	-0.0126199	0.000192728	0.122003	0.070624	2.19722	0.3333	0	0.39769	5.25349	0	3.43399	0.3655	0	0.685862	0.242442
7	2019	K	0	1	深圳市	0.900266	0	2.75	3	69.8	2	60.97	4	74.55	3	68.22	0.947867	7.25362	-4.37247	0	0.116642	0.335058	4.43082	1.38968	11.342	0.0787	12.2234	5.034	0.0203671	20.0953	0.601261	0.041226	0.109225	0.077932	-0.0595817	0.000253155	0.112571	-0.009966	1.60944	0.4	0	0.413763	6.14385	0	3.46574	0.333	0	0.61715	0.234019
7	2020	K	0	1	深圳市	0.878314	0	3	3	66.13	2	60.74	5	78.72	1	56	0.889052	7.2731	-4.33106	0	#N/A	0.504133	4.33073	1.42588	11.673	0.0643	11.9786	5.71698	0.012166	19.7137	0.813932	-0.274001	-0.876946	0.100539	-0.00921822	0.00390898	0.126842	0.074381	1.60944	0.4	0	0.404995	6.74352	0	3.49651	0.324833	0	0.491579	0.221149
7	2022	K	0	1	深圳市	1	0	2.75	3	65.61	3	65.5	4	72.44	2	60.55	0.189494	3.85214	-4.4045	-0.92094	#N/A	0.0514365	4.33073	1.35959	12.364	0.0329	12.1187	6.1461	0.0141639	19.6853	0.711224	-0.016099	-0.058507	0.561785	0.442786	0.0920176	0.130917	0.238229	1.60944	0.4	0	0.337509	7.52879	0	3.55535	0.326907	0	0.107866
8	2013	H	0	0	北京市	1	0	3	3	68.17	1	45.9	2	64.8	6	81.82	0.86073	-0.465053	-3.92298	-0.901081	0.0420796	0.00153698	7.39142	4.03198	9.282	0.1207	11.4426	6.25535	0.0120342	20.2559	0.100605	0.036693	0.041213	0.490865	0.10657	0.0154522	0.536794	-0.081551	1.94591	0.4286	0	0.669004	2.67932	1	3.21888	0.6623	0	0.276017	0.0480465
8	2014	H	0	0	北京市	0	0	3	3	66.36	1	47.48	1	57.74	6	81.82	0.789054	0.463995	-3.97611	-0.907548	0.0131505	0.000944904	7.16935	4.13578	9.212	0.1277	11.5129	6.23469	0.0132537	20.3288	0.112276	0.011942	0.013368	0.472349	0.101922	0.0128945	0.455509	0.008977	1.94591	0.4286	0	0.632008	5.39697	1	3.2581	0.577374		0.311002	0.0461246
8	2015	C	1	0	北京市	0.0322535	0	3	3	65.54	1	45.9	1	59.92	5	79.36	0.668132	-0.75852	-4.19162	-1.07766	0.0698667	0.0104697	7.86978	4.57462	9.192	0.1279	11.5759	7.43604	0.0125049	22.0012	0.189809	0.089088	0.108321	0.607535	-0.0201881	0.0860658	0.119261	3.216	1.94591	0.4286	0	0.475291	2.88737	1	3.29584	0.421495	12.7967	0.236315	0.0123635
8	2016	C	1	1	北京市	0.0247913	0	3.75	4	71.75	1	49.49	5	76.11	6	80.18	0.402869	0.278697	-4.22959	-1.06361	0.0886151	0.010135	7.55119	4.76782	9.171	0.1254	11.6801	7.37893	0.0111332	22.8265	0.246583	0.09006	0.116852	0.318453	-0.00685084	0.0712086	0.0223164	0.448569	1.94591	0.4286	0	0.297009	2.29995	1	3.3322	0.341211	8.9433	0.207211	0.0159608
8	2017	C	1	1	北京市	0.0244184	0	4	4	70.15	1	54.24	2	64.35	6	82.17	0.338821	1.81803	-4.25651	0	0.11629	0.00567276	7.79028	4.89399	9.236	0.1371	11.7675	7.18669	0.0129116	23.0915	0.326949	0.094283	0.13318	0.247039	-0.00495949	0.065573	0.0229524	0.242497	1.94591	0.4286	0	0.319365	2.16656	1	3.3673	0.448061	8.224	0.199996	0.0203461
8	2018	C	1	1	北京市	0.102571	0	3.75	4	71.78	1	54.24	5	76.11	5	77.81	0.187603	2.54732	-4.29772	-1.05717	0.0442942	0.00729634	7.87512	5.02215	9.239	0.1438	11.8509	7.50581	0.0140459	23.0714	0.29251	0.032338	0.04686	0.242605	-0.0564255	0.0661918	0.0294123	0.100376	2.19722	0.3333	0	0.475354	1.30841	1	3.4012	0.454654	7.3135	0.140752	0.0711393
8	2019	C	1	1	北京市	0.20763	0	3.75	4	72.59	1	58.86	4	73.76	5	78.81	0.290469	1.85652	-4.32858	-1.08419	0.0601117	0.014493	7.87017	5.23404	9.512	0.1348	12.009	6.72657	0.0122534	23.2119	0.370962	0.04064	0.061065	0.286096	0.000441634	0.0709968	0.0368488	0.255465	2.19722	0.3333	0	0.434457	1.19754	1	3.43399	0.427901	5.5356	0.136936	0.075687
8	2020	C	1	1	北京市	0.200355	0	4	4	70.38	1	52.67	4	72.5	5	78	0.212986	2.13158	-4.36393	-0.998475	#N/A	0.00917278	7.78072	5.24401	9.813	0.1321	12.013	7.26091	0.0113831	23.2749	0.480167	-0.071722	-0.125232	0.154186	0.0405384	0.084451	0.0351186	-0.404524	2.19722	0.3333	0	0.448635	1.02948	1	3.46574	0.427683	4.1319	0.184954	0.0237334
8	2021	C	1	1	北京市	0.178701	0	4.75	5	76.11	3	67.14	5	76.67	6	81.25	0.201686	2.71472	-4.4066	-1.00056	#N/A	0.00855345	7.71423	4.53988	10.123	0.1365	12.1226	6.90792	0.0111608	23.2393	0.568954	-0.109394	-0.229707	0.175724	0.0370591	0.0901855	0.0333342	0.155036	2.19722	0.3333	1	0.44857	1.2222	1	3.49651	0.416721	4.1381	0.142892	0.0267397
8	2022	C	1	1	北京市	0.161863	0	4.25	4	72.78	3	67.28	5	75.4	4	74.22	0.129165	3.41808	-4.45324	-1.00499	#N/A	0.00810293	7.75405	5.24349	10.444	0.14	12.1564	7.40053	0.0117446	23.1435	0.601696	-0.071702	-0.172624	0.150041	0.0509706	0.0937869	0.0387388	-0.199499	2.19722	0.3333	1	0.449971	1.16502	1	3.52636	0.418155	4.1381	0.191179
8	2023	C	1	1	北京市	0.0973122	0	4.25	5	79.43	5	75.11	6	80.2	6	81.52	0.263533	4.52939	-4.49664	-1.02364	#N/A	0.0178177	7.67786	5.68984	10.774	0.1442	12.2075	7.97605	0.0119263	23.0893	0.65704	-0.075282	-0.20271	0.229337	0.0029158	0.0748148	0.0481504	0.416647	2.19722	0.3333	1	0.442411	1.25482	1	3.55535	0.416424	0.0063	0.144302
9	2009	S	0	0	深圳市	0.00197648	0	4.75	5	78.94	2	60.58	6	80.99	7	86.11	0.31526	2.41544	-4.1926	-1.07387	0.141668	0.0733765	8.54636	0.930005	9.244	0	11.4379	3.48536	0.009652	22.7384	0.602092	0.06015	0.149136	0.481295	0.0846784	0.28357	0.120552	0.130402	2.07944	0.375	1	0.213043	2.08575	0	2.99573	0.444868	0.0254	0.0764901	0.0789869
9	2010	S	0	0	深圳市	0.00782811	0	4.25	4	74.27	1	55.27	5	76.98	6	81.31	0.37594	2.9083	-4.22018	-1.00268	0.127435	0.0276775	8.61178	0.90881	9.835	0.0341	11.5795	3.54004	0.0104203	23.0283	0.62953	0.050391	0.13184	0.367073	-0.0584907	0.416855	0.0858064	-0.016092	2.19722	0.3333	1	0.241749	2.43022	0	3.04452	0.425272	0.0173	0.0980756	0.0525553
9	2011	S	0	0	深圳市	0.00601363	0	3.75	3	69.12	2	62.29	6	82.21	2	63.75	0.141462	5.89623	-4.2501	-0.99876	0.101726	0.0282654	8.64769	0.931098	9.888	0.0154	11.6121	3.34599	0.0061263	23.1901	0.650402	0.034886	0.097123	0.372783	-0.0702688	0.475386	0.0838462	0.263767	2.19722	0.3333	1	0.259158	1.65235	0	3.09104	0.387963	0.0168	0.103504	0.0456662
9	2012	S	0	0	深圳市	0.00885852	0	3.25	3	68.1	2	60.58	5	76.25	3	66.27	0.141247	3.85732	-4.28188	-1.08196	0.0621392	0.0436759	8.63799	0.985526	9.936	0.0468	11.7219	3.3371	0.00610993	23.3013	0.643669	0.024626	0.069734	0.322522	0.026628	0.422404	0.0889448	-0.010003	2.07944	0.375	1	0.243327	1.36857	0	3.13549	0.349116	0.0151	0.122069	0.0445381
9	2013	S	0	0	深圳市	0.00905586	0	3.75	4	72.14	3	65.39	5	75.95	4	72.78	0.15243	3.06284	-4.31924	-1.06567	0.0874952	0.0369808	8.90354	1.03207	10.237	0.0194	11.7297	3.42302	0.00917099	23.3342	0.628798	0.033166	0.091145	0.310272	0.00590807	0.416485	0.116107	0.032409	2.07944	0.375	1	0.245917	1.49447	0	3.17805	0.323573	0.0151	0.124445	0.06919
9	2014	S	0	0	深圳市	0.00978294	0	4	4	72.9	1	52.5	5	76.98	5	79.7	0.209335	2.44694	-4.35256	-1.1012	0.0881063	0.0167355	8.91691	1.03989	10.445	0.0314	11.915	3.44766	0.00591183	23.4128	0.628934	0.033352	0.089865	0.304297	0.0322322	0.416864	0.112365	0.037654	1.94591	0.4286	1	0.21818	1.94283	0	3.21888	0.285349	0.0151	0.10311	0.0623257
9	2015	S	0	0	深圳市	0.00929119	0	4.75	5	77.59	2	64.69	5	78.2	6	83.16	0.132999	1.526	-4.37241	-1.10914	0.149926	0.012033	9.01213	1.10955	11.076	0.0448	11.9703	5.15504	0.0122448	23.6199	0.638202	0.058826	0.160746	0.296312	0.000694846	0.342964	0.12435	0.128465	1.94591	0.4286	1	0.202319	2.13849	0	3.2581	0.23761	0.0842	0.107344	0.0673996
9	2016	S	0	1	深圳市	0.00746342	0	5	5	75.92	1	59.52	6	80.67	6	80.42	0.113448	2.60524	-4.39226	-1.10447	0.0485285	0.0355586	9.09234	1.2159	10.49	0.0818	12.0282	4.85968	0.0207014	23.797	0.623791	0.021113	0.057118	0.32271	-0.000562443	0.360225	0.138208	0.317839	2.19722	0.3333	1	0.196374	1.64468	0	3.29584	0.204071	0.1022	0.116168	0.0228202
9	2017	S	0	1	深圳市	0.0106011	0	5	5	78.01	4	70.55	6	80.86	5	79.62	0.111243	2.11445	-4.40261	-1.10266	0.0289958	0.0255363	9.30055	1.28451	10.61	0.0391	12.1202	4.69248	0.0156436	24.0231	0.633121	0.013266	0.035756	0.288248	0.0144196	0.333569	0.137033	0.095413	2.19722	0.3333	1	0.196534	1.20351	0	3.3322	0.204031	0.1232	0.131152	0.0488005
9	2018	S	0	1	深圳市	0.0111996	0	4.5	4	74.46	1	57.99	6	81.44	5	77.54	0.083411	1.12841	-4.42864	-1.12661	0.0632938	0.0273394	9.51929	1.32152	10.854	0.0519	12.1525	4.8295	0.0229123	24.1194	0.649896	0.023352	0.065214	0.411366	0.0912181	0.320261	0.140172	0.668047	2.19722	0.3333	1	0.242114	0.960785	0	3.3673	0.209145	0.1232	0.0626379	0.0315796
9	2019	S	0	1	深圳市	0.00801357	0	4.75	5	78.34	3	67.08	7	87.98	5	77.28	0.141437	2.15398	-4.46685	-1.10471	0.0657164	0.0287272	9.49092	1.38968	11.342	0.0787	12.2234	5.034	0.0203671	24.1314	0.645559	0.023705	0.067289	0.397896	0.0442812	0.302803	0.154364	0.019903	2.07944	0.375	1	0.245187	1.17165	0	3.4012	0.219905	0.1232	0.0606866	0.0300148
9	2020	S	0	1	深圳市	0.0134731	0	4.25	4	74.62	2	61.58	6	80.2	5	77.03	0.128459	2.09021	-4.49876	-1.13245	0.0808167	0.0297032	9.4989	1.42588	11.673	0.0643	11.9786	5.71698	0.012166	24.1845	0.584217	0.034406	0.089233	0.341354	0.0205653	0.267891	0.144388	-0.113391	2.19722	0.3333	1	0.273742	1.19178	0	3.43399	0.270736	0.1473	0.0763226	0.009862
9	2021	S	0	1	深圳市	0.0344941	0	4.25	4	71.64	1	59.53	5	75.8	5	77.94	0.156788	2.73435	-4.5143	-1.12306	0.11929	0.020856	9.57046	1.36837	12.014	0.0511	12.0649	5.91092	0.0124654	24.3362	0.577624	0.051041	0.121721	0.509313	-0.00753301	0.273535	0.132939	0.656944	2.07944	0.375	1	0.286315	1.57527	0	3.46574	0.389644	0.1473	0.0626811	0.0100189
9	2022	S	0	1	深圳市	0.0316361	0	4	4	73.4	3	66.49	5	75.34	5	77.25	0.029892	2.56086	-4.49151	-1.1483	0.144412	0.0161493	9.75226	1.35959	12.364	0.0329	12.1187	6.1461	0.0141639	24.6801	0.639676	0.055233	0.143067	0.716123	0.00555475	0.233186	0.150556	0.822934	2.07944	0.375	1	0.394071	1.23344	0	3.49651	0.445754	0.1473	0.0419575
9	2023	S	0	1	深圳市	0.0257724	0	4.75	5	75.77	4	70.52	5	76.48	5	79.13	0.122384	1.51855	-4.53988	-1.08764	0.0869055	0.0154151	9.71686	1.3905	12.725	0.0663	12.1819	6.30369	0.0131461	24.6373	0.580376	0.032802	0.084331	0.599018	0.118995	0.210305	0.2223	-0.040677	2.07944	0.375	1	0.426906	1.18278	0	3.52636	0.524063	0.1473	0.0454811
10	2013	C	0	0	深圳市	0.0527439	0	2	2	64.95	1	50.95	1	59.44	5	75.6	0.73207	-0.876064	-4.04307	-0.933706	0.00581031	0.0424854	6.39024	1.03207	10.237	0.0194	11.7297	3.42302	0.00917099	20.7507	0.358152	0.004879	0.008994	0.464011	0.00412459	0.276188	0.0424896	0.925853	2.3979	0.3636	0	0.51738	2.7277	0	3.2581	0.53475	0	0.162958	0.0801587
10	2014	C	1	0	深圳市	0	0	2.75	3	66.86	1	53.99	1	57.95	5	79.25	0.584328	2.53515	-4.046	-0.86661	#N/A	0.0758156	5.71043	1.03989	10.445	0.0314	11.915	3.44766	0.00591183	20.5054	0.314128	-0.082225	-0.124362	0.251418	-0.15007	0.170678	0.0598226	-0.364488	2.30259	0.4	0	0.476855	3.87786	0	3.29584	0.4863	0	0.268292	0.0971894
10	2015	E	0	0	深圳市	0.0483286	0	2.25	2	60.66	1	50.95	1	50.68	4	72.22	0.431087	0.076823	-4.23794	-1.07866	0.00928872	0.0212982	6.20658	1.10955	11.076	0.0448	11.9703	5.15504	0.0122448	22.3646	0.579577	0.006696	0.014677	0.320924	-0.075167	0.278469	0.0110846	3.1571	2.30259	0.4	0	0.384487	1.58894	0	3.3322	0.44836	0	0.0855451	0.158111
10	2016	E	0	1	深圳市	0.0705051	0	1.75	2	60.43	1	52.59	1	57.95	3	65.97	0.563599	2.51926	-4.27767	-0.972104	0.017937	0.0128198	6.24028	1.2159	10.49	0.0818	12.0282	4.85968	0.0207014	22.3029	0.544721	0.007765	0.017729	0.210119	-0.0166917	0.370824	0.0143739	0.100431	2.3979	0.3636	0	0.355697	1.41983	0	3.3673	0.434466	0.2294	0.111452	0.424668
10	2017	E	0	1	深圳市	0.0728002	0	1.5	1	55.29	1	49.93	1	59.92	1	54.8	0.411462	2.36332	-4.30593	-0.956929	#N/A	0.0168815	6.19236	1.28451	10.61	0.0391	12.1202	4.69248	0.0156436	21.8563	0.620116	-0.263459	-0.617347	0.190163	0.181686	0.607982	0.0202226	-0.280622	2.3979	0.3636	0	0.340263	1.66949	0	3.4012	0.398568	0.2294	0.165885	0.421441
10	2018	E	0	1	深圳市	0.156081	0	1.5	2	60.9	1	51.57	3	65.77	2	62.21	0.41938	6.19675	-4.34821	-0.926456	#N/A	0.0586072	6.30079	1.32152	10.854	0.0519	12.1525	4.8295	0.0229123	21.9091	0.819505	-0.227803	-0.820729	0.108306	-0.0728419	0.376904	0.0217	-0.544245	2.30259	0.4	0	0.316544	1.40509	0	3.43399	0.426086	0	0.409982	0.298398
10	2020	E	0	1	深圳市	0.355046	0	1	1	50.76	1	52.65	2	63.15	1	41.45	0.689465	5.87965	-4.43117	0	0.103193	0.0353899	5.62762	1.42588	11.673	0.0643	11.9786	5.71698	0.012166	21.9879	0.769527	0.019495	0.097266	0.359625	-0.101871	0.057608	0.00644425	-0.255949	2.3979	0.3636	0	0.336375	1.42968	0	3.49651	0.432887	0	0.0648751	0.107704
10	2021	E	0	1	深圳市	0.263997	0	1.75	2	64.97	2	60.03	5	75.34	2	61.7	0.61729	4.97402	-4.47713	-0.964295	0.0479125	0.0364121	5.66988	1.36837	12.014	0.0511	12.0649	5.91092	0.0124654	22.2466	0.812883	0.009656	0.046871	0.432245	-0.0120536	0.0382264	0.0040145	0.247323	2.3979	0.3636	0	0.337342	1.30994	0	3.52636	0.415677	0	0.0429557	0.115835
10	2022	E	0	1	深圳市	0.236818	0	2.75	3	68.75	2	60.03	5	76.27	4	70.64	0.364689	6.81076	-4.51192	-0.922024	#N/A	0.0589472	5.28827	1.35959	12.364	0.0329	12.1187	6.1461	0.0141639	22.0105	0.752552	-0.167251	-0.782503	0.14934	-0.168154	0.0312396	0.00382294	-0.651061	1.60944	0.4	0	0.483391	1.41848	0	3.55535	0.546006	0	0.123923
10	2023	E	0	1	深圳市	0.206528	0	2.25	2	62.41	2	60.03	4	74.3	1	55.97	0.327071	7.08838	-4.5464	-0.932393	#N/A	0.0666423	4.97673	1.3905	12.725	0.0663	12.1819	6.30369	0.0131461	21.8668	0.920556	-0.200381	-1.1824	0.089614	-0.0542133	0.0306071	0.00332546	-0.50589	1.60944	0.4	0	0.425735	1.49311	0	3.58352	0.505959	3.0009	0.309861
11	2009	S	0	0	深圳市	0	0	4.25	4	74.07	1	56.24	5	76.8	5	77.35	0.438748	-0.198698	-4.22142	-1.0583	0.157783	0.0190621	7.8932	0.930005	9.244	0	11.4379	3.48536	0.009652	21.7651	0.766335	0.039203	0.157134	0.34189	0.268009	0.44301	0.0271611	0.355917	2.19722	0.3333	0	0.656854	1.55956	1	3.29584	0.65194	0.0009	0.120669	0.0160937
11	2010	K	0	0	深圳市	0	0	3.5	3	69.11	1	53.09	5	77.64	3	66.31	0.622446	2.80589	-4.26285	-0.930913	0.24998	0.0129709	7.92008	0.90881	9.835	0.0341	11.5795	3.54004	0.0104203	21.7925	0.699635	0.060893	0.227662	0.345591	-0.034936	0.541034	0.0268126	0.174845	2.07944	0.375	0	0.650341	1.31295	1	3.3322	0.65274	0.0009	0.0932794	0.0275985
11	2011	K	0	0	深圳市	0	0	4	4	72.6	1	56.24	5	79.31	4	71.64	0.305205	5.86701	-4.31075	-0.952332	0.294696	0.000956389	7.90949	0.931098	9.888	0.0154	11.6121	3.34599	0.0061263	21.9759	0.676791	0.080295	0.256671	0.439292	-0.103288	0.518627	0.0185768	0.418244	2.19722	0.3333	0	0.654925	1.19535	1	3.3673	0.65454	0	0.0655226	0.0140437
11	2012	K	0	0	深圳市	2.27874e-06	0	4	4	72.14	1	54.67	4	74.71	5	75.45	0.476718	1.20479	-4.35439	-0.973526	0.300141	0.0016128	7.91936	0.985526	9.936	0.0468	11.7219	3.3371	0.00610993	22.0972	0.619304	0.099916	0.283276	0.496166	0.203942	0.582345	0.0199512	0.321415	2.19722	0.3333	0	0.64767	1.20314	1	3.4012	0.652327	0	0.0589269	0.0256367
11	2013	K	0	0	深圳市	0	0	4.5	5	75.23	1	53.09	5	76.8	6	81.04	0.447646	-0.115333	-4.39388	-1.00322	0.0919278	0.00204463	8.04238	1.03207	10.237	0.0194	11.7297	3.42302	0.00917099	22.0774	0.534334	0.076902	0.181905	0.413915	0.0285095	0.542541	0.0194413	-0.130055	2.19722	0.3333	0	0.646153	1.2542	1	3.43399	0.646827	0	0.0677252	0.041172
11	2014	K	0	0	深圳市	0	0	5	5	77.52	1	56.91	6	80.98	6	81.04	0.628351	-0.011438	-4.43395	-1.01	0.160105	0.00170949	8.06054	1.03989	10.445	0.0314	11.915	3.44766	0.00591183	22.0799	0.465632	0.107651	0.215275	0.327066	-0.00376667	0.598326	0.0164987	-0.216632	2.19722	0.3333	0	0.6459	1.3239	1	3.46574	0.645295	0	0.0819235	0.0445767
11	2015	K	0	0	深圳市	0	0	5	5	76.96	3	65.02	5	76.8	6	81.04	0.598252	-0.066855	-4.47649	-0.984303	0.0548004	0.002653	7.94414	1.10955	11.076	0.0448	11.9703	5.15504	0.0122448	22.2003	0.520347	0.037957	0.075108	0.26078	0.070727	0.563122	0.0196197	-0.150603	2.19722	0.3333	0	0.646223	1.49364	1	3.49651	0.643081	0	0.0955693	0.0432983
11	2016	K	0	1	深圳市	0	0	4.25	4	73.24	2	60.06	4	70.54	6	80.15	0.336359	-3.78395	-4.51562	-1.08972	0.114424	0.00143399	7.93021	1.2159	10.49	0.0818	12.0282	4.85968	0.0207014	22.6185	0.637636	0.06432	0.157293	0.373243	0.338431	0.388566	0.0111103	0.911239	2.19722	0.3333	0	0.653879	1.42149	1	3.52636	0.643713	0	0.0483335	0.0362029
11	2017	K	0	1	深圳市	0	0	4.75	5	76.7	2	60.97	5	77.05	6	81.55	0.558902	0.449399	-4.55794	0	0.179217	0.0169368	8.55564	1.28451	10.61	0.0391	12.1202	4.69248	0.0156436	22.4084	0.458117	0.103416	0.233588	0.482199	-0.0642033	0.343141	0.00544133	0.410589	2.07944	0.375	0	0.653879	1.41874	1	3.55535	0.643711	0	0.047175	0.0181075
11	2018	K	0	1	深圳市	0	0	5	5	78.36	1	57.81	6	83.32	6	80.45	0.402664	-5.68124	-4.59753	-1.0462	0.141381	0.00419718	8.61323	1.32152	10.854	0.0519	12.1525	4.8295	0.0229123	22.4846	0.425931	0.105705	0.189235	0.497121	0.193051	0.203045	0.00560334	-0.040435	2.19722	0.3333	0	0.647416	1.09192	1	3.58352	0.642862	0	0.0369011	0.0095728
11	2019	K	0	1	深圳市	0	0	4.75	4	73.32	1	55.57	6	81.23	4	71.68	0.332008	-1.41813	-4.61598	-1.07644	0.192618	0.0852153	8.9579	1.38968	11.342	0.0787	12.2234	5.034	0.0203671	23.1003	0.696768	0.083405	0.207644	0.445235	0.0872398	0.456116	0.00868488	0.421359	2.19722	0.3333	0	0.647493	1.18667	1	3.61092	0.642745	0	0.0516587	0.0077158
11	2020	K	0	1	深圳市	1	0	4.75	5	76.46	1	57.14	7	85.82	4	73.96	0.357044	1.21267	-4.64762	-1.07067	0.147834	0.0646373	8.99156	1.42588	11.673	0.0643	11.9786	5.71698	0.012166	23.2253	0.690259	0.06365	0.20754	0.357215	0.0315791	0.435188	0.00952163	0.036021	2.19722	0.3333	0	0.628335	1.241	1	3.63759	0.635799	0	0.0581392	0.0186423
11	2021	K	0	1	深圳市	1	0	4.25	4	73.13	3	65.5	4	74.85	5	77.82	0.362888	3.831	-4.67342	-1.07194	0.147229	0.0567044	8.94351	1.36837	12.014	0.0511	12.0649	5.91092	0.0124654	23.403	0.689266	0.073668	0.237424	0.335356	-0.124354	0.625702	0.00741751	0.094434	2.19722	0.3333	0	0.621457	1.1344	1	3.66356	0.620519	0	0.0587048	0.0213519
11	2022	K	0	1	深圳市	1	0	4	4	71.84	3	65.5	5	75.03	4	74.42	0.320106	3.70621	-4.70612	-1.09119	0.0756251	0.0404995	9.14099	1.35959	12.364	0.0329	12.1187	6.1461	0.0141639	23.4833	0.717169	0.034557	0.116266	0.242111	0.0066602	0.694629	0.00523694	-0.174377	2.30259	0.3	0	0.603091	1.12673	1	3.68888	0.610245	0	0.0889785
11	2023	K	0	1	深圳市	1	0	4.75	5	76.3	4	72.23	6	80.6	5	76.25	0.284703	3.8066	-4.73905	-1.08615	0.0594423	0.0367549	9.08444	1.3905	12.725	0.0663	12.1819	6.30369	0.0131461	23.5558	0.723116	0.02742	0.098069	0.180729	-0.0155458	0.653295	0.00391077	-0.20049	2.30259	0.3	0	0.606018	1.01271	1	3.71357	0.61323	0	0.104744
12	2009	C	0	0	深圳市	0	0	4.75	5	78.88	3	67.13	6	80.16	6	84.02	0.324471	0.512054	-4.13517	-1.09642	0.0948924	0.00140902	9.22118	0.930005	9.244	0	11.4379	3.48536	0.009652	23.1133	0.485852	0.085922	0.17548	0.495937	0.153045	0.0340222	0.73807	0.235347	2.19722	0.3333	1	0.251714	1.91213	0	3.2581	0.450109	0.7797	0.0795523	0.0181734
12	2010	C	0	0	深圳市	0	0	5	5	77.98	3	65.55	5	78.44	6	84.02	0.089013	-1.39152	-4.16606	-1.06351	0.147748	0.00534277	9.36897	0.90881	9.835	0.0341	11.5795	3.54004	0.0104203	23.2466	0.457945	0.136592	0.258193	0.662357	0.189766	0.0383922	0.708193	0.466906	2.19722	0.3333	1	0.164487	3.06295	0	3.29584	0.381207	0.6509	0.0718389	0.0559474
12	2011	C	0	0	深圳市	0	0	5.75	6	80.12	4	72.78	6	82.87	6	82.02	0.166245	2.01626	-4.18922	-1.07881	0.15198	0.00337376	9.38505	0.931098	9.888	0.0154	11.6121	3.34599	0.0061263	23.4499	0.521906	0.096394	0.190189	0.596067	0.110496	0.0313922	0.617201	0.068026	2.19722	0.3333	1	0.118937	1.50239	0	3.3322	0.193231	0.6574	0.0740195	0.0615633
12	2012	C	0	0	深圳市	0	0	5.25	5	77.63	3	65.55	5	77.3	6	84.02	0.126527	2.25731	-4.23489	-1.09017	0.00811494	0.00439789	9.339	0.985526	9.936	0.0468	11.7219	3.3371	0.00610993	23.386	0.493004	0.024972	0.050748	0.472317	0.120384	0.0256207	0.656986	-0.154324	2.19722	0.3333	1	0.121532	1.47448	0	3.3673	0.239519	0.5853	0.0753335	0.263295
12	2013	C	0	0	深圳市	0	0	4.25	4	73.29	1	53.65	4	72.25	6	84.02	0.168766	-0.382401	-4.27044	-1.0919	0.134906	0.00725293	9.20593	1.03207	10.237	0.0194	11.7297	3.42302	0.00917099	23.4366	0.442868	0.110232	0.206931	0.525846	0.112665	0.0251136	0.529213	0.105719	2.19722	0.3333	1	0.1169	1.39645	0	3.4012	0.1923	0.6239	0.0868036	0.248266
12	2014	C	0	0	深圳市	0	0	4	4	73.86	3	65.55	3	68.04	6	82.02	0.045905	-1.59388	-4.3092	-1.09075	-0.0130466	0.0126635	9.25263	1.03989	10.445	0.0314	11.915	3.44766	0.00591183	23.4501	0.442985	0.056255	0.100983	0.464015	0.0920062	0.0255589	0.644522	-0.089127	2.19722	0.3333	0	0.10753	1.42854	0	3.43399	0.156545	0.6463	0.0848565	0.267432
12	2015	C	0	0	深圳市	0	0	4.75	5	76.32	2	63.97	5	77.23	6	82.02	0.170112	0.163555	-4.34697	-1.09908	-0.00969745	0.0181261	9.26369	1.10955	11.076	0.0448	11.9703	5.15504	0.0122448	23.4742	0.511696	0.035597	0.067211	0.482933	0.0697975	0.0223812	0.651438	0.054849	1.60944	0.6	0	0.234468	1.91822	0	3.46574	0.317662	0.5576	0.0905273	0.0131446
12	2016	C	0	1	深圳市	0	0	5	5	75.96	2	62.39	5	77.23	6	82.02	0.106341	0.983889	-4.37811	-1.09843	0.0792161	0.0117112	9.35141	1.2159	10.49	0.0818	12.0282	4.85968	0.0207014	23.5651	0.525907	0.049284	0.101942	0.549943	0.130686	0.0278641	0.668227	0.207673	1.94591	0.4286	0	0.263034	1.63129	0	3.49651	0.328265	0	0.0854225	0.0255728
12	2017	C	0	1	深圳市	0	0	5	5	78.31	3	65.46	5	79.58	6	84.02	0.11455	0.911139	-4.40414	-1.09593	0.0872341	0.0105421	9.40137	1.28451	10.61	0.0391	12.1202	4.69248	0.0156436	23.6955	0.55057	0.04518	0.098012	0.593177	0.126104	0.0351111	0.590774	0.212313	2.19722	0.3333	0	0.252709	1.40204	0	3.52636	0.297774	0.4243	0.0845019	0.0133011
12	2018	C	0	1	深圳市	0	0	5.25	5	78.3	3	69.76	6	81.3	6	80.65	0.085395	0.887734	-4.44658	-1.09191	0.0360778	0.0108518	9.2873	1.32152	10.854	0.0519	12.1525	4.8295	0.0229123	23.6737	0.505634	0.024436	0.051808	0.549039	0.111455	0.0313975	0.519552	-0.024766	2.07944	0.375	0	0.252135	1.0042	0	3.55535	0.307765	0.6029	0.0689178	0.0170993
12	2019	C	1	1	深圳市	0	0	5	5	77.28	5	75.81	4	70.17	6	82.83	0.133798	0.49642	-4.4919	-1.10361	0.0360117	0.0111451	9.25474	1.38968	11.342	0.0787	12.2234	5.034	0.0203671	23.6248	0.457957	0.030037	0.058029	0.56127	0.130707	0.04463	0.537493	-0.013001	2.07944	0.375	0	0.255494	1.13886	0	3.58352	0.322379	0.3327	0.0575429	0.0318748
12	2020	C	1	1	深圳市	0	0	5	5	77.66	4	72.59	4	74.11	6	82.65	0.161558	-0.364438	-4.53377	-1.09926	0.0499342	0.0112381	9.26464	1.42588	11.673	0.0643	11.9786	5.71698	0.012166	23.6071	0.406367	0.045003	0.079286	0.591465	0.152694	0.045583	0.511418	0.019025	2.19722	0.3333	0	0.267205	1.37167	0	3.61092	0.335149	0.1924	0.0625022	0.0317001
12	2021	C	1	1	深圳市	0	0	4.25	4	71	1	57.1	5	77.34	6	82.08	0.155337	-1.91243	-4.56182	-1.10081	0.0867366	0.00921277	9.38513	1.36837	12.014	0.0511	12.0649	5.91092	0.0124654	23.716	0.404872	0.082557	0.138887	0.720688	0.195698	0.0548566	0.429628	0.277173	2.19722	0.3333	0	0.266951	1.53167	0	3.63759	0.401691	0.1528	0.0552208	0.0149351
12	2022	C	1	1	深圳市	0	0	3.5	3	69.36	1	56.94	4	74.45	5	79.58	0.104717	0.304802	-4.56893	-1.11467	0.134215	0.00748329	9.56514	1.35959	12.364	0.0329	12.1187	6.1461	0.0141639	23.9777	0.483645	0.089153	0.161923	0.663121	0.0755529	0.0688674	0.434035	0.115171	2.07944	0.375	0	0.23711	1.10564	0	3.66356	0.303782	0.0887	0.0473026
12	2023	C	1	1	深圳市	0	0	3.75	4	71.67	1	57.52	5	76.55	6	83.81	0.115532	0.410652	-4.58609	-1.12842	0.119046	0.00586117	9.59295	1.3905	12.725	0.0663	12.1819	6.30369	0.0131461	24.1365	0.521221	0.054969	0.110806	0.646744	0.090896	0.0523754	0.43296	0.197132	2.07944	0.375	0	0.248451	0.96309	0	3.68888	0.29367	0.0887	0.0475613
14	2009	K	0	0	深圳市	0	0	4.5	4	73.44	1	53.09	5	76.8	5	76.97	0.475563	2.30299	-3.98526	-1.03075	0.187579	0.0126693	4.64439	0.930005	9.244	0	11.4379	3.48536	0.009652	21.2783	0.719721	0.04879	0.181623	0.407079	0.245638	0.660449	0.0186456	1.22309	2.19722	0.4444	0	0.406061	2.51452	1	2.89037	0.524064	0.0006	0.0825104	0.0101528
14	2010	K	0	0	深圳市	0	0	4	4	72.69	1	59.84	4	72.63	5	76.97	0.719162	2.24455	-4.0162	-0.966828	0.144219	0.0151364	4.58497	0.90881	9.835	0.0341	11.5795	3.54004	0.0104203	21.1868	0.647874	0.046593	0.148121	0.441335	0.0423921	0.669252	0.0192048	0.059516	2.19722	0.4444	0	0.383076	1.81388	1	2.94444	0.412754	0.0005	0.0934078	0.0177572
14	2011	K	0	0	深圳市	0	0	4	4	73.27	1	51.51	4	72.63	6	81.04	0.575371	6.20005	-4.0682	-0.944141	0.11147	0.00733494	5.17615	0.931098	9.888	0.0154	11.6121	3.34599	0.0061263	21.3096	0.663812	0.038165	0.111051	0.236097	-0.145974	0.749757	0.0159309	-0.456148	2.19722	0.3333	0	0.377352	1.21372	1	2.99573	0.402088	0	0.165274	0.012073
14	2012	K	0	0	深圳市	0	0	4.75	5	76.84	1	54.89	6	80.98	6	80.15	0.379714	4.28634	-4.11844	-0.980799	0.0464814	0.0050536	5.15329	0.985526	9.936	0.0468	11.7219	3.3371	0.00610993	21.4266	0.686526	0.017379	0.053612	0.220707	0.0457373	0.752823	0.0132673	0.053701	2.19722	0.3333	0	0.378937	1.53308	1	3.04452	0.3947	0	0.159916	0.0146118
14	2013	K	0	0	深圳市	1	0	4	3	65.69	1	51.51	4	74.71	2	61.81	0.631911	3.29797	-4.15287	-0.983283	0.0509733	0.00564406	5.3799	1.03207	10.237	0.0194	11.7297	3.42302	0.00917099	21.3613	0.649425	0.017994	0.054295	0.288228	0.0392027	0.762465	0.014854	0.338565	2.19722	0.3333	0	0.425007	1.74282	1	3.09104	0.4168	0	0.12184	0.0172617
14	2014	K	0	0	深圳市	1	0	4	5	75.78	1	53.31	6	84.32	5	75.11	0.662303	4.98057	-4.20638	-0.971332	0.0887274	0.00600396	5.3799	1.03989	10.445	0.0314	11.915	3.44766	0.00591183	21.5283	0.676601	0.030408	0.090538	0.247885	-0.143933	0.783595	0.0100842	-0.092446	2.19722	0.3333	0	0.357038	1.92106	1	3.13549	0.320778	0	0.152772	0.01405
14	2015	K	0	0	深圳市	1	0	4.25	4	73.83	1	51.51	5	78.06	5	77.18	0.726729	2.98123	-4.24413	-0.941343	0.0632027	0.00529569	5.22575	1.10955	11.076	0.0448	11.9703	5.15504	0.0122448	21.4982	0.643892	0.024238	0.071391	0.187515	0.0183802	0.834166	0.00947291	-0.192651	2.19722	0.3333	0	0.465059	2.76362	1	3.17805	0.47572	0.0011	0.15447	0.0227029
14	2016	K	0	1	深圳市	1	0	4	4	72.01	1	51.51	4	74.3	5	76.59	0.787596	1.25747	-4.27198	-1.00672	0.0339458	0.00581633	5.0876	1.2159	10.49	0.0818	12.0282	4.85968	0.0207014	21.3512	0.575952	0.014397	0.037145	0.306977	0.237114	0.740777	0.0106344	0.502267	2.19722	0.3333	0	0.495443	2.81387	1	3.21888	0.515523	0.0011	0.0874778	0.0557345
14	2017	K	0	1	深圳市	1	0	4	4	73.15	1	52.41	5	75.8	5	77.48	0.863018	0.702255	-4.29207	-1.00298	0.0113392	0.00723392	5.04986	1.28451	10.61	0.0391	12.1202	4.69248	0.0156436	21.1474	0.476437	0.00646	0.013781	0.301662	0.274311	0.728515	0.0117288	-0.173363	2.19722	0.3333	0	0.437306	1.8992	1	3.2581	0.416922	0	0.111883	0.0561362
14	2018	K	0	1	深圳市	1	0	4	4	73.09	1	54.21	4	74.71	5	77.78	0.880786	3.8313	-4.354	-0.964284	0.174538	0.00607512	4.99721	1.32152	10.854	0.0519	12.1525	4.8295	0.0229123	21.3742	0.504366	0.089694	0.176556	0.207765	-0.0616091	0.785658	0.00805614	-0.302474	2.19722	0.3333	0	0.372201	1.48172	1	3.29584	0.3556	0	0.165223	0.0468811
14	2019	K	0	1	深圳市	1	0	4	4	71.57	1	52.41	4	72.63	5	76.89	0.861133	2.91317	-4.39643	-0.992249	0.0323032	0.00333107	5.03695	1.38968	11.342	0.0787	12.2234	5.034	0.0203671	21.4025	0.515342	0.016522	0.033713	0.225287	0.0164713	0.734123	0.00717518	0.224095	2.19722	0.3333	0	0.375803	1.46744	1	3.3322	0.345917	0	0.143477	0.0122151
14	2020	K	0	1	深圳市	0	0	4	4	73.31	1	52.41	5	76.8	5	76.89	0.768555	0.868381	-4.45229	-1.00311	0.0079484	0.00206307	5.03044	1.42588	11.673	0.0643	11.9786	5.71698	0.012166	21.6127	0.608096	0.004146	0.009567	0.157362	0.106485	0.710583	0.0104487	-0.208761	2.19722	0.3333	0	0.391036	1.29435	1	3.3673	0.340709	0	0.158691	0.0598071
14	2021	K	0	1	深圳市	0	0	4	4	72.33	3	65.5	4	72.44	5	77.59	0.777557	3.31891	-4.49503	-1.03432	0.0407505	0.00221631	4.85203	1.36837	12.014	0.0511	12.0649	5.91092	0.0124654	21.655	0.608645	0.019704	0.050313	0.258111	-0.0285489	0.710799	0.00970559	0.851127	2.07944	0.375	0	0.401021	1.23786	1	3.4012	0.344376	0	0.101356	0.126298
14	2022	K	0	1	深圳市	0	0	4	4	72.84	3	65.5	4	73.88	5	77.81	0.7645	0.92371	-4.54416	-1.04573	0.218924	0.00320986	4.69135	1.35959	12.364	0.0329	12.1187	6.1461	0.0141639	21.8188	0.59228	0.089717	0.224176	0.276191	0.11786	0.637681	0.00763763	0.189899	2.19722	0.3333	0	0.370824	1.417	1	3.43399	0.353635	0	0.0840345
14	2023	K	0	1	深圳市	0	0	4.75	5	79.33	4	73.67	6	81.54	6	82.11	0.822238	-1.11323	-4.57436	0	0.322334	0.00334522	4.72739	1.3905	12.725	0.0663	12.1819	6.30369	0.0131461	21.6445	0.319088	0.190582	0.357938	0.504891	0.19102	0.624483	0.00828241	0.81929	2.19722	0.3333	0	0.376018	1.37981	1	3.46574	0.353019	0	0.0437922
16	2009	C	0	0	深圳市	0	0	3.75	4	70.78	1	52.93	2	64.98	6	83.81	0.216633	2.77632	-4.3195	-1.09058	0.0340847	0.00144254	7.84581	0.930005	9.244	0	11.4379	3.48536	0.009652	23.331	0.697358	0.012222	0.0362	1.0995	0.0216761	0.263912	0.105665	0.086335	1.94591	0.4286	0	0.285104	1.18728	1	3.4012	0.49022	0.0005	0.0343838	0.0069094
16	2010	C	0	0	深圳市	0	0	2	2	64.06	1	59.21	4	71.68	2	61.41	0.153584	2.32375	-4.34214	-1.05379	0.0215615	0.0055952	9.92447	0.90881	9.835	0.0341	11.5795	3.54004	0.0104203	23.5246	0.743477	0.006738	0.024294	1.13944	-0.026283	0.226129	0.0903855	0.290551	1.94591	0.4286	0	0.275903	1.02331	1	3.43399	0.293956	0.0005	0.031558	0.0286763
16	2011	C	0	0	深圳市	0	0	3	3	68.67	2	62.37	3	68.83	4	71.79	0.09599	5.50353	-4.37953	-1.06505	0.00287377	0.00794568	9.88959	0.931098	9.888	0.0154	11.6121	3.34599	0.0061263	23.551	0.749408	0.001449	0.005716	0.97189	-0.0810629	0.167368	0.105241	-0.052236	1.94591	0.4286	0	0.280537	0.936678	1	3.46574	0.288218	0	0.0358565	0.221598
16	2012	C	0	0	深圳市	0	0	4	4	70.88	2	63.95	3	66.47	5	77.39	0.106999	5.08792	-4.42157	-1.09698	0.00792719	0.0191144	9.94261	0.985526	9.936	0.0468	11.7219	3.3371	0.00610993	23.5304	0.743593	0.002715	0.010712	1.0958	-0.0216897	0.245086	0.11398	0.130737	1.94591	0.4286	0	0.275037	0.945777	1	3.49651	0.271012	0	0.0357542	0.225054
16	2013	C	0	0	深圳市	0	0	4	4	74.56	3	65.74	4	71.18	6	81.36	0.108503	2.0594	-4.46646	-1.09938	0.0112944	0.0189763	9.93023	1.03207	10.237	0.0194	11.7297	3.42302	0.00917099	23.4797	0.728132	0.003705	0.014036	1.23857	0.14503	0.227568	0.121227	0.091007	1.94591	0.4286	0	0.28263	0.975934	1	3.52636	0.265142	0	0.033708	0.194192
16	2014	C	1	0	深圳市	0	0	4	4	73.75	3	65.74	3	67.33	6	82.17	0.155055	3.62244	-4.50028	-1.0844	0.0114108	0.017818	9.84033	1.03989	10.445	0.0314	11.915	3.44766	0.00591183	23.5434	0.743884	0.003722	0.014111	1.19443	-0.0381651	0.232693	0.106303	-0.029153	1.94591	0.4286	0	0.310926	1.06357	1	3.55535	0.358598	0	0.035366	0.0555629
16	2015	C	1	0	深圳市	0	0	4	4	72.73	2	64.16	2	62.27	6	84.17	0.073227	2.34521	-4.55541	-1.03392	#N/A	0.0112394	9.82774	1.10955	11.076	0.0448	11.9703	5.15504	0.0122448	23.38	0.784184	-0.082234	-0.34609	1.18565	0.0904959	0.202277	0.123751	-0.052942	1.60944	0.6	0	0.360871	1.5866	1	3.58352	0.39874	0	0.0378214	0.203596
16	2016	C	1	1	深圳市	0	0	4	4	72.22	3	69	2	64.63	5	78.98	0.05943	3.59031	-4.57754	-1.01765	0.028571	0.0128973	9.76365	1.2159	10.49	0.0818	12.0282	4.85968	0.0207014	23.5707	0.807546	0.005854	0.028832	1.28911	-0.0563782	0.248645	0.0912816	0.103515	1.94591	0.4286	1	0.361664	1.34468	1	3.61092	0.39564	0	0.029931	0.160748
16	2017	C	1	1	深圳市	0	0	4	4	74.07	4	70.39	2	64.86	6	82.17	0.272336	4.50905	-4.58153	-1.09021	0.412523	0.00774257	9.78819	1.28451	10.61	0.0391	12.1202	4.69248	0.0156436	23.8828	0.652011	0.249343	0.883385	1.5307	-0.183128	0.199092	0.0673708	0.538363	1.94591	0.4286	0	0.361077	1.15252	1	3.63759	0.378589	0.0011	0.0249046	0.143917
16	2018	C	1	1	深圳市	0.0611142	0	4.25	4	74.26	4	70.39	3	68.7	5	79.99	0.054117	4.37916	-4.57332	-1.11719	0.0474112	0.0124542	9.85035	1.32152	10.854	0.0519	12.1525	4.8295	0.0229123	24.2193	0.713465	0.02365	0.075766	1.63154	-0.0979178	0.166366	0.0730702	0.477109	1.94591	0.4286	1	0.360885	0.918139	1	3.66356	0.388097	0.0011	0.0139158	0.0104683
16	2019	C	1	1	深圳市	0.0467464	0	4	4	73.47	4	73.55	4	71.05	5	75.07	0.088832	3.71654	-4.57021	-1.12966	0.0220913	0.0416133	9.86713	1.38968	11.342	0.0787	12.2234	5.034	0.0203671	24.4748	0.766908	0.008864	0.034569	1.45872	-0.036254	0.124886	0.0601418	0.194948	1.94591	0.4286	1	0.360885	0.972553	1	3.68888	0.388198	0.0011	0.0155396	0.016006
16	2020	C	1	1	深圳市	0.0529504	0	4	4	71.84	4	73.55	2	63.54	5	76.57	0.060474	3.74278	-4.58075	-1.12566	0.0287172	0.0430212	9.75359	1.42588	11.673	0.0643	11.9786	5.71698	0.012166	24.6328	0.78505	0.011682	0.052313	1.08912	0.00358119	0.0906503	0.0637306	-0.086491	1.94591	0.4286	1	0.365276	1.03046	1	3.71357	0.380872	0.0011	0.0203167	0.0424871
16	2021	C	1	1	深圳市	0.0614758	0	4	4	73.24	2	62.45	5	76.67	5	76.44	0.093414	3.44574	-4.66185	-1.10544	0.0721333	0.046081	9.69511	1.36837	12.014	0.0511	12.0649	5.91092	0.0124654	24.409	0.744174	0.017976	0.077116	1.09429	0.0202825	0.102034	0.100573	-0.024732	1.94591	0.4286	1	0.386823	1.0457	1	3.73767	0.381087	0.0011	0.0195585	0.0467659
16	2022	C	1	1	深圳市	0.0680214	0	4	4	73.04	2	62.45	5	76.23	5	76.33	0.027188	4.43633	-4.71006	-1.03953	#N/A	0.0379343	9.5828	1.35959	12.364	0.0329	12.1187	6.1461	0.0141639	24.3613	0.777428	-0.045452	-0.189705	0.760239	-0.0138967	0.115997	0.108217	-0.397069	1.94591	0.4286	0	0.384255	1.00363	1	3.7612	0.39068	0	0.0320742
16	2023	C	1	1	深圳市	0.0681506	0	5	5	76.9	4	72.33	7	85.65	4	71.79	0.074078	4.3488	-4.76	-1.04433	#N/A	0.0276099	9.55436	1.3905	12.725	0.0663	12.1819	6.30369	0.0131461	24.3019	0.835125	-0.071387	-0.366884	0.483406	0.0154391	0.0907164	0.145662	-0.397142	1.94591	0.4286	0	0.369919	1.03964	1	3.78419	0.390589	0	0.0452414
17	2014	C	1	0	深圳市	0	0	2	2	63.75	1	51.35	1	53.04	5	77.31	0.003779	7.66437	-3.43682	-0.772827	0.338612	0.00992927	3.89182	1.03989	10.445	0.0314	11.915	3.44766	0.00591183	17.7569	0.737887	0.056975	0.545698	2.08935	0.0761522	0.119855	0.0150314	-0.217774	2.19722	0.3333	0	0.200335	53.5712	0	3.13549	0.197105	0.0015	0.0665292	0.0788457
17	2015	C	1	0	深圳市	0	0	2.75	3	66.35	1	47.98	2	60.1	5	79.95	0.011272	6.18324	-3.43023	-0.762324	#N/A	0.00862288	3.98898	1.10955	11.076	0.0448	11.9703	5.15504	0.0122448	17.6413	0.708077	-0.002176	-0.00788	3.51258	-0.0660363	0.0884527	0.0219735	-0.193712	2.07944	0.375	1	0.174259	122.189	0	3.17805	0.182365	0.0011	0.0315315	0.0445366
17	2016	C	1	1	深圳市	0	0	2.25	2	62.11	1	47.98	3	67.28	3	65.83	0.007546	5.54396	-3.53631	-0.760769	0.290626	0.0121792	3.97029	1.2159	10.49	0.0818	12.0282	4.85968	0.0207014	17.8061	0.680489	0.077865	0.253754	2.84062	0.0117298	0.0576546	0.068942	-0.169715	2.07944	0.375	1	0.187758	92.25	0	3.21888	0.192801	0.0011	0.0401868	0.0478368
17	2017	C	1	1	深圳市	0	0	2	2	62.99	1	49.36	1	57.74	4	73.49	0.132508	6.74027	-3.69333	0	0.0913806	0.00896829	3.93183	1.28451	10.61	0.0391	12.1202	4.69248	0.0156436	18.1136	0.743597	0.024742	0.087385	2.15421	-0.0466501	0.0377539	0.0535769	-0.031555	2.19722	0.3333	1	0.203362	33.8723	0	3.2581	0.2475	0.001	0.0417721	0.0748664
17	2018	C	1	1	深圳市	0	0	2	2	63.39	1	47.57	2	61.18	4	72.94	0.101222	9.2944	-3.73175	0	#N/A	0.0115306	3.97029	1.32152	10.854	0.0519	12.1525	4.8295	0.0229123	18.1093	0.768162	-0.025619	-0.104935	1.63358	-0.129425	0.0325848	0.0478245	-0.12789	2.19722	0.3333	1	0.188353	25.1325	0	3.29584	0.1951	0.001	0.0552702	0.0851549
17	2019	C	1	1	深圳市	0	0	2	2	63.44	1	49.36	2	63.54	4	70.57	0.914578	11.3942	-3.71376	0	#N/A	0.0118016	4.07754	1.38968	11.342	0.0787	12.2234	5.034	0.0203671	17.9544	0.817616	-0.11493	-0.549846	1.11817	-0.219849	0.0968911	0.0668143	-0.365986	2.19722	0.3333	1	0.188344	28.6413	0	3.3322	0.195007	0.001	0.0843099	0.0877485
17	2021	C	1	1	深圳市	0	0	2.75	3	68.18	2	60.95	3	68.23	4	72.32	0.920815	5.30913	-3.95294	-0.809634	#N/A	0.00508091	4.11087	1.36837	12.014	0.0511	12.0649	5.91092	0.0124654	18.394	0.753473	-0.01734	-0.066051	1.74766	0.160984	0.0847194	0.0353234	0.402088	2.19722	0.3333	1	0.192632	14.8452	0	3.4012	0.2025	0.001	0.037245	0.0392656
17	2022	C	1	1	深圳市	0	0	3	3	66.07	2	60.95	3	65.22	3	69.65	0.95105	4.01774	-4.39058	0	#N/A	0.00110377	4.14313	1.35959	12.364	0.0329	12.1187	6.1461	0.0141639	19.8001	0.232612	-0.032277	-0.048547	1.79841	-0.658066	0.12135	0.00580084	1.69151	2.19722	0.3333	0	0.347431	4.76482	0	3.43399	0.362399	0	0.0169195
17	2023	C	1	1	深圳市	0	0	3	3	68.61	1	59.9	2	64.57	5	76.59	0.95717	3.22496	-4.41436	-0.878713	0.0617906	0.0348096	4.23411	1.3905	12.725	0.0663	12.1819	6.30369	0.0131461	19.7281	0.163051	0.046955	0.058626	1.48249	0.0810783	0.221588	0.00619083	0.27817	2.19722	0.3333	0	0.349429	4.51667	0	3.46574	0.364257	0	0.0118954
19	2009	C	0	0	深圳市	0	0	3.75	4	73.12	1	52.87	4	70.68	7	85.09	0.729587	3.05471	-4.36202	-0.883333	#N/A	0.0314692	6.08677	0.930005	9.244	0	11.4379	3.48536	0.009652	20.2506	0.413914	-0.017078	-0.026361	0.318778	0.00275189	0.0696747	0.190321	0.218532	2.19722	0.3333	0	0.526569	2.11978	1	2.89037	0.5223	0	0.211011	0.0381551
19	2010	C	0	0	深圳市	0	0	4	4	70.38	1	52.87	3	67.77	6	81.08	0.779435	2.77803	-4.41195	-0.857033	0.0246879	0.0858908	6.41346	0.90881	9.835	0.0341	11.5795	3.54004	0.0104203	20.3054	0.433623	0.01402	0.024341	0.358547	0.00793206	0.080741	0.234819	0.247935	2.19722	0.3333	0	0.521443	2.9937	1	2.94444	0.504808	0	0.170395	0.0262196
19	2011	C	0	0	深圳市	0	0	4.25	5	75.88	1	56.03	5	76.01	7	85.91	0.803387	-0.09832	-4.52762	-0.894498	0.0109554	0.0338588	6.48158	0.931098	9.888	0.0154	11.6121	3.34599	0.0061263	20.7834	0.162047	0.01121	0.015273	0.369942	-0.0176938	0.0536584	0.142008	0.38483	2.19722	0.3333	0	0.549771	1.5603	1	2.99573	0.553775	0	0.149254	0.0298983
19	2012	C	0	0	深圳市	0	0	4.25	4	74.43	1	56.03	4	73.76	6	84.28	0.760429	-0.091519	-4.58621	-0.964274	0.0243145	0.018194	6.56808	0.985526	9.936	0.0468	11.7219	3.3371	0.00610993	20.9246	0.177289	0.064827	0.078125	0.272031	-0.0396032	0.166364	0.130842	-0.023379	2.19722	0.3333	0	0.511124	1.74472	1	3.04452	0.502204	0	0.204618	0.0276504
19	2013	C	0	0	深圳市	0.0121052	0	4	4	74.16	1	56.03	4	72.9	6	84.28	0.824173	1.19319	-4.63703	-0.929369	0.0467829	0.0168362	6.7093	1.03207	10.237	0.0194	11.7297	3.42302	0.00917099	21.0134	0.243113	0.035329	0.044814	0.342486	-0.00891628	0.228614	0.230594	0.410336	2.19722	0.3333	0	0.485506	1.55239	1	3.09104	0.46401	0	0.138315	0.0304323
19	2014	C	0	0	深圳市	0.0123018	0	4	4	72.58	1	56.03	3	67.51	6	84.45	0.851934	0.134202	-4.65884	-0.90856	0.0144218	0.021383	6.70196	1.03989	10.445	0.0314	11.915	3.44766	0.00591183	20.867	0.139418	0.012384	0.014089	0.322709	0.0220361	0.112628	0.344238	-0.160151	2.19722	0.3333	0	0.466337	2.01812	1	3.13549	0.48156	0	0.205541	0.0692356
19	2015	C	0	0	深圳市	0	0	3.75	4	70.28	1	56.03	1	59.1	7	85.09	0.854731	1.49015	-4.68742	-0.900976	#N/A	0.0207644	6.73815	1.10955	11.076	0.0448	11.9703	5.15504	0.0122448	20.782	0.0974302	-0.038789	-0.044045	0.305385	-0.0433426	0.165798	0.337984	-0.081215	2.19722	0.3333	0	0.405071	4.45204	1	3.17805	0.370348	0.0668	0.238053	0.0869759
19	2016	C	0	1	深圳市	0	0	3.25	3	69.59	1	54.45	2	62.8	6	81.9	0.810893	-0.100532	-4.7415	-0.96595	0.0687907	0.0192131	6.64509	1.2159	10.49	0.0818	12.0282	4.85968	0.0207014	20.8875	0.109292	0.080523	0.089837	0.244201	0.0523872	0.119598	0.282564	-0.19171	2.19722	0.3333	0	0.366625	5.60933	1	3.21888	0.359153	0.0676	0.315018	0.0820697
19	2018	C	0	1	深圳市	0	0	3	3	67.8	1	50.79	2	63	5	79.72	0.483183	0.804383	-4.91615	-2.20217	0.0497591	0.00522549	6.99942	1.32152	10.854	0.0519	12.1525	4.8295	0.0229123	22.5903	0.329474	0.051835	0.077218	1.73809	0.0462368	0.434661	0.153524	33.0724	2.19722	0.3333	0	0.727276	1.21406	1	3.29584	0.7253	0.0257	0.0229156	0.027961
19	2019	F	0	1	深圳市	0	0	4	4	74.36	1	46.26	9	100	5	77.95	0.409664	0.700286	-4.95524	-1.05117	0.0344579	0.00380198	7.08087	1.38968	11.342	0.0787	12.2234	5.034	0.0203671	22.6365	0.31758	0.058066	0.08582	1.67019	0.0280519	0.45235	0.139488	0.027996	2.19722	0.3333	0	0.727779	1.11935	1	3.3322	0.72216	0.0088	0.0235708	0.0050482
19	2020	F	0	1	深圳市	0	0	4	4	73.84	1	46.26	9	95.12	5	78.64	0.459585	0.481086	-4.99336	-1.05933	0.0374876	0.00309616	7.12769	1.42588	11.673	0.0643	11.9786	5.71698	0.012166	22.7124	0.34396	0.057336	0.085738	1.68761	0.0392	0.467663	0.153596	0.074552	2.19722	0.3333	0	0.732365	1.1838	1	3.3673	0.729079	0	0.0239878	0.0053075
19	2021	F	0	1	深圳市	0.0638927	0	4	4	71.65	1	59.07	5	76.64	6	81.25	0.422811	0.347613	-5.0319	-1.04153	0.0325758	0.00422157	7.15305	1.36837	12.014	0.0511	12.0649	5.91092	0.0124654	22.7605	0.387596	0.058256	0.091931	1.35384	0.0574208	0.451211	0.277436	-0.146827	2.19722	0.3333	0	0.732268	1.14895	1	3.4012	0.722543	0	0.0296596	0.0114365
19	2022	F	0	1	深圳市	0.0708411	0	4	4	72.44	1	59.07	4	74.14	7	85.08	0.67692	0.6323	-5.07284	-1.06108	0.0276808	0.00442262	7.11964	1.35959	12.364	0.0329	12.1187	6.1461	0.0141639	22.7303	0.350589	0.055364	0.087791	1.10022	0.0714776	0.483655	0.287762	-0.18017	1.79176	0.5	0	0.735901	1.17905	1	3.43399	0.731882	0	0.0337504
19	2023	F	0	1	深圳市	0.0884302	0	3.75	3	69.78	1	59.07	4	70.39	6	80.4	0.470676	0.464202	-5.11301	-1.05904	0.0765024	0.00393696	7.1025	1.3905	12.725	0.0663	12.1819	6.30369	0.0131461	22.7245	0.340725	0.046716	0.071395	0.834232	0.0791802	0.46745	0.293568	-0.255358	2.19722	0.3333	0	0.737262	1.17696	1	3.46574	0.739758	0	0.034407
20	2009	C	0	0	深圳市	0	0	4.75	5	76.9	2	63.1	5	75.89	6	84.63	0.665915	6.64363	-4.11601	-0.937436	0.0167651	0.130211	6.97635	0.930005	9.244	0	11.4379	3.48536	0.009652	20.4446	0.667058	0.006904	0.016626	0.844676	-0.131667	0.0616555	0.276809	1.68352	1.79176	0.5	1	0.532845	2.25017	0	2.89037	0.5261	0	0.0584563	0.0170093
20	2010	C	0	0	深圳市	0	0	3.5	3	69.87	2	61.52	1	55.53	6	83.81	0.791933	2.3627	-4.14898	-0.864893	0.0356558	0.0237404	6.98286	0.90881	9.835	0.0341	11.5795	3.54004	0.0104203	20.4029	0.632778	0.012379	0.035397	1.00572	0.078248	0.102604	0.281892	0.466919	1.94591	0.4286	1	0.527227	2.13249	0	2.94444	0.5211	0	0.0429245	0.0187014
20	2011	C	0	0	深圳市	0	0	3	3	67.75	1	49.35	2	62.58	6	80.64	0.656656	3.65706	-4.17462	-0.877721	0.0389192	0.0149177	6.91175	0.931098	9.888	0.0154	11.6121	3.34599	0.0061263	20.3204	0.58566	0.014882	0.038176	1.25625	0.0720706	0.0836755	0.310555	0.174627	1.94591	0.4286	1	0.526737	1.54565	0	2.99573	0.521836	0	0.042943	0.234157
20	2012	C	0	0	深圳市	0.00215839	0	2.5	2	63.74	1	54.3	1	55.39	4	74.2	0.690024	4.34197	-4.21809	-0.883893	0.011705	0.01403	6.96602	0.985526	9.936	0.0468	11.7219	3.3371	0.00610993	20.34	0.588963	0.004803	0.011638	1.07241	0.0270215	0.0627468	0.297432	-0.173431	1.94591	0.4286	1	0.528787	1.73404	0	3.04452	0.5163	0	0.06295	0.233427
20	2013	C	0	0	深圳市	0.00829324	0	2.75	3	65.63	1	54.3	2	62.45	4	73.56	0.697929	4.8683	-4.27025	-0.868009	#N/A	0.0131589	6.95368	1.03207	10.237	0.0194	11.7297	3.42302	0.00917099	20.4104	0.625809	-0.009225	-0.023535	0.887224	-0.0948295	0.064428	0.267372	-0.134095	1.94591	0.4286	1	0.525608	1.75043	0	3.09104	0.52085	0	0.0626023	0.226524
20	2015	C	1	0	深圳市	0.00667619	0	2.75	3	68.52	1	50.93	3	65.07	5	79.82	0.290256	0.051819	-4.41888	-0.910801	#N/A	0.00806254	6.71052	1.10955	11.076	0.0448	11.9703	5.15504	0.0122448	20.8674	0.72819	-0.003625	-0.014114	0.430987	0.150206	0.0234912	0.0957649	-0.281193	1.94591	0.4286	1	0.535357	6.16779	0	3.17805	0.534962	0	0.0854759	0.0098465
20	2016	C	1	1	深圳市	0.0057869	0	2	1	54.76	1	50.93	1	59.92	1	53.22	0.462202	5.27184	-4.36468	-0.879538	0.0173687	0.0062206	6.84694	1.2159	10.49	0.0818	12.0282	4.85968	0.0207014	20.2652	0.494528	0.006107	0.017227	0.692789	-0.0295558	0.0741568	0.128929	0.239685	1.79176	0.5	1	0.53964	7.9148	0	3.21888	0.534001	0	0.0811759	0.0126571
20	2017	C	1	1	深圳市	0.00484488	0	1	1	57.32	1	52.31	3	68.24	1	52.5	0.682742	5.28858	-4.40389	0	0.00304892	0.0068847	6.90073	1.28451	10.61	0.0391	12.1202	4.69248	0.0156436	20.2609	0.490804	0.001544	0.003043	1.35955	0.0186154	0.0958885	0.13278	0.385796	1.79176	0.5	1	0.540005	5.32493	0	3.2581	0.5401	0	0.0498614	0.0197812
20	2018	C	1	1	深圳市	0.00382471	0	2	2	61.56	1	47.54	3	65.89	3	65.79	0.800829	6.97466	-4.44016	0	0.0102747	0.00936197	6.92363	1.32152	10.854	0.0519	12.1525	4.8295	0.0229123	20.2405	0.475007	0.005285	0.010223	1.02185	-0.0354802	0.10205	0.304792	-0.257556	1.79176	0.5	1	0.547925	4.22217	0	3.29584	0.548	0	0.060459	0.0106732
20	2019	C	1	1	深圳市	0.0667408	0	2	2	61.97	1	47.15	2	63.54	3	68.49	0.926762	3.63597	-4.47928	-0.89586	0.0168536	0.0103415	6.90575	1.38968	11.342	0.0787	12.2234	5.034	0.0203671	20.2358	0.463615	0.008869	0.016713	1.17207	0.121244	0.109045	0.322764	0.13266	1.79176	0.5	1	0.556394	4.23141	0	3.3322	0.556878	0.9994	0.0527111	0.0099095
20	2020	C	1	1	深圳市	0.0530444	0	2	2	64.39	1	47.15	2	61.18	5	75.36	0.936353	2.54066	-4.52332	-0.883842	0.0207343	0.00711547	7.03174	1.42588	11.673	0.0643	11.9786	5.71698	0.012166	20.2577	0.464384	0.010999	0.020521	1.11397	0.0951278	0.111769	0.308397	-0.041321	1.79176	0.5	1	0.53735	3.76436	0	3.3673	0.5474	0.9994	0.0498469	0.0101889
20	2021	C	1	1	深圳市	0.05008	0	3.75	4	70.31	3	67.11	3	68.37	4	73.37	0.921094	4.22579	-4.57235	-0.867198	0.021419	0.0068498	7.03262	1.36837	12.014	0.0511	12.0649	5.91092	0.0124654	20.3076	0.479568	0.011186	0.021191	1.1891	-0.0186743	0.137265	0.28471	0.106787	1.79176	0.5	1	0.53735	3.36948	0	3.4012	0.543469	0.9994	0.0541852	0.0248417
20	2022	C	1	1	深圳市	0.0423118	0	4	4	71.54	3	67.11	3	68.97	5	75.69	0.91716	2.94678	-4.59767	-0.886368	0.0294889	0.00861978	5.94803	1.35959	12.364	0.0329	12.1187	6.1461	0.0141639	20.227	0.419243	0.015965	0.02906	1.04738	0.135329	0.109139	0.280776	-0.132151	1.94591	0.4286	1	0.53735	3.49253	0	3.43399	0.548327	0.9994	0.0481289
20	2023	C	1	1	深圳市	0.0368604	0	3	3	65.08	2	64.19	3	66.87	2	64.26	0.904063	2.69236	-4.62543	0	0.0377348	0.00765465	6.18621	1.3905	12.725	0.0663	12.1819	6.30369	0.0131461	20.1621	0.356894	0.022626	0.037036	1.23208	0.201624	0.12062	0.275009	0.093472	1.94591	0.4286	1	0.549459	4.91766	0	3.46574	0.578752	0.9994	0.0428706
21	2009	C	0	0	深圳市	0	0	4	4	74.24	1	55.88	4	70.82	7	85.91	0.403608	-1.01218	-4.11792	-1.0522	0.0233077	0.00786546	9.54359	0.930005	9.244	0	11.4379	3.48536	0.009652	22.4149	0.271815	0.051364	0.068403	2.58917	0.0909478	0.0793075	0.240783	-0.038858	2.19722	0.3333	1	0.611755	2.35889	1	2.83321	0.71703	0.1398	0.0146604	0.0154222
21	2010	C	0	0	深圳市	0	0	4.25	5	75.25	2	62.93	3	69.96	7	85.09	0.188777	-0.629222	-4.15558	-1.02771	0.0366786	0.0035451	9.76933	0.90881	9.835	0.0341	11.5795	3.54004	0.0104203	22.6204	0.328237	0.058925	0.08453	3.43478	0.0171654	0.0972359	0.200577	0.549501	2.19722	0.3333	0	0.612948	2.6498	1	2.89037	0.703942	0.1398	0.0115408	0.0144267
21	2011	C	0	0	深圳市	0	0	4.75	5	79.39	4	70.5	5	76.81	7	85.66	0.163534	0.345017	-4.17844	-1.05129	0.0208421	0.0079921	9.83564	0.931098	9.888	0.0154	11.6121	3.34599	0.0061263	23.059	0.582013	0.025894	0.050038	2.19139	0.0164534	0.0785916	0.143165	-0.103081	2.19722	0.3333	0	0.594587	1.23651	1	2.94444	0.629427	0.1398	0.0160305	0.225862
21	2012	C	0	0	深圳市	0	0	5	5	79.66	4	70.5	5	78.92	6	84.84	0.138609	1.95123	-4.21931	-1.0719	-0.00429305	0.00813927	9.75725	0.985526	9.936	0.0468	11.7219	3.3371	0.00610993	23.0438	0.59178	0.000824	0.001994	1.59854	0.028272	0.0725933	0.123528	-0.119743	2.19722	0.3333	0	0.596126	1.20187	1	2.99573	0.640387	0.146	0.0186443	0.223399
21	2013	C	0	0	深圳市	0	0	5	5	77.69	3	67.13	4	71.01	7	87.6	0.065887	-1.42305	-4.23855	-1.07709	0.0174972	0.0086738	9.60784	1.03207	10.237	0.0194	11.7297	3.42302	0.00917099	23.3426	0.638573	0.013291	0.034851	1.25812	0.0326994	0.0385404	0.0892309	-0.082928	2.19722	0.3333	0	0.578016	1.18318	1	3.04452	0.635351	0.131	0.0236764	0.219405
21	2014	C	1	0	深圳市	0	0	5	5	76.44	3	65.34	4	72.38	6	84.84	0.102249	0.034269	-4.27421	-1.0862	0.017497	0.00344766	9.7703	1.03989	10.445	0.0314	11.915	3.44766	0.00591183	23.394	0.649905	0.011396	0.032047	1.16721	-0.00685736	0.0481939	0.0968815	0.093396	2.19722	0.3333	0	0.55552	1.38056	1	3.09104	0.585416	0.131	0.0203263	0.0171154
21	2015	C	1	0	深圳市	0.0120173	0	5.75	6	80.33	3	65.34	7	85	6	84.84	0.096765	-0.199621	-4.31489	-1.0907	0.0210047	0.00594958	9.92701	1.10955	11.076	0.0448	11.9703	5.15504	0.0122448	23.3861	0.636919	0.012551	0.0352	1.06724	0.0342082	0.0580045	0.147513	-0.06582	2.19722	0.3333	0	0.553144	1.87361	1	3.13549	0.577115	0.131	0.0262156	0.0221746
21	2016	C	1	1	深圳市	0.0147008	0	6	6	81.37	4	71.37	7	85	6	84.02	0.165601	1.46556	-4.3705	-1.06638	0.0291777	0.00362668	10.5129	1.2159	10.49	0.0818	12.0282	4.85968	0.0207014	23.1843	0.547908	0.017175	0.042605	1.15673	0.0304282	0.087043	0.216667	-0.01905	2.19722	0.3333	0	0.544289	1.73124	1	3.17805	0.558612	0.1305	0.0330371	0.0109383
21	2017	C	1	1	深圳市	0.00654552	0	6	6	81.92	3	65.42	8	91.31	6	84.02	0.093081	-0.556891	-4.38135	0	0.092168	0.00439864	10.1116	1.28451	10.61	0.0391	12.1202	4.69248	0.0156436	23.5326	0.642835	0.040534	0.102243	1.00363	0.0433551	0.0992859	0.146887	-0.05703	2.19722	0.3333	0	0.543298	1.50459	1	3.21888	0.543651	0.1683	0.0358673	0.0018418
21	2018	C	1	1	深圳市	0.00606202	0	5.25	5	77.07	2	64.05	5	79.87	6	81.83	0.09839	0.544494	-4.42768	0	0.0679374	0.00928878	9.99762	1.32152	10.854	0.0519	12.1525	4.8295	0.0229123	23.4957	0.576803	0.034689	0.089045	0.985449	0.0263034	0.137243	0.16049	0.130278	2.19722	0.3333	0	0.546246	1.1055	1	3.2581	0.549165	0.1642	0.0257474	0.014308
21	2019	C	1	1	深圳市	0.00635948	0	5	5	77.44	3	65.63	5	79.87	6	81.83	0.150766	2.94533	-4.45042	0	0.0523944	0.0234545	10.2981	1.38968	11.342	0.0787	12.2234	5.034	0.0203671	23.6385	0.615132	0.025652	0.063705	0.767707	-0.0541997	0.12265	0.147366	-0.176651	2.19722	0.3333	0	0.53945	1.58546	1	3.29584	0.530886	0.1642	0.0332007	0.0146824
21	2020	C	1	1	深圳市	0.00948617	0	5.75	6	82.6	4	71.18	7	88.28	6	84.59	0.130764	-0.388358	-4.47219	-1.11238	0.0984166	0.00709992	10.2055	1.42588	11.673	0.0643	11.9786	5.71698	0.012166	23.7976	0.629761	0.04755	0.126136	0.746719	0.144328	0.109424	0.154899	0.131839	2.07944	0.375	0	0.48826	1.92216	1	3.3322	0.48664	0.0493	0.0316537	0.0165537
21	2021	C	1	1	深圳市	0.0187414	0	5.25	5	77.58	3	67.92	5	78.58	6	82.14	0.102948	0.915431	-4.48292	-1.09651	0.0551751	0.0320365	10.2005	1.36837	12.014	0.0511	12.0649	5.91092	0.0124654	24.0209	0.575808	0.034265	0.085616	0.677365	0.0320754	0.131077	0.15746	0.101623	2.19722	0.3333	0	0.448646	1.48952	1	3.3673	0.473765	0.0478	0.0380963	0.0276834
21	2022	C	1	1	深圳市	0.0176442	0	5	5	77.3	3	68.39	5	78.82	6	80.98	0.048104	1.64472	-4.51897	-1.11116	0.0423395	0.0017419	9.78521	1.35959	12.364	0.0329	12.1187	6.1461	0.0141639	24.0488	0.569897	0.02511	0.058779	0.587599	0.0322043	0.162618	0.151625	-0.022433	2.19722	0.3333	0	0.440302	1.16965	1	3.4012	0.464092	0.0439	0.0352975
21	2023	C	1	1	深圳市	0.025426	0	5	5	78.49	3	68.85	5	79.59	6	82.96	0.125995	1.42176	-4.56119	-1.11461	0.068948	0.00154881	9.75505	1.3905	12.725	0.0663	12.1819	6.30369	0.0131461	24.0332	0.53323	0.029872	0.066635	0.516876	0.0731205	0.128763	0.177246	-0.115007	2.19722	0.3333	0	0.432453	1.45689	1	3.43399	0.520927	0.0247	0.0401031
23	2009	E	0	0	深圳市	0	0	3	3	68.88	1	48.59	4	72.45	5	76.83	0.648001	3.74287	-4.04932	-0.881684	0.0615523	0.0079096	7.00941	0.930005	9.244	0	11.4379	3.48536	0.009652	20.7958	0.708031	0.023841	0.07934	0.761224	0.0809719	0.366101	0.135445	0.45431	2.19722	0.3333	0	0.513422	1.64378	0	3.2581	0.495	0.0077	0.0652714	0.0118709
23	2010	E	0	0	深圳市	0	0	3	3	68.26	1	56.78	2	63.96	5	77.01	0.753216	2.20189	-4.06994	-0.890082	0.0428895	0.0133466	7.12125	0.90881	9.835	0.0341	11.5795	3.54004	0.0104203	20.6598	0.661815	0.012985	0.041572	0.914866	0.135047	0.224843	0.130937	0.178794	2.19722	0.3333	0	0.478223	1.6475	0	3.29584	0.4612	0.0012	0.0613546	0.0227459
23	2011	E	0	0	深圳市	0	0	3.75	4	70.91	1	45.76	5	76.17	6	80.21	0.474216	3.9555	-4.13162	-0.941687	0.0145091	0.0114592	7.10497	0.931098	9.888	0.0154	11.6121	3.34599	0.0061263	20.8127	0.684301	0.008956	0.027467	0.787512	0.0354792	0.155739	0.110524	-0.129909	2.19722	0.3333	0	0.476861	1.3105	0	3.3322	0.4754	0.0012	0.0711071	0.0170469
23	2012	C	0	0	深圳市	0.0804908	0	3.25	3	67.58	1	58.7	3	66.67	4	72.74	0.592315	4.92809	-4.18581	-0.97653	0.00238262	0.0091178	7.15774	0.985526	9.936	0.0468	11.7219	3.3371	0.00610993	20.9213	0.665814	0.004437	0.013635	0.759269	-0.0662435	0.200066	0.100228	0.097233	2.19722	0.3333	0	0.465184	1.30908	0	3.3673	0.4612	0.0012	0.0768871	0.261358
23	2013	C	0	0	深圳市	0.310752	0	2.25	2	64.7	1	45.76	3	68.66	4	71.69	0.491624	2.96489	-4.23776	-0.984345	0.0153443	0.00834733	7.11721	1.03207	10.237	0.0194	11.7297	3.42302	0.00917099	21.0196	0.691395	0.009222	0.02875	0.834287	0.0217842	0.28256	0.0912143	0.218224	2.19722	0.3333	0	0.473057	1.50438	0	3.4012	0.4645	0.0002	0.0742396	0.256191
23	2014	C	0	0	深圳市	0	0	2.75	3	67.84	1	52.51	4	70.47	4	73.89	0.495267	3.58199	-4.28816	-0.982091	0.0229285	0.00778293	7.12448	1.03989	10.445	0.0314	11.915	3.44766	0.00591183	21.1112	0.711966	0.010689	0.035889	0.775018	-0.0169674	0.289001	0.0834965	0.021333	2.19722	0.3333	0	0.490434	2.20872	0	3.43399	0.4204	0.0002	0.0646318	0.258989
23	2016	C	0	1	深圳市	0	0	1	1	57.61	1	48.92	4	70.68	1	53.22	0.489634	3.29261	-4.37106	-0.976643	0.0230797	0.0164728	7.0639	1.2159	10.49	0.0818	12.0282	4.85968	0.0207014	21.138	0.699066	0.010279	0.03509	0.655854	0.046891	0.260363	0.0594836	-0.026829	2.19722	0.3333	0	0.459301	3.61081	0	3.49651	0.552546	0	0.0625528	0.0100147
23	2017	C	0	1	深圳市	0	0	2	2	63.04	1	53.89	3	65.75	3	65.88	0.466624	1.42578	-4.43553	-0.997755	0.0475909	0.0104999	7.02376	1.28451	10.61	0.0391	12.1202	4.69248	0.0156436	21.3919	0.754666	0.016556	0.061406	0.709368	0.127575	0.256464	0.0708047	0.217065	2.07944	0.375	0	0.423886	2.21431	0	3.52636	0.521731	0	0.060465	0.0137841
23	2018	C	0	1	深圳市	0	0	3	3	67.01	1	57.26	3	68.1	4	71.26	0.61463	2.38608	-4.48903	-1.00859	0.0558392	0.0178282	6.9921	1.32152	10.854	0.0519	12.1525	4.8295	0.0229123	21.565	0.781529	0.016449	0.071288	0.754347	0.0519817	0.225986	0.0612637	0.310888	2.07944	0.375	0	0.423814	1.54154	0	3.55535	0.431515	0	0.0544001	0.0150841
23	2019	C	1	1	深圳市	0	0	2.75	2	61.12	1	58.51	2	62.94	2	61.24	0.731694	2.73983	-4.53454	-1.01588	0.14301	0.0201301	6.98472	1.38968	11.342	0.0787	12.2234	5.034	0.0203671	21.6473	0.767842	0.030814	0.13659	0.756435	0.0476157	0.127458	0.0696193	0.136042	2.19722	0.3333	1	0.437863	1.48492	0	3.58352	0.427471	0	0.0528453	0.0194505
23	2020	C	1	1	深圳市	0	0	2	2	63.54	2	63.46	2	62.94	2	63.98	0.727768	3.37654	-4.56926	0	0.0383113	0.0234264	6.89163	1.42588	11.673	0.0643	11.9786	5.71698	0.012166	21.5683	0.739688	0.009226	0.037553	0.735714	0.038118	0.0967433	0.0631956	-0.025868	2.19722	0.3333	1	0.517147	1.71118	0	3.61092	0.532303	0.0001	0.0366629	0.0851862
23	2021	C	1	1	深圳市	0.444062	0	2.75	3	68.04	2	61.85	5	75.77	4	70.17	0.727447	3.28369	-4.60392	-0.91697	#N/A	0.0198328	6.92854	1.36837	12.014	0.0511	12.0649	5.91092	0.0124654	21.4956	0.741732	-0.011647	-0.044914	0.658763	0.0655857	0.0595638	0.0651866	-0.170093	2.19722	0.3333	1	0.538406	1.6128	0	3.63759	0.552021	0	0.055665	0.07577
23	2022	C	1	1	深圳市	0.0285953	0	3	3	66.25	2	61.85	4	74.22	3	66.12	0.291038	6.3484	-4.61109	-0.886972	#N/A	0.114007	6.30079	1.35959	12.364	0.0329	12.1187	6.1461	0.0141639	21.1382	0.835406	-0.154161	-0.701647	0.197352	-0.0727549	0.0783697	0.0547266	-0.754684	2.19722	0.3333	1	0.431161	2.09714	0	3.66356	0.417953	0	0.303949
25	2009	S	0	0	深圳市	0.712375	0	4	4	72.66	1	55.34	5	75.58	5	79.11	0.458152	6.39519	-3.87847	-0.883184	0.0434514	0.0364261	6.57786	0.930005	9.244	0	11.4379	3.48536	0.009652	20.2314	0.680975	0.013252	0.042524	0.705816	0.0432964	0.0300481	0.297757	-0.321714	2.19722	0.3333	0	0.675603	4.20681	1	2.83321	0.6643	0	0.116757	0.0360462
25	2010	F	0	0	深圳市	0.748385	0	4	4	73.09	1	53.35	6	80.46	5	79.11	0.70827	3.96225	-3.91481	-0.840257	0.020024	0.0229222	6.48158	0.90881	9.835	0.0341	11.5795	3.54004	0.0104203	20.2117	0.666757	0.006478	0.019866	0.638042	0.0119155	0.0417742	0.289215	-0.107073	2.07944	0.375	0	0.670327	3.67262	1	2.89037	0.6643	0	0.119622	0.0097563
25	2011	F	0	0	深圳市	0.705921	0	4	4	71.9	1	55.34	6	80.46	5	76.17	0.304301	6.65908	-3.94548	-0.844112	0.00624677	0.0193509	6.39526	0.931098	9.888	0.0154	11.6121	3.34599	0.0061263	20.1624	0.647128	0.002137	0.006233	0.689224	-0.0258259	0.0529502	0.288436	0.04383	2.19722	0.3333	0	0.680717	2.5733	1	2.94444	0.673976	0	0.110712	0.015204
25	2012	F	0	0	深圳市	0.617642	0	4	4	70.92	1	55.34	6	80.46	4	74.44	0.147375	6.75733	-4.00821	-0.87526	0.00485728	0.0190632	6.35957	0.985526	9.936	0.0468	11.7219	3.3371	0.00610993	20.2846	0.688234	0.001599	0.00483	0.690426	-0.0120271	0.0741402	0.241989	0.040569	2.19722	0.3333	0	0.671953	2.52887	1	2.99573	0.6645	0	0.108272	0.0073511
25	2013	F	0	0	深圳市	0	0	4	4	73.97	1	55.25	7	85.35	5	78.24	0.169194	5.11204	-4.06298	-0.884814	0.0150386	0.0114528	6.35957	1.03207	10.237	0.0194	11.7297	3.42302	0.00917099	20.368	0.709393	0.004485	0.014912	0.723272	-0.00375127	0.0896242	0.213936	0.159866	2.19722	0.3333	0	0.691805	3.15196	1	3.04452	0.6786	0	0.0908677	0.0043172
25	2014	F	0	0	深圳市	0.00624773	0	4	4	74.75	1	57.23	7	85.35	5	78.76	0.277692	4.30398	-4.12642	-0.896929	0.0442083	0.00980374	6.2672	1.03989	10.445	0.0314	11.915	3.44766	0.00591183	20.508	0.749071	0.011357	0.043162	0.616488	0.00770745	0.0597886	0.177161	-0.044669	2.19722	0.3333	0	0.682529	3.1684	1	3.09104	0.681068	0	0.093571	0.0093913
25	2015	F	0	0	深圳市	0.00987005	0	4	4	72.94	1	49.47	6	80.46	6	80.49	0.441173	2.87876	-4.22042	-0.896785	0.0511311	0.00952195	6.24804	1.10955	11.076	0.0448	11.9703	5.15504	0.0122448	20.8791	0.248214	0.043279	0.079077	0.307573	0.0690381	0.0138203	0.116871	-0.346807	2.19722	0.3333	0	0.758284	13.8027	1	3.13549	0.757931	0	0.108261	0.0161478
25	2016	F	0	1	深圳市	0.00952125	0	3	3	68.58	1	49.47	7	85.35	4	71.25	0.36621	3.85532	-4.26264	-0.910744	0.0313512	0.0139499	6.20254	1.2159	10.49	0.0818	12.0282	4.85968	0.0207014	20.8964	0.235883	0.023428	0.030908	0.275052	0.0486753	0.00928419	0.108685	0.067541	2.19722	0.3333	0	0.74873	9.71361	1	3.17805	0.747723	0	0.130911	0.0232566
25	2017	F	0	1	深圳市	0.00664047	0	4	4	72.69	1	53.92	7	85.35	5	76.56	0.552473	4.81668	-4.32268	-0.892689	0.070563	0.0105601	5.76832	1.28451	10.61	0.0391	12.1202	4.69248	0.0156436	21.0621	0.28881	0.050751	0.069006	0.267897	-0.00149152	0.00901168	0.0857233	0.070924	2.19722	0.3333	0	0.738177	5.94892	1	3.21888	0.735574	0	0.105793	0.0670603
25	2018	F	0	1	深圳市	0.0039972	0	4	4	71.11	1	50.04	5	75.58	5	78.64	0.44442	5.9878	-4.38047	-0.929229	0.0850228	0.00873379	5.82008	1.32152	10.854	0.0519	12.1525	4.8295	0.0229123	21.2291	0.337101	0.056271	0.082143	0.270602	-0.0039649	0.0074431	0.0679457	0.192956	2.07944	0.375	0	0.718726	4.76551	1	3.2581	0.717745	0	0.106777	0.0720455
25	2019	F	0	1	深圳市	0.0113509	0	4	4	74.3	1	48.15	9	95.12	5	78.64	0.677122	2.20267	-4.41972	-1.00558	0.176285	0.0272871	5.78383	1.38968	11.342	0.0787	12.2234	5.034	0.0203671	21.2215	0.186276	0.132447	0.179461	0.345678	0.0479476	0.0129966	0.0650875	0.378608	2.19722	0.3333	0	0.678704	5.36146	1	3.29584	0.683154	0	0.0764671	0.0712443
25	2020	F	0	1	深圳市	0.052746	0	4	4	74.69	1	54.01	7	85.35	6	80.03	0.718282	0.482331	-4.4634	-0.988303	0.038774	0.0171324	5.71043	1.42588	11.673	0.0643	11.9786	5.71698	0.012166	21.2588	0.189527	0.035958	0.044279	0.253065	0.0638624	0.0129239	0.0697342	-0.256804	2.19722	0.3333	0	0.64743	4.16034	1	3.3322	0.65441	0	0.0942093	0.0188233
25	2021	F	0	1	深圳市	0.0356223	0	4	4	72.77	2	63.3	4	70.99	5	78.18	0.74519	-0.049377	-4.51131	-0.993426	0.0907814	0.00272792	5.69709	1.36837	12.014	0.0511	12.0649	5.91092	0.0124654	21.3437	0.216415	0.074019	0.092935	0.285038	0.0680838	0.0136773	0.058849	0.198155	2.19722	0.3333	0	0.62823	3.44581	1	3.3673	0.629824	0	0.0927226	0.0224344
25	2022	F	0	1	深圳市	0.0615926	0	4	4	72.81	2	63.3	4	71.33	5	78.02	0.597062	2.49768	-4.56622	-1.02722	0.0436364	0.00343346	5.7589	1.35959	12.364	0.0329	12.1187	6.1461	0.0141639	21.5262	0.257972	0.039749	0.052238	0.409444	-0.0232828	0.0520019	0.0460073	0.647243	2.19722	0.3333	0	0.573716	3.33965	1	3.4012	0.576125	0	0.0562017
25	2023	F	0	1	深圳市	0.697968	0	4	4	71.77	2	63.3	4	73.01	4	74.54	0.692243	3.43174	-4.61147	-1.05071	0.0688055	0.00515153	5.01728	1.3905	12.725	0.0663	12.1819	6.30369	0.0131461	21.6003	0.279876	0.048077	0.065799	0.796716	-0.0250182	0.074225	0.0328372	1.20465	2.07944	0.375	0	0.555151	2.92986	1	3.43399	0.558166	0	0.0463638
26	2009	C	0	0	深圳市	0.129224	0	6	6	80.3	1	56.31	9	100	6	84.09	0.697058	2.5677	-3.97177	-0.997921	0.0664618	0.011673	7.77444	0.930005	9.244	0	11.4379	3.48536	0.009652	21.1446	0.517553	0.047722	0.100021	0.834635	0.0544777	0.499484	0.170455	0.138983	2.19722	0.3333	0	0.512765	1.63616	1	2.83321	0.55423	0.0142	0.0885407	0.0187555
26	2010	F	0	0	深圳市	0.0916609	0	6	6	80.98	1	56.31	9	95.12	7	86.88	0.573946	0.399414	-4.05237	-0.980126	0.0539977	0.0112416	8.09132	0.90881	9.835	0.0341	11.5795	3.54004	0.0104203	21.6138	0.471559	0.047478	0.092959	0.899263	-0.0404203	0.430279	0.10332	0.439112	2.19722	0.3333	0	0.500104	1.55778	1	2.89037	0.624405	0.0169	0.0818066	0.016599
26	2011	F	0	0	深圳市	0.0489592	0	5.25	5	79.82	1	54.32	9	100	6	84.09	0.527263	5.54229	-4.10254	-0.980762	0.0941945	0.0113679	8.38936	0.931098	9.888	0.0154	11.6121	3.34599	0.0061263	21.7865	0.518694	0.059734	0.118792	0.960579	-0.14141	0.566655	0.056167	0.438185	2.19722	0.3333	0	0.521346	1.48763	1	2.94444	0.706408	0.0169	0.0766608	0.0023181
26	2012	F	0	0	深圳市	0.0463431	0	5	5	75.65	1	47.67	9	100	5	79.61	0.543295	3.77064	-4.14886	-1.02148	0.0556446	0.0100258	8.52059	0.985526	9.936	0.0468	11.7219	3.3371	0.00610993	21.9253	0.564416	0.03621	0.080384	0.94671	0.0137812	0.566095	0.0955287	0.180749	2.19722	0.3333	0	0.486451	1.23596	1	2.99573	0.602013	0.0169	0.0639574	0.004401
26	2013	F	0	0	深圳市	0.0525301	0	5	5	76.88	1	47.67	9	100	6	81.77	0.582729	2.65833	-4.19133	-1.01694	0.0627425	0.0113627	8.53935	1.03207	10.237	0.0194	11.7297	3.42302	0.00917099	21.9927	0.56759	0.037797	0.087101	0.901463	0.0222124	0.596662	0.0862362	0.026301	2.07944	0.375	0	0.475291	1.34069	1	3.04452	0.500125	0.0169	0.0600278	0.0092644
26	2014	F	0	0	深圳市	0.0564435	0	5	5	75.32	1	45.69	8	90.23	6	83.1	0.645414	1.75956	-4.23223	-1.0374	0.0698372	0.0113527	8.62047	1.03989	10.445	0.0314	11.915	3.44766	0.00591183	22.0201	0.552603	0.040492	0.092025	0.908515	0.0790615	0.583357	0.0885052	0.056274	2.19722	0.3333	0	0.450892	1.56319	1	3.09104	0.475567	0.0169	0.0635885	0.01047
26	2015	F	0	0	深圳市	0.100849	0	5	5	75.59	1	49.57	9	95.12	6	80.31	0.632874	-0.147106	-4.27595	-1.02649	0.035138	0.00938329	8.62371	1.10955	11.076	0.0448	11.9703	5.15504	0.0122448	22.1694	0.457733	0.03088	0.061962	0.800105	0.0933053	0.492784	0.0852385	-0.03537	2.19722	0.3333	0	0.441168	1.80954	1	3.13549	0.444813	0.0169	0.0626393	0.0040773
26	2016	F	0	1	深圳市	0.173906	0	5	5	77.35	1	58.92	8	90.23	6	81	0.698004	0.621116	-4.31472	-1.02755	0.0288074	0.00833805	8.57376	1.2159	10.49	0.0818	12.0282	4.85968	0.0207014	22.1108	0.406989	0.026752	0.047191	0.725647	0.1138	0.498664	0.152614	-0.053233	2.19722	0.3333	0	0.433397	1.66699	1	3.17805	0.472269	0.0151	0.0672289	0.0052982
26	2017	F	0	1	深圳市	0.292914	0	5	5	75.04	1	57.6	7	85.35	5	79.11	0.724886	0.093168	-4.35153	-1.01219	0.0227371	0.00977447	8.58709	1.28451	10.61	0.0391	12.1202	4.69248	0.0156436	21.9986	0.310582	0.037606	0.058897	0.882254	0.157818	0.508557	0.146293	0.117555	2.19722	0.3333	0	0.446066	1.5725	1	3.21888	0.469988	0.1156	0.0717445	0.0138522
26	2018	F	0	1	深圳市	0.363094	0	4.25	4	73.21	1	46.26	8	90.23	5	79.15	0.712097	0.282116	-4.39171	-1.02836	0.0386879	0.0127429	8.54908	1.32152	10.854	0.0519	12.1525	4.8295	0.0229123	22.0041	0.286011	0.051211	0.072978	0.947269	0.0921267	0.495127	0.118246	0.016331	2.19722	0.3333	0	0.489574	1.10404	1	3.2581	0.433555	0.1156	0.064451	0.0214227
26	2019	F	0	1	深圳市	0.301345	0	4.5	5	75.95	1	56.92	7	85.35	6	81	0.598956	-0.384106	-4.43307	-1.03824	0.0503771	0.0125607	8.51599	1.38968	11.342	0.0787	12.2234	5.034	0.0203671	22.0479	0.294179	0.058666	0.08265	1.00649	0.118274	0.480951	0.096784	0.089329	2.19722	0.3333	0	0.413096	1.4759	1	3.29584	0.378867	0.2531	0.0649585	0.0346557
26	2020	F	0	1	深圳市	0.277922	0	5	5	75.95	1	56.92	7	85.35	6	81	0.649129	-1.02811	-4.4748	-1.04294	0.044494	0.0131641	8.49719	1.42588	11.673	0.0643	11.9786	5.71698	0.012166	22.1142	0.303269	0.075613	0.107846	1.09091	0.0941124	0.480696	0.087773	0.145572	2.19722	0.3333	0	0.426276	1.41871	1	3.3322	0.500173	0.2619	0.0604602	0.0235544
26	2021	F	0	1	深圳市	0.220593	0	4.25	4	70.97	2	60.72	3	69.89	5	78.98	0.721782	-0.842211	-4.5153	-1.03631	0.0944517	0.0149744	8.53326	1.36837	12.014	0.0511	12.0649	5.91092	0.0124654	22.1368	0.266957	0.095423	0.133441	1.29008	0.133132	0.498749	0.0850234	0.235727	2.19722	0.3333	0	0.42308	1.40167	1	3.3673	0.444586	0.3802	0.0498932	0.0159102
26	2022	F	0	1	深圳市	0.219691	0	4	4	73.06	2	60.72	4	71.4	6	82.96	0.851176	-0.414244	-4.55534	-1.03943	0.0545612	0.0138246	8.37124	1.35959	12.364	0.0329	12.1187	6.1461	0.0141639	22.1384	0.238204	0.064825	0.086731	1.0584	0.11567	0.520099	0.0885635	-0.169657	2.19722	0.3333	0	0.455574	1.23482	1	3.4012	0.392523	0.3206	0.0503008
26	2023	F	0	1	深圳市	0.241559	0	4	4	71.92	2	60.72	3	69.27	6	81.73	0.689557	-2.1916	-4.59577	-1.05126	0.0527642	0.0137303	8.35185	1.3905	12.725	0.0663	12.1819	6.30369	0.0131461	22.1594	0.207041	0.080077	0.102988	1.0983	0.150419	0.499652	0.0846249	0.049515	2.19722	0.3333	0	0.462745	1.23919	1	3.43399	0.410147	0.1991	0.0449394
27	2009	D	0	0	深圳市	0	0	5.75	6	81.03	3	65.41	7	85.03	7	86.13	0.198328	1.08385	-3.66665	-1.1083	0.118112	0.00238124	4.91998	0.930005	9.244	0	11.4379	3.48536	0.009652	24.1328	0.481501	0.077726	0.157853	0.381948	0.100793	0.0306981	0.447045	0.070071	2.19722	0.3333	0	0.739263	1.12743	1	2.83321	0.763235	0	0.0315715	0.0261965
27	2010	D	0	0	深圳市	0	0	4.5	4	71.11	3	65.41	1	51.64	7	85.37	0.192872	1.0003	-3.71256	-1.09688	0.0929251	0.00283538	4.84419	0.90881	9.835	0.0341	11.5795	3.54004	0.0104203	24.093	0.435322	0.054482	0.100682	0.420255	0.0877614	0.0345908	0.477988	0.094483	2.19722	0.3333	0	0.738304	1.05431	1	2.89037	0.754219	0	0.0357936	0.0126394
27	2011	D	0	0	深圳市	0	0	4	4	71.6	3	66.78	1	52.28	7	85.37	0.142168	1.87371	-3.74045	-1.11728	0.0574004	0.00446986	8.17329	0.931098	9.888	0.0154	11.6121	3.34599	0.0061263	24.1735	0.462982	0.039051	0.070965	0.474983	0.100823	0.03982	0.452824	0.15422	2.19722	0.3333	0	0.741663	0.974652	1	2.94444	0.768298	0	0.0317547	0.0044409
27	2012	D	0	0	深圳市	0	0	4.75	5	77.81	3	65.41	5	75.05	7	85.37	0.145388	1.89531	-3.77632	-1.11452	0.0522991	0.0032468	8.13212	0.985526	9.936	0.0468	11.7219	3.3371	0.00610993	24.2002	0.457686	0.035588	0.06594	0.401717	0.0815396	0.0399166	0.41728	-0.108329	2.19722	0.3333	0	0.742169	0.946113	1	2.99573	0.766427	0	0.0380903	0.014259
27	2013	D	0	0	深圳市	0	0	4.5	4	74.34	2	64.05	3	69.6	6	82.07	0.108036	0.35083	-3.81137	-1.11921	0.0605669	0.00251869	8.15104	1.03207	10.237	0.0194	11.7297	3.42302	0.00917099	24.2316	0.435835	0.052823	0.09545	0.375674	0.0687104	0.0328057	0.41204	-0.037237	2.19722	0.3333	0	0.736257	0.953276	1	3.04452	0.743748	0	0.0440676	0.021238
27	2014	D	0	0	深圳市	0	0	4.75	5	77.04	3	65.41	4	73.65	6	84.61	0.13659	0.276224	-3.82817	-1.13884	0.0974551	0.00524534	8.22202	1.03989	10.445	0.0314	11.915	3.44766	0.00591183	24.3724	0.470503	0.065041	0.119207	0.348189	0.082987	0.032609	0.379115	0.012571	2.19722	0.3333	0	0.738617	1.08623	1	3.09104	0.751328	0	0.0401856	0.0266387
27	2015	D	0	0	深圳市	0	0	5	5	78.13	3	65.41	5	78.71	6	83.86	0.044714	-0.083788	-3.79036	-1.14668	0.0535857	0.00372346	8.47741	1.10955	11.076	0.0448	11.9703	5.15504	0.0122448	24.7849	0.571741	0.042643	0.091003	0.230652	0.0660505	0.022865	0.315423	-0.110032	2.19722	0.3333	0	0.760875	1.08757	1	3.13549	0.771503	0	0.0575798	0.0071374
27	2016	D	0	1	深圳市	0	0	5.25	4	70.82	3	66.78	1	53.38	6	83.1	0.029049	1.75204	-3.82057	-1.15186	0.0338097	0.00696253	8.58167	1.2159	10.49	0.0818	12.0282	4.85968	0.0207014	24.8319	0.592068	0.023655	0.05661	0.190333	0.0452305	0.0249714	0.334792	0.016903	2.19722	0.3333	0	0.760875	1.03957	1	3.17805	0.77525	0	0.0545014	0.0072019
27	2017	D	0	1	深圳市	0	0	3.5	4	73.38	3	65.41	3	65.67	6	81.75	0.024387	2.90474	-3.80801	-1.15346	0.0218188	0.0186431	8.67334	1.28451	10.61	0.0391	12.1202	4.69248	0.0156436	25.0701	0.679887	0.012239	0.034109	0.22515	0.0366028	0.0180791	0.393987	0.373538	2.19722	0.3333	0	0.762563	0.990965	1	3.21888	0.770463	0	0.0508551	0.0057743
27	2018	D	0	1	深圳市	0	0	4.75	5	77.99	3	65.22	5	79.67	6	83.1	0.014778	2.97942	-3.82528	-1.15801	0.0192156	0.0196183	8.80222	1.32152	10.854	0.0519	12.1525	4.8295	0.0229123	25.1668	0.676944	0.008828	0.027444	0.228304	0.0491227	0.0151941	0.407192	0.19179	2.19722	0.3333	0	0.769691	0.921597	1	3.2581	0.783236	0	0.0421714	0.0084213
27	2019	D	0	1	深圳市	0	0	5.25	6	81.05	3	65.22	8	90.36	6	83.1	0.029365	2.78977	-3.83546	-1.15886	0.0510399	0.0136803	8.84434	1.38968	11.342	0.0787	12.2234	5.034	0.0203671	25.2888	0.650566	0.020191	0.059905	0.229786	0.0541036	0.00982194	0.371899	0.12358	2.19722	0.3333	0	0.769691	0.90672	1	3.29584	0.7935	0	0.0476451	0.0134256
27	2020	D	0	1	深圳市	0	0	6	6	80.59	3	67.55	7	86.85	6	83.1	0.024199	2.08632	-3.83144	-1.17572	0.0780606	0.00718264	8.90707	1.42588	11.673	0.0643	11.9786	5.71698	0.012166	25.46	0.633063	0.040609	0.113138	0.194643	0.05429	0.00793331	0.309359	-0.017414	2.19722	0.3333	0	0.758463	0.88707	1	3.3322	0.771279	0	0.0714457	0.0074527
27	2021	D	0	1	深圳市	0	0	4.5	4	71.42	2	64.26	3	66.41	6	81.87	0.030827	2.66033	-3.83293	-1.17423	0.0264345	0.00904148	9.45783	1.36837	12.014	0.0511	12.0649	5.91092	0.0124654	25.6023	0.622932	0.017181	0.046141	0.257113	0.0327543	0.0119642	0.437597	0.543403	2.19722	0.3333	0	0.740019	0.915957	1	3.3673	0.749203	0	0.0477356	0.0140081
27	2022	D	0	1	深圳市	0	0	3.25	3	69.69	2	62.6	3	66.07	5	79.32	0.008271	2.63734	-3.85291	-1.1794	0.0344032	0.00553743	9.50241	1.35959	12.364	0.0329	12.1187	6.1461	0.0141639	25.6739	0.615472	0.018101	0.047474	0.27469	0.0681315	0.0110589	0.419747	0.188636	2.19722	0.3333	0	0.751456	0.829657	1	3.4012	0.765982	0	0.035964
27	2023	D	0	1	深圳市	0	0	5.5	6	81.9	5	79.43	7	85.02	6	82.94	0.032266	2.42734	-3.8692	-1.19211	0.0524827	0.00342351	9.40919	1.3905	12.725	0.0663	12.1819	6.30369	0.0131461	25.7567	0.636208	0.018891	0.050548	0.274862	0.0777403	0.00892886	0.375856	0.079408	1.94591	0.4286	0	0.758093	0.836162	1	3.43399	0.77609	0	0.040109
28	2009	C	0	0	深圳市	0.0288849	0	4.75	5	79.58	3	65.96	9	95.12	6	80.31	0.160126	4.75768	-4.19796	-1.06279	0.239097	0.00920522	8.1747	0.930005	9.244	0	11.4379	3.48536	0.009652	22.3783	0.832209	0.043201	0.254333	2.38601	0.0517523	0.172721	0.0800193	0.309746	2.19722	0.3333	0	0.4731	2.23379	1	2.83321	0.760743	0.0022	0.022456	0.0987001
28	2010	F	0	0	深圳市	0.0316734	0	3.75	4	72.22	1	52.34	5	75.58	5	79.61	0.341317	2.8898	-4.23657	-1.02466	0.254658	0.00683565	8.33974	0.90881	9.835	0.0341	11.5795	3.54004	0.0104203	22.5649	0.820599	0.045654	0.259792	2.25733	0.0678886	0.183347	0.0780996	0.193105	2.19722	0.3333	0	0.481483	2.21618	1	2.89037	0.706403	0.0016	0.0230301	0.0132358
28	2011	F	0	0	深圳市	0.0263787	0	4.25	5	76.56	1	58.3	9	100	5	76.68	0.045968	5.25362	-4.27192	-1.02951	0.255494	0.00371099	8.30894	0.931098	9.888	0.0154	11.6121	3.34599	0.0061263	22.76	0.813874	0.046923	0.256281	2.16572	0.0296534	0.171056	0.0782283	0.158132	2.19722	0.3333	0	0.511587	1.54746	1	2.94444	0.784883	0.0016	0.0231082	0.0117902
28	2012	F	0	0	深圳市	0.25113	0	4.25	4	72.99	1	58.3	7	85.35	5	75.21	0.013282	5.39187	-4.30411	-1.06906	0.300141	0.00354841	8.33591	0.985526	9.936	0.0468	11.7219	3.3371	0.00610993	22.9528	0.802164	0.056987	0.296217	2.12213	0.0348495	0.186608	0.0742792	0.19044	2.07944	0.375	0	0.481056	1.8117	1	2.99573	0.845959	0.0012	0.0217765	0.0037318
28	2013	F	0	0	深圳市	0.249829	0	4	4	73.88	1	58.01	8	90.23	5	75.29	0.045972	3.67104	-4.33434	-1.07727	0.262969	0.00267871	8.36171	1.03207	10.237	0.0194	11.7297	3.42302	0.00917099	23.1264	0.790499	0.052493	0.257103	2.0831	0.0420539	0.165607	0.0693388	0.176979	2.07944	0.375	0	0.489796	1.90759	1	3.04452	0.74155	0.0009	0.0199253	0.0037097
28	2014	F	0	0	深圳市	0.254427	0	4.75	5	76.99	3	67.56	8	90.23	5	76.68	0.296508	3.62824	-4.36392	-1.08537	0.140414	0.00222738	8.43251	1.03989	10.445	0.0314	11.915	3.44766	0.00591183	23.275	0.621854	0.056085	0.186901	2.00565	-0.0621015	0.181023	0.0581153	0.12995	2.19722	0.3333	0	0.584065	1.68908	1	3.09104	0.73544	0.0007	0.0198009	0.002469
28	2016	F	0	1	深圳市	0.432061	0	4.75	5	79.39	3	67.56	6	80.46	6	84.09	0.147472	1.39816	-4.394	-1.12004	0.149928	0.0222772	9.96138	1.2159	10.49	0.0818	12.0282	4.85968	0.0207014	23.7826	0.581754	0.06159	0.152735	1.98186	0.0690922	0.190003	0.0228506	0.586897	2.07944	0.375	0	0.570858	1.50696	1	3.17805	0.747325	0.0007	0.0208425	0.0030721
28	2017	F	0	1	深圳市	0.453571	0	6.5	7	86.8	5	77.78	9	100	7	86.33	0.150457	1.61628	-4.42823	-1.07997	0.11555	0.0294433	10.0204	1.28451	10.61	0.0391	12.1202	4.69248	0.0156436	23.8298	0.55569	0.052988	0.122762	1.89022	0.0575238	0.169259	0.0246921	0.000368	1.94591	0.4286	0	0.62293	1.53214	1	3.21888	0.750878	0.0006	0.0178354	0.014107
28	2018	F	0	1	深圳市	0.456674	0	5.5	5	77.51	1	52.91	9	95.12	6	82.24	0.071571	-0.365812	-4.43327	-1.11684	0.0924836	0.0222429	10.1194	1.32152	10.854	0.0519	12.1525	4.8295	0.0229123	24.0882	0.519335	0.052597	0.113155	1.68204	0.045717	0.151721	0.0210137	0.045046	2.19722	0.3333	0	0.628802	1.07714	1	3.2581	0.754544	0.0006	0.0181655	0.0114513
28	2019	F	0	1	深圳市	0.378022	0	5	5	79.45	1	52.09	9	100	6	84.4	0.106484	0.337109	-4.45077	-1.1333	0.0868468	0.0142595	10.2127	1.38968	11.342	0.0787	12.2234	5.034	0.0203671	24.2354	0.541779	0.047532	0.101431	1.66677	0.0596753	0.147594	0.0182753	0.206931	2.3979	0.3636	0	0.662353	1.06866	1	3.29584	0.753496	0.001	0.0161784	0.0126552
28	2020	F	0	1	深圳市	0.42178	0	4.5	5	75.16	1	46.26	9	95.12	6	80.96	0.098327	1.77125	-4.46308	-1.13851	0.0888985	0.0135177	10.5529	1.42588	11.673	0.0643	11.9786	5.71698	0.012166	24.402	0.573461	0.04676	0.106048	1.62039	0.0379534	0.158734	0.0215735	0.146096	2.3979	0.3636	0	0.645054	1.03047	1	3.3322	0.710085	0.001	0.0169017	0.0134569
28	2021	F	0	1	深圳市	0.449618	0	4.75	5	75.83	1	56.64	6	84.83	5	77.75	0.132995	2.09427	-4.48939	-1.12726	0.075861	0.0167842	10.5812	1.36837	12.014	0.0511	12.0649	5.91092	0.0124654	24.4794	0.57876	0.037088	0.087517	1.65961	0.0386872	0.178141	0.0203027	0.145992	2.30259	0.4	0	0.630744	0.923216	1	3.3673	0.664672	0.001	0.0152965	0.0201591
28	2022	F	0	1	深圳市	0.491347	0	4.25	4	74.59	1	56.64	5	79.6	5	79.12	0.072595	1.91059	-4.53009	-1.14529	0.079334	0.0148154	10.5789	1.35959	12.364	0.0329	12.1187	6.1461	0.0141639	24.4755	0.54372	0.041493	0.094576	1.71999	0.0600818	0.183875	0.0199483	0.074393	2.30259	0.4	0	0.634364	0.854442	1	3.4012	0.6864	0.001	0.0153735
28	2023	F	0	1	深圳市	0.501121	0	4.25	4	74.43	1	56.64	5	79.72	5	78.65	0.132956	1.68708	-4.5498	-1.14875	0.102974	0.0170064	10.5828	1.3905	12.725	0.0663	12.1819	6.30369	0.0131461	24.5855	0.559021	0.043432	0.096901	1.6738	0.0617421	0.167938	0.0182093	0.0277	2.19722	0.4444	0	0.619431	0.874304	1	3.43399	0.712451	0.001	0.0146558
29	2009	K	0	0	深圳市	0.0408191	0	4.75	5	77.93	1	51.51	6	82.9	6	81.93	0.346601	6.81536	-4.30926	-0.92166	0.0169125	0.0146673	7.55224	0.930005	9.244	0	11.4379	3.48536	0.009652	21.9355	0.638325	0.007186	0.016759	0.266648	-0.122616	0.621312	0.0197207	0.062573	2.19722	0.3333	0	0.642829	2.65909	1	2.83321	0.640888	0	0.0935993	0.021458
29	2010	K	0	0	深圳市	0.0646788	0	4.75	5	75.93	1	51.51	5	79.98	6	80.15	0.613565	3.30956	-4.34947	-0.937215	0.0697696	0.0140674	7.52941	0.90881	9.835	0.0341	11.5795	3.54004	0.0104203	21.9409	0.615344	0.025154	0.067401	0.302975	-0.0529881	0.658443	0.0190958	0.361077	2.19722	0.3333	0	0.641986	1.95196	1	2.89037	0.639904	0	0.0685498	0.0051911
29	2011	K	0	0	深圳市	0.0892929	0	5	5	76.94	1	53.09	5	79.98	6	81.93	0.430786	4.30236	-4.38773	-0.945102	0.0778993	0.0142417	7.48773	0.931098	9.888	0.0154	11.6121	3.34599	0.0061263	21.8976	0.567289	0.030596	0.07496	0.310314	0.0355841	0.659047	0.0188245	0.00523	2.19722	0.3333	0	0.640818	1.52234	1	2.94444	0.639374	0	0.0634529	0.013416
29	2012	K	0	0	深圳市	0.0666314	0	5	5	76.59	1	54.89	6	80.39	6	80.15	0.420024	4.57593	-4.43269	-0.937018	0.0763112	0.015324	7.48268	0.985526	9.936	0.0468	11.7219	3.3371	0.00610993	22.035	0.594074	0.030691	0.073505	0.295877	0.00738258	0.65497	0.0170236	0.003656	2.19722	0.3333	0	0.645979	1.65477	1	2.99573	0.646249	0	0.0661216	0.036889
29	2013	K	0	0	深圳市	0.214095	0	5	5	75.47	1	59.84	6	80.39	5	75.95	0.548221	2.50206	-4.47581	-0.984538	0.151536	0.0129706	7.45934	1.03207	10.237	0.0194	11.7297	3.42302	0.00917099	22.1619	0.588383	0.057599	0.140845	0.533935	0.0462513	0.70412	0.0144043	1.05454	2.19722	0.3333	0	0.641343	1.44702	1	3.04452	0.637012	0	0.0301648	0.0330482
29	2014	K	0	0	深圳市	0.171119	0	4.5	5	76.19	1	53.31	5	79.98	6	80.15	0.676223	1.7849	-4.51647	-0.966743	0.171787	0.0136062	7.51698	1.03989	10.445	0.0314	11.915	3.44766	0.00591183	22.1992	0.535301	0.069395	0.1582	0.496452	0.0736354	0.639197	0.012416	0.007479	2.19722	0.3333	0	0.672335	2.01744	1	3.09104	0.666565	0	0.0304753	0.0084191
29	2015	K	0	0	深圳市	0.158019	0	5	5	77.74	1	53.31	6	81.81	6	81.93	0.583203	-2.53912	-4.55565	-1.0042	0.0833638	0.0147546	7.48717	1.10955	11.076	0.0448	11.9703	5.15504	0.0122448	22.1536	0.472851	0.070384	0.142129	0.505753	0.262479	0.513458	0.0124916	0.014564	2.19722	0.3333	0	0.652617	3.39056	1	3.13549	0.645607	0.0089	0.0272185	0.0370346
29	2020	K	0	1	深圳市	0	0	5	5	77.72	1	52.41	6	81.23	6	82.73	0.489521	-1.73915	-4.75778	-1.02528	0.0584485	0.00663269	7.41938	1.42588	11.673	0.0643	11.9786	5.71698	0.012166	22.32	0.259237	0.058896	0.080746	0.328034	0.0577616	0.247212	0.00567965	-0.36635	2.3979	0.2727	0	0.640832	1.61426	1	3.3322	0.639	0.0012	0.0579664	0.0211192
29	2021	K	0	1	深圳市	0	0	4.25	4	74.37	3	65.5	4	73.13	6	82.26	0.608808	2.68504	-4.79686	-1.02326	0.031369	0.00495172	7.36391	1.36837	12.014	0.0511	12.0649	5.91092	0.0124654	22.545	0.316243	0.039139	0.055197	0.237565	-0.195059	0.652638	0.00386905	-0.182178	2.19722	0.3333	0	0.646744	1.48915	1	3.3673	0.63824	0.0012	0.074431	0.0634936
29	2022	K	0	1	深圳市	0	0	4.5	4	74.8	3	65.5	4	74.11	6	82.62	0.633997	3.79824	-4.83771	-1.02746	0.0209271	0.00740013	5.6204	1.35959	12.364	0.0329	12.1187	6.1461	0.0141639	22.4619	0.246623	0.025198	0.035137	0.106868	-0.11877	0.748204	0.00376561	-0.519693	2.07944	0.375	1	0.639693	2.48422	1	3.4012	0.625436	0.0009	0.0878942
29	2023	K	0	1	深圳市	0	0	4.75	5	77.45	4	72.15	5	77.41	6	81.63	0.563781	-0.23628	-4.87611	-1.00083	#N/A	0.00245073	5.58725	1.3905	12.725	0.0663	12.1819	6.30369	0.0131461	22.5928	0.417739	-0.073538	-0.111046	0.087209	0.161139	0.603705	0.0030728	-0.163145	2.19722	0.3333	1	0.641487	2.07536	1	3.43399	0.628948	0	0.10542
30	2013	C	0	0	长春市	0.0221632	0	1	1	58.64	1	49.35	1	53.04	3	67.17	0.454855	1.51781	-4.3141	0	0.12159	0.0260361	8.75951	1.28929	7.336	0	11.1041	2.85052	0.0015755	22.6848	0.402571	0.088246	0.147538	0.78142	-0.0105348	0.083555	0.194332		2.07944	0.375	0	0.715943	1.07846	1	3.04452	0.772887	1.1947	0.0892788	0.014429
30	2014	C	0	0	长春市	0	0	2.5	3	67.08	1	52.29	3	67.51	4	74.35	0.516244	0.431682	-4.3535	-1.05582	0.128574	0.0138739	8.75526	1.28559	7.323	0.0217	11.1689	3.03211	0.00131189	22.7072	0.345046	0.093511	0.149257	0.696732	0.0494923	0.0813471	0.18929	-0.04166	2.07944	0.375	0	0.673514	1.37481	1	3.09104	0.738648	1.2364	0.0994107	0.009522
30	2015	C	1	0	长春市	0	0	3	3	65.85	1	52.29	2	60.45	5	76.42	0.469614	-0.332392	-4.39008	-1.0635	0.066538	0.0132493	8.86503	1.27929	7.618	0.0508	11.2026	3.39668	0.00162702	22.8133	0.343888	0.068368	0.104289	0.564128	0.041266	0.0707319	0.219005	-0.135429	2.19722	0.3333	0	0.669591	1.4322	1	3.13549	0.748358	1.2229	0.114784	0.0166924
30	2016	C	1	1	长春市	0.0568206	0	3	3	67.76	1	52.29	3	67.51	5	75.83	0.387478	-0.349585	-4.42527	-1.07126	0.0780228	0.0140498	8.85009	1.38297	7.661	0.1159	11.2827	3.50063	0.00159372	22.9286	0.3635	0.078868	0.122135	0.682692	0.0662157	0.071745	0.190878	0.352169	2.19722	0.3333	0	0.65405	1.55875	1	3.17805	0.743323	0.7062	0.097512	0.0144417
30	2017	C	1	1	长春市	0	0	3	3	66.73	1	50.52	2	62.54	5	77.83	0.334078	0.321997	-4.45829	-1.06407	0.0971942	0.0130185	8.84908	1.45946	8.358	0.0469	11.3675	3.31398	0.00206921	23.0616	0.389791	0.08426	0.135361	0.740149	0.0446624	0.0611635	0.17111	0.228161	2.19722	0.3333	0	0.65881	1.38934	1	3.21888	0.721066	0.7062	0.0879045	0.0098987
30	2018	C	1	1	长春市	0	0	3	3	65.6	1	53.89	2	62.54	4	73.65	0.235687	0.468826	-4.49071	0	0.0922616	0.0334251	8.93063	1.49119	8.262	0.0392	11.4686	3.19672	0.0016966	23.1813	0.389844	0.079257	0.129891	0.712362	0.0292828	0.0603536	0.190678	0.091651	2.19722	0.3333	0	0.686647	0.96114	1	3.2581	0.72681	0.4519	0.0687225	0.0133894
30	2019	C	1	1	长春市	0	0	3	3	65.58	1	50.52	2	63.8	4	74.47	0.211383	0.782801	-4.52338	-1.09094	0.0836617	0.0314235	8.9153	1.52478	7.481	0.1809	11.2703	4.34867	0.00191213	23.2821	0.423117	0.0718	0.121144	0.818105	0.0283393	0.0724729	0.181549	0.2816	2.19722	0.3333	0	0.690514	1.08321	1	3.29584	0.726541	0.2101	0.0502682	0.0111415
30	2020	C	1	1	长春市	0	0	3	3	70	1	53.89	2	64.26	6	82.09	0.204948	0.27395	-4.55414	-1.08584	0.0461859	0.033908	8.90883	1.4776	7.756	0.1905	11.2598	4.32079	0.0027944	23.3948	0.427812	0.066355	0.11552	0.81173	0.0412769	0.071974	0.170371	0.104297	2.19722	0.3333	0	0.705103	1.33169	1	3.3322	0.778613	0.1189	0.0569144	0.007947
30	2021	C	1	1	长春市	0	0	3.25	3	69.62	1	59.79	4	73.37	4	73.45	0.164612	-0.868333	-4.59174	-1.08009	0.028415	0.0102483	8.94833	1.43484	8.04	0.129	11.2677	4.5441	0.00265812	23.422	0.427218	0.053089	0.092734	0.874976	0.121686	0.0768803	0.201325	0.154297	2.19722	0.3333	0	0.685966	1.31665	1	3.3673	0.741349	0.1189	0.054686
30	2022	C	1	1	长春市	0	0	4	4	71.33	1	59.79	4	73.23	5	77.95	0.247999	1.02786	-4.62936	-1.08391	0.00187205	0.0104804	8.99814	1.54654	8.335	0.2017	11.216	5.18498	0.000638087	23.4484	0.44487	0.031107	0.055169	0.834697	0.0184716	0.0877344	0.192162	-0.020088	2.19722	0.3333	0	0.685966	0.960077	1	3.4012	0.712222	0.0799	0.0505334
30	2023	C	1	1	长春市	0	0	4	4	70.26	2	60.21	4	74.26	4	74.03	0.200348	1.74089	-4.65911	-1.10083	0.0909737	0.0035425	8.98444	1.59244	8.641	0.2	11.2527	5.40635	0.00225154	23.5551	0.481522	0.045509	0.084984	0.982278	0.0026069	0.0732809	0.171272	0.2603	2.19722	0.3333	0	0.713107	1.02099	1	3.43399	0.750213	0.0831	0.0490398	0.0094854
31	2009	K	0	0	深圳市	0	0	5.75	6	80.51	2	64.05	7	89.19	5	77.71	0.215631	3.60382	-4.16118	-1.08411	0.0554628	0.0302721	7.32185	0.930005	9.244	0	11.4379	3.48536	0.009652	23.3101	0.513593	0.03366	0.077189	0.180305	0.00592624	0.483594	0.0203954	0.852644	2.19722	0.3333	0	0.528423	2.04649	1	2.83321	0.554202	0	0.0872953	0.0009389
31	2010	K	0	0	深圳市	0.00189118	0	5.25	5	79.45	2	62.03	6	82.93	6	81.91	0.227924	4.28026	-4.16048	-1.0575	0.0923447	0.0293441	7.43367	0.90881	9.835	0.0341	11.5795	3.54004	0.0104203	23.7276	0.696077	0.032175	0.085899	0.122619	-0.178107	0.635661	0.0123715	0.04968	2.19722	0.3333	0	0.557851	1.25619	1	2.89037	0.589005	0.0008	0.111834	0.0044392
31	2011	K	0	0	深圳市	0.0284476	0	6	6	81.25	3	69.23	7	85.69	6	81.02	0.060195	5.8978	-4.13515	-1.15347	0.105307	0.0315775	7.54274	0.931098	9.888	0.0154	11.6121	3.34599	0.0061263	24.2077	0.781679	0.027431	0.106187	0.207488	-0.074023	0.751175	0.00523624	1.62166	2.19722	0.3333	0	0.576827	0.993079	1	2.94444	0.607934	0.0008	0.0522506	0.008665
31	2012	K	0	0	深圳市	0.0567163	0	6	6	81.26	2	63.83	8	90.54	5	78.22	0.046551	3.73329	-4.16457	-1.11977	0.090093	0.0209971	7.80057	0.985526	9.936	0.0468	11.7219	3.3371	0.00610993	24.274	0.782565	0.02018	0.092626	0.23561	0.0758739	0.713557	0.0125447	0.433818	2.19722	0.3333	0	0.540936	1.00955	1	2.99573	0.565334	0.0008	0.0381688	0.0117972
31	2013	K	0	0	深圳市	0.033613	0	6	6	81.51	2	64.05	8	90.54	5	78.73	0.060552	4.16874	-4.17869	-1.10817	0.106688	0.0138785	7.83992	1.03207	10.237	0.0194	11.7297	3.42302	0.00917099	24.4271	0.779069	0.024317	0.110189	0.26927	-0.0808296	0.718729	0.0145638	0.281156	2.07944	0.375	0	0.533717	0.944796	1	3.04452	0.53548	0.0008	0.030179	0.0026879
31	2014	K	0	0	深圳市	0.0864917	0	5.5	6	80.03	1	58.88	7	86.36	6	81.02	0.085347	3.41342	-4.19485	-1.11472	0.0854216	0.00923844	7.92769	1.03989	10.445	0.0314	11.915	3.44766	0.00591183	24.5587	0.769711	0.020775	0.091957	0.20804	-0.0445208	0.705511	0.0126822	-0.111784	2.19722	0.3333	0	0.535183	1.10103	1	3.09104	0.584956	0.0008	0.0373504	0.0060935
31	2015	K	0	0	深圳市	0.413654	0	5.25	5	79.11	2	60.45	6	83.6	6	81.02	0.038173	3.10164	-4.20026	-1.10336	0.0914295	0.0378701	7.95823	1.10955	11.076	0.0448	11.9703	5.15504	0.0122448	24.7364	0.79961	0.019703	0.092062	0.265652	-0.0328302	0.685415	0.0102469	0.493175	2.19722	0.3333	0	0.505182	1.26024	1	3.13549	0.51584	0.0006	0.0266557	0.0044748
31	2016	K	0	1	深圳市	0.425907	0	5	5	79.52	2	62.03	6	84.02	6	81.02	0.024343	1.63079	-4.21914	-1.14084	0.125757	0.11028	8.04623	1.2159	10.49	0.0818	12.0282	4.85968	0.0207014	24.8387	0.815795	0.022544	0.11841	0.304738	0.111585	0.496408	0.0102569	0.335245	1.94591	0.4286	0	0.504723	1.07982	1	3.17805	0.513134	0	0.0240936	0.0032275
31	2018	K	0	1	深圳市	0.521129	0	6	6	81.41	2	62.48	7	89.37	6	80.13	0.016853	3.96951	-4.20851	-1.14237	0.150971	0.246061	8.35185	1.32152	10.854	0.0519	12.1525	4.8295	0.0229123	25.236	0.849079	0.024015	0.157178	0.169174	-0.0204434	0.469827	0.00601681	0.005499	2.19722	0.3333	0	0.534419	0.946159	1	3.2581	0.540954	0.0006	0.0434407	0.0034505
31	2019	K	0	1	深圳市	0.0285384	0	6	6	83.92	2	60.81	8	92.62	6	83.3	0.020497	2.96315	-4.05652	-1.22748	0.0752368	0.133356	9.15504	1.38968	11.342	0.0787	12.2234	5.034	0.0203671	25.9337	0.767767	0.02157	0.09471	0.196685	0.0221909	0.413622	0.0230586	1.39289	2.07944	0.375	0	0.798385	0.963801	1	3.29584	0.832149	0.0003	0.0471421	0.0036719
31	2020	K	0	1	深圳市	0.0269556	0	6.5	7	85.86	3	67.88	8	93.88	6	84.19	0.018409	2.97537	-4.06958	-1.13746	0.0252163	0.118817	9.23825	1.42588	11.673	0.0643	11.9786	5.71698	0.012166	26.0209	0.771622	0.005847	0.025478	0.200205	0.0491021	0.437567	0.0202519	0.137885	2.3979	0.3636	0	0.792243	0.943292	1	3.3322	0.808468	0.0003	0.0374609	0.0061002
31	2021	K	0	1	深圳市	0.0220054	0	4.75	4	74.17	3	68.08	5	77.1	5	76.72	0.031123	4.23495	-4.08993	-1.13581	0.014953	0.114278	9.22877	1.36837	12.014	0.0511	12.0649	5.91092	0.0124654	26.0833	0.755127	0.00372	0.015704	0.206566	-0.0397887	0.479503	0.0174628	0.108445	2.3979	0.3636	0	0.782935	0.925136	1	3.3673	0.798691	0.0003	0.0371001
31	2022	K	0	1	深圳市	0.0194515	0	4.5	4	74.26	4	70.89	5	77.16	4	74.72	0.004568	3.89761	-4.12738	-1.14703	#N/A	0.09175	9.18297	1.35959	12.364	0.0329	12.1187	6.1461	0.0141639	26.0913	0.778466	-0.010407	-0.044633	0.185311	0.0126401	0.446318	0.0164145	-0.071239	2.3979	0.3636	0	0.781098	0.863303	1	3.4012	0.794334	0.0003	0.038635
31	2023	K	0	1	深圳市	0.0145635	0	4.5	5	76.22	4	71.35	5	76.59	5	79.76	0.033309	3.4901	-4.19243	-1.13971	0.00263951	0.0850535	8.84664	1.3905	12.725	0.0663	12.1819	6.30369	0.0131461	26.0118	0.767269	0.000588	0.002593	0.178346	0.0537286	0.464208	0.0166669	-0.07063	2.30259	0.4	0	0.77927	0.842683	1	3.43399	0.792621	0	0.0456478	0.0078212
32	2009	C	0	0	深圳市	0	0	4.25	4	74.25	1	55.34	5	75.58	6	81.9	0.669135	0.519141	-3.72545	-0.990415	0.0325991	0.0101799	7.22984	0.930005	9.244	0	11.4379	3.48536	0.009652	21.0867	0.448143	0.03455	0.060734	0.890963	0.142464	0.369546	0.102139	-0.267986	2.07944	0.375	0	0.520672	1.84523	1	2.83321	0.507874	0.0259	0.075964	0.0768946
32	2010	C	0	0	深圳市	0	0	3.5	4	72.62	1	53.35	5	75.58	5	79.88	0.591392	1.35531	-3.7693	-0.948475	0.0382595	0.0203575	7.46394	0.90881	9.835	0.0341	11.5795	3.54004	0.0104203	21.1217	0.461773	0.032906	0.060387	1.02117	0.0059287	0.366154	0.0896431	0.19906	2.19722	0.3333	0	0.484127	1.99217	1	2.89037	0.4606	0.0259	0.0663213	0.265841
32	2011	C	0	0	深圳市	0	0	4	4	74.33	1	53.54	9	100	4	74.79	0.627081	3.23997	-3.81519	-0.915945	0.0544289	0.0137371	7.21891	0.931098	9.888	0.0154	11.6121	3.34599	0.0061263	21.177	0.447662	0.026702	0.052066	1.02449	0.0223584	0.315348	0.0786766	0.151976	2.19722	0.3333	0	0.492203	1.29817	1	2.94444	0.488046	0.0259	0.0726792	0.266291
32	2012	C	0	0	深圳市	0	0	3.25	3	69.32	1	53.54	5	75.58	4	74.01	0.755133	1.42292	-3.86246	-0.99175	0.150389	0.0292062	7.14204	0.985526	9.936	0.0468	11.7219	3.3371	0.00610993	21.2492	0.380335	0.109596	0.186636	0.928824	0.0150432	0.285899	0.0611151	-0.119137	2.19722	0.3333	0	0.486554	1.38493	1	2.99573	0.481	0.0217	0.0883439	0.228544
32	2013	C	0	0	深圳市	0	0	4	5	75.33	1	59.31	6	80.46	6	80.49	0.779015	2.08861	-3.89017	-0.978839	0.00796913	0.0642658	7.10743	1.03207	10.237	0.0194	11.7297	3.42302	0.00917099	21.1297	0.32395	0.009401	0.014549	1.01799	-0.0363642	0.214095	0.0440467	0.071572	2.19722	0.3333	0	0.498411	1.66853	1	3.04452	0.4789	0.0185	0.0732902	0.0080594
32	2014	C	1	0	深圳市	0	0	5	5	75.41	1	59.31	7	85.35	5	79.03	0.699347	-0.341817	-3.98011	-1.04451	0.0598266	0.0587639	7.03878	1.03989	10.445	0.0314	11.915	3.44766	0.00591183	21.741	0.460739	0.044921	0.076478	1.43889	0.0282061	0.120362	0.0417097	0.889225	2.30259	0.3	0	0.491159	1.38646	1	3.09104	0.478902	0.0007	0.0550832	0.0086677
32	2015	F	0	0	深圳市	0.000387771	0	4.25	4	74.5	1	59.31	6	80.46	5	79.03	0.721255	-0.902147	-4.00252	-0.993003	0.0289375	0.0143704	7.32909	1.10955	11.076	0.0448	11.9703	5.15504	0.0122448	21.4774	0.290364	0.020219	0.032968	0.805312	0.15752	0.148972	0.0418708	-0.358459	2.30259	0.3	0	0.630696	3.33473	1	3.13549	0.67421	0.0004	0.0850969	0.0277058
32	2016	F	0	1	深圳市	0.000354246	0	4.75	5	77.97	4	70.66	9	100	4	73.86	0.818862	0.125171	-4.03569	-0.992085	0.0246724	0.0213805	7.28619	1.2159	10.49	0.0818	12.0282	4.85968	0.0207014	21.3939	0.20752	0.022424	0.029925	0.973894	0.0401932	0.143701	0.0530868	0.008754	2.19722	0.3333	0	0.634266	2.61054	1	3.17805	0.647575	0.3637	0.0825427	0.0303855
32	2017	F	0	1	深圳市	0.000316472	0	5	5	78.7	4	71.22	7	85.35	5	79.72	0.763875	-1.22073	-4.07445	0	0.00295473	0.0313471	7.13966	1.28451	10.61	0.0391	12.1202	4.69248	0.0156436	21.3794	0.186046	0.006731	0.008381	0.886517	0.0694182	0.0629063	0.0437886	-0.133971	2.19722	0.3333	0	0.637029	1.9199	1	3.21888	0.650838	0.3633	0.08272	0.0095131
32	2018	F	0	1	深圳市	0.00154563	0	5	5	76.66	4	71.22	5	75.58	5	79.34	0.697591	-2.21943	-4.12352	0	0.0547612	0.023324	6.12468	1.32152	10.854	0.0519	12.1525	4.8295	0.0229123	21.4903	0.295935	0.051415	0.07009	0.736309	0.0957075	0.13065	0.0357387	-0.069952	2.19722	0.3333	0	0.641436	1.43484	1	3.2581	0.656818	0.3712	0.0795861	0.0337748
32	2019	F	0	1	深圳市	0.00134486	0	5	5	76.2	3	69.33	5	75.58	5	79.34	0.651325	-0.449178	-4.16969	0	0.0813314	0.0158567	6.07074	1.38968	11.342	0.0787	12.2234	5.034	0.0203671	21.5744	0.292026	0.070194	0.09941	0.667814	0.0314582	0.184653	0.0369842	-0.06219	2.19722	0.3333	0	0.646152	2.78876	1	3.29584	0.66149	0.2784	0.0716035	0.0442054
32	2020	F	0	1	深圳市	0.00117093	0	5	5	77.51	3	69.33	6	80.46	6	80.03	0.728504	2.15736	-4.21616	0	0.116754	0.0188312	6.16542	1.42588	11.673	0.0643	11.9786	5.71698	0.012166	21.6733	0.300958	0.076695	0.109052	0.617206	-0.0484453	0.0308509	0.0317094	0.013109	2.19722	0.3333	0	0.639975	3.15208	1	3.3322	0.625801	0.3259	0.0606749	0.0098223
32	2021	E	0	1	深圳市	0.0432267	0	4.75	4	74.11	3	68.08	5	77.24	4	74.98	0.108514	3.37966	-4.08376	-2.06507	0.117066	0.0146403	9.9377	1.36837	12.014	0.0511	12.0649	5.91092	0.0124654	24.5104	0.785055	0.027637	0.132689	1.06522	0.0021303	0.0224275	0.0958375	27.0796	2.19722	0.3333	0	0.510164	1.1156	1	3.3673	0.651983	4.3685	0.0293928
32	2022	E	0	1	深圳市	0.0533902	0	4	4	74.73	3	68.08	5	79.68	4	74.62	0.019523	4.23179	-4.08945	-1.14421	0.065504	0.0120574	10.0929	1.35959	12.364	0.0329	12.1187	6.1461	0.0141639	24.6905	0.808366	0.014448	0.071918	1.03371	-0.00467179	0.0212698	0.0829861	0.195494	2.19722	0.3333	0	0.501549	1.13729	1	3.4012	0.646369	4.2704	0.0356463
32	2023	E	0	1	深圳市	0.118707	0	4.25	4	74.29	3	68.08	5	79.4	4	73.82	0.080465	4.07629	-4.11591	-1.14678	0.0673439	0.0131027	10.0586	1.3905	12.725	0.0663	12.1819	6.30369	0.0131461	24.7578	0.789892	0.015991	0.079479	1.0293	0.0115946	0.0163394	0.0869828	0.10248	2.19722	0.3333	0	0.497936	1.12258	1	3.43399	0.663915	4.2704	0.0308496	0.0768255
34	2011	S	0	0	深圳市	0	0	4	4	71.5	1	45.69	9	95.12	4	74.77	0.147944	8.17077	-3.90822	-0.829876	0.241656	0.00991888	6.97821	0.931098	9.888	0.0154	11.6121	3.34599	0.0061263	19.1512	0.589127	0.083742	0.21937	2.18754	0.0430001	0.22188	0.177294	0.078387	1.94591	0.4286	1	0.422928	7.01394	0	2.94444	0.45301	0.0012	0.0792805	0.0963766
34	2012	S	0	0	深圳市	0.0102609	0	4	4	70.09	1	51.55	6	80.46	4	74.6	0.016335	9.77342	-3.92849	-0.832104	0.0470664	0.00898308	6.99851	0.985526	9.936	0.0468	11.7219	3.3371	0.00610993	19.0811	0.538522	0.020015	0.045982	2.27977	-0.0412026	0.245659	0.372728	0.054421	1.94591	0.4286	1	0.409251	7.73003	0	2.99573	0.43286	0.0012	0.0671374	0.0598836
34	2013	S	0	0	深圳市	0.0157169	0	4.75	5	75.29	2	62.99	8	90.23	5	75.64	0.125113	4.6278	-4.13956	-0.853366	0.187716	0.00357732	6.99026	1.03207	10.237	0.0194	11.7297	3.42302	0.00917099	19.751	0.719504	0.05865	0.17161	1.86461	0.0191809	0.135744	0.14502	0.165694	1.94591	0.4286	1	0.409251	4.51891	0	3.04452	0.44007	0.0012	0.0605677	0.0537668
34	2014	S	0	0	深圳市	0	0	4.75	5	78.31	4	70.66	7	85.35	5	79.27	0.503111	6.25516	-4.22302	-0.879528	0.338612	0.00457682	6.98286	1.03989	10.445	0.0314	11.915	3.44766	0.00591183	19.9504	0.641221	0.146381	0.452454	1.21221	-0.0609814	0.209178	0.127215	-0.045029	1.94591	0.4286	1	0.392629	5.69751	0	3.09104	0.422465	0.0012	0.072618	0.0543371
34	2015	S	0	0	深圳市	0.00564897	0	5	5	77.91	4	70.66	7	85.35	5	78.57	0.024529	6.78248	-4.25669	-0.877076	0.128976	0.00657905	6.84162	1.10955	11.076	0.0448	11.9703	5.15504	0.0122448	19.9203	0.582597	0.046969	0.121163	1.00709	-0.0301386	0.221392	0.124532	-0.10017	1.94591	0.4286	1	0.383156	21.8187	0	3.13549	0.438769	0.004	0.0995049	0.0059711
34	2016	F	0	1	深圳市	0.921755	0	4.75	4	72.29	3	66.78	5	75.58	4	73.56	0.070856	-4.10857	-4.49876	-4.08335	0.179191	0.0153537	8.34688	1.2159	10.49	0.0818	12.0282	4.85968	0.0207014	23.5587	0.844418	0.046071	0.283883	4.63605	0.0203016	0.268846	0.012569	87.4837	1.94591	0.4286	0	0.544428	1.38382	0	3.17805	0.312461	37.3559	0.00721895	0.0153134
34	2018	F	0	1	深圳市	0.0202515	0	3.75	3	67.38	1	46.26	9	95.12	3	67.3	0.047245	4.27949	-4.52849	-1.11732	0.100274	0.00845827	8.34948	1.32152	10.854	0.0519	12.1525	4.8295	0.0229123	23.9808	0.851975	0.020535	0.143255	3.25747	0.0138747	0.250412	0.00655539	0.315708	2.07944	0.5	1	0.544428	1.10427	0	3.2581	0.253791	35.615	0.0031693	0.0205532
34	2019	F	0	1	深圳市	0.00312936	0	2.75	3	68.82	1	46.26	6	80.46	4	74.64	0.111078	3.2365	-4.55079	-1.11992	0.148083	0.00622384	8.3114	1.38968	11.342	0.0787	12.2234	5.034	0.0203671	24.105	0.851301	0.025328	0.170691	3.13334	0.0509715	0.312663	0.00516721	0.060413	2.07944	0.5	1	0.502084	1.21523	0	3.29584	0.252382	33.7892	0.00304659	0.0204179
34	2020	F	0	1	深圳市	0.00231413	0	3.5	4	70.13	1	46.26	7	85.35	5	75.34	0.122763	3.5888	-4.58447	-1.12356	0.118788	0.00690891	8.42705	1.42588	11.673	0.0643	11.9786	5.71698	0.012166	24.1472	0.846763	0.020765	0.137502	3.06304	0.0474728	0.31152	0.00647814	0.060563	1.94591	0.5714	1	0.449926	1.23226	0	3.3322	0.213948	30.2992	0.00259079	0.0291979
34	2021	F	0	1	深圳市	0.00283117	0	4	4	71.47	3	67.11	4	71.28	4	73.89	0.111995	3.99274	-4.5859	-1.12545	0.0189461	0.00775441	8.55834	1.36837	12.014	0.0511	12.0649	5.91092	0.0124654	24.3856	0.830145	0.007173	0.044132	3.51464	-0.00400806	0.373616	0.00497431	0.329397	1.79176	0.6667	1	0.449134	1.08048	0	3.3673	0.176579	23.7356	0.0023027
34	2022	F	0	1	深圳市	0.0268065	0	4	4	71.24	3	68.08	4	73.36	4	71.34	0.04149	4.15852	-4.62037	-1.13322	0.0986329	0.0073953	8.57149	1.35959	12.364	0.0329	12.1187	6.1461	0.0141639	24.4175	0.795604	0.026155	0.13929	2.92545	0.0207993	0.310697	0.00481539	-0.053151	1.94591	0.7143	1	0.410583	1.13146	0	3.4012	0.346925	23.3706	0.00269374
34	2023	F	0	1	深圳市	0.0342935	0	4	4	73.34	3	68.08	4	72.15	5	76.92	0.10193	4.50935	-4.64066	-1.13844	0.108692	0.00493173	8.7281	1.3905	12.725	0.0663	12.1819	6.30369	0.0131461	24.5273	0.793701	0.028352	0.138034	2.81138	-0.00337303	0.27488	0.0114402	0.032308	2.07944	0.625	1	0.38659	1.19711	0	3.43399	0.267955	23.3499	0.00283036	0.008071
35	2014	N	0	0	南通市	0	0	2.75	3	66.21	1	56.36	1	53.07	6	80.4	0.633416	1.69728	-4.34819	-1.37811	0.120937	0.00566382	6.82329	0.971832	10.733	0.1059	11.2575	2.38292	0.00385443	21.9088	0.504266	0.065959	0.139457	0.20762	0.0224458	0.0137417	0.220344	12.4619	1.94591	0.4286	0	0.530055	1.57862	0	3.04452	0.616215	7.0971	0.0905761	0.0137286
35	2015	N	0	0	南通市	0.00152426	0	4.5	5	75.06	3	67.42	3	66.12	7	85.1	0.450517	2.0643	-4.39656	-0.976302	0.140672	0.00252094	7.13728	1.01678	10.578	0.1097	11.3414	2.54642	0.00394737	22.2046	0.579366	0.059493	0.131428	0.215191	0.0358367	0.0159041	0.162701	0.498273	1.94591	0.4286	0	0.514659	2.13405	0	3.09104	0.572651	7.5815	0.100661	0.0141334
35	2016	N	0	1	南通市	0.00173956	0	5	5	79.16	3	67.42	5	75.91	7	86.51	0.278008	2.80281	-4.43724	-0.972583	0.1144	0.00268578	7.3072	1.09212	9.639	0.0908	11.4371	2.64963	0.00337356	22.5148	0.65617	0.040726	0.10822	0.188603	0.0375886	0.0173931	0.172554	0.18791	1.94591	0.4286	0	0.529187	1.7705	0	3.13549	0.523555	7.5821	0.113197	0.0149009
35	2018	N	0	1	南通市	0.00345545	0	5.25	5	79.2	3	67.95	6	80.1	6	83.14	0.160593	3.60965	-4.50661	-0.99673	0.0723577	0.00312179	9.06312	1.1141	9.746	0.1008	11.6555	2.46984	0.00448309	22.899	0.626002	0.026247	0.070093	0.218061	0.0238153	0.0129634	0.150389	0.145841	1.94591	0.4286	0	0.487309	1.40173	0	3.21888	0.489569	6.9484	0.100795	0.0448116
35	2019	N	0	1	南通市	0.000695575	0	5.75	5	78.56	3	68.47	5	75.91	6	84.76	0.078486	-1.7587	-4.35089	-1.3743	0.0703828	0.00440548	10.7099	1.16881	11.494	0.0993	11.7621	2.55113	0.00351806	24.5797	0.752553	0.027432	0.102621	0.662573	0.0507474	0.0134066	0.158641	9.06403	1.94591	0.4286	0	0.360771	1.04151	0	3.2581	0.561764	3.721	0.0539252	0.0296253
35	2020	N	0	1	南通市	0.000469108	0	5	5	78.99	3	68.47	5	77.15	6	84.76	0.065502	3.20217	-4.37881	-1.0755	0.0710175	0.00488333	11.0058	1.20182	11.934	0.102	11.7745	2.73161	0.00408907	24.6428	0.751984	0.016965	0.068477	0.447761	0.0596804	0.0150903	0.161176	0.176488	1.94591	0.4286	0	0.360771	0.959058	0	3.29584	0.482408	3.721	0.0440869	0.0180737
35	2021	N	0	1	南通市	0.00181837	0	5	5	76.31	4	70.78	6	80.82	5	78.04	0.153017	2.26631	-4.53643	-1.10362	0.0806653	0.0083247	9.63731	1.13884	12.39	0.1056	11.8686	2.7368	0.00456446	23.9219	0.544809	0.023186	0.073419	0.550038	0.103053	0.0202313	0.0817639	-0.058297	1.94591	0.4286	0	0.359622	1.15935	0	3.3322	0.480797	3.721	0.0627249
35	2022	N	0	1	南通市	0.00162703	0	4.25	4	72.78	1	57.45	5	79.73	6	80.91	0.049413	3.47281	-4.56596	-1.04167	0.0117882	0.00349458	9.79729	1.13397	12.864	0.1029	11.8986	2.98774	0.00464268	23.9992	0.60563	0.004772	0.011266	0.263177	0.0224381	0.0159507	0.074379	-0.674316	1.94591	0.4286	0	0.347588	1.08658	0	3.3673	0.492619	3.721	0.0645589
35	2023	N	0	1	南通市	0.00210578	0	4	4	71.56	2	63.7	6	83.42	4	70.77	0.140505	3.73478	-4.59743	-1.10617	0.0367716	0.00435473	9.87493	1.16389	13.356	0.105	11.935	3.29248	0.0048425	24.0595	0.614524	0.014084	0.036132	0.195077	0.0171034	0.0112084	0.0957317	-0.206222	1.94591	0.4286	0	0.340535	1.0564	0	3.4012	0.460944	3.721	0.101614	0.0394416
36	2010	K	0	0	深圳市	0.00796802	0	4.75	5	76.7	2	63.22	5	77.05	6	80.82	0.675835	-2.30007	-4.15563	-0.952138	0.162369	0.011643	6.34914	0.90881	9.835	0.0341	11.5795	3.54004	0.0104203	22.1524	0.47908	0.083314	0.155093	0.305872	0.251534	0.409512	0.00457803	-0.418966	2.19722	0.3333	0	0.334765	1.53698	0	2.83321	0.3347	0	0.0467806	0.00377
36	2011	K	0	0	深圳市	0.232546	0	5	5	76.96	1	58.26	5	76.8	6	83.26	0.569108	3.54569	-4.19381	-0.920327	0.0446088	0.0051127	6.60665	0.931098	9.888	0.0154	11.6121	3.34599	0.0061263	22.0745	0.40477	0.024429	0.043888	0.126092	-0.112552	0.409554	0.03238	-0.545693	2.19722	0.3333	0	0.325698	1.12352	0	2.89037	0.324519	0	0.110172	0.0004793
36	2012	K	0	0	深圳市	0.351585	0	5.75	6	80.37	1	56.47	7	85.16	6	83.71	0.582214	3.04319	-4.23604	-0.929786	0.0368212	0.00526181	6.27099	0.985526	9.936	0.0468	11.7219	3.3371	0.00610993	22.1742	0.430298	0.02124	0.036505	0.085643	-0.0390971	0.411248	0.024019	-0.313006	2.19722	0.3333	0	0.323829	1.34948	0	2.94444	0.320964	0	0.167308	0.0085143
36	2013	K	0	0	深圳市	0.333087	0	4.75	5	75.06	1	58.26	4	74.71	6	80.91	0.615212	1.73189	-4.27573	-0.924773	0.0474432	0.00258273	6.25383	1.03207	10.237	0.0194	11.7297	3.42302	0.00917099	22.1574	0.395484	0.02715	0.046256	0.045517	-0.0633363	0.403505	0.0250554	-0.446719	2.3979	0.3636	0	0.323394	1.1669	0	2.99573	0.318814	0.0009	0.325616	0.0912759
36	2014	K	0	0	深圳市	0	0	4.75	5	76.66	2	60.06	5	78.89	6	80.02	0.664155	4.75202	-4.31708	-0.925671	0.012234	0.00380803	6.38856	1.03989	10.445	0.0314	11.915	3.44766	0.00591183	22.2425	0.454282	0.006876	0.011983	0.046839	-0.392711	0.690803	0.0638111	0.065736	2.48491	0.3333	0	0.325814	1.57105	0	3.04452	0.313627	0.0009	0.357913	0.084337
36	2015	K	0	0	深圳市	0.366184	0	5	5	78.78	1	56.69	7	85.16	6	80.02	0.439038	1.41744	-4.35617	-0.968764	0.0365856	0.00264438	6.59715	1.10955	11.076	0.0448	11.9703	5.15504	0.0122448	22.5895	0.584915	0.017166	0.036588	0.074148	0.0168568	0.620867	0.0438812	0.992641	2.48491	0.3333	0	0.340687	2.15061	0	3.09104	0.376652	0.7023	0.20782	0.0304461
36	2016	K	0	1	深圳市	0.589093	0	5	5	78.63	1	54.67	7	85.91	5	79.64	0.34309	-3.84791	-4.38181	-1.21339	0.327008	0.00365645	6.69827	1.2159	10.49	0.0818	12.0282	4.85968	0.0207014	22.998	0.586168	0.167159	0.403441	0.268295	0.216217	0.454398	0.0989751	4.30953	2.3979	0.3636	0	0.342945	1.56665	0	3.13549	0.351487	0.6513	0.0469242	0.0385801
36	2017	K	0	1	深圳市	0.639907	0	5.25	6	80.07	1	57.37	7	87.5	6	80.53	0.511074	0.639119	-4.42706	-1.0868	0.187254	0.00434038	6.69703	1.28451	10.61	0.0391	12.1202	4.69248	0.0156436	22.8887	0.417036	0.148815	0.301378	0.430679	-0.0287247	0.530579	0.106397	0.828829	2.3979	0.3636	0	0.362246	1.59743	0	3.17805	0.350057	0.6009	0.0204851	0.0144156
36	2018	K	0	1	深圳市	0.540939	0	4.75	4	74.73	1	57.14	5	77.22	5	78.16	0.389314	-6.61583	-4.45529	-1.07313	0.0679745	0.00344999	6.72743	1.32152	10.854	0.0519	12.1525	4.8295	0.0229123	23.1114	0.500599	0.105155	0.195984	0.340059	0.257783	0.306356	0.0766785	-0.160427	2.3979	0.3636	0	0.396343	1.07758	0	3.21888	0.388989	0.7113	0.0266999	0.0134456
36	2019	K	0	1	深圳市	0.514452	0	5	6	80.1	1	58.94	6	84.15	6	83.24	0.153884	-3.84877	-4.488	-1.06942	0.0556141	0.000421769	6.67582	1.38968	11.342	0.0787	12.2234	5.034	0.0203671	23.2199	0.534994	0.077363	0.160748	0.275113	0.123389	0.269652	0.0672384	-0.049766	1.94591	0.4286	0	0.386704	1.06154	0	3.2581	0.424128	0.4007	0.0253686	0.017101
36	2020	K	0	1	深圳市	0.393401	0	5.25	5	77.06	1	57.14	5	77.47	6	83.24	0.283295	0.740682	-4.53557	-1.05396	0.0800218	0.000424615	6.69208	1.42588	11.673	0.0643	11.9786	5.71698	0.012166	23.1069	0.462819	0.067251	0.134756	0.235361	-0.0497035	0.294605	0.0733711	-0.146297	1.94591	0.4286	0	0.361081	1.00741	0	3.29584	0.368955	0.3827	0.0257114	0.0439997
36	2021	K	0	1	深圳市	0.286028	0	5	5	75.32	3	65.5	5	78.01	6	80.98	0.417082	0.587217	-4.58257	-1.05191	0.0763861	0.000913795	6.61874	1.36837	12.014	0.0511	12.0649	5.91092	0.0124654	22.9836	0.372875	0.051641	0.089131	0.184227	-0.0119565	0.322389	0.0808997	-0.304295	1.94591	0.4286	0	0.366719	1.04458	0	3.3322	0.410576	0.3755	0.0396652
36	2022	K	0	1	深圳市	0.27207	0	5	5	75.81	3	65.5	5	76.85	6	83.1	0.314727	-3.18905	-4.62442	-1.10736	0.0960961	0.000821649	6.65028	1.35959	12.364	0.0329	12.1187	6.1461	0.0141639	22.9464	0.322254	0.063675	0.097666	0.249065	0.244162	0.229125	0.0817449	0.245503	1.94591	0.4286	0	0.371507	0.973045	0	3.3673	0.369656	0.2791	0.0322349
36	2023	K	0	1	深圳市	0.277541	0	5	5	76.64	3	68.08	5	75.14	6	84.48	0.515774	1.933	-4.66862	-0.965658	0.0163221	0.0139295	6.55536	1.3905	12.725	0.0663	12.1819	6.30369	0.0131461	22.8513	0.261167	0.011302	0.015989	0.064104	-0.111706	0.355618	0.087562	-0.758867	1.94591	0.4286	0	0.375656	0.948672	0	3.4012	0.351969	0.1168	0.139235	0.027459
37	2009	D	0	0	深圳市	0.00126385	0	3	3	67.01	1	59.77	1	59.14	5	75.13	0.422605	3.23172	-3.91776	-0.949494	0.0619924	0.00246322	5.8944	0.930005	9.244	0	11.4379	3.48536	0.009652	22.3179	0.582695	0.024214	0.060129	0.376862	0.0707088	0.272948	0.464046	-0.408269	2.56495	0.3846	0	0.614311	1.28021	1	2.77259	0.6199	0.0029	0.053397	0.0251787
37	2010	D	0	0	深圳市	0.000404981	0	3	3	65.96	1	58.4	1	59.14	4	73.61	0.310266	2.45888	-3.95796	-0.947632	#N/A	0.0038739	5.84932	0.90881	9.835	0.0341	11.5795	3.54004	0.0104203	22.387	0.633932	-0.024189	-0.061897	0.313894	0.00490589	0.256182	0.41092	-0.142464	2.3979	0.4545	0	0.579252	1.10192	1	2.83321	0.5846	0.0029	0.0598892	0.0274933
37	2011	D	0	0	深圳市	0.0378609	0	2.25	2	63.96	1	59.77	1	59.14	3	68.83	0.235366	3.78389	-3.99791	-0.989356	0.00480778	0.0228508	5.78996	0.931098	9.888	0.0154	11.6121	3.34599	0.0061263	22.4194	0.653787	0.001683	0.004728	0.450221	0.0499354	0.230745	0.408437	0.508255	2.70805	0.4	0	0.569752	0.957894	1	2.89037	0.575337	0.004	0.0403751	0.0425464
37	2012	D	0	0	深圳市	0.0358311	0	3	4	70.25	1	58.4	3	65.58	5	78.67	0.236343	4.54188	-4.03786	-0.959251	#N/A	0.00294395	5.77144	0.985526	9.936	0.0468	11.7219	3.3371	0.00610993	22.4346	0.688802	-0.040805	-0.130174	0.219724	0.0191557	0.220461	0.368511	-0.476183	2.63906	0.3571	0	0.565852	1.04005	1	2.94444	0.721346	0.0025	0.0835979	0.0946997
37	2013	D	0	0	深圳市	0.0169876	0	3	3	69.28	1	59.77	3	66.13	5	75.7	0.261589	2.45951	-4.07792	-0.977825	0.0425042	0.00775533	5.74939	1.03207	10.237	0.0194	11.7297	3.42302	0.00917099	22.4171	0.669176	0.01337	0.041662	0.202331	0.0886495	0.236902	0.347834	-0.122501	2.70805	0.4	0	0.564234	1.02674	1	2.99573	0.5667	0.003	0.0928214	0.272296
37	2014	D	0	0	深圳市	0.0170912	0	3	3	69.96	1	56.47	3	66.13	5	78.67	0.205653	2.31559	-4.11789	-0.994958	#N/A	0.00596277	5.71043	1.03989	10.445	0.0314	11.915	3.44766	0.00591183	22.3439	0.727446	-0.080336	-0.265351	0.235141	0.112978	0.254076	0.363843	0.111375	2.70805	0.4	0	0.497799	1.39052	1	3.04452	0.5052	0.0029	0.0763903	0.261324
37	2015	D	0	0	深圳市	0.0104263	0	3	3	69.41	1	56.47	3	66.13	5	77.54	0.050386	2.37841	-4.15711	-0.983323	#N/A	0.00670007	6.39192	1.10955	11.076	0.0448	11.9703	5.15504	0.0122448	22.2449	0.880147	-0.172126	-0.860716	0.279157	0.0843808	0.146879	0.364093	0.089876	2.70805	0.4	0	0.410588	2.13088	1	3.09104	0.446625	0.0029	0.113343	0.0119677
37	2017	D	0	1	深圳市	0.000208958	0	3	3	69.06	1	55.89	2	63.25	5	78.81	0.67028	1.29998	-4.22233	-0.954148	0.000185982	0.0134447	6.2519	1.28451	10.61	0.0391	12.1202	4.69248	0.0156436	21.7824	0.298029	0.000104	0.000186	0.564544	0.0682431	0.0269904	0.49262	0.299651	2.19722	0.3333	0	0.408617	1.41933	1	3.17805	0.416367	0.0031	0.0484029	0.0074894
37	2018	D	0	1	深圳市	0.011141	0	3	3	67.11	1	57.25	2	63.25	4	74.11	0.502458	-0.769207	-4.26863	-0.953785	0.00615106	0.0121353	6.25383	1.32152	10.854	0.0519	12.1525	4.8295	0.0229123	21.9194	0.384122	0.004023	0.006133	0.608933	0.0715309	0.0377238	0.425034	-0.078616	2.19722	0.3333	0	0.409814	1.06135	1	3.21888	0.4147	0.0031	0.0496195	0.0941626
37	2019	D	0	1	深圳市	0.00748821	0	3	3	69.56	1	57.25	3	69.02	5	75.76	0.591154	0.916435	-4.30751	0	0.00665613	0.0100401	6.24611	1.38968	11.342	0.0787	12.2234	5.034	0.0203671	21.8924	0.359328	0.007874	0.012535	0.374656	0.0630405	0.0387314	0.42919	-0.351396	2.19722	0.3333	0	0.422535	2.00837	1	3.2581	0.444901	0.0031	0.0895991	0.0845306
37	2020	D	0	1	深圳市	0.015727	0	3	3	69.16	1	57.25	3	66.13	5	76.65	0.66001	0.319411	-4.34464	0	0.0336289	0.0102713	5.99894	1.42588	11.673	0.0643	11.9786	5.71698	0.012166	21.8288	0.308885	0.02177	0.032733	0.315782	0.0863092	0.0331848	0.306454	-0.194118	2.19722	0.3333	0	0.419996	1.83095	1	3.29584	0.4347	0.0031	0.113289	0.0783307
37	2021	D	0	1	深圳市	0.0144224	0	3.75	4	70.41	2	63.35	3	68.75	5	78.98	0.377275	1.0376	-4.38057	0	#N/A	0.00926207	5.97126	1.36837	12.014	0.0511	12.0649	5.91092	0.0124654	21.7493	0.434287	-0.175328	-0.277899	0.260608	-0.0140711	0.0317208	0.230558	-0.231492	2.19722	0.3333	0	0.419181	1.60929	1	3.3322	0.4378	0.0029	0.136411
37	2022	D	0	1	深圳市	0.00729507	0	4	4	71.16	2	64.51	3	69.56	5	79.25	0.432996	0.903872	-4.41664	-0.940845	#N/A	0.00702705	5.94542	1.35959	12.364	0.0329	12.1187	6.1461	0.0141639	21.6812	0.465578	-0.06876	-0.124882	0.257302	0.0794901	0.0327215	0.226877	-0.083135	2.19722	0.3333	0	0.418349	1.74268	1	3.3673	0.431012	0.0029	0.113939
37	2023	D	0	1	深圳市	0.00871197	0	3.5	4	70.23	2	63.93	3	69.97	5	77.22	0.761196	2.99126	-4.4396	-0.928265	#N/A	0.00938491	5.64897	1.3905	12.725	0.0663	12.1819	6.30369	0.0131461	21.4408	0.321344	-0.000862	-0.001441	0.253365	-0.0489771	0.0420414	0.278858	-0.150451	2.19722	0.3333	0	0.414057	1.88835	1	3.4012	0.426448	0	0.0989023	0.0402674
39	2009	C	0	0	深圳市	0	0	5	5	77.02	4	70.67	3	69.97	7	85.02	0.128133	2.83772	-3.67302	-1.1095	0.0505282	0.0300733	10.7057	0.930005	9.244	0	11.4379	3.48536	0.009652	24.3438	0.576357	0.030055	0.070265	0.569426	0.0259563	0.180778	0.205979	-0.567364	2.07944	0.375	0	0.515782	1.33728	1	2.89037	0.5801	0.0311	0.0965092	0.0209969
39	2010	C	0	0	深圳市	0	0	5	5	76.56	3	67.3	4	72.24	6	84.2	0.07798	1.33347	-3.64464	-1.15347	0.111006	0.0413125	11.0565	0.90881	9.835	0.0341	11.5795	3.54004	0.0104203	24.7147	0.645179	0.062321	0.162751	1.13168	0.0273948	0.247988	0.184858	1.5283	1.94591	0.4286	0	0.509846	1.57297	1	2.94444	0.626791	0.0311	0.0528193	0.0204378
39	2011	C	0	0	深圳市	0	0	5	5	79	3	69.09	6	80	6	83.38	0.057386	3.11544	-3.64867	-1.14193	0.126918	0.0421006	11.0749	0.931098	9.888	0.0154	11.6121	3.34599	0.0061263	24.8878	0.664184	0.061758	0.17927	1.08235	0.0350276	0.240335	0.169129	0.238693	2.07944	0.375	0	0.517152	1.07048	1	2.99573	0.573177	0.0187	0.058748	0.0130696
39	2012	C	0	0	深圳市	0	0	5	5	77.23	2	64.48	4	73.68	7	86.14	0.057068	3.72872	-3.69328	-1.14685	0.0633722	0.0335665	10.9774	0.985526	9.936	0.0468	11.7219	3.3371	0.00610993	24.8663	0.648892	0.030316	0.088287	0.853275	0.0356062	0.2863	0.184288	-0.152686	2.07944	0.375	0	0.717407	1.06301	1	3.04452	0.761705	0	0.0684783	0.007223
39	2013	C	0	0	深圳市	0	0	5	5	78.41	3	67.85	4	74.95	7	86.14	0.04622	2.45205	-3.70211	-1.15185	0.0848368	0.038634	10.9628	1.03207	10.237	0.0194	11.7297	3.42302	0.00917099	25.0083	0.662616	0.038857	0.113036	0.853615	0.0378747	0.219825	0.186046	0.065159	1.94591	0.4286	0	0.725343	1.09597	1	3.09104	0.764284	0.0187	0.0698331	0.0128337
39	2014	C	0	0	深圳市	0	0	3.75	3	69.92	1	59.25	2	64.26	5	79.18	0.039594	1.9185	-3.69775	-1.17309	0.0879467	0.0293357	11.025	1.03989	10.445	0.0314	11.915	3.44766	0.00591183	25.1981	0.689185	0.037834	0.117189	0.873799	0.0733055	0.191093	0.217042	0.21074	2.07944	0.375	0	0.712656	1.16523	1	3.13549	0.755452	0.0317	0.0664538	0.0095798
39	2015	C	1	0	深圳市	0	0	4.75	5	79.54	4	70.67	6	80.65	6	83.32	0.01907	3.11025	-3.68874	-1.1647	0.0477254	0.0304754	10.9591	1.10955	11.076	0.0448	11.9703	5.15504	0.0122448	25.3939	0.667536	0.023357	0.072382	0.603331	-0.0338152	0.153767	0.20464	-0.162479	1.94591	0.4286	0	0.748537	1.1072	1	3.17805	0.792518	0.0368	0.0706642	0.0127012
39	2016	C	1	1	深圳市	0	0	5	5	77.36	4	70.67	4	73.6	6	83.32	0.012071	2.78786	-3.6877	-1.15951	0.0144192	0.0750143	10.8454	1.2159	10.49	0.0818	12.0282	4.85968	0.0207014	25.5485	0.685954	0.006345	0.019637	0.441242	0.0187909	0.139707	0.176843	-0.129063	2.07944	0.375	0	0.76641	1.01499	1	3.21888	0.797011	0.0303	0.0823413	0.0063643
39	2017	C	1	1	深圳市	0	0	4.5	4	73.46	3	65.98	3	66.54	6	81.94	0.015509	3.09097	-3.71484	-1.17855	0.0575538	0.0632424	10.8335	1.28451	10.61	0.0391	12.1202	4.69248	0.0156436	25.5954	0.668943	0.024751	0.076686	0.597917	0.0327353	0.147455	0.175653	0.492809	2.07944	0.375	0	0.767239	1.08098	1	3.2581	0.801665	0.0224	0.0718487	0.0114687
39	2018	C	1	1	深圳市	0	0	4.75	5	78.87	4	70.27	5	78.78	6	83.32	0.007098	3.20015	-3.69908	-1.1832	0.0485573	0.0709709	10.8445	1.32152	10.854	0.0519	12.1525	4.8295	0.0229123	25.7914	0.670181	0.028108	0.085078	0.645951	0.000885753	0.172046	0.145948	0.225396	2.07944	0.375	0	0.764379	0.944346	1	3.29584	0.788272	0.0316	0.0551778	0.03447
39	2019	C	1	1	深圳市	0	0	5.5	6	81.28	4	70.27	7	85.36	6	84.14	0.020109	3.31136	-3.71538	-1.18688	0.0392757	0.044109	10.8141	1.38968	11.342	0.0787	12.2234	5.034	0.0203671	25.8714	0.680212	0.015167	0.046725	0.518535	0.0205599	0.23998	0.219916	-0.082166	2.07944	0.375	0	0.765373	0.951001	1	3.3322	0.79876	0.0316	0.060645	0.0225859
39	2020	C	1	1	深圳市	0	0	5.5	6	80.06	4	72.06	6	83.01	6	82.15	0.020826	2.25164	-3.80313	-1.18818	0.102463	0.0461492	10.8415	1.42588	11.673	0.0643	11.9786	5.71698	0.012166	25.7083	0.631672	0.037772	0.110417	0.591602	0.0876161	0.10582	0.241511	0.097229	2.19722	0.3333	1	0.759816	1.0001	1	3.3673	0.806002	0.0315	0.0520007	0.0209374
39	2021	C	1	1	深圳市	0.239221	0	5.25	5	77.15	5	77.72	4	71.09	6	80.52	0.030774	0.95631	-3.82757	-1.20197	0.115073	0.0309717	10.8541	1.36837	12.014	0.0511	12.0649	5.91092	0.0124654	25.7623	0.630773	0.055639	0.15087	1.08937	0.133322	0.128543	0.226768	0.738504	2.19722	0.3333	1	0.738692	1.01303	1	3.4012	0.784069	0.0315	0.0354368
39	2022	C	1	1	深圳市	0.194115	0	6	6	84.35	6	80.16	8	93.03	6	82.17	0.008685	1.87124	-3.88374	-1.18511	0.0615061	0.0222942	10.8502	1.35959	12.364	0.0329	12.1187	6.1461	0.0141639	25.7062	0.570554	0.030652	0.076919	0.942879	0.100188	0.125645	0.268694	-0.135369	2.07944	0.375	1	0.723457	0.92777	1	3.43399	0.742637	0.0315	0.0495423
39	2023	C	1	1	深圳市	0.155434	0	6.5	7	85.42	6	80.49	8	91.43	7	85.47	0.030832	3.09203	-3.8938	-1.12522	0.0296865	0.0282457	10.8323	1.3905	12.725	0.0663	12.1819	6.30369	0.0131461	25.8094	0.600464	0.012113	0.029278	0.830841	0.0167108	0.118693	0.249469	-0.096986	2.19722	0.3333	0	0.714409	0.938323	1	3.46574	0.761754	0.0315	0.0508975	0.0280736
40	2009	S	0	0	深圳市	0	0	3.25	3	69.31	1	55.76	5	76.57	4	71.48	0.473773	3.47181	-5.50137	-1.00689	0.0519824	0.0490868	8.12563	0.930005	9.244	0	11.4379	3.48536	0.009652	21.7642	0.641099	0.019353	0.05095	0.268491	0.0773108	0.445832	0.0717834	1.18511	2.48491	0.3333	0	0.400075	1.7718	0	2.77259	0.418326	0.1291	0.186035	0.0274785
40	2010	K	0	0	深圳市	0	0	3.75	4	71.92	1	55.76	4	71.35	5	79.97	0.638765	0.742006	-5.52788	-0.941629	0.116785	0.0191394	7.99159	0.90881	9.835	0.0341	11.5795	3.54004	0.0104203	21.5489	0.613091	0.035769	0.095825	0.300907	0.235287	0.2795	0.0459448	0.115532	2.48491	0.3333	0	0.361753	1.60691	0	2.83321	0.363483	0.1291	0.145546	0.0411135
40	2011	K	0	0	深圳市	0	0	3.25	3	67.83	1	55.76	2	63.86	5	75.94	0.589081	5.2788	-5.55266	-0.963316	0.147094	0.0153314	6.52942	0.931098	9.888	0.0154	11.6121	3.34599	0.0061263	21.3589	0.477982	0.067351	0.150315	0.391877	-0.225038	0.483143	0.0399575	0.051669	2.3979	0.3636	0	0.363232	1.33211	0	2.89037	0.369583	0.1185	0.0894958	0.0325532
40	2012	K	0	0	深圳市	0	0	3	3	65.67	1	50.54	1	53.37	6	80.19	0.557203	6.23062	-5.62205	-0.981872	0.177181	0.0288453	6.83948	0.985526	9.936	0.0468	11.7219	3.3371	0.00610993	21.777	0.593918	0.081615	0.180522	0.361984	-0.1111	0.713713	0.0313992	0.05324	2.3979	0.3636	0	0.36435	1.42068	0	2.94444	0.3654	0.1185	0.0921816	0.0029692
40	2013	K	0	0	深圳市	0	0	1.75	2	62	1	50.54	5	78.29	1	57.83	0.514057	5.06039	-5.67445	-0.989504	0.0806486	0.0196831	6.95464	1.03207	10.237	0.0194	11.7297	3.42302	0.00917099	22.0997	0.683762	0.030126	0.085108	0.238723	-0.119087	0.784239	0.0183318	-0.053173	2.3979	0.3636	0	0.394383	1.17623	0	2.99573	0.3897	0.0426	0.100439	0.0086773
40	2014	K	0	0	深圳市	0	0	3	3	67.34	1	51.9	5	77.12	3	68.91	0.458855	3.16156	-5.71605	-1.02966	0.0357473	0.0207406	6.99026	1.03989	10.445	0.0314	11.915	3.44766	0.00591183	22.1748	0.702902	0.012886	0.042184	0.251191	-0.0159551	0.734613	0.0166184	0.271648	2.3979	0.3636	0	0.42012	1.4208	0	3.04452	0.41749	0	0.0759003	0.0412567
40	2015	K	0	0	深圳市	0	0	3	3	67.11	1	50.54	2	62.02	5	78.05	0.206148	-0.237489	-5.75526	-1.02019	0.0452198	0.0109277	7.37776	1.10955	11.076	0.0448	11.9703	5.15504	0.0122448	22.6356	0.804167	0.011241	0.047835	0.301797	0.0282192	0.498298	0.00989225	0.607018	2.3979	0.3636	1	0.376043	1.83098	0	3.09104	0.413145	0	0.0584843	0.0397395
40	2016	K	0	1	深圳市	0.0437331	0	3.25	3	69.84	1	51.9	3	67.79	5	79.62	0.200312	-3.07109	-5.73727	-1.10862	0.0144919	0.00548574	7.45876	1.2159	10.49	0.0818	12.0282	4.85968	0.0207014	23.5733	0.365806	0.014577	0.028535	0.313715	-0.0163905	0.159676	0.0116486	1.26538	2.3979	0.3636	1	0.510604	1.10993	0	3.13549	0.785019	0	0.0414787	0.0636717
40	2017	E	0	1	深圳市	0.142763	0	3.75	4	72.54	1	54.04	4	74.23	6	80.38	0.100238	0.209477	-5.7134	-1.14718	0.0438054	0.011404	7.96589	1.28451	10.61	0.0391	12.1202	4.69248	0.0156436	24.0872	0.600067	0.023378	0.047945	0.352057	0.00528476	0.0450272	0.0946786	1.15477	2.3979	0.3636	1	0.508555	1.19119	0	3.17805	0.739968	0	0.0403699	0.0441681
40	2018	D	0	1	深圳市	0.134906	0	4.75	5	76.49	2	63.13	6	84.11	5	78.36	0.059436	3.24552	-5.72651	-1.10375	0.0748672	0.0296084	7.72533	1.32152	10.854	0.0519	12.1525	4.8295	0.0229123	24.262	0.576703	0.035576	0.086216	0.274017	-0.111357	0.100079	0.163757	0.06706	2.3979	0.3636	1	0.535955	0.920839	0	3.21888	0.653287	0	0.0363314	0.0277634
40	2019	D	0	1	深圳市	0.160393	0	4.25	4	71.02	2	63.13	3	69.69	5	75.58	0.126527	2.33033	-5.78301	-1.03444	#N/A	0.021	6.73578	1.38968	11.342	0.0787	12.2234	5.034	0.0203671	24.1568	0.563673	-0.029265	-0.068143	0.208095	0.0187297	0.0801059	0.187852	-0.215591	2.19722	0.4444	1	0.466307	0.831874	0	3.2581	0.50221	0	0.0395535	0.0274398
40	2020	D	0	1	深圳市	0.171683	0	3.25	3	68.34	3	66.04	3	69.69	3	68.63	0.109534	2.46304	-5.84736	-1.03497	#N/A	0.0242056	6.34914	1.42588	11.673	0.0643	11.9786	5.71698	0.012166	23.9891	0.534554	-0.036406	-0.080961	0.121403	0.0209051	0.00368073	0.201514	-0.489928	2.19722	0.3333	1	0.442608	0.809312	0	3.29584	0.454772	0	0.0494683	0.0165977
40	2021	D	0	1	深圳市	0.276355	0	2.75	3	68.58	4	72.09	4	73.01	2	62.42	0.14318	2.5414	-5.88761	-1.02974	#N/A	0.0210645	6.05209	1.36837	12.014	0.0511	12.0649	5.91092	0.0124654	23.9872	0.557142	-0.023063	-0.050781	0.148096	0.00985556	0.00328354	0.2064	0.116752	2.19722	0.3333	1	0.433557	0.84271	0	3.3322	0.4271	0	0.043913
40	2022	D	0	1	深圳市	0.265438	0	3.75	4	73.53	5	77.61	4	73.5	3	69.12	0.082866	2.57739	-5.93121	-1.02857	#N/A	0.0168695	6.09131	1.35959	12.364	0.0329	12.1187	6.1461	0.0141639	23.9609	0.557906	-0.011956	-0.02702	0.117622	0.0345896	0.00352917	0.212204	-0.216811	2.07944	0.375	1	0.434185	0.837492	0	3.3673	0.421363	0	0.0347996	0.0091739
42	2009	K	0	0	深圳市	0.15349	0	5	5	76.36	1	59.84	5	76.22	6	81.93	0.363201	1.69295	-4.15612	-1.06014	0.125759	0.00307633	7.10168	0.930005	9.244	0	11.4379	3.48536	0.009652	22.5921	0.680323	0.044449	0.140234	0.339286	0.146151	0.494611	0.021908	0.791309	2.19722	0.3333	0	0.657972	1.50512	0	2.77259	0.694994	0.0526	0.0559735	0.0110784
42	2010	K	0	0	深圳市	0.0326669	0	4.25	4	73.98	1	55.11	4	74.97	5	79.26	0.290253	1.48691	-4.1952	-1.01142	0.100777	0.00403868	7.13887	0.90881	9.835	0.0341	11.5795	3.54004	0.0104203	22.6387	0.648746	0.05456	0.162462	0.218127	-0.027151	0.527688	0.0168551	-0.290771	2.19722	0.3333	0	0.659826	1.26053	0	2.83321	0.693831	0.0526	0.0892408	0.011006
42	2011	K	0	0	深圳市	0.090796	0	4.75	5	77.25	1	54.89	6	82.9	5	79.26	0.343466	4.04559	-4.23397	-1.04533	0.0968678	0.00453159	7.01661	0.931098	9.888	0.0154	11.6121	3.34599	0.0061263	22.69	0.646232	0.045789	0.129882	0.275056	-0.0165666	0.571124	0.0135438	0.32436	2.19722	0.3333	0	0.693809	1.10686	0	2.89037	0.745803	0.0377	0.0679837	0.0199523
42	2012	K	0	0	深圳市	0.0549202	0	4.5	4	73.86	1	53.09	5	75.38	5	79.26	0.355037	2.82972	-4.27254	-1.04783	0.1099	0.00409843	7.02376	0.985526	9.936	0.0468	11.7219	3.3371	0.00610993	22.7404	0.613915	0.056134	0.151686	0.367737	0.0483403	0.589456	0.00941599	0.407689	2.19722	0.3333	0	0.703278	1.25418	0	2.94444	0.79913	0.0377	0.0513406	0.0125015
42	2013	K	0	0	深圳市	0.108847	0	4.5	4	74.25	1	53.09	5	79.14	5	76.59	0.360114	2.19629	-4.31048	-1.02918	0.122074	0.011689	7.04752	1.03207	10.237	0.0194	11.7297	3.42302	0.00917099	22.8025	0.616542	0.052273	0.135868	0.285272	0.020724	0.691515	0.0106646	-0.179849	2.07944	0.375	0	0.689961	1.38289	0	2.99573	0.72872	0.0377	0.0747512	0.0090611
42	2014	K	0	0	深圳市	0.090817	0	4	4	73.71	1	53.09	5	79.73	4	74.81	0.159559	4.99289	-4.30375	-1.08044	0.0762234	0.00229595	7.10414	1.03989	10.445	0.0314	11.915	3.44766	0.00591183	23.5081	0.796201	0.025263	0.095989	0.250702	-0.100339	0.832609	0.0050498	0.370459	2.19722	0.3333	1	0.643869	1.24944	0	3.04452	0.68676	0.0377	0.0511452	0.0121521
42	2015	K	0	0	深圳市	1	0	4.25	5	75.98	1	54.67	6	81.81	5	77.48	0.106366	2.90102	-4.29577	-1.07385	0.0498732	0.00281434	7.41938	1.10955	11.076	0.0448	11.9703	5.15504	0.0122448	23.9269	0.771898	0.019584	0.089612	0.247238	-0.034394	0.664116	0.0592101	0.664409	2.19722	0.3333	1	0.653205	1.2424	0	3.09104	0.708229	0.6822	0.0473411	0.0061555
42	2017	K	0	1	深圳市	1	0	4	4	74.87	2	62.32	7	86.41	3	68.08	0.039939	5.25526	-4.28588	-1.11884	0.0742724	0.00605218	7.74673	1.28451	10.61	0.0391	12.1202	4.69248	0.0156436	24.4988	0.842186	0.016732	0.095551	0.237814	-0.118846	0.648268	0.0319146	0.06635	2.19722	0.3333	1	0.672472	1.06573	0	3.17805	0.739704	0.4896	0.0409739	0.0095775
42	2018	K	0	1	深圳市	1	0	4.25	4	70.31	2	60.52	6	83.9	2	60.67	0.037968	2.94444	-4.3159	-1.12025	0.0476192	0.00906962	7.8411	1.32152	10.854	0.0519	12.1525	4.8295	0.0229123	24.553	0.833525	0.009255	0.057037	0.17714	0.06518	0.55993	0.0272326	-0.082286	2.19722	0.3333	0	0.699929	0.995526	0	3.21888	0.762972	0.3162	0.0576601	0.0091847
42	2019	K	0	1	深圳市	1	0	3.25	3	68.53	1	57.14	6	83.4	1	58.22	0.124378	4.44465	-4.3596	-1.11125	0.0800349	0.0135627	7.87816	1.38968	11.342	0.0787	12.2234	5.034	0.0203671	24.5331	0.822497	0.014772	0.085918	0.158197	-0.0186655	0.720973	0.0249084	-0.091782	2.19722	0.3333	0	0.680205	0.98251	0	3.2581	0.737075	0.3162	0.072026	0.0133442
42	2020	K	0	1	深圳市	1	0	3.25	4	70.35	1	57.14	6	81.73	2	63.93	0.135357	3.82882	-4.40247	-1.14262	0.0157027	0.00771624	7.81964	1.42588	11.673	0.0643	11.9786	5.71698	0.012166	24.5175	0.815569	0.003571	0.019737	0.238812	0.0276239	0.694843	0.0242514	0.482985	2.07944	0.375	0	0.726229	0.952447	0	3.29584	0.7584	0.1728	0.0327633	0.0354291
42	2021	K	0	1	深圳市	1	0	4	4	70.59	3	68.08	5	75.38	3	68.96	0.209322	4.14307	-4.4551	-1.1179	0.00538308	0.0133194	7.86672	1.36837	12.014	0.0511	12.0649	5.91092	0.0124654	24.4475	0.801428	0.001521	0.007955	0.202048	0.00347241	0.68747	0.0251961	-0.18892	2.07944	0.375	0	0.71977	0.930832	0	3.3322	0.776829	0.1728	0.0404557
42	2022	K	0	1	深圳市	1	0	4	4	71.58	3	68.08	5	75.03	4	71.74	0.097197	4.58223	-4.51606	-1.12927	0.000125069	0.0121391	7.90064	1.35959	12.364	0.0329	12.1187	6.1461	0.0141639	24.3257	0.77605	0.000231	0.001095	0.181325	0.0266794	0.711017	0.0264239	-0.183618	2.07944	0.375	1	0.694307	0.92004	0	3.3673	0.724046	0.1688	0.0381644
42	2023	K	0	1	深圳市	1	0	4	4	70.18	3	68.08	5	75.38	3	67.91	0.236784	4.7061	-4.58321	-1.06382	#N/A	0.0169537	7.80303	1.3905	12.725	0.0663	12.1819	6.30369	0.0131461	24.1555	0.819805	-0.062571	-0.306824	0.225353	0.0436874	0.701212	0.0298288	0.07589	2.07944	0.375	1	0.650651	0.943196	0	3.4012	0.656442	0.1659	0.0372492	0.0149979
45	2009	C	0	0	深圳市	0	0	4	4	71.49	1	45.76	3	67.84	7	87.09	0.624098	3.9889	-4.08566	-0.904827	0.0835082	0.0280495	6.64639	0.930005	9.244	0	11.4379	3.48536	0.009652	20.5033	0.385411	0.055564	0.083507	0.713373	0.0589856	0.0527117	0.274291	0.340296	1.94591	0.4286	0	0.609447	4.07943	1	2.77259	0.616829	0.0667	0.0922003	0.0482471
45	2010	C	0	0	深圳市	0	0	4	4	72.61	1	45.76	4	72.67	7	86.27	0.682369	-2.65375	-4.2203	-0.901696	0.0311884	0.0181313	6.79122	0.90881	9.835	0.0341	11.5795	3.54004	0.0104203	21.2273	0.186933	0.033124	0.044268	0.518963	0.0343681	0.0368406	0.100568	0.306774	2.19722	0.3333	0	0.68882	2.54866	1	2.83321	0.737295	0.0297	0.113565	0.0504202
45	2011	S	0	0	深圳市	0	0	4	4	70.85	1	45.76	3	67.51	7	85.91	0.676517	1.92822	-4.26876	-0.921715	0.0370375	0.0114678	6.69456	0.931098	9.888	0.0154	11.6121	3.34599	0.0061263	21.3156	0.242557	0.028245	0.036026	0.411643	0.0153471	0.0395834	0.278797	0.117736	2.19722	0.3333	0	0.624554	1.67396	1	2.89037	0.630047	0.0297	0.105884	0.0404328
45	2012	F	0	0	深圳市	0.036123	0	2.25	1	57.87	1	45.76	1	26.66	7	85.09	0.682789	3.77204	-4.31231	-0.923856	#N/A	0.0271549	7.11233	0.985526	9.936	0.0468	11.7219	3.3371	0.00610993	21.3549	0.307152	-0.04391	-0.060606	0.458195	-0.0824984	0.0761744	0.504697	0.185471	2.19722	0.3333	0	0.600216	1.31927	1	2.94444	0.596	0.0297	0.147614	0.0298548
45	2013	F	0	0	深圳市	0.0332032	0	2.25	3	65.42	2	61.52	1	48.64	5	78.73	0.739906	0.090083	-4.38174	-0.950037	0.0209819	0.0491873	7.29641	1.03207	10.237	0.0194	11.7297	3.42302	0.00917099	21.7712	0.194236	0.019957	0.026229	0.478021	-0.0654775	0.0714684	0.307966	0.338397	2.19722	0.3333	0	0.606068	1.35145	1	2.99573	0.73257	0.0184	0.126512	0.0124692
45	2014	F	0	0	深圳市	0.0340898	0	3.25	4	70.13	1	55.88	1	57.51	7	85.91	0.597333	-0.095528	-4.4212	-0.957904	#N/A	0.0148234	7.28961	1.03989	10.445	0.0314	11.915	3.44766	0.00591183	21.761	0.221956	-0.040035	-0.050551	0.426802	-0.017253	0.0817134	0.292219	0.070599	2.07944	0.375	0	0.524182	1.73926	1	3.04452	0.530869	0.0184	0.0986794	0.0204614
45	2015	C	1	0	深圳市	0.0306475	0	3.75	4	71.77	2	61.52	2	61.81	6	83.72	0.688672	0.262773	-4.46381	-0.959429	0.00392308	0.0151996	7.15383	1.10955	11.076	0.0448	11.9703	5.15504	0.0122448	21.8116	0.267673	0.002903	0.003888	0.419119	0.0133308	0.103986	0.266054	0.013043	2.07944	0.375	1	0.548044	2.39025	1	3.09104	0.558862	0.0184	0.0839983	0.0209389
45	2016	C	1	1	深圳市	0.0302369	0	4	4	71.49	1	59.94	1	57.11	7	87.09	0.704401	0.070636	-4.51535	-0.953845	#N/A	0.0163299	7.13569	1.2159	10.49	0.0818	12.0282	4.85968	0.0207014	22.139	0.164936	-0.024621	-0.031087	0.338046	-0.0134151	0.0687864	0.175669	-0.02327	1.94591	0.4286	1	0.519015	1.79837	1	3.13549	0.524329	0.0184	0.0892186	0.016938
45	2017	C	1	1	深圳市	0.0342799	0	4	4	72.07	2	61.33	2	62.94	6	83.72	0.641194	-0.099616	-4.55572	-0.957549	0.0213554	0.00308074	7.19669	1.28451	10.61	0.0391	12.1202	4.69248	0.0156436	22.1573	0.160336	0.017717	0.021158	0.354898	-0.00679705	0.0656892	0.156381	0.231468	2.19722	0.3333	0	0.509447	1.28986	1	3.17805	0.493624	0.1631	0.0775012	0.0167517
45	2018	C	1	1	深圳市	0.0343901	0	4	4	73.66	2	61.88	3	67.64	6	83.73	0.445597	1.35403	-4.59721	0	#N/A	0.00321417	7.19818	1.32152	10.854	0.0519	12.1525	4.8295	0.0229123	22.2535	0.251066	-0.014136	-0.017845	0.288682	-0.0996913	0.095201	0.213863	-0.137704	2.19722	0.3333	0	0.508921	0.865684	1	3.21888	0.497085	0.1645	0.069627	0.0071855
45	2019	C	1	1	深圳市	0.0233175	0	3.5	4	70.05	2	62.91	3	65.29	5	76.9	0.516227	-1.32644	-4.63698	0	#N/A	0.00274546	7.19893	1.38968	11.342	0.0787	12.2234	5.034	0.0203671	22.2343	0.149354	-0.004049	-0.005066	0.471703	0.0845535	0.0864452	0.199327	0.69621	2.07944	0.375	0	0.509871	0.942106	1	3.2581	0.491595	0.1068	0.0448853	0.0097488
45	2020	C	1	1	深圳市	0.0354499	0	4	4	70.6	2	61.33	3	65.29	5	78.92	0.490085	0.494603	-4.67781	-1.02949	0.00730146	0.00105945	7.22184	1.42588	11.673	0.0643	11.9786	5.71698	0.012166	22.3266	0.215358	0.009156	0.01122	0.443948	0.000388553	0.0967588	0.159005	-0.022806	2.19722	0.3333	0	0.509589	0.902737	1	3.29584	0.493372	0.0636	0.0498325	0.0317834
45	2021	C	1	1	深圳市	0.303474	0	3.5	4	71.64	2	64.19	3	65.8	5	79.73	0.533693	0.97171	-4.71783	-1.02144	0.0127207	0.0255039	7.39695	1.36837	12.014	0.0511	12.0649	5.91092	0.0124654	22.4274	0.278864	0.01425	0.019106	0.435158	-0.000807216	0.121431	0.441131	0.087618	2.19722	0.3333	0	0.521249	1.09931	1	3.3322	0.511358	0.019	0.0532268
45	2022	C	1	1	深圳市	0.253628	0	4	4	71.12	2	64.19	3	66.1	5	78.36	0.475894	-0.005652	-4.75778	-1.05409	0.0206095	0.00188459	7.36201	1.35959	12.364	0.0329	12.1187	6.1461	0.0141639	22.4491	0.282367	0.019997	0.027998	0.507659	0.0872755	0.0994186	0.398819	0.237271	2.19722	0.3333	0	0.519261	1.21636	1	3.3673	0.505261	0.019	0.0452394
45	2023	C	1	1	深圳市	0.188854	0	4	4	73.25	2	64.19	4	70.48	5	79.97	0.582829	0.702438	-4.79775	-1.04769	0.0234491	0.00056998	7.25559	1.3905	12.725	0.0663	12.1819	6.30369	0.0131461	22.4549	0.272204	0.022568	0.031226	0.546674	0.0327031	0.130339	0.365676	0.085162	2.19722	0.3333	0	0.519677	1.25457	1	3.4012	0.511539	0.019	0.0436316	0.0016997
46	2009	K	0	0	北京市	0.108706	0	5.25	6	81.74	2	64.28	8	90.86	5	78.86	0.192868	3.4281	-3.86603	-1.09005	0.0184635	0.0149303	7.75577	3.67187	8.658	0.1022	11.1627	6.34372	0.0103931	23.8474	0.602118	0.018345	0.044096	0.111788	-0.0675268	0.683495	0.00474181	0.675884	2.63906	0.3571	0	0.831613	1.20198	0	3.04452	0.865555	0.001	0.0472391	0.0165499
46	2010	K	0	0	北京市	0.352467	0	5.5	6	80.3	2	62.48	7	88.03	5	78.86	0.171258	3.0465	-3.90822	-1.05311	0.000666042	0.0147622	7.80384	3.59039	8.907	0.1076	11.2377	6.3922	0.0126768	23.8299	0.626553	0.0053	0.01374	0.072089	-0.108571	0.782518	0.00436647	-0.316882	2.63906	0.3571	0	0.834925	1.10667	0	3.09104	0.84562	0.6575	0.0897998	0.0137768
46	2011	K	0	0	北京市	0.663298	0	5	5	77.87	2	62.25	6	81.51	5	79.57	0.15678	5.41678	-3.9422	-1.08873	-0.00328995	0.00989817	7.95753	3.7861	8.868	0.1104	11.3103	6.25619	0.0112648	23.8776	0.638528	0.010723	0.029194	0.087486	-0.0572212	0.874354	0.00443194	0.232322	2.63906	0.3571	0	0.820306	1.47574	0	3.13549	0.846506	0.3275	0.0811232	0.0078551
46	2012	K	0	0	北京市	0.913548	0	5.25	5	79.09	1	58.88	7	88.96	5	76.42	0.053198	5.13276	-3.94326	-1.12404	0.037305	0.0115681	8.02552	3.89531	8.895	0.1063	11.3791	6.28623	0.0111829	24.1551	0.710283	0.02862	0.089255	0.163518	-0.055151	0.770576	0.00449581	1.21971	2.63906	0.3571	0	0.819611	1.50457	0	3.17805	0.860467	0.3187	0.051981	0.0146627
46	2013	K	0	0	北京市	0.957263	0	6	6	82.7	3	67.43	7	89.28	6	81.5	0.087985	3.49756	-3.93811	-1.10502	0.054113	0.00551574	8.23244	4.03198	9.282	0.1207	11.4426	6.25535	0.0120342	24.4304	0.763096	0.0329	0.126687	0.165684	-0.0693676	0.746896	0.00329551	0.335652	2.70805	0.3333	0	0.82618	1.26475	0	3.21888	0.846406	0.3187	0.054206	0.0085612
46	2014	K	0	0	北京市	0.452628	0	6	6	82.84	3	69.01	8	90.54	6	80.11	0.020674	2.29998	-3.86748	-1.14033	0.0850212	0.00416901	8.74751	4.13578	9.212	0.1277	11.5129	6.23469	0.0132537	24.9844	0.823456	0.026686	0.130561	0.097208	0.0102665	0.52024	0.00784743	0.021046	2.70805	0.3333	0	0.808989	1.45861	0	3.2581	0.835079	0.1909	0.216727	0.0144181
46	2015	K	0	0	北京市	0.721713	0	6	6	82.27	2	63.83	7	89.12	6	81.86	0.007857	1.18809	-3.78161	-1.13865	0.149875	0.0025526	9.22808	4.57462	9.192	0.1279	11.5759	7.43604	0.0125049	25.497	0.87189	0.028047	0.190169	0.099615	-0.00150929	0.436341	0.00583579	0.558338	2.83321	0.3529	0	0.834764	1.35451	0	3.29584	0.854066	0.0478	0.25622	0.0115089
46	2016	K	0	1	北京市	0.788059	0	5	5	78.05	2	60.45	7	89.12	4	73.37	0.004536	3.28573	-3.72289	-1.18377	0.100703	0.0138377	9.20322	4.76782	9.171	0.1254	11.6801	7.37893	0.0111332	25.8463	0.851677	0.021068	0.142336	0.128333	-0.0907382	0.398275	0.00527441	0.971084	2.89037	0.3333	0	0.757239	1.12197	0	3.3322	0.853925	0.0754	0.199935	0.0066531
46	2017	K	0	1	北京市	0.690179	0	5	5	78.69	3	66.75	7	85.36	5	76.3	0.004715	4.72538	-3.72894	-1.16066	0.0918544	0.00264781	9.26132	4.89399	9.236	0.1371	11.7675	7.18669	0.0129116	25.9585	0.85357	0.017393	0.118061	0.047157	-0.102559	0.450081	0.00546185	-0.549727	2.89037	0.3333	0	0.775821	1.05884	0	3.3673	0.811612	0.0339	0.495427	0.0064695
46	2018	K	0	1	北京市	0.783728	0	5	5	79.71	2	63.15	7	88.96	5	76.42	0.002323	2.72876	-3.73087	-1.1711	0.00900302	0.00736619	9.2272	5.02215	9.239	0.1438	11.8509	7.50581	0.0140459	26.0803	0.865957	0.005167	0.036945	0.025045	0.0434073	0.436795	0.00444684	-0.402812	2.89037	0.3333	0	0.784127	0.980811	0	3.4012	0.81721	0.505	0.791044	0.0547725
46	2019	K	0	1	北京市	0.843331	0	5	5	77.93	2	63.15	7	85.78	5	75.37	0.015222	2.54057	-3.82546	-1.16555	0.0281637	0.0130001	9.23024	5.23404	9.512	0.1348	12.009	6.72657	0.0122534	25.9043	0.813872	0.007316	0.046362	0.015516	0.0313276	0.341016	0.00548708	-0.395795	2.56495	0.4615	0	0.778707	0.947008	0	3.43399	0.794923		1.61793	0.0324806
48	2012	C	0	0	深圳市	0.0237642	0	3.5	3	68.51	1	56.03	2	60.91	6	80	0.16038	5.34045	-4.38505	-0.907375	0.0652762	0.0402879	7.25276	0.985526	9.936	0.0468	11.7219	3.3371	0.00610993	20.9153	0.592418	0.024476	0.062938	1.17544	-0.0207717	0.10814	0.264498	0.09292	2.3979	0.3636	1	0.34764	2.71981	0	2.94444	0.3428	0	0.0788642	0.0600111
48	2013	C	0	0	深圳市	0.0121749	0	2.25	2	61.75	1	57.82	3	69.96	1	58.22	0.119179	5.29543	-4.4365	-0.912358	#N/A	0.0221345	7.27863	1.03207	10.237	0.0194	11.7297	3.42302	0.00917099	21.0089	0.636463	-0.007818	-0.020332	1.23141	-0.0571214	0.230319	0.289626	0.077031	2.3979	0.3636	1	0.339002	3.81837	0	2.99573	0.2809	0	0.0842695	0.0689647
48	2014	C	0	0	深圳市	0	0	2	2	63.48	1	59.4	3	68.83	2	61.96	0.364674	-1.16379	-4.51688	-0.972153	0.248025	0.0227797	7.2937	1.03989	10.445	0.0314	11.915	3.44766	0.00591183	21.4078	0.695063	0.072533	0.220821	1.29435	0.256338	0.241288	0.183497	0.369964	2.3979	0.3636	0	0.485673	2.7284	0	3.04452	0.302062	0	0.074481	0.092566
48	2015	C	1	0	深圳市	0.0156533	0	2	2	64.31	1	54.24	3	68.83	3	66.41	0.23335	0.526054	-4.55505	-0.951411	0.354011	0.023826	7.38709	1.10955	11.076	0.0448	11.9703	5.15504	0.0122448	21.3864	0.58659	0.106927	0.298186	1.17338	0.159754	0.106339	0.174782	0.073496	2.3979	0.3636	0	0.480742	7.75998	0	3.09104	0.4242	1.8345	0.0898987	0.133308
48	2017	C	1	1	深圳市	0.0242043	0	2.5	3	65.16	1	56.51	4	70.45	3	66.01	0.044681	0.065451	-4.67409	-0.954017	#N/A	0.00594964	7.35372	1.28451	10.61	0.0391	12.1202	4.69248	0.0156436	22.0855	0.818492	-0.047321	-0.180814	0.528472	0.0841835	0.409616	0.15967	-0.007441	2.3979	0.3636	0	0.69167	2.80086	0	3.17805	0.683621	1.8345	0.124848	0.0809211
48	2019	C	1	1	深圳市	0.0984271	0	1	1	52.78	1	48.68	3	66.47	1	45.65	0.288427	-2.55096	-4.75614	0	0.31164	0.0118353	6.61473	1.38968	11.342	0.0787	12.2234	5.034	0.0203671	22.5907	0.632612	0.198764	0.642913	0.84409	0.156646	0.384894	0.0781497	0.431134	2.3979	0.3636	0	0.78097	1.97762	0	3.2581	0.734908	0.0209	0.049504	0.0098848
48	2020	C	1	1	深圳市	0.209869	0	1	1	55.5	1	52.05	2	63	1	52.21	0.219436	-4.89131	-4.78084	-1.05483	0.109274	0.00805816	7.17396	1.42588	11.673	0.0643	11.9786	5.71698	0.012166	23.0162	0.719174	0.107197	0.340268	0.49726	0.182361	0.263107	0.0543408	-0.172244	2.3979	0.3636	0	0.790316	1.64974	0	3.29584	0.753789	0	0.0466872	0.099245
48	2021	C	1	1	深圳市	0.201969	0	2.5	3	68.06	2	60.85	6	81.39	3	65.43	0.084397	-2.29337	-4.79191	-1.07949	-0.0281905	0.00473367	7.73762	1.36837	12.014	0.0511	12.0649	5.91092	0.0124654	23.4201	0.827464	0.032227	0.149274	0.260465	0.178035	0.289803	0.215462	-0.208775	2.3979	0.3636	0	0.807455	1.4381	0	3.3322	0.762107	0	0.0718136
48	2022	C	1	1	深圳市	0.19131	0	3.25	3	68.51	2	60.7	5	77.06	3	69.78	0.052652	2.91796	-4.81581	-1.11931	0.114188	0.00441995	7.979	1.35959	12.364	0.0329	12.1187	6.1461	0.0141639	23.5875	0.848175	0.049189	0.304927	0.370461	0.0582327	0.34759	0.275016	0.861153	2.3979	0.3636	0	0.754908	1.38078	0	3.3673	0.779084	0	0.035633
48	2023	C	1	1	深圳市	0.189735	0	4	5	77.49	4	74.73	6	82.04	5	76.22	0.26089	5.12337	-4.88809	-1.04911	0.322334	0.00334397	8.02682	1.3905	12.725	0.0663	12.1819	6.30369	0.0131461	23.2188	0.677847	0.118498	0.535071	0.837177	-0.0341899	0.236867	0.498996	1.071	2.3979	0.3636	0	0.699089	1.47182	0	3.4012	0.779482	0.3016	0.0207415	0.10765
49	2009	C	0	0	深圳市	0.0376362	0	3	3	67.96	2	60.51	1	53.04	6	81.82	0.626198	4.82886	-3.93091	-0.897588	#N/A	0.031416	8.0067	0.930005	9.244	0	11.4379	3.48536	0.009652	20.2996	0.734349	-0.062425	-0.204965	1.44699	0.0210922	0.116039	0.178788	0.155946	2.19722	0.3333	0	0.518307	2.02589	1	2.70805	0.5102	0.0411	0.0757713	0.0086167
49	2010	C	0	0	深圳市	0.0386605	0	3.25	3	69.96	2	64.37	2	62.58	5	77.8	0.786775	2.57835	-4.01487	-0.939897	0.3622	0.0208922	8.34117	0.90881	9.835	0.0341	11.5795	3.54004	0.0104203	20.5611	0.672747	0.11651	0.387778	1.74888	0.0914699	0.111867	0.151245	0.436244	2.19722	0.3333	0	0.497113	4.9052	1	2.77259	0.496025	0.0411	0.0854447	0.0124635
49	2011	C	0	0	深圳市	0.0526708	0	3	3	68.75	1	53.98	2	64.8	5	78.95	0.217525	5.27567	-4.12396	-0.990174	0.391267	0.0047281	8.58204	0.931098	9.888	0.0154	11.6121	3.34599	0.0061263	21.0734	0.698867	0.138379	0.445064	1.97948	-0.00659655	0.141833	0.0926164	0.706906	2.19722	0.3333	0	0.521842	2.70457	1	2.83321	0.563017	0.0308	0.0751173	0.0172005
49	2012	C	0	0	深圳市	0.0801961	0	3.5	4	70.41	1	57.14	2	64.8	6	80.97	0.012175	2.44541	-4.19138	-1.03025	0.300141	0.00282223	8.42727	0.985526	9.936	0.0468	11.7219	3.3371	0.00610993	21.3445	0.750595	0.104086	0.382973	1.94798	0.18382	0.0997967	0.06045	0.422429	2.07944	0.375	0	0.582601	2.99792	1	2.89037	0.746974	0	0.0687642	0.0138518
49	2013	C	0	0	深圳市	0.0395193	0	3	3	69.68	1	58.93	2	60.42	6	81.41	0.015024	4.44889	-4.26938	-1.02994	0.308752	0.00281275	8.56827	1.03207	10.237	0.0194	11.7297	3.42302	0.00917099	21.9385	0.806481	0.105129	0.492641	1.6828	0.0163429	0.156978	0.0352202	0.377834	2.19722	0.3333	0	0.568848	3.65583	1	2.94444	0.808132	0	0.0494797	0.0157427
49	2014	C	0	0	深圳市	0.0113085	0	3.75	4	72.7	1	57.14	4	72.17	6	81	0.144027	1.71285	-4.31734	-1.0526	0.338612	0.0260478	8.70963	1.03989	10.445	0.0314	11.915	3.44766	0.00591183	22.2656	0.803558	0.077766	0.398358	1.58813	0.0318248	0.152305	0.0347421	0.451357	2.19722	0.3333	0	0.481415	2.12573	1	2.99573	0.480876	0	0.0332538	0.0196594
49	2015	C	1	0	深圳市	0.0278646	0	4	4	71.68	1	57.14	4	71.31	5	79.36	0.407858	1.49169	-4.34973	-1.05491	0.301257	0.00904247	8.74973	1.10955	11.076	0.0448	11.9703	5.15504	0.0122448	21.9478	0.647972	0.076278	0.291166	2.08814	0.188048	0.196189	0.0522766	0.319987	2.19722	0.3333	0	0.532772	4.07295	1	3.04452	0.647116	0	0.0307473	0.0239309
49	2016	C	1	1	深圳市	0.146698	0	3.25	3	68.22	1	55.35	2	61.45	5	79.36	0.319156	2.53506	-4.39794	-1.03079	0.248286	0.00959064	9.07004	1.2159	10.49	0.0818	12.0282	4.85968	0.0207014	22.3614	0.708479	0.081814	0.259228	2.04119	0.0166277	0.192668	0.0440996	0.034411	2.19722	0.3333	0	0.532362	2.38567	1	3.09104	0.674105	0	0.0377802	0.0284099
49	2017	C	1	1	深圳市	0.137699	0	3.75	4	70.64	1	57.98	3	67.28	5	79.36	0.225628	5.17241	-4.43212	-1.04862	0.207921	0.00549862	9.26729	1.28451	10.61	0.0391	12.1202	4.69248	0.0156436	22.7539	0.761753	0.056996	0.219447	1.9563	-0.0548167	0.247957	0.0866833	0.431154	2.19722	0.3333	0	0.516712	1.82824	1	3.13549	0.641807	0	0.040141	0.0050515
49	2018	C	1	1	深圳市	0.113862	0	4	4	71.07	1	55.16	4	70.82	5	79.36	0.311999	4.3108	-4.46654	-1.06578	0.264926	0.0205803	9.2653	1.32152	10.854	0.0519	12.1525	4.8295	0.0229123	22.9005	0.743297	0.063939	0.257663	2.09831	0.0138481	0.289407	0.0778159	0.381489	2.19722	0.3333	0	0.518657	1.41053	1	3.17805	0.607583	0	0.0108444	0.0094308
49	2019	C	1	1	深圳市	0.0254166	0	3.25	3	67.83	1	56.95	1	57.74	6	80.18	0.389664	1.19701	-4.5068	-1.07934	0.224614	0.0182034	9.18441	1.38968	11.342	0.0787	12.2234	5.034	0.0203671	22.8946	0.673751	0.076152	0.261354	2.09669	0.181818	0.22982	0.0980514	0.069189	2.19722	0.3333	0	0.520379	1.63025	1	3.21888	0.559292	0.0724	0.01172	0.0077012
49	2020	C	1	1	深圳市	0.0197019	0	3	3	67.47	1	56.95	1	55.39	6	81	0.433972	1.63524	-4.54544	-1.07237	0.232863	0.0161521	9.1935	1.42588	11.673	0.0643	11.9786	5.71698	0.012166	22.9248	0.687771	0.083133	0.260497	2.17838	0.141843	0.187993	0.102593	0.051789	2.19722	0.3333	0	0.560977	2.22562	1	3.2581	0.770966	0.0724	0.0115578	0.0179185
49	2021	C	1	1	深圳市	0.0408193	0	3.75	4	72.45	2	64.19	4	70.8	5	77.94	0.411904	3.09897	-4.57595	-1.05267	0.19881	0.0111781	9.2653	1.36837	12.014	0.0511	12.0649	5.91092	0.0124654	23.1007	0.681789	0.079954	0.253994	1.96081	0.0445776	0.239685	0.0791009	0.003765	2.19722	0.3333	0	0.496361	2.29905	1	3.29584	0.653351	0.0724	0.0138619
49	2022	C	1	1	深圳市	0.0366983	0	4	4	70.35	2	64.19	3	69.88	4	73.9	0.284043	3.57437	-4.60579	-1.07893	0.184417	0.0108734	9.31236	1.35959	12.364	0.0329	12.1187	6.1461	0.0141639	23.2502	0.662442	0.07319	0.222728	1.86756	0.0312384	0.232902	0.155688	0.117009	2.19722	0.3333	0	0.503337	1.70237	1	3.3322	0.613362	0.0355	0.018135
49	2023	C	1	1	深圳市	0.0660802	0	4	4	72.55	2	64.19	4	71.1	5	77.94	0.258298	-1.11349	-4.62194	-1.10068	0.0559553	0.0033787	9.30009	1.3905	12.725	0.0663	12.1819	6.30369	0.0131461	23.5267	0.613504	0.035204	0.096404	1.39737	0.175848	0.126659	0.207088	-0.067323	2.19722	0.3333	0	0.489838	1.24558	1	3.3673	0.508628	0.0359	0.0165322	0.04827
50	2009	C	0	0	深圳市	0.087558	0	4	4	72.38	1	57.45	2	62.45	7	86.69	0.306434	2.62979	-4.19613	-1.00962	#N/A	0.00142478	8.70996	0.930005	9.244	0	11.4379	3.48536	0.009652	22.5914	0.675933	-0.053899	-0.151345	0.380971	0.0673368	0.042879	0.527545	0.591603	2.19722	0.3333	0	0.620006	1.14439	1	3.29584	0.629207	0.017	0.0781839	0.0226509
50	2010	C	0	0	深圳市	0.19429	0	3.5	4	70.29	1	55.88	2	64	6	81.9	0.326069	2.41757	-4.23059	-0.968989	0.0598309	0.00309453	8.91919	0.90881	9.835	0.0341	11.5795	3.54004	0.0104203	22.7991	0.687553	0.019464	0.061274	0.478171	0.0445896	0.0623626	0.62661	0.576943	2.07944	0.375	0	0.593425	1.41608	1	3.3322	0.698207	0.0039	0.0728549	0.212905
50	2011	C	0	0	深圳市	0.202733	0	4	4	71.89	1	45.76	4	73.31	6	84.28	0.20793	3.8849	-4.27023	-0.991252	0.0967272	0.00517262	9.01128	0.931098	9.888	0.0154	11.6121	3.34599	0.0061263	22.8092	0.6375	0.032132	0.095177	0.576018	0.0661881	0.0548581	0.568052	0.336041	1.94591	0.4286	0	0.589156	1.08107	1	3.3673	0.610238	0.0039	0.0740948	0.217044
50	2012	C	0	0	深圳市	0.20571	0	4	4	71.93	2	61.52	3	65.15	6	81.82	0.239674	3.30458	-4.31133	-1.06385	0.0349155	0.00623535	8.87961	0.985526	9.936	0.0468	11.7219	3.3371	0.00610993	22.7778	0.608351	0.017065	0.046045	0.537602	0.104694	0.0656152	0.565474	-0.06098	1.94591	0.4286	0	0.587959	1.19044	1	3.4012	0.626156	0.0039	0.0844172	0.206289
50	2013	C	0	0	深圳市	0.210396	0	4	4	70.03	2	60.77	1	58.11	6	82.79	0.203344	0.852275	-4.35057	-1.06654	0.0746056	0.00914168	8.91985	1.03207	10.237	0.0194	11.7297	3.42302	0.00917099	22.7998	0.588088	0.03619	0.090049	0.5728	0.178229	0.0644555	0.499792	0.042883	2.19722	0.3333	0	0.555613	1.40083	1	3.43399	0.570861	0.0039	0.0994313	0.0193559
50	2014	C	1	0	深圳市	0	0	4	4	71.6	2	64.14	3	65.95	5	79.21	0.270914	0.741689	-4.34676	-1.13063	0.0718328	0.00538897	9.49552	1.03989	10.445	0.0314	11.915	3.44766	0.00591183	23.4764	0.454445	0.049973	0.106491	0.678192	0.0883023	0.0960734	0.498074	1.06275	2.19722	0.3333	0	0.557967	1.4243	1	3.46574	0.679663	0.002	0.107351	0.0115575
50	2015	C	1	0	深圳市	0	0	4.25	5	75.33	2	62.14	4	70.65	7	85.22	0.137678	-4.02363	-4.35223	-1.13021	0.0369033	0.00123332	9.49281	1.10955	11.076	0.0448	11.9703	5.15504	0.0122448	23.7973	0.387465	0.029773	0.050948	0.564291	0.206165	0.0641256	0.316504	0.129542	2.07944	0.375	0	0.557967	1.4144	1	3.49651	0.689718	0.0106	0.120654	0.0093164
50	2017	C	1	1	深圳市	0	0	4.75	5	75.69	3	66.9	4	70.33	6	83.79	0.075613	1.07669	-4.38963	-1.1121	0.0515142	0.0118485	9.7136	1.28451	10.61	0.0391	12.1202	4.69248	0.0156436	24.1128	0.511848	0.031451	0.05718	0.54596	0.0647911	0.054056	0.223326	0.305096	2.19722	0.3333	0	0.442602	1.44314	1	3.55535	0.551748	0.0073	0.111534	0.0077044
50	2018	C	1	1	深圳市	0	0	5	5	76.72	2	63.53	5	75.03	6	84.59	0.018742	2.19495	-4.30343	-1.17454	0.0334013	0.0010077	10.6094	1.32152	10.854	0.0519	12.1525	4.8295	0.0229123	24.8182	0.566855	0.017143	0.038973	0.503738	0.0593837	0.0520515	0.487196	1.06327	2.19722	0.3333	0	0.563037	0.932635	1	3.58352	0.68821	0.0031	0.0265301	0.0096402
50	2019	C	1	1	深圳市	0	0	4.25	4	73.72	2	61.95	5	75.03	5	78.85	0.043781	2.3182	-4.32505	-1.15344	0.0255556	0.00186256	10.5927	1.38968	11.342	0.0787	12.2234	5.034	0.0203671	24.9046	0.591951	0.013218	0.031468	0.482627	0.0727362	0.0510077	0.431558	0.047401	2.19722	0.3333	0	0.565625	1.09082	1	3.61092	0.682959	0.0031	0.0360401	0.0032131
50	2020	C	1	1	深圳市	0	0	4	4	72.85	2	63.53	3	67.98	6	80.9	0.03611	1.53039	-4.33916	-1.15115	0.0403673	0.000729221	10.5317	1.42588	11.673	0.0643	11.9786	5.71698	0.012166	25.0213	0.543647	0.021215	0.048926	0.420588	0.0907705	0.0471575	0.363044	-0.034649	2.19722	0.3333	0	0.500218	1.0269	1	3.63759	0.660556	0.0021	0.0337382	0.0029091
50	2021	C	1	1	深圳市	0	0	5	5	77.34	4	73.92	5	76.44	5	79.78	0.048479	2.25972	-4.35856	-1.14148	0.0409049	0.0017349	10.196	1.36837	12.014	0.0511	12.0649	5.91092	0.0124654	25.1107	0.566435	0.020033	0.045074	0.413393	0.062823	0.0459324	0.302078	0.088821	2.3979	0.3636	0	0.500218	0.966506	1	3.66356	0.635212	0.0016	0.0317496
50	2022	C	1	1	深圳市	0	0	5	5	77.25	4	73.92	5	76.42	5	79.58	0.012964	2.88492	-4.39694	-1.09241	0.00357498	0.00251582	10.1574	1.35959	12.364	0.0329	12.1187	6.1461	0.0141639	25.1176	0.626341	0.001376	0.00357	0.401444	0.0483101	0.0599247	0.284324	-0.011993	2.48491	0.3333	0	0.500218	0.89284	1	3.68888	0.633701	0.0016	0.0348244
50	2023	C	1	1	深圳市	0	0	5	5	75.75	4	72.83	5	77.29	5	76.16	0.055578	3.15813	-4.43409	-1.09661	#N/A	0.00177208	10.1014	1.3905	12.725	0.0663	12.1819	6.30369	0.0131461	25.1297	0.646316	-0.025894	-0.071214	0.396051	0.0482786	0.0447205	0.56153	0.026197	2.48491	0.3333	0	0.51508	0.966762	1	3.71357	0.688408	0.0016	0.0262018	0.020277
55	2009	C	0	0	深圳市	0.0194629	0	4	4	74.23	2	61.07	3	66.35	7	86.27	0.571859	3.88766	-3.68881	-0.93477	0.0545222	0.023543	7.68478	0.930005	9.244	0	11.4379	3.48536	0.009652	21.1172	0.518206	0.025665	0.055059	0.634369	0.0314934	0.134184	0.174837	0.163445	1.94591	0.4286	1	0.192775	2.48905	0	2.77259	0.1841	0.0203	0.0751726	0.0172688
55	2010	C	0	0	深圳市	0.0208582	0	4	4	74.6	2	61.07	3	69.96	6	84.63	0.643256	1.41394	-3.75723	-0.899861	0.0461611	0.0197047	7.73587	0.90881	9.835	0.0341	11.5795	3.54004	0.0104203	21.412	0.450407	0.027799	0.053392	0.668936	-0.0156629	0.140765	0.120811	0.272683	1.94591	0.4286	1	0.172722	2.13967	0	2.83321	0.16933	0.0184	0.0811917	0.0058523
55	2011	C	0	0	深圳市	0.0239042	0	4.75	5	75.14	1	59.49	4	72.9	6	84.63	0.530592	4.0287	-3.80387	-0.925807	0.0543435	0.02469	7.98037	0.931098	9.888	0.0154	11.6121	3.34599	0.0061263	21.4949	0.46746	0.028586	0.052867	0.649311	-0.0263694	0.117606	0.14643	0.160804	1.94591	0.4286	1	0.160496	1.49188	0	2.89037	0.133478	0.0184	0.0783043	0.0038823
55	2012	C	0	0	深圳市	0.0370648	0	5	5	76.27	2	62.32	5	76.87	6	82.99	0.486974	3.41848	-3.84925	-1.01218	-0.013846	0.0246325	7.96555	0.985526	9.936	0.0468	11.7219	3.3371	0.00610993	21.5682	0.502397	0.002869	0.005578	0.622517	0.0254584	0.115611	0.146729	0.036422	1.94591	0.4286	1	0.205494	1.59402	0	2.94444	0.1885	0.0184	0.0877586	0.0040197
55	2013	C	0	0	深圳市	0.0360292	0	4.25	4	71.12	1	59.49	3	66.47	6	80.18	0.478238	1.80975	-3.89649	-1.01803	0.0507123	0.0255039	7.6406	1.03207	10.237	0.0194	11.7297	3.42302	0.00917099	21.6786	0.5322	0.03304	0.068566	0.709354	0.0602197	0.16485	0.17808	0.250175	1.94591	0.4286	1	0.222575	1.75116	0	2.99573	0.1987	0.1373	0.0728157	0.0554006
55	2014	C	0	0	深圳市	0	0	4	4	70.05	1	59.49	2	61.28	6	81.36	0.372428	5.2706	-3.95227	-1.01308	0.0568701	0.0133646	8.01268	1.03989	10.445	0.0314	11.915	3.44766	0.00591183	22.0215	0.644927	0.029602	0.073662	0.619048	-0.152317	0.268227	0.133702	0.109122	1.94591	0.4286	1	0.232003	2.17292	0	3.04452	0.203507	0.1373	0.0787199	0.0779807
55	2015	C	1	0	深圳市	0.0338661	0	4	4	73.57	1	59.49	4	73.9	6	80.54	0.365591	3.52792	-3.99677	-1.04085	-0.00557248	0.0118939	7.75234	1.10955	11.076	0.0448	11.9703	5.15504	0.0122448	22.2193	0.701165	0.016788	0.051785	0.627663	-0.0806683	0.301646	0.103637	0.31581	1.94591	0.4286	1	0.246483	2.50963	0	3.09104	0.302457	0.1712	0.0656373	0.0758574
55	2016	C	1	1	深圳市	0.0442234	0	3.25	3	69.04	1	57.91	2	60.42	6	80.54	0.439474	-0.832251	-4.03521	-1.06634	0.197559	0.00845419	7.76174	1.2159	10.49	0.0818	12.0282	4.85968	0.0207014	22.6383	0.660779	0.116608	0.360795	0.747274	0.0686185	0.293297	0.0746744	0.648273	1.94591	0.4286	1	0.258692	1.84302	0	3.13549	0.292392	0.1642	0.0408962	0.124061
55	2017	C	1	1	深圳市	0.0574477	0	4.5	5	76.79	2	63.37	5	78.96	6	82.17	0.554088	0.867939	-4.07209	-1.03229	0.412523	0.00748488	7.67322	1.28451	10.61	0.0391	12.1202	4.69248	0.0156436	22.7548	0.575245	0.159729	0.415447	0.409017	0.0731544	0.107484	0.0613892	-0.298867	1.94591	0.4286	1	0.25041	1.3761	0	3.17805	0.299246	0.1596	0.0518467	0.141476
55	2018	C	1	1	深圳市	0.0326229	0	4.25	4	71.4	1	48.98	4	72.41	6	82.17	0.330003	0.389582	-4.09663	-1.06221	0.369242	0.0131337	7.69894	1.32152	10.854	0.0519	12.1525	4.8295	0.0229123	23.0897	0.512594	0.245694	0.532637	0.333476	0.0363175	0.0611141	0.0427132	0.034338	1.94591	0.4286	1	0.249558	0.903842	0	3.21888	0.261081	0.1652	0.0459224	0.0016414
55	2019	C	1	1	深圳市	0.145996	0	4.75	5	75.93	2	60.4	5	77.2	6	83.01	0.288146	2.48952	-4.13253	-1.07155	0.0588171	0.0123085	7.78114	1.38968	11.342	0.0787	12.2234	5.034	0.0203671	23.1542	0.53991	0.031483	0.066516	0.272892	-0.000464806	0.0645306	0.0419819	-0.014082	1.94591	0.4286	1	0.256653	0.943638	0	3.2581	0.24819	0.1699	0.0567059	0.0133521
55	2020	C	1	1	深圳市	0.147072	0	5	5	77.96	2	60.4	6	83.75	6	83.01	0.267742	2.01159	-4.16963	-1.00996	0.075366	0.0136637	7.71646	1.42588	11.673	0.0643	11.9786	5.71698	0.012166	23.197	0.540957	0.03286	0.071503	0.256429	0.0462388	0.0706027	0.0407152	-0.008801	1.94591	0.4286	1	0.253554	0.884892	0	3.29584	0.244485	0.282	0.0475849	0.0148778
55	2021	C	1	1	深圳市	0.157303	0	4.25	4	73.88	2	62.22	5	77.38	6	81.04	0.290688	2.61454	-4.2073	-1.05943	0.0319493	0.0134646	7.99261	1.36837	12.014	0.0511	12.0649	5.91092	0.0124654	23.2297	0.543997	0.01878	0.041043	0.294599	-0.00517279	0.0598043	0.0541062	0.194149	1.94591	0.4286	1	0.262858	0.88868	0	3.3322	0.250604	0.2858	0.047627
55	2022	C	1	1	深圳市	0.16135	0	4	4	74.47	2	61.04	5	78.87	6	82.51	0.216012	2.75757	-4.24442	-1.0782	0.0416004	0.0121912	7.97831	1.35959	12.364	0.0329	12.1187	6.1461	0.0141639	23.2684	0.543327	0.022886	0.050152	0.307678	0.0173565	0.0557491	0.0507496	0.081302	1.94591	0.4286	1	0.266098	0.855185	0	3.3673	0.249076	0.4767	0.0408472
55	2023	C	1	1	深圳市	0.0723961	0	4.25	4	74.97	2	61.04	5	78.21	6	84	0.292719	2.57841	-4.28065	-1.08652	0.0326929	0.0108485	8.05643	1.3905	12.725	0.0663	12.1819	6.30369	0.0131461	23.3168	0.548846	0.021205	0.046724	0.328633	0.0224084	0.0564896	0.0464124	0.115735	1.94591	0.4286	0	0.279734	0.825576	0	3.4012	0.248295	0.4759	0.0406958	0.0482248
56	2009	F	0	0	深圳市	0	0	4	4	71.87	1	51.51	4	72.63	5	77.85	0.133928	6.81511	-4.12648	-0.904251	#N/A	0.00569806	5.63835	0.930005	9.244	0	11.4379	3.48536	0.009652	21.096	0.906939	-0.010501	-0.095408	0.017607	-0.01975	0.928447	0.0461196	-0.161137	2.07944	0.375	0	0.408227	2.02828	0	2.83321	0.4456	0.1936	0.507429	0.0678657
56	2010	K	0	0	深圳市	0	0	3	3	67.63	1	51.51	4	74.71	3	66.23	0.301975	6.69283	-4.17293	-0.858635	#N/A	0.00258989	5.66988	0.90881	9.835	0.0341	11.5795	3.54004	0.0104203	21.1555	1.09739	-0.190392		0.012256	-0.391224	0.841107	0.0342554	-0.19309	2.07944	0.375	0	0.400308	2.35305	0	2.89037	0.3939		2.40467	0.408444
56	2011	K	0	0	深圳市	0	0	2.75	2	60.7	1	54.67	5	76.8	1	47.45	0.708129	9.42346	-4.21293	-0.887539	#N/A	0.00399822	5.80814	0.931098	9.888	0.0154	11.6121	3.34599	0.0061263	21.1556	1.2517	-0.138262		0.012633	-0.0983996	0.901066	0.0423704	0.062897	2.07944	0.375	0	0.396544	2.80435	0	2.94444	0.413284	0.2055	2.95253	0.0345133
56	2014	K	0	0	深圳市	1	0	4	4	70.38	1	55.11	5	78.89	3	67.35	0.253702	3.73769	-4.39103	-1.041	#N/A	0.0024139	6.33505	1.03989	10.445	0.0314	11.915	3.44766	0.00591183	22.7866	0.628363	-0.069256	-0.169789	0.012624	-0.0478883	0.00452561	0.007701	1.80336	2.07944	0.375	0	0.274741	0.983125	0	3.09104	0.269774	0.2587	0.742015	0.0104181
56	2015	K	0	0	深圳市	1	0	4	4	71.07	1	51.51	6	80.98	3	68.13	0.365158	1.73862	-4.43049	-1.00698	0.00772874	0.00439795	6.18826	1.10955	11.076	0.0448	11.9703	5.15504	0.0122448	22.8022	0.374701	0.004833	0.009793	0.033816	0.0185067	9.55423e-05	0.00716862	1.71166	1.60944	0.6	0	0.609698	1.48268	0	3.13549	0.683651	0.1195	0.194947	0.0059446
56	2016	K	0	1	深圳市	1	0	3.5	4	70.78	1	51.51	4	70.54	5	77.35	0.323046	2.06943	-4.45673	-0.987207	0.0215899	0.00337905	6.24028	1.2159	10.49	0.0818	12.0282	4.85968	0.0207014	23.0879	0.482337	0.012493	0.022156	0.034968	0.0027046	2.36679e-05	0.00511525	0.214515	2.19722	0.3333	0	0.609698	1.22203	0	3.17805	0.684455	0.1195	0.190544	0.0415365
56	2018	K	0	1	深圳市	1	0	4	4	71.26	1	55.57	6	80.98	3	67.23	0.204496	3.35052	-4.52138	-1.07398	0.0187558	0.0378402	6.58203	1.32152	10.854	0.0519	12.1525	4.8295	0.0229123	23.3076	0.561924	0.008382	0.020371	0.067042	0.0146009	0.00115381	0.00386177	0.351487	2.19722	0.3333	0	0.591548	0.93299	0	3.2581	0.623564	0.7758	0.133936	0.0395663
56	2019	L	0	1	深圳市	1	0	3.5	3	67.3	1	52.89	4	72.5	4	73.03	0.298207	3.06411	-4.56614	-1.01941	0.0139221	0.093647	6.42649	1.38968	11.342	0.0787	12.2234	5.034	0.0203671	23.2455	0.554071	0.005933	0.013427	0.073815	0.0241621	0.000612831	0.00372634	-0.000155	2.19722	0.3333	0	0.583371	0.903192	0	3.29584	0.602937	0.707	0.107266	0.0051738
56	2020	L	0	1	深圳市	0.070041	0	2.5	2	61.95	1	51.55	3	68.78	2	64.08	0.175637	2.92132	-4.61027	-1.00492	#N/A	0.0621294	6.86693	1.42588	11.673	0.0643	11.9786	5.71698	0.012166	23.1877	0.588872	-0.026327	-0.061556	0.056476	0.0404374	0.0034463	0.00378801	-0.277391	2.07944	0.375	0	0.563245	0.856241	0	3.3322	0.569919	0.7074	0.14427	0.0107232
56	2021	L	0	1	深圳市	0.0388751	0	3.5	4	71.73	3	65.5	4	74.22	4	74.74	0.149243	3.69742	-4.6551	-0.999455	#N/A	0.057574	6.72982	1.36837	12.014	0.0511	12.0649	5.91092	0.0124654	23.1144	0.690232	-0.110917	-0.306144	0.066518	0.037376	0.00328748	0.00364368	0.100157	2.07944	0.375	0	0.535029	1.20134	0	3.3673	0.5484	0.2952	0.135401
56	2022	L	0	1	深圳市	0.0898624	0	2.5	2	63.59	3	65.5	4	71.29	1	56.28	0.046082	4.8354	-4.69958	-1.00293	#N/A	0.0208949	6.66441	1.35959	12.364	0.0329	12.1187	6.1461	0.0141639	23.039	0.792816	-0.114015	-0.437832	0.062984	0.0380248	0.0106649	0.011112	-0.120936	2.19722	0.3333	0	0.457093	1.24144	0	3.4012	0.4489	0.0844	0.13279
56	2023	L	0	1	深圳市	0.0802691	0	2	2	63.84	3	65.5	4	73.01	1	55.63	0.139546	5.54264	-4.74677	-1.03779	#N/A	0.0234804	6.84694	1.3905	12.725	0.0663	12.1819	6.30369	0.0131461	22.8954	0.889474	-0.121426	-0.746568	0.123878	0.0356945	0.0103618	0.0128543	0.766811	2.19722	0.3333	0	0.309325	1.30735	0	3.43399	0.321539	1.0157	0.106421	0.0876822
58	2009	L	0	0	深圳市	0.137049	0	3	3	69.94	1	51.07	3	67.19	6	83.68	0.397643	1.93505	-3.59902	-0.829259	#N/A	0.00880624	5.86647	0.930005	9.244	0	11.4379	3.48536	0.009652	21.0304	0.186105	-0.212715	-0.256909	0.197147	0.0552432	0.00432985	0.139403	-0.089037	2.19722	0.3333	0	0.343336	3.32268	1	2.63906	0.337	0.006	0.145871	0.0296059
58	2010	L	0	0	深圳市	0.814593	0	3	3	69.68	1	55.11	2	64.64	6	82.18	0.722638	-0.492514	-3.64759	-0.902791	0.0572479	0.00740593	6.00141	0.90881	9.835	0.0341	11.5795	3.54004	0.0104203	21.106	0.199613	0.044977	0.05577	0.27772	0.0746753	0.00286842	0.0401577	0.354499	2.19722	0.3333	0	0.348566	2.52962	1	2.70805	0.3495	0.006	0.0963259	0.0083247
58	2012	L	0	0	深圳市	0.75617	0	4	4	70.95	1	48.17	5	77.39	6	81.17	0.72882	2.39022	-3.7452	-0.913877	0.0419573	0.0104735	5.70378	0.985526	9.936	0.0468	11.7219	3.3371	0.00610993	21.2776	0.211593	0.032371	0.041015	0.271687	-0.026419	0.00155979	0.0247984	0.061723	2.19722	0.3333	0	0.349997	1.75727	1	2.83321	0.3451	0.006	0.112101	0.0114104
58	2013	L	0	0	深圳市	0.878494	0	3.25	3	68.11	1	49.62	3	66.02	6	81.17	0.68064	2.5345	-3.80285	-0.913962	0.0534104	0.0117256	5.90808	1.03207	10.237	0.0194	11.7297	3.42302	0.00917099	21.4817	0.327471	0.037567	0.051848	0.308263	-0.057393	0.0459033	0.0196149	0.287944	2.19722	0.3333	0	0.337828	1.82337	1	2.89037	0.3088	0.0045	0.0782457	0.0058703
58	2014	L	0	0	深圳市	0.839832	0	3.75	4	73.27	1	51.07	6	80.15	6	82.84	0.648667	4.0567	-3.85785	-0.921361	0.0555337	0.0358557	6.00881	1.03989	10.445	0.0314	11.915	3.44766	0.00591183	21.7015	0.437771	0.032817	0.053681	0.28421	-0.160894	0.104628	0.0155687	0.140595	2.19722	0.3333	0	0.335021	2.07437	1	2.94444	0.319653	0.0045	0.066642	0.0740753
58	2016	L	0	1	深圳市	0.920539	0	4	4	72.15	1	52.52	5	77.39	6	81.17	0.712083	2.36324	-3.93526	-0.959294	0.0723773	0.0247946	6.59715	1.2159	10.49	0.0818	12.0282	4.85968	0.0207014	21.6587	0.309922	0.055097	0.08272	0.260466	-0.0471025	0.236277	0.0153758	-0.093252	2.19722	0.3333	0	0.326037	3.06806	1	3.04452	0.323943	0.0118	0.0892972	0.0689598
58	2017	L	0	1	深圳市	0.0610826	0	3.25	3	67.92	1	53	2	64.64	5	79.49	0.432063	2.04268	-3.99452	-1.08784	0.102553	0.013451	7.92407	1.28451	10.61	0.0391	12.1202	4.69248	0.0156436	22.6681	0.630906	0.04427	0.112944	0.284755	0.0725606	0.507838	0.00892445	1.94669	2.07944	0.375	0	0.580725	1.44415	1	3.09104	0.369542	0.018	0.0726939	0.0977746
58	2018	L	0	1	深圳市	0.100093	0	3.75	4	73.69	1	55.79	6	84.3	5	78.09	0.381214	1.96596	-4.03404	-1.04182	-0.00797812	0.0162136	7.7878	1.32152	10.854	0.0519	12.1525	4.8295	0.0229123	22.6873	0.656307	0.003335	0.009361	0.227439	0.0235233	0.37462	0.0083265	-0.189531	2.07944	0.375	0	0.579537	1.3127	1	3.13549	0.572737	0.017	0.0759615	0.044753
58	2019	L	0	1	深圳市	0.14555	0	4	4	71.68	1	56.08	5	75.7	5	78.93	0.510546	1.67496	-4.07684	-1.0528	0.0270394	0.00872289	7.93487	1.38968	11.342	0.0787	12.2234	5.034	0.0203671	22.5463	0.594452	0.015492	0.041596	0.224232	0.0695408	0.391422	0.00998006	-0.070096	2.07944	0.375	0	0.579696	1.47368	1	3.17805	0.57003	0.006	0.0896449	0.0479208
58	2020	L	0	1	深圳市	0.105032	0	4	4	73.66	1	55.69	6	84.3	5	78.09	0.462273	2.01874	-4.11752	-1.04244	0.00723612	0.012548	7.86902	1.42588	11.673	0.0643	11.9786	5.71698	0.012166	22.4865	0.574448	0.005022	0.012093	0.233524	0.0417673	0.369892	0.0404934	-0.059979	2.19722	0.3333	0	0.587639	1.43227	1	3.21888	0.568904	0.0148	0.0748901	0.0063346
58	2021	L	0	1	深圳市	0.0975614	0	4	4	73.11	3	67.55	5	75.64	5	75.55	0.530686	0.727289	-4.15777	-1.0509	0.0347728	0.00888121	9.3579	1.36837	12.014	0.0511	12.0649	5.91092	0.0124654	22.4518	0.54314	0.017242	0.039104	0.348005	0.133874	0.301471	0.0471199	0.421032	2.19722	0.3333	0	0.582614	1.4246	1	3.2581	0.567004	0.0134	0.0617447
58	2022	L	0	1	深圳市	0.109166	0	4	4	72.78	3	67.55	5	77.37	4	73.43	0.375724	2.9471	-4.19796	-1.03668	0.0114418	0.0123828	9.32741	1.35959	12.364	0.0329	12.1187	6.1461	0.0141639	22.3945	0.538946	0.007315	0.01594	0.333994	0.0418301	0.319898	0.0488493	-0.083147	2.19722	0.3333	0	0.581583	2.08266	1	3.29584	0.56732	0.0135	0.0655623
58	2023	L	0	1	深圳市	0.0942893	0	4	4	72.71	3	67.55	5	76.51	4	73.9	0.50745	2.19254	-4.23794	-1.05632	0.031679	0.0144341	9.21583	1.3905	12.725	0.0663	12.1819	6.30369	0.0131461	22.406	0.534449	0.021282	0.045934	0.364349	0.0673678	0.298534	0.0642956	0.06576	2.07944	0.375	0	0.585089	1.91732	1	3.3322	0.57285	0.0119	0.0737275	0.037057
59	2009	C	0	0	盘锦市	0	0	4.25	5	75.96	2	60.98	4	72.54	7	85.91	0.155545	4.38801	-3.54985	-1.09504	0.0249052	0.000867227	8.97828	0.761412	8.463	0.0685	10.8382	1.61489	0.00115429	23.8168	0.702672	0.010684	0.032971	0.148673	0.0178247	0.0154553	0.22771	-0.213504	2.19722	0.3333	0	0.57067	1.27538	1	2.56495	0.677959	0	0.170625	0.0360604
59	2010	C	0	0	盘锦市	0	0	5	5	77.35	2	63.39	4	74.39	7	86.48	0.154344	2.61893	-3.5656	-1.26065	0.0665068	0.000401112	9.18809	0.73039	8.539	0.0803	11.1121	1.38187	0.00104337	24.0018	0.750634	0.016985	0.062645	0.984861	0.0558229	0.15632	0.637145	7.29227	2.19722	0.3333	0	0.554441	1.22589	1	2.63906	0.939598	0	0.0430676	0.0335188
59	2011	C	0	0	盘锦市	7.73589e-05	0	5	5	78.78	4	70.45	6	80.54	6	81.84	0.050302	3.76661	-3.59527	-1.10902	0.105788	0.000292339	9.44169	0.729231	8.161	0.0908	11.2846	1.2966	0.00125205	24.0744	0.735552	0.030578	0.118896	1.36391	0.112025	0.154198	0.599101	0.569629	2.19722	0.3333	0	0.551218	1.05528	1	2.70805	0.615178	0.0005	0.0373364	0.0259556
59	2012	C	0	0	盘锦市	0.000813493	0	5.5	6	80.03	4	73.82	6	83.25	6	81.03	0.027623	5.81856	-3.61443	-1.04637	0.00270731	0.000321727	9.23474	0.79807	8.052	0.0691	11.3754	1.3732	0.0014876	24.2123	0.774421	0.00065	0.002669	1.17503	-0.0642221	0.196232	0.566702	-0.041226	2.19722	0.3333	0	0.546526	1.02403	1	2.77259	0.627362	0.0005	0.0350626	0.0487538
59	2013	C	0	0	盘锦市	0.000909003	0	5.25	5	77.9	4	73.82	4	73.14	6	83.2	0.041232	3.19907	-3.67574	-1.04944	#N/A	0.000188294	9.2556	0.87255	8.486	0.0802	11.5592	1.39906	0.00157995	24.0712	0.745773	-0.005294	-0.02216	1.35816	0.0640062	0.161502	0.589841	0.154107	2.07944	0.375	0	0.547208	0.956381	1	2.83321	0.566776	0.0005	0.0368481	0.260576
59	2014	C	0	0	盘锦市	0	0	4.75	4	74.78	3	68.04	4	74.18	5	78.62	0.045488	2.78493	-3.68569	-1.05727	#N/A	0.000313434	9.24522	0.994041	8.625	0.0816	11.4144	1.61544	0.00152582	24.267	0.725987	-0.047146	-0.177854	1.39416	0.00368519	0.17549	0.509679	0.057444	2.19722	0.3333	0	0.563516	1.13612	1	2.89037	0.600062	0.0003	0.0307365	0.253985
59	2016	C	0	1	盘锦市	0	0	3.75	4	72.72	1	50.38	4	73.72	6	83.46	0.049433	0.903844	-3.78113	-1.1139	0.155289	0.000169738	9.29054	1.35851	8.217	0.099	11.1578	2.49563	0.001247	24.1691	0.646672	0.060307	0.18207	0.949699	0.134643	0.115495	0.457287	-0.058409	1.94591	0.2857	1	0.500221	1.2218	1	2.99573	0.591974	0.0003	0.0548538	0.0207901
59	2017	C	0	1	盘锦市	0.0075552	0	4.25	5	76.37	1	58.7	6	81.67	6	81.82	0.081455	1.23968	-3.8231	-1.0396	0.181023	0.00030141	9.23337	1.37614	8.506	0.0993	11.2343	2.36901	0.00084106	24.1562	0.591054	0.062278	0.163476	1.08163	0.0957436	0.131074	0.451586	0.158392	2.19722	0.3333	1	0.488382	1.07288	1	3.04452	0.513791	0.0003	0.0481307	0.0143144
59	2018	C	0	1	盘锦市	0.00855361	0	4.75	5	76.21	2	62.27	6	81.67	5	79.63	0.066381	-0.021295	-3.85584	-1.11288	0.0556427	0.00100611	9.02377	1.37486	8.753	0.0985	11.3457	2.23911	0.000536587	24.2033	0.576934	0.035433	0.08514	1.15668	0.0731085	0.129628	0.416288	0.08808	2.19722	0.3333	0	0.506019	0.869618	1	3.09104	0.496614	0	0.0447727	0.0149325
59	2019	C	1	1	盘锦市	0.0101052	0	5	5	77.06	3	67.42	5	79.32	6	80.45	0.097541	0.466084	-3.9111	-1.12239	0.0499602	0.00197867	9.0652	1.39316	9.252	0.093	11.3962	2.62834	0.00044676	24.1029	0.51817	0.033002	0.075054	1.24612	0.0927639	0.127496	0.476198	0.079738	2.19722	0.3333	0	0.512627	0.849944	1	3.13549	0.49508	0	0.0386317	0.022181
59	2020	C	1	1	盘锦市	0.0183294	0	5	5	78.36	3	66.77	6	82.82	6	81.27	0.099293	0.290173	-3.95852	-1.1069	0.0157359	0.000627742	9.02786	1.4287	9.564	0.0873	11.4489	2.85758	0.00151817	24.0519	0.494189	0.01205	0.024417	1.06315	0.100884	0.101766	0.457726	-0.23154	2.19722	0.3333	0	0.514922	0.810643	1	3.17805	0.497771	0.0028	0.0431982	0.024953
59	2021	C	1	1	盘锦市	0.0151954	0	4.25	4	71.52	2	62.43	5	78.59	5	75.79	0.136946	-0.107982	-3.9775	-1.10335	0.0411681	0.000101529	8.99417	1.30697	9.886	0.095	11.5073	2.92193	0.0013102	24.1926	0.53655	0.031232	0.064643	1.28474	0.0873325	0.138992	0.376748	0.266608	2.19722	0.3333	0	0.505171	0.89911	1	3.21888	0.603182	0.0025	0.0429272
59	2022	C	1	1	盘锦市	0.0165461	0	4	4	72.5	3	65.31	5	78.94	5	75.37	0.059178	1.15788	-4.01501	-1.12324	0.0264829	0.000115423	9.02329	1.30808	10.219	0.0993	11.5164	3.01605	0.00149089	24.2086	0.537197	0.018285	0.040003	1.49324	0.0537558	0.156398	0.358592	0.272612	2.19722	0.3333	0	0.499446	0.870483	1	3.2581	0.577778	0	0.0227751
59	2023	C	1	1	盘锦市	0.0131809	0	4.75	5	76.64	4	70.35	7	85.81	5	76.96	0.18839	1.62353	-4.0586	-1.12092	0.00558004	0.000287461	8.96687	1.34849	10.563	0.0713	11.5101	3.36576	0.00114768	24.1855	0.530372	0.002576	0.005524	1.43041	0.030426	0.182426	0.325356	-0.059519	2.19722	0.3333	0	0.499849	0.805735	1	3.29584	0.568824	0	0.0214125	0.0318744
60	2009	C	0	0	深圳市	0.00390401	0	4.75	5	76.24	2	63.53	4	74.05	6	84.2	0.162241	4.1318	-4.13092	-1.08106	0.11601	0.00346455	9.23102	0.930005	9.244	0	11.4379	3.48536	0.009652	23.1783	0.594227	0.053104	0.120674	0.771239	0.0430672	0.25971	0.331486	0.014702	2.3979	0.3636	0	0.416796	3.04444	1	2.77259	0.680218	0.1395	0.0831864	0.031378
60	2010	C	0	0	深圳市	0.00167637	0	5	5	79.29	4	70.97	5	79.52	6	83.38	0.240178	2.06597	-4.15348	-1.06031	0.194998	0.00222871	9.21841	0.90881	9.835	0.0341	11.5795	3.54004	0.0104203	23.4023	0.6138	0.072469	0.183514	0.733903	0.133323	0.224312	0.289982	0.27407	2.3979	0.3636	0	0.42216	3.06206	1	2.83321	0.571694	0.1373	0.0702863	0.0329299
60	2011	C	0	0	深圳市	0.00264017	0	5	5	79.58	4	70.75	5	76.54	7	86.14	0.146081	3.58259	-4.19666	-1.10424	0.165311	0.00407934	9.31163	0.931098	9.888	0.0154	11.6121	3.34599	0.0061263	23.3653	0.525585	0.07644	0.177977	1.30247	0.0763546	0.170674	0.286983	0.936871	2.3979	0.3636	0	0.409754	1.73397	1	2.89037	0.468538	0.1089	0.0373927	0.0252241
60	2012	C	0	0	深圳市	0.00174584	0	5.25	5	79.03	4	70.75	4	74.74	7	86.14	0.123624	3.13457	-4.23647	-1.09515	0.0663208	0.00765605	9.29017	0.985526	9.936	0.0468	11.7219	3.3371	0.00610993	23.3675	0.495988	0.037986	0.077643	1.30885	0.105663	0.144965	0.279693	-0.012584	2.3979	0.3636	0	0.413367	1.82193	1	2.94444	0.518398	0.1089	0.0375125	0.0181713
60	2013	C	0	0	深圳市	0.00128783	0	5.25	5	79.13	4	72.55	5	76.6	6	84.2	0.132051	2.28981	-4.27421	-1.08799	0.0600827	0.00823818	9.26113	1.03207	10.237	0.0194	11.7297	3.42302	0.00917099	23.3939	0.561427	0.029525	0.062703	1.48076	0.0672007	0.12954	0.278473	0.14773	2.3979	0.3636	0	0.437469	1.45758	1	2.99573	0.528744	0.1229	0.0283135	0.018377
60	2014	C	0	0	深圳市	0.000992012	0	4.25	4	72.55	1	59.33	3	67.33	6	82.82	0.21145	2.28769	-4.31562	-1.09212	0.0809465	0.00688741	9.2322	1.03989	10.445	0.0314	11.915	3.44766	0.00591183	23.3776	0.540798	0.038464	0.087122	1.71628	0.060455	0.12972	0.317025	0.163673	2.3979	0.3636	0	0.431667	1.91697	1	3.04452	0.513864	0.0914	0.0229075	0.0227603
60	2015	C	0	0	深圳市	0.00125778	0	4.75	5	77.76	3	67.93	4	74.19	7	85.19	0.141073	2.01261	-4.34562	-1.08436	0.0311837	0.00704056	8.96801	1.10955	11.076	0.0448	11.9703	5.15504	0.0122448	23.4885	0.503239	0.017324	0.036166	1.12549	0.0210929	0.122111	0.311643	-0.310741	2.30259	0.4	0	0.410497	2.35813	1	3.09104	0.522767	0.0687	0.0302002	0.0309863
60	2016	C	0	1	深圳市	0.00195311	0	5	5	78.03	2	64.35	5	76.54	7	86.01	0.112772	1.55556	-4.37916	-1.08297	0.0347006	0.00652856	9.22227	1.2159	10.49	0.0818	12.0282	4.85968	0.0207014	23.5547	0.515829	0.020815	0.042458	0.916787	0.0828783	0.121456	0.29962	-0.110923	2.30259	0.4	0	0.412364	1.96924	1	3.13549	0.494214	0.0626	0.0350035	0.0120176
60	2017	C	0	1	深圳市	0.00180893	0	5	5	78.78	3	65.5	5	75.42	7	87.83	0.134099	-0.310231	-4.408	-1.09825	0.042814	0.00576909	9.17833	1.28451	10.61	0.0391	12.1202	4.69248	0.0156436	23.6608	0.448532	0.061028	0.117451	1.05846	0.130864	0.117798	0.287279	0.259476	2.19722	0.4444	1	0.375394	1.79676	1	3.17805	0.464696	0.0531	0.0391135	0.0304269
60	2018	C	0	1	深圳市	0.0014212	0	5	5	76.32	2	61.28	5	76.28	6	84.02	0.085407	0.166798	-4.44431	-1.09688	0.0618253	0.00714412	9.19573	1.32152	10.854	0.0519	12.1525	4.8295	0.0229123	23.694	0.450591	0.047405	0.086124	1.04043	0.101084	0.112044	0.306365	0.052557	2.19722	0.3333	1	0.3721	1.1752	1	3.21888	0.413438	0.0481	0.0236058	0.0347088
60	2019	C	1	1	深圳市	0.00127083	0	5	5	77.76	2	64.46	5	78.55	6	84.02	0.123388	0.101891	-4.47964	-1.11258	0.0571538	0.00673624	9.17066	1.38968	11.342	0.0787	12.2234	5.034	0.0203671	23.7349	0.440773	0.043759	0.078927	1.14498	0.109314	0.0838078	0.356061	0.142116	2.19722	0.3333	0	0.375504	1.19608	1	3.2581	0.430365	0.0301	0.0233967	0.0112252
60	2020	C	1	1	深圳市	0.00140423	0	5	5	78.64	3	67.59	5	77.82	6	84.84	0.144278	0.876492	-4.49724	-1.11457	0.0664374	0.00607274	9.1937	1.42588	11.673	0.0643	11.9786	5.71698	0.012166	23.9157	0.47259	0.049244	0.090876	1.35334	0.0658068	0.0839327	0.305715	0.325677	2.19722	0.3333	0	0.374707	1.17918	1	3.29584	0.430321	0.0301	0.0168027	0.0108373
60	2021	C	1	1	深圳市	0.00193188	0	4.25	4	72.33	2	60.92	5	77.87	6	82.56	0.135819	1.18243	-4.52005	-1.11018	0.067917	0.00894715	9.17616	1.36837	12.014	0.0511	12.0649	5.91092	0.0124654	24.0412	0.501386	0.047009	0.091795	1.71115	0.0640309	0.0871892	0.279931	0.470556	2.19722	0.3333	0	0.377042	1.15058	1	3.3322	0.413603	0.0016	0.0119863
60	2022	C	1	1	深圳市	0.00132506	0	4	4	73.74	3	65.97	5	78.22	6	80.18	0.059835	1.98463	-4.53491	-1.12546	0.0596939	0.00776979	9.1843	1.35959	12.364	0.0329	12.1187	6.1461	0.0141639	24.2092	0.531575	0.041003	0.085024	1.8368	0.0331002	0.106845	0.345355	0.245004	2.19722	0.3333	0	0.395967	1.00088	1	3.3673	0.43151	0.0016	0.00940097
60	2023	C	1	1	深圳市	0.00316324	0	4.75	5	75.84	4	72.28	5	78.92	5	78	0.119471	2.5041	-4.52837	-1.13744	0.0646942	0.00693524	9.3547	1.3905	12.725	0.0663	12.1819	6.30369	0.0131461	24.485	0.602202	0.027482	0.064174	1.73348	0.0365054	0.205827	0.40445	0.185346	2.19722	0.3333	0	0.400977	0.977487	1	3.4012	0.463022	0.0016	0.00978912	0.0108145
61	2009	F	0	0	深圳市	0.00322913	0	4	4	74.73	2	61.34	4	73.54	6	83.97	0.332424	0.962578	-3.95445	-1.05076	0.0235018	0.0144777	8.58858	0.930005	9.244	0	11.4379	3.48536	0.009652	22.6707	0.50535	0.023772	0.045512	0.189274	0.0736718	0.0117095	0.210153	-0.026595	2.56495	0.3846	0	0.355763	1.6363	1	2.77259	0.562912	1.6965	0.234548	0.0182938
61	2010	F	0	0	深圳市	0.00404795	0	4.75	5	75.35	1	55.86	6	82.36	6	83.13	0.202232	-0.085243	-3.98506	-1.03693	0.0543897	0.0248581	8.6935	0.90881	9.835	0.0341	11.5795	3.54004	0.0104203	22.9329	0.585435	0.034658	0.077123	0.170037	0.0727858	0.01041	0.179579	0.100217	2.56495	0.3846	0	0.360712	1.90441	1	2.83321	0.684304	1.3377	0.244332	0.0201101
61	2011	F	0	0	深圳市	0.00596986	0	4.75	4	74.6	1	58.76	6	83.74	5	78.67	0.14629	4.08196	-4.02319	-1.03804	0.0468907	0.055522	8.8578	0.931098	9.888	0.0154	11.6121	3.34599	0.0061263	22.9713	0.564772	0.028139	0.066196	0.193274	-0.028817	0.00988196	0.285148	0.309932	2.56495	0.3846	0	0.362792	1.465	1	2.89037	0.801909	1.3036	0.214453	0.0035537
61	2012	L	0	0	深圳市	0.00329129	0	4.75	5	78.04	2	64.14	6	83.74	6	83.13	0.115533	3.55534	-4.05687	-1.05476	0.00835721	0.0546019	8.58223	0.985526	9.936	0.0468	11.7219	3.3371	0.00610993	23.0857	0.593047	0.010443	0.02487	0.167329	0.0268077	0.00965014	0.27521	-0.063321	2.56495	0.3846	0	0.361834	1.33246	1	2.94444	0.497887	1.3036	0.234677	0.0048272
61	2013	L	0	0	深圳市	0.00211569	0	4.5	4	74.58	2	62.69	4	72.37	6	83.55	0.139533	2.14021	-4.08752	-1.05814	0.0218999	0.057308	8.38092	1.03207	10.237	0.0194	11.7297	3.42302	0.00917099	23.2266	0.499835	0.018903	0.041377	0.189898	0.0155606	0.000168734	0.228061	0.289336	2.56495	0.3846	0	0.460782	1.54158	1	2.99573	0.639	0.5777	0.179921	0.0078033
61	2014	L	0	0	深圳市	0.00359772	0	4.25	4	73.82	2	61.34	4	70.99	6	83.55	0.121664	2.18831	-4.11808	-1.06022	0.00827963	0.0604633	8.4929	1.03989	10.445	0.0314	11.915	3.44766	0.00591183	23.3483	0.554065	0.010404	0.02207	0.126649	0.0523291	0.000144582	0.223005	-0.239961	2.56495	0.3846	0	0.589607	2.10185	1	3.04452	0.705305	0.4253	0.246013	0.0327452
61	2015	L	0	0	深圳市	0.00322736	0	4.75	5	77.23	2	61.34	6	82.97	6	83.55	0.08472	1.68768	-4.14414	-1.06393	-0.00662525	0.0430698	8.58821	1.10955	11.076	0.0448	11.9703	5.15504	0.0122448	23.504	0.622803	0.002957	0.007233	0.116022	0.0720724	0.0316113	0.176078	0.053635	2.56495	0.3846	0	0.61953	2.4055	1	3.09104	0.692617	0.427	0.243664	0.0996931
61	2016	L	0	1	深圳市	0.00369099	0	5	5	78.23	2	64.14	6	83.74	6	83.55	0.073709	2.65715	-4.1775	-1.05635	0.00135037	0.0414377	8.56484	1.2159	10.49	0.0818	12.0282	4.85968	0.0207014	23.571	0.637762	0.005589	0.015126	0.121033	0.0306065	0.0241597	0.112332	0.163204	2.56495	0.3846	0	0.63953	1.85198	1	3.13549	0.705613	0.4175	0.198316	0.0808373
61	2017	L	0	1	深圳市	0.00248575	0	5	5	78.15	2	64.62	6	83	6	83.55	0.086406	2.78686	-4.20815	-1.06684	-0.00368049	0.0403694	8.52437	1.28451	10.61	0.0391	12.1202	4.69248	0.0156436	23.6594	0.659883	0.00339	0.009666	0.135556	0.0409571	0.0276323	0.0866622	0.210983	2.56495	0.3846	0	0.63953	1.34938	1	3.17805	0.691435	0.1212	0.158004	0.0941562
61	2018	L	0	1	深圳市	0.00503227	0	5	5	78.15	2	64.62	6	83	6	83.55	0.075184	2.54291	-4.24724	-1.09525	0.0127949	0.0444605	8.48136	1.32152	10.854	0.0519	12.1525	4.8295	0.0229123	23.6677	0.653134	0.005297	0.01542	0.121663	0.0656549	0.0318163	0.101337	-0.058957	2.56495	0.3846	0	0.651586	1.08624	1	3.21888	0.692343	0.0231	0.166559	0.0339343
61	2019	L	0	1	深圳市	0.0104823	0	5	5	77.75	2	64.62	6	81.62	6	83.55	0.145027	2.50704	-4.28377	-1.11446	0.0464668	0.0373292	8.44333	1.38968	11.342	0.0787	12.2234	5.034	0.0203671	23.6988	0.649514	0.021081	0.060454	0.147821	0.0473489	0.0294885	0.103337	0.239311	2.48491	0.4167	0	0.651586	1.13336	1	3.2581	0.693244	0.022	0.139492	0.0407482
61	2020	L	0	1	深圳市	0.0129265	0	5	5	77.88	2	62.31	6	82.34	6	84.82	0.126468	2.96837	-4.32489	-1.10096	0.0503887	0.0413289	8.48941	1.42588	11.673	0.0643	11.9786	5.71698	0.012166	23.6888	0.634451	0.022669	0.063324	0.162768	0.0360281	0.0363681	0.102176	0.112685	2.48491	0.4167	0	0.651586	1.25091	1	3.29584	0.698244	0.0022	0.12987	0.0026783
61	2021	L	0	1	深圳市	0.0134437	0	4.25	4	73.93	3	66.38	4	73.11	5	78.25	0.138461	2.53541	-4.35764	-1.09712	0.0530724	0.042523	8.47783	1.36837	12.014	0.0511	12.0649	5.91092	0.0124654	23.7519	0.638294	0.024733	0.068028	0.204226	0.0601172	0.0438894	0.0972841	0.2891	2.48491	0.4167	0	0.651586	1.1629	1	3.3322	0.684757	0.0022	0.11274
61	2022	L	0	1	深圳市	0.0164613	0	4	4	73.33	3	66.03	4	71.73	5	78.09	0.056511	3.4126	-4.39584	-1.10249	0.0357508	0.0347421	8.47178	1.35959	12.364	0.0329	12.1187	6.1461	0.0141639	23.7672	0.641841	0.015716	0.043665	0.209018	0.0407979	0.0404677	0.102703	0.063878	2.30259	0.5	0	0.651586	1.10272	1	3.3673	0.686492	0.0022	0.100975
61	2023	L	0	1	深圳市	0.0161841	0	4.75	4	74.97	3	69.91	4	71.14	6	80.27	0.127646	3.05333	-4.43417	-1.12244	0.0818028	0.0307696	8.48735	1.3905	12.725	0.0663	12.1819	6.30369	0.0131461	23.7812	0.62812	0.028316	0.077703	0.259742	0.0473051	0.0424278	0.101864	0.261062	2.48491	0.4167	0	0.675049	1.14397	1	3.4012	0.774992	0.0012	0.0913048	0.100976
62	2009	L	0	0	深圳市	0.000233003	0	4	4	71.67	1	53.26	5	75.58	5	78.26	0.597025	1.15245	-3.73975	-0.935179	0.111353	0.039199	9.54567	0.930005	9.244	0	11.4379	3.48536	0.009652	21.7345	0.383852	0.06356	0.12761	0.687645	0.121691	0.0332348	0.085646	0.224117	2.19722	0.3333	0	0.763241	1.46314	0	2.77259	0.757406	0.0169	0.0474518	0.0148096
62	2010	L	0	0	深圳市	0.00217987	0	4.75	5	77.45	1	51.37	9	100	6	81.19	0.495892	2.97065	-3.79355	-0.934221	0.0870787	0.0103232	6.93342	0.90881	9.835	0.0341	11.5795	3.54004	0.0104203	22.0651	0.531336	0.053835	0.101512	0.135899	-0.199337	0.221749	0.0844052	-0.796628	2.19722	0.3333	0	0.7671	1.2531	0	2.83321	0.772275	0.0086	0.148732	0.0212965
62	2011	L	0	0	深圳市	0.0581838	0	4.25	4	70.77	1	49.57	5	75.58	5	78.26	0.3661	5.08214	-3.83732	-0.960731	0.0288056	0.0168201	7.3518	0.931098	9.888	0.0154	11.6121	3.34599	0.0061263	22.2631	0.620521	0.011673	0.027815	0.160974	-0.0629313	0.364331	0.066389	0.529437	2.19722	0.3333	0	0.768613	1.11262	0	2.89037	0.772704	0.0086	0.167753	0.0392961
62	2012	L	0	0	深圳市	0.0545225	0	4	4	73.76	1	49.57	9	100	5	75.48	0.187119	3.46656	-3.87784	-1.06411	0.129031	0.0232687	7.49053	0.985526	9.936	0.0468	11.7219	3.3371	0.00610993	22.3323	0.679874	0.05856	0.167901	0.322709	0.0263835	0.334322	0.051617	1.2814	2.19722	0.3333	0	0.75821	1.48454	0	2.94444	0.7556	0.0015	0.0978613	0.0435895
62	2013	L	0	0	深圳市	0.0778375	0	4.75	5	76.85	1	55.43	9	100	5	78.41	0.211589	-0.457139	-3.9177	-1.03577	0.114593	0.00550526	7.46394	1.03207	10.237	0.0194	11.7297	3.42302	0.00917099	22.3071	0.588971	0.082264	0.225378	0.420574	0.214686	0.410743	0.0504712	0.331547	2.19722	0.3333	0	0.759067	2.21066	0	2.99573	0.750851		0.0716355	0.053268
62	2014	L	0	0	深圳市	0	0	4.25	4	71.81	1	49.57	7	85.35	5	76.87	0.629652	1.70598	-3.95496	-1.024	0.225674	0.00893138	7.44542	1.03989	10.445	0.0314	11.915	3.44766	0.00591183	22.121	0.411927	0.105712	0.215149	0.598297	0.0613146	0.12947	0.0978815	0.285407	2.19722	0.3333	1	0.774788	2.91249	0	3.04452	0.75653		0.05303	0.022658
62	2015	L	0	0	深圳市	0.0456115	0	4	4	72.66	1	51.46	7	85.35	5	77.56	0.335812	0.08191	-3.99686	-1.00716	0.089294	0.00581818	7.44366	1.10955	11.076	0.0448	11.9703	5.15504	0.0122448	22.545	0.404929	0.073072	0.12337	0.397644	0.026143	0.122016	0.061361	-0.237846	2.19722	0.3333	1	0.777169	4.39817	0	3.09104	0.731968	2.8641	0.0746479	0.0424337
62	2016	L	0	1	深圳市	0.0422609	0	4	4	73.48	1	49.57	7	85.35	5	79.8	0.31664	1.96266	-4.03476	-1.0653	0.0780499	0.00761142	7.40245	1.2159	10.49	0.0818	12.0282	4.85968	0.0207014	22.6581	0.410328	0.06712	0.113336	0.84618	-0.0533516	0.169831	0.0474809	1.72643	2.19722	0.3333	1	0.777169	3.19188	0	3.13549	0.731097	2.8641	0.0347736	0.023249
62	2017	F	0	1	深圳市	0.0409079	0	4	4	72.28	1	46.26	7	85.35	5	79.11	0.262987	1.03311	-4.06781	-1.05301	0.0478291	0.00556751	7.51316	1.28451	10.61	0.0391	12.1202	4.69248	0.0156436	22.871	0.477586	0.058976	0.106748	1.07151	0.0502732	0.153231	0.036111	0.49657	2.19722	0.3333	1	0.777169	2.346	0	3.17805	0.733133	2.8641	0.0313776	0.0253073
62	2018	F	0	1	深圳市	0.0501995	0	4.75	5	76.53	1	54.11	9	100	5	78.41	0.25233	2.39116	-4.09864	-1.07845	0.12933	0.00325324	7.55224	1.32152	10.854	0.0519	12.1525	4.8295	0.0229123	23.0556	0.500546	0.080865	0.158211	1.23989	-0.00252456	0.174709	0.0282103	0.422016	2.07944	0.375	1	0.777169	1.66624	0	3.21888	0.741283	0.1612	0.0235779	0.0054785
62	2019	F	0	1	深圳市	0.0389496	0	4.25	4	74.24	1	52.21	8	90.23	5	78.41	0.271517	1.43636	-4.13265	-1.08536	0.108789	0.00323892	7.54274	1.38968	11.342	0.0787	12.2234	5.034	0.0203671	23.1525	0.496825	0.066251	0.132132	1.32598	0.0611925	0.150066	0.0229845	0.216579	2.19722	0.3333	1	0.777169	1.80801	0	3.2581	0.738396	0.1618	0.0162185	0.0078502
62	2020	F	0	1	深圳市	0.0954427	0	4	4	74.19	1	54.11	7	85.35	5	79.11	0.312547	2.68439	-4.16742	-1.07774	0.0913264	0.0022109	7.53956	1.42588	11.673	0.0643	11.9786	5.71698	0.012166	23.2281	0.50159	0.061017	0.121862	1.38448	-0.0392631	0.124492	0.0209519	0.137629	2.19722	0.3333	1	0.776516	1.56377	0	3.29584	0.731764	0.1729	0.0127427	0.0101736
62	2021	F	0	1	深圳市	0.0997163	0	4	4	74.05	2	64.19	4	70.41	6	81.8	0.30184	2.79148	-4.18632	-1.08165	0.120126	0.00304074	7.71691	1.36837	12.014	0.0511	12.0649	5.91092	0.0124654	23.4812	0.568913	0.074457	0.161683	1.63101	-0.0590853	0.189736	0.0151417	0.398604	2.19722	0.3333	1	0.752081	1.71096	0	3.3322	0.77583	0.1729	0.0135993
62	2022	F	0	1	深圳市	0.124681	0	4	4	73.46	2	64.19	4	71.66	5	79.59	0.247049	0.361327	-4.22276	-1.10878	0.108526	0.00332534	7.82804	1.35959	12.364	0.0329	12.1187	6.1461	0.0141639	23.5183	0.52189	0.067208	0.147699	1.49026	0.13908	0.174724	0.0135498	0.048191	2.19722	0.3333	0	0.745278	1.30193	0	3.3673	0.756171	0.1736	0.0173757
62	2023	F	0	1	深圳市	0.134655	0	4	4	73.63	2	64.19	3	69.25	6	81.7	0.253906	2.64629	-4.25457	-1.09286	0.0448369	0.0104202	7.73674	1.3905	12.725	0.0663	12.1819	6.30369	0.0131461	23.5994	0.548013	0.032448	0.069852	1.20752	-0.00420293	0.150065	0.0118481	-0.139824	2.19722	0.3333	0	0.744993	1.21198	0	3.4012	0.743868	0.1736	0.0166927	0.0042032
63	2009	C	0	0	深圳市	0.120434	0	5	5	78.23	4	70.67	4	71.01	7	86.96	0.055677	3.39614	-3.3556	-1.11047	0.17673	0.0155077	11.1612	0.930005	9.244	0	11.4379	3.48536	0.009652	24.9478	0.737368	0.045226	0.16272	1.01121	0.0545675	0.136443	0.0689841	0.360756	2.63906	0.3571	0	0.544179	1.75293	0	2.56495	0.801219	0.3245	0.138529	0.0110318
63	2010	C	0	0	深圳市	0.090553	0	5	5	77.27	3	69.09	3	69.09	7	86.96	0.10025	2.37551	-3.34788	-1.06193	0.161808	0.0165151	11.3531	0.90881	9.835	0.0341	11.5795	3.54004	0.0104203	25.1559	0.703371	0.045595	0.162033	0.921526	0.0111929	0.14383	0.0775202	0.165769	2.63906	0.3571	0	0.543045	1.50267	0	2.63906	0.754612	0.2804	0.135237	0.209269
63	2011	C	0	0	深圳市	0.082936	0	5	5	76.13	3	68.71	3	69.87	6	84.14	0.018066	4.52914	-3.33213	-1.1598	0.0632225	0.0201076	11.4052	0.931098	9.888	0.0154	11.6121	3.34599	0.0061263	25.3807	0.750505	0.023671	0.087534	0.910239	-0.0171989	0.142248	0.06647	0.227579	2.63906	0.3571	0	0.5406	1.24541	0	2.70805	0.715663	0.3096	0.0281922	0.212294
63	2012	C	0	0	深圳市	0.115951	0	5	5	78.1	4	70.5	4	73.68	6	84.96	0.007721	4.48549	-3.36708	-1.1143	#N/A	0.018794	11.2696	0.985526	9.936	0.0468	11.7219	3.3371	0.00610993	25.4003	0.789302	-0.024478	-0.106469	0.791482	0.014426	0.106494	0.0660481	-0.023594	2.63906	0.3571	0	0.547937	1.08256	0	2.77259	0.694605	0.3291	0.131925	0.21717
63	2013	C	0	0	深圳市	0.111269	0	4.25	4	73.34	3	67.13	2	62.57	6	83.76	0.017267	3.0707	-3.42528	-1.16062	0.0596779	0.0172779	11.1432	1.03207	10.237	0.0194	11.7297	3.42302	0.00917099	25.3292	0.763931	0.013816	0.062037	0.725054	0.0257253	0.124245	0.0744356	-0.106693	2.63906	0.3571	0	0.527753	1.17343	0	2.83321	0.645144	0.2514	0.127418	0.0306517
63	2014	C	1	0	深圳市	0.134791	0	4.5	4	74.3	4	70.5	2	62.57	6	84.14	0.027361	2.39203	-3.45007	-1.17439	0.0841253	0.0203332	11.2333	1.03989	10.445	0.0314	11.915	3.44766	0.00591183	25.3887	0.752458	0.026445	0.109288	0.789857	0.0236563	0.18446	0.0691837	0.082909	2.63906	0.3571	0	0.513233	1.27458	0	2.89037	0.571648	0.2289	0.135508	0.0346117
63	2015	C	1	0	深圳市	0.0649162	0	4.75	5	76.66	4	70.5	4	71.98	6	82.97	0.019131	0.474559	-3.45591	-1.19557	0.0664902	0.0245691	11.3459	1.10955	11.076	0.0448	11.9703	5.15504	0.0122448	25.5182	0.641433	0.032938	0.107416	0.882279	0.0612493	0.163215	0.0636275	0.229714	2.56495	0.3846	0	0.536384	1.22932	0	2.94444	0.597282	0.243	0.145568	0.0489601
63	2016	C	1	1	深圳市	0.0688995	0	5.25	6	80.35	4	72.08	5	79.76	6	84.96	0.006991	1.84504	-3.45216	-1.11494	#N/A	0.113219	11.308	1.2159	10.49	0.0818	12.0282	4.85968	0.0207014	25.6766	0.711347	-0.010567	-0.033428	0.759802	0.0371376	0.189285	0.0530655	0.010448	2.63906	0.3571	0	0.531697	1.1494	0	2.99573	0.616712	0.1436	0.150642	0.0666162
63	2017	C	1	1	深圳市	0.0900225	0	5.75	5	79.63	6	83.01	5	77.17	5	79.57	0.008058	2.32046	-3.48755	-1.11258	0.13468	0.0252145	11.2222	1.28451	10.61	0.0391	12.1202	4.69248	0.0156436	25.6928	0.684777	0.037719	0.124879	0.762003	0.0501519	0.182229	0.060394	0.074897	2.63906	0.3571	0	0.516644	1.60913	0	3.04452	0.605164	0.0952	0.147217	0.0654005
63	2018	C	1	1	深圳市	0.0495688	0	5.5	5	79.9	7	87.25	4	74.82	5	79.58	0.003893	4.32248	-3.5575	-1.09353	#N/A	0.0154995	11.1308	1.32152	10.854	0.0519	12.1525	4.8295	0.0229123	25.5858	0.745184	-0.050853	-0.177413	0.625753	-0.0712434	0.193361	0.0687902	-0.214144	2.19722	0.3333	0	0.511538	1.31133	0	3.09104	0.611434	0.0137	0.042701	0.0207882
63	2019	C	1	1	深圳市	0.0649655	0	6	6	80.65	7	87.46	5	78.55	5	78.59	0.016818	2.24423	-3.57304	-1.18938	0.149324	0.00724685	11.1572	1.38968	11.342	0.0787	12.2234	5.034	0.0203671	25.6735	0.731206	0.042703	0.162918	0.670749	0.0527368	0.196091	0.0664543	0.061083	2.19722	0.3333	0	0.48878	1.64936	0	3.13549	0.603085	0.0156	0.0526009	0.0167613
63	2020	C	1	1	深圳市	0.0646268	0	6	6	83.3	7	87.46	6	83.25	6	81.22	0.020841	1.99419	-3.59457	-1.18897	0.0897617	0.00897767	11.2079	1.42588	11.673	0.0643	11.9786	5.71698	0.012166	25.7381	0.693813	0.032358	0.112319	0.695256	0.0679301	0.223649	0.0790915	0.118079	2.19722	0.3333	0	0.422015	1.54584	0	3.17805	0.566561	0.0163	0.0492357	0.0178431
63	2021	C	1	1	深圳市	0.0801172	0	6	6	84.89	6	80.34	7	86.02	7	85.87	0.029603	1.02721	-3.60125	-1.1803	0.117821	0.00921272	11.1925	1.36837	12.014	0.0511	12.0649	5.91092	0.0124654	25.8518	0.684246	0.044057	0.141553	0.717109	0.093169	0.215193	0.0677695	0.128841	2.19722	0.3333	0	0.422503	1.51246	0	3.21888	0.553427	0.0133	0.0475422
63	2022	C	1	1	深圳市	0.0948113	0	6.75	7	85.18	5	77.71	7	86.29	7	87.53	0.006352	1.98216	-3.62025	-1.19515	0.109927	0.00744352	11.2227	1.35959	12.364	0.0329	12.1187	6.1461	0.0141639	25.9215	0.670944	0.04456	0.138111	0.703165	0.0418764	0.249981	0.0713624	0.073635	2.19722	0.3333	0	0.424055	1.29225	0	3.2581	0.535039	0.0205	0.0433717
63	2023	C	1	1	深圳市	0.0746101	0	6.75	7	85.88	5	79.02	7	88.2	7	86.72	0.021514	0.303686	-3.62789	-1.20448	0.156386	0.00570467	11.1857	1.3905	12.725	0.0663	12.1819	6.30369	0.0131461	26.0264	0.659974	0.048393	0.14453	0.650678	0.0866136	0.204676	0.0665431	0.010544	2.19722	0.3333	0	0.402362	1.24436	0	3.29584	0.513744	0.0184	0.0453258	0.0045325
65	2009	E	0	0	北京市	1	0	3	3	67.81	1	47.16	3	66.84	5	78.67	0.285673	0.443122	-4.12957	-0.953924	0.0668239	0.0176819	5.43372	3.67187	8.658	0.1022	11.1627	6.34372	0.0103931	21.5728	0.77056	0.020502	0.094599	0.82445	0.418577	0.20208	0.00597371	0.695971	2.19722	0.3333	0	0.676019	2.72731	1	3.2581	0.6267	0	0.0241988	0.0188101
65	2010	E	0	0	北京市	1	0	2.25	3	65.9	1	47.16	1	57.19	6	81.06	0.554898	1.32189	-4.1556	-0.975846	0.074956	0.00190044	5.4161	3.59039	8.907	0.1076	11.2377	6.3922	0.0126768	21.3927	0.706491	0.02317	0.089599	0.852423	0.116221	0.159679	0.00634301	-0.023977	1.79176	0.5	0	0.645195	2.30079	1	3.29584	0.6247	0	0.0205837	0.0177985
65	2011	E	0	0	北京市	1	0	2.25	2	62.67	1	48.56	2	60.1	4	71.38	0.196251	2.82523	-4.20932	-0.997483	0.132949	0.00811857	5.51745	3.7861	8.868	0.1104	11.3103	6.25619	0.0112648	21.5692	0.723701	0.039827	0.140164	1.22913	0.0489076	0.124863	0.00574947	0.43911	2.19722	0.3333	0	0.647261	1.593	1	3.3322	0.637461	0	0.0164419	0.0126483
65	2012	E	0	0	北京市	1	0	3.25	4	70.18	1	56.48	5	78.39	4	71.38	0.177686	3.5425	-4.26712	-1.00128	0.207231	0.00727471	5.56068	3.89531	8.895	0.1063	11.3791	6.28623	0.0111829	21.8832	0.756321	0.051874	0.201491	0.60161	-0.00193261	0.144569	0.00750289	-0.369251	2.19722	0.3333	0	0.648579	1.24573	1	3.3673	0.630611	0	0.0299557	0.0053371
65	2013	E	0	0	北京市	1	0	4.25	4	74.68	2	64.48	5	77.64	5	77.71	0.12578	-1.28787	-4.31459	-1.06353	0.228127	0.0216682	5.66643	4.03198	9.282	0.1207	11.4426	6.25535	0.0120342	22.1052	0.757927	0.054648	0.225084	0.824935	0.190324	0.1428	0.0352911	0.781699	2.19722	0.3333	0	0.660247	1.46898	1	3.4012	0.660581	0	0.0192687	0.0079042
65	2014	E	0	0	北京市	0.00194339	0	4.5	5	75.65	2	63.32	4	72.02	6	84.2	0.198415	0.453905	-4.35775	-1.03778	0.208832	0.023811	5.65948	4.13578	9.212	0.1277	11.5129	6.23469	0.0132537	22.3162	0.75983	0.050407	0.209138	0.679535	0.0345603	0.0731531	0.028067	0.022258	2.19722	0.3333	0	0.641123	1.69399	1	3.43399	0.68731	0	0.0197469	0.437574
65	2016	E	0	1	北京市	0.00419354	0	4.75	5	76.6	2	61.68	4	72.74	7	86.59	0.135022	1.2579	-4.40797	-1.11163	0.151678	0.0264957	7.61579	4.76782	9.171	0.1254	11.6801	7.37893	0.0111332	23.2204	0.698646	0.050319	0.156581	0.834508	0.0118587	0.0693755	0.0314801	1.04452	2.19722	0.3333	0	0.680733	1.65818	1	3.49651	0.808745	0	0.020842	0.430124
65	2017	E	0	1	北京市	0	0	5.25	5	77.52	2	63.25	5	79.33	6	83.34	0.218063	0.038254	-4.45198	-1.08285	0.132205	0.0175411	7.6014	4.89399	9.236	0.1371	11.7675	7.18669	0.0129116	23.1625	0.640241	0.046006	0.139535	0.824133	0.115388	0.0515995	0.0396558	0.11049	2.19722	0.3333	0	0.66708	1.3618	1	3.52636	0.734385	0	0.0179729	0.451836
65	2018	E	0	1	北京市	0.001665	0	5	5	76.43	3	68.8	5	75.71	6	80.69	0.199059	0.470741	-4.49208	-1.07018	0.137258	0.0137378	7.5606	5.02215	9.239	0.1438	11.8509	7.50581	0.0140459	23.1611	0.597413	0.053927	0.141482	0.871261	0.0159314	0.0375566	0.0367389	0.025835	2.19722	0.3333	0	0.676302	1.09289	1	3.55535	0.687556	0	0.0188549	0.0087947
65	2019	E	0	1	北京市	0.00295062	0	5	5	78.57	3	69.4	6	83.73	5	79.61	0.258856	3.72226	-4.51243	-1.06805	0.139757	0.0117994	7.44425	5.23404	9.512	0.1348	12.009	6.72657	0.0122534	23.4142	0.630137	0.056468	0.146989	0.844479	-0.107046	0.0378931	0.0381106	0.108077	2.07944	0.375	0	0.666693	1.06663	1	3.58352	0.69319	0	0.0184054	0.0090058
65	2020	E	0	1	北京市	0.00381755	0	5	5	77.54	3	69.4	6	80.82	5	79.34	0.2071	3.37694	-4.5326	-1.0805	0.128526	0.0113855	7.55852	5.24401	9.813	0.1321	12.013	7.26091	0.0113831	23.6181	0.655597	0.047774	0.134256	0.78292	-0.0704415	0.0368612	0.0437825	0.161886	2.19722	0.3333	0	0.659357	0.976456	1	3.61092	0.668808	0	0.0175248	0.0084999
65	2021	E	0	1	北京市	0.00372615	0	4.25	4	74.59	2	62.91	6	82.61	5	78.56	0.236576	1.64124	-4.56525	-1.08544	0.101209	0.0129796	7.55538	4.53988	10.123	0.1365	12.1226	6.90792	0.0111608	23.6856	0.6463	0.036182	0.103611	0.697392	0.0774115	0.0512478	0.0983771	0.015513	2.19722	0.3333	0	0.655128	0.991091	1	3.63759	0.664956	0	0.0207028
65	2022	E	0	1	北京市	0.00725035	0	4	4	72.54	2	64.01	6	81.69	4	73.11	0.108431	2.19996	-4.5897	-1.10127	0.0946142	0.0175856	7.56112	5.24349	10.444	0.14	12.1564	7.40053	0.0117446	23.818	0.612401	0.038786	0.104329	0.64857	0.0334248	0.0424608	0.125692	0.029369	2.19722	0.3333	0	0.658476	0.987956	1	3.66356	0.68207	0	0.0218378
65	2023	E	0	1	北京市	0.00808158	0	5	5	79.95	5	75.06	7	89.45	5	77.26	0.209142	2.70905	-4.62044	-1.12576	0.114336	0.0251224	7.5725	5.68984	10.774	0.1442	12.2075	7.97605	0.0119263	23.8913	0.608795	0.04161	0.10684	0.937527	0.0295485	0.0573636	0.122448	0.599603	2.19722	0.3333	0	0.688163	1.07408	1	3.68888	0.717752	0	0.0160509	0.0007956
66	2009	C	0	0	深圳市	0.00515629	0	4.5	5	77.57	4	74.38	4	72.46	6	82.64	0.155644	-2.42477	-3.52087	-1.28487	0.0787064	0.0149679	8.39412	0.930005	9.244	0	11.4379	3.48536	0.009652	24.0355	0.700102	0.042262	0.136493	1.48029	0.0285643	0.220574	0.122796	4.73982	2.19722	0.3333	0	0.524928	1.02285	1	2.56495	0.545577	0.027	0.0251011	0.0156364
66	2010	C	0	0	深圳市	0.00468686	0	5	5	78.73	4	72.8	5	78.66	6	81.82	0.142711	3.089	-3.53361	-1.16691	0.0764136	0.0304956	8.50532	0.90881	9.835	0.0341	11.5795	3.54004	0.0104203	24.2175	0.674447	0.027651	0.087357	2.76442	-0.0429204	0.27243	0.103963	2.68032	2.19722	0.3333	0	0.580639	1.02979	1	2.63906	0.589375	0.0072	0.0226071	0.225109
66	2011	C	0	0	深圳市	0.0073208	0	5.75	6	81.79	5	78.57	6	83.36	6	82.38	0.086412	4.50032	-3.5742	-1.10255	0.0454019	0.0371271	10.4221	0.931098	9.888	0.0154	11.6121	3.34599	0.0061263	24.2137	0.68834	0.014337	0.044968	2.31088	0.0194225	0.209623	0.0987547	-0.083606	2.19722	0.3333	0	0.579305	0.951821	1	2.70805	0.585655	0.0072	0.031856	0.229698
66	2012	C	0	0	深圳市	0.0402807	0	6	6	82.69	5	76.99	6	83.36	7	85.14	0.057509	3.13371	-3.58488	-1.08118	0.00940506	0.0449997	10.6542	0.985526	9.936	0.0468	11.7219	3.3371	0.00610993	24.3915	0.738523	0.002652	0.009327	2.21582	0.116448	0.243517	0.101545	0.042942	2.19722	0.3333	0	0.546583	0.935517	1	2.77259	0.555678	0.0024	0.0417539	0.22926
66	2013	C	0	0	深圳市	0.115618	0	6	6	82.18	5	78.57	7	85	6	82.12	0.046649	3.7265	-3.6247	-1.06014	#N/A	0.0515953	10.6105	1.03207	10.237	0.0194	11.7297	3.42302	0.00917099	24.3926	0.77851	-0.019459	-0.080583	1.98596	0.0164455	0.215413	0.0942956	-0.023736	2.19722	0.3333	0	0.575626	0.906399	1	2.83321	0.582211	0.0024	0.0410598	0.0094531
66	2014	C	1	0	深圳市	0.169071	0	5.25	5	77.49	5	76.78	5	77.95	5	77.55	0.074634	2.83386	-3.65891	-1.07127	#N/A	0.0477301	10.5843	1.03989	10.445	0.0314	11.915	3.44766	0.00591183	24.4258	0.791154	-0.008519	-0.03961	1.93552	0.0642049	0.227584	0.0881988	-0.00839	2.19722	0.3333	0	0.566769	0.978179	1	2.89037	0.57299	0.0024	0.0420353	0.0412835
66	2016	C	1	1	深圳市	0.0667122	0	5	5	76.72	4	72.48	4	74.82	6	80.18	0.054622	3.21586	-3.73758	-1.05945	0.0231035	0.000945888	10.4992	1.2159	10.49	0.0818	12.0282	4.85968	0.0207014	24.4334	0.767378	0.005345	0.023575	1.72138	0.0507719	0.00927234	0.0137794	-0.052206	2.19722	0.3333	0	0.56203	1.17034	1	2.99573	0.574035	0.0024	0.0423374	0.0247073
66	2017	C	1	1	深圳市	0.0979859	0	5.75	6	81.77	5	77.85	5	77.31	7	86.78	0.165513	3.27788	-3.9097	-1.03397	0.0737928	0.00489863	9.53452	1.28451	10.61	0.0391	12.1202	4.69248	0.0156436	23.4447	0.502777	0.020749	0.05932	0.283383	-0.0264881	0.107219	0.122338	-0.862475	2.19722	0.3333	0	0.433563	1.77388	1	3.04452	0.448336	0.0011	0.116359	0.0227093
66	2018	C	1	1	深圳市	0.126907	0	6.25	6	84.83	6	81.87	6	84.17	7	86.78	0.127841	2.13919	-3.94491	-1.07771	0.158435	0.00399846	9.53575	1.32152	10.854	0.0519	12.1525	4.8295	0.0229123	23.496	0.584406	0.067707	0.14869	0.641555	0.00280336	0.123994	0.119958	0.052872	2.19722	0.3333	0	0.436701	1.38523	1	3.09104	0.480599	0.0152	0.0605736	0.0277662
66	2019	C	1	1	深圳市	0.136329	0	6.75	7	85.5	6	82.09	8	90.37	6	83.96	0.133324	2.59468	-3.95199	-1.10228	0.11772	0.00419163	9.51569	1.38968	11.342	0.0787	12.2234	5.034	0.0203671	23.7992	0.600809	0.060487	0.145105	0.562591	0.00503693	0.168063	0.128356	0.083351	2.19722	0.3333	0	0.463017	2.44883	1	3.13549	0.551498	0.0132	0.0541713	0.0085967
66	2020	C	1	1	深圳市	0.0856698	0	7	7	85.48	7	85.46	7	88.02	6	83.79	0.160099	3.2756	-3.96043	-1.11512	0.0836272	0.00402771	9.64277	1.42588	11.673	0.0643	11.9786	5.71698	0.012166	24.0386	0.660481	0.039617	0.108301	0.587228	0.00607496	0.203594	0.105328	0.3322	2.19722	0.3333	0	0.452918	2.6801	1	3.17805	0.521704	0.0054	0.0503933	0.004323
66	2021	C	1	1	深圳市	0.0930851	0	5.5	5	77.14	4	73.97	6	81.6	4	74.99	0.141929	3.47048	-3.97463	-1.10278	0.0532032	0.00586868	9.73139	1.36837	12.014	0.0511	12.0649	5.91092	0.0124654	24.211	0.670954	0.022659	0.067874	0.590642	-0.00883101	0.220015	0.121355	0.231505	2.19722	0.3333	0	0.45311	1.94279	1	3.21888	0.472678	0.0095	0.0605764
66	2022	C	1	1	深圳市	0.103283	0	5	5	76.66	4	73.72	6	82.71	4	72.94	0.052116	3.42785	-4.00911	-1.10723	0.0139093	0.00863109	9.67439	1.35959	12.364	0.0329	12.1187	6.1461	0.0141639	24.2458	0.561631	0.006797	0.01767	0.421354	-0.0118577	0.205234	0.125769	-0.211524	2.19722	0.3333	0	0.456267	1.51999	1	3.2581	0.509051	0.0086	0.0672022
66	2023	C	1	1	深圳市	0.130991	0	4.75	5	75.61	4	73.97	5	77.69	4	74.68	0.165621	3.54809	-4.04788	-1.05516	#N/A	0.00578699	9.59288	1.3905	12.725	0.0663	12.1819	6.30369	0.0131461	24.2535	0.593417	-0.025651	-0.060723	0.394678	0.0128069	0.179892	0.139942	-0.04328	2.19722	0.3333	0	0.444513	1.53639	1	3.29584	0.495404	0.0086	0.0658561	1.55652
68	2009	C	0	0	深圳市	0	0	3.25	4	70.29	1	52.96	2	62.27	6	84.55	0.112939	8.5742	-3.46309	-0.90329	#N/A	0.0114818	5.35659	0.930005	9.244	0	11.4379	3.48536	0.009652	20.3687	0.748636	-0.998602	-1.85441	0.277336	0.471127	0.0213035	0.783669	-0.766926	2.19722	0.3333	0	0.604933	6.29049	1	2.56495	0.605638	0.0007	0.767098	0.20282
68	2013	C	0	0	深圳市	0	0	1.75	1	57.55	1	47.59	1	53.04	3	65.68	0.01936	11.1475	-3.5923	-1.05178	#N/A	0.00510648	3.58352	1.03207	10.237	0.0194	11.7297	3.42302	0.00917099	20.1983	0.669023	-0.073098	-0.173509	1.41819	-0.336017	2.63425e-05	0.362775	5.87687	2.19722	0.3333	0	0.605078	9.0204	1	2.83321	0.6073	0	0.0466608	0.116504
68	2014	C	1	0	深圳市	0	0	1.75	2	61.11	1	47.59	2	64.8	3	65.53	0.00025	6.66226	-3.56321	-0.858134	#N/A	0.0920526	5.54518	1.03989	10.445	0.0314	11.915	3.44766	0.00591183	19.8575	0.723252	-0.208206	-0.675033	0.132752	0.262955	0.00558501	0.487744	-0.906901	2.48491	0.3333	0	0.481755	19.35	1	2.89037	0.492334	0	0.728651	0.0198988
68	2016	C	1	1	深圳市	0.00171117	0	3.25	4	70.38	1	57.49	3	66.15	5	79.82	0.452975	0.185595	-3.83498	-0.935375	0.0110118	0.0309891	6.03548	1.2159	10.49	0.0818	12.0282	4.85968	0.0207014	20.9961	0.390353	0.008422	0.011923	0.287278	0.0366202	0.00739724	0.143959	0.744023	2.48491	0.3333	0	0.532211	6.13572	1	2.99573	0.530232	0.0001	0.292686	0.0308026
68	2017	C	1	1	深圳市	0.000410513	0	3.5	4	70.49	1	57.09	2	64.8	6	81.18	0.37502	1.16547	-3.94083	-0.94605	0.0307974	0.0141678	6.31897	1.28451	10.61	0.0391	12.1202	4.69248	0.0156436	21.7542	0.610299	0.015857	0.03448	0.200577	0.00637247	0.00465671	0.0637098	0.387704	2.3979	0.3636	0	0.519597	2.26796	1	3.04452	0.522115	0.0001	0.187988	0.0493176
68	2018	C	1	1	深圳市	0.000611146	0	3.75	4	72.19	1	58.88	4	73.4	5	78.17	0.287753	4.22754	-3.99017	-0.924654	#N/A	0.0199159	6.29342	1.32152	10.854	0.0519	12.1525	4.8295	0.0229123	21.9598	0.728095	-0.044719	-0.137695	0.065915	-0.0144043	0.00615835	0.0484958	-0.501372	2.3979	0.3636	0	0.50526	1.97047	1	3.09104	0.498261	0.0001	0.403635	0.0488889
68	2019	C	1	1	深圳市	0.00244669	0	3.25	3	68.68	1	55.51	3	66.35	5	76.97	0.55073	3.90056	-4.03326	-0.95952	0.00758691	0.00818224	6.31716	1.38968	11.342	0.0787	12.2234	5.034	0.0203671	22.0547	0.747129	0.001994	0.007613	0.062265	0.00667339	0.00784171	0.0485142	0.093188	2.19722	0.4444	1	0.483419	1.85582	1	3.13549	0.470359		0.331153	0.0315639
68	2020	M	0	1	深圳市	0.00682668	0	3.25	3	68.78	1	56.45	1	57.24	6	84.18	0.596936	4.47068	-4.07269	-0.921244	#N/A	0.00672039	6.17794	1.42588	11.673	0.0643	11.9786	5.71698	0.012166	22.0353	0.790441	-0.047752	-0.20634	0.06098	-0.00422684	0.00830447	0.0529873	0.015965	2.48491	0.3333	0	0.464546	1.67139	1	3.17805	0.4525		0.331439	0.123056
68	2021	M	0	1	深圳市	0.00459478	0	3.75	4	70.76	1	56.14	4	70.22	5	75.62	0.544975	4.86613	-4.11485	-1.03307	#N/A	0.00520595	6.51026	1.36837	12.014	0.0511	12.0649	5.91092	0.0124654	22.1165	0.836634	-0.030564	-0.16474	0.241772	-0.00506104	0.0193733	0.0493045	3.09237	2.48491	0.3333	0	0.464998	1.70142	1	3.21888	0.456796	0	0.0819684
68	2022	M	0	1	深圳市	0.00618903	0	3	3	67.32	1	56.14	4	71.85	3	67.11	0.036059	5.8132	-4.15622	-0.9601	#N/A	0.0404368	6.38182	1.35959	12.364	0.0329	12.1187	6.1461	0.0141639	22.184	0.901682	-0.056224	-0.433344	0.265948	0.0196638	0.0184012	0.0459548	0.184593	2.3979	0.3636	0	0.453873	1.7964	1	3.2581	0.440588	0	0.100123
68	2023	M	0	1	深圳市	0.00431501	0	2.75	3	65.94	1	56.14	4	71.44	2	64.53	0.51744	3.72102	-4.19595	-0.965952	0.322334	0.0783177	5.94803	1.3905	12.725	0.0663	12.1819	6.30369	0.0131461	22.1692	0.750462	0.148596	0.857462	0.215272	0.0784918	0.00790656	0.0157416	-0.16906	2.19722	0.3333	0	0.455968	1.58979	1	3.29584	0.45302	0	0.14333	0.0086897
69	2009	L	0	0	深圳市	0.00612415	0	6	6	80.05	2	62.48	5	79.01	7	86.82	0.144053	1.34413	-3.5042	-1.12102	0.156987	0.0275685	9.733	0.930005	9.244	0	11.4379	3.48536	0.009652	24.149	0.627589	0.062049	0.169623	0.364677	0.236018	0.295963	0.295629	2.13892	2.63906	0.3571	0	0.59916	1.58658	1	2.56495	0.786583	0.6482	0.0912648	0.0075303
69	2010	L	0	0	深圳市	0.00290774	0	5.25	5	79.8	1	51.51	6	84.32	6	84.85	0.173642	3.52889	-3.46597	-1.10386	0.271613	0.00521103	9.86978	0.90881	9.835	0.0341	11.5795	3.54004	0.0104203	24.6056	0.696934	0.083966	0.254475	0.436857	-0.110461	0.403284	0.223416	0.580518	2.30259	0.5	0	0.602536	1.19947	1	2.63906	0.714085	0.3815	0.0725581	0.0084974
69	2011	L	0	0	深圳市	0.00169865	0	6.5	7	86.33	3	65.63	8	92.3	7	87.5	0.044513	4.98947	-3.45406	-1.1229	0.194845	0.00693868	9.95104	0.931098	9.888	0.0154	11.6121	3.34599	0.0061263	24.8626	0.711698	0.059053	0.200355	0.311306	-0.0277423	0.505683	0.185368	0.000375	2.3979	0.5455	0	0.595762	1.14808	1	2.70805	0.735503	0.3795	0.0843677	0.0086523
69	2012	N	0	0	深圳市	0.00241186	0	6.25	6	80.62	2	61.64	6	81.81	7	85.74	0.031575	3.00788	-3.46089	-1.14213	0.192954	0.0032826	9.97231	0.985526	9.936	0.0468	11.7219	3.3371	0.00610993	25.0137	0.699528	0.059763	0.202691	0.328291	0.0979199	0.481321	0.172612	0.28632	2.30259	0.5	0	0.609778	1.19128	1	2.77259	0.815154	0.3702	0.071656	0.0094512
69	2013	N	0	0	深圳市	0.00288711	0	6.5	6	84.93	2	64.05	7	85.78	8	91.01	0.04189	1.91128	-3.45747	-1.16265	0.191615	0.0225536	9.97367	1.03207	10.237	0.0194	11.7297	3.42302	0.00917099	25.1992	0.685297	0.061614	0.199886	0.350036	0.081908	0.524511	0.163456	0.2635	2.19722	0.5556	0	0.613178	1.05333	1	2.83321	0.73471	0.2792	0.0619825	0.0096166
69	2014	N	0	0	深圳市	0.00346741	0	6	6	84.88	3	66.08	6	84.95	8	91.01	0.074019	2.61856	-3.47868	-1.1503	0.187067	0.0179757	10.1095	1.03989	10.445	0.0314	11.915	3.44766	0.00591183	25.2758	0.660105	0.061184	0.186662	0.33617	-0.0272826	0.471859	0.164633	0.090985	2.07944	0.625	0	0.6111	1.12516	1	2.89037	0.743168	0.2476	0.0610197	0.0042064
69	2015	N	0	0	深圳市	0.00600716	0	6.75	7	85.81	3	66.08	7	89.96	7	88.39	0.027649	2.19607	-3.46866	-1.16273	0.124482	0.0154728	10.0978	1.10955	11.076	0.0448	11.9703	5.15504	0.0122448	25.4705	0.634098	0.049903	0.140905	0.306806	-0.0162433	0.444118	0.13026	0.049421	2.07944	0.625	0	0.64643	1.08276	1	2.94444	0.708574	0.2298	0.067127	0.0140465
69	2016	N	0	1	深圳市	0.0060041	0	6.25	6	82.17	2	64.28	6	82.77	7	87.5	0.013477	2.02015	-3.44287	-1.17316	0.155923	0.0164448	10.1034	1.2159	10.49	0.0818	12.0282	4.85968	0.0207014	25.7092	0.671215	0.055892	0.16194	0.271251	0.0300923	0.464459	0.0997924	0.100656	1.94591	0.5714	0	0.675701	1.04546	1	2.99573	0.752866	0.1705	0.056014	0.0148173
69	2017	N	0	1	深圳市	0.00431209	0	5.25	5	78.86	1	59.39	5	79.31	6	84.85	0.010779	2.77872	-3.3629	-1.17407	0.11698	0.0510801	10.1318	1.28451	10.61	0.0391	12.1202	4.69248	0.0156436	26.1053	0.698911	0.051227	0.164069	0.232767	-0.0354089	0.484948	0.0646419	0.193346	1.94591	0.5714	0	0.673494	1.01443	1	3.04452	0.756149	0.0856	0.0526626	0.0129765
69	2018	K	0	1	深圳市	0.00542605	0	5.75	6	84.92	2	63.6	6	84.02	8	92.79	0.004971	3.76144	-3.30232	-1.19932	0.129277	0.106396	10.124	1.32152	10.854	0.0519	12.1525	4.8295	0.0229123	26.4074	0.737692	0.044102	0.158355	0.187984	-0.0339406	0.544673	0.0494726	0.137009	2.07944	0.5	0	0.640266	0.936183	1	3.09104	0.751912	0.1129	0.0498966	0.0164398
69	2019	K	0	1	深圳市	0.00442651	0	6	6	83.07	4	71.71	6	82.35	7	87.5	0.01179	3.54392	-3.25131	-1.21759	0.142447	0.0983192	10.1268	1.38968	11.342	0.0787	12.2234	5.034	0.0203671	26.6624	0.749767	0.042487	0.1666	0.177813	-0.0136657	0.488236	0.0418791	0.246824	2.07944	0.5	0	0.635724	0.929928	1	3.13549	0.711526	0.1131	0.0462297	0.0316999
69	2020	K	0	1	深圳市	0.00472136	0	6	6	84.67	4	71.71	7	86.2	7	87.5	0.012333	2.63069	-3.22194	-1.24375	0.127048	0.0821892	10.0852	1.42588	11.673	0.0643	11.9786	5.71698	0.012166	26.847	0.75826	0.037605	0.153119	0.195808	0.0464721	0.548538	0.0406868	0.363899	1.94591	0.5714	0	0.611307	0.901594	1	3.17805	0.662499	0.1181	0.0344968	0.0179191
69	2021	K	0	1	深圳市	0.00703015	0	5.25	5	76.41	3	69.23	5	77.68	6	81.07	0.021042	3.02046	-3.2426	-1.24633	0.0553203	0.0921549	10.1075	1.36837	12.014	0.0511	12.0649	5.91092	0.0124654	26.8972	0.748394	0.015209	0.061936	0.218147	0.0400739	0.516127	0.0453753	0.253036	1.94591	0.5714	0	0.615444	0.887026	1	3.21888	0.704432	0.0771	0.0292569
69	2022	K	0	1	深圳市	0.007447	0	5.75	6	82.07	5	76.16	7	85.72	6	83.96	0.003408	4.34116	-3.3586	-1.1662	#N/A	0.0807316	9.88903	1.35959	12.364	0.0329	12.1187	6.1461	0.0141639	26.6969	0.743891	-0.02925	-0.115323	0.175874	-0.0014625	0.498898	0.0602308	-0.251663	1.94591	0.5714	0	0.616842	0.875379	1	3.2581	0.689664	0.0771	0.0383856
69	2023	K	0	1	深圳市	0.00873367	0	5.25	5	76.72	4	73.05	6	84.17	4	73.99	0.021448	4.34218	-3.41971	-1.15544	#N/A	0.0870456	9.86313	1.3905	12.725	0.0663	12.1819	6.30369	0.0131461	26.6395	0.768121	-0.022083	-0.090375	0.145937	0.00922445	0.480601	0.0602243	-0.273854	1.94591	0.5714	0	0.606357	0.859585	1	3.29584	0.664692	0.0649	0.0404954	0.0032731
70	2009	C	0	0	深圳市	0.00131456	0	4	4	71.89	1	55.35	3	69.96	6	81.64	0.638606	2.82272	-3.5467	-0.926738	0.0584116	0.016943	7.03527	0.930005	9.244	0	11.4379	3.48536	0.009652	20.9285	0.401516	0.034441	0.056844	0.739831	0.0198733	0.182345	0.12608	0.239172	2.3979	0.3636	0	0.582863	2.32821	1	2.56495	0.5839	0.0086	0.0579097	0.012088
70	2010	C	0	0	深圳市	0.0023705	0	4	4	71.42	1	53.56	4	71.68	6	80.36	0.700755	1.12265	-3.61663	-0.891007	0.0774436	0.0330508	7.2233	0.90881	9.835	0.0341	11.5795	3.54004	0.0104203	21.191	0.454388	0.044335	0.077972	0.753304	0.0420158	0.174584	0.12772	0.221102	2.3979	0.3636	0	0.588088	2.13849	1	2.63906	0.5914	0.0111	0.0988604	0.0130473
70	2011	C	0	0	深圳市	0.00335908	0	3.5	4	70.78	1	53.56	4	70.82	5	79.54	0.576224	3.98813	-3.66937	-0.915917	0.0478447	0.0205815	7.37651	0.931098	9.888	0.0154	11.6121	3.34599	0.0061263	21.3223	0.495641	0.024539	0.046862	0.729866	-0.0265586	0.181798	0.281682	0.172174	2.3979	0.3636	0	0.577426	1.43842	1	2.70805	0.572063	0.0012	0.077541	0.0027523
70	2012	C	0	0	深圳市	0.00524487	0	4	4	70.91	1	53.56	4	70.82	5	79.82	0.648819	3.1187	-3.71725	-1.01397	0.0492439	0.0203267	7.48212	0.985526	9.936	0.0468	11.7219	3.3371	0.00610993	21.4122	0.509238	0.028659	0.057634	0.844745	0.0409053	0.202731	0.16821	0.291311	2.30259	0.4	0	0.577426	1.32348	1	2.77259	0.578081	0.104	0.0763997	0.058851
70	2013	C	0	0	深圳市	0.0143279	0	3.5	3	69.96	1	53.56	2	64.8	6	81.82	0.603797	2.58128	-3.76693	-0.995864	0.0507273	0.0184706	7.57302	1.03207	10.237	0.0194	11.7297	3.42302	0.00917099	21.5357	0.482769	0.030341	0.060104	0.740589	0.0063912	0.18328	0.188218	-0.023686	2.19722	0.3333	0	0.551373	1.61967	1	2.83321	0.594009	0.0664	0.0774253	0.0714187
70	2015	C	1	0	深圳市	0.00871137	0	3	3	68.44	1	51.77	2	62.45	6	81	0.304591	1.56904	-3.87448	-1.04648	#N/A	0.0133531	8.12563	1.10955	11.076	0.0448	11.9703	5.15504	0.0122448	22.1007	0.64449	-0.086712	-0.213387	0.74544	0.0451214	0.229723	0.134115	0.280434	2.19722	0.3333	0	0.530942	2.79996	1	2.94444	0.586485	0.0347	0.0752191	0.021166
70	2016	C	1	1	深圳市	0.00476536	0	3	3	69.58	1	55.14	2	64.8	6	80.18	0.342088	2.12906	-3.91753	-1.06074	0.0786214	0.0118828	8.39886	1.2159	10.49	0.0818	12.0282	4.85968	0.0207014	22.2849	0.6724	0.031458	0.09245	1.05655	0.063039	0.224278	0.122793	0.882775	2.19722	0.3333	0	0.530942	2.15434	1	2.99573	0.603793	0.0317	0.06865	0.0133596
70	2017	C	1	1	深圳市	0.0317713	0	3	3	69.42	1	47.61	3	68.24	6	81.36	0.370021	2.53344	-3.95749	-1.03684	0.136174	0.0133266	8.50025	1.28451	10.61	0.0391	12.1202	4.69248	0.0156436	22.4902	0.688177	0.045448	0.142512	1.03076	0.0432141	0.214498	0.0982713	0.186595	2.07944	0.375	0	0.530942	1.59516	1	3.04452	0.487524	0.0228	0.0636615	0.0325687
70	2018	C	1	1	深圳市	0.044785	0	3.5	4	70.45	1	50.57	3	69.59	6	81.18	0.349191	3.39325	-3.9937	-1.04201	0.141667	0.0108974	8.33783	1.32152	10.854	0.0519	12.1525	4.8295	0.0229123	22.7	0.694881	0.046136	0.149733	0.872982	-0.0112386	0.217721	0.0965282	0.042559	2.19722	0.3333	0	0.530942	1.29828	1	3.09104	0.485964	0.0316	0.0185366	0.0683123
70	2019	C	1	1	深圳市	0.0594984	0	3	3	66	1	50.78	1	56.48	6	80.18	0.427109	3.73205	-4.03418	-1.04011	0.120869	0.0163387	8.19285	1.38968	11.342	0.0787	12.2234	5.034	0.0203671	22.6819	0.5931	0.051341	0.144398	0.604978	-0.035965	0.218876	0.0821956	-0.241438	2.19722	0.3333	0	0.439871	1.81836	1	3.13549	0.422886	0.0299	0.0297432	0.0451226
70	2020	C	1	1	深圳市	0.0833793	0	3	3	67.39	1	54.95	1	57.84	6	80.18	0.299387	2.26909	-4.05984	-1.00249	0.0199918	0.0157574	7.9645	1.42588	11.673	0.0643	11.9786	5.71698	0.012166	23.0344	0.705036	0.00679	0.019902	0.549906	0.00642022	0.219875	0.0558568	0.091044	2.07944	0.375	0	0.432154	1.43894	1	3.17805	0.446135	0.0298	0.0298556	0.042357
70	2021	C	1	1	深圳市	0.115732	0	3.75	4	72.79	2	64.94	5	75.18	4	74.02	0.354808	4.0179	-4.10897	-0.963773	#N/A	0.0201689	7.92769	1.36837	12.014	0.0511	12.0649	5.91092	0.0124654	22.8424	0.697191	-0.065421	-0.219158	0.498748	-0.0694069	0.113219	0.0615799	-0.027865	2.19722	0.3333	0	0.429798	1.34768	1	3.21888	0.419181	0.0053	0.0293909
70	2022	C	1	1	深圳市	0.0886818	0	4	4	74.22	2	64.94	5	79.22	4	73.52	0.292101	4.33696	-4.15103	-0.986666	0.0233151	0.0181377	8.02584	1.35959	12.364	0.0329	12.1187	6.1461	0.0141639	22.7867	0.699494	0.006656	0.022063	0.517583	0.0159763	0.152235	0.145216	-0.086962	2.19722	0.3333	0	0.431266	1.43569	1	3.2581	0.41706	0	0.0389488
70	2023	C	1	1	深圳市	0.11122	0	4.75	5	79.18	3	69.84	6	84.58	5	78.11	0.429973	4.31098	-4.19007	-1.00197	#N/A	0.0104247	8.07434	1.3905	12.725	0.0663	12.1819	6.30369	0.0131461	22.8136	0.692281	-0.028149	-0.0926	0.618261	0.027368	0.195924	0.16446	0.177898	2.19722	0.3333	0	0.405388	1.56869	1	3.29584	0.396805	0	0.0295916	0.0852591
78	2009	C	0	0	深圳市	0.0129759	0	4.25	4	72.33	1	49.66	6	80.46	5	79.34	0.153938	5.5919	-3.82678	-0.976234	0.000885106	0.0845238	8.03139	0.930005	9.244	0	11.4379	3.48536	0.009652	21.8753	0.781156	0.000201	0.000796	0.893053	0.0652007	0.105282	0.140637	0.225266	2.19722	0.4444	0	0.338652	3.21088	0	2.89037	0.334418	0.1933	0.061363	0.018624
78	2010	C	0	0	深圳市	0.0101948	0	4.25	4	73.34	1	53.35	9	100	4	73.14	0.396468	3.0288	-3.87549	-0.942818	0.0652328	0.0909911	8.15594	0.90881	9.835	0.0341	11.5795	3.54004	0.0104203	22.1458	0.782385	0.015118	0.069303	1.09375	0.00987436	0.119142	0.0994219	0.475642	2.3979	0.3636	0	0.282493	2.65675	0	2.94444	0.282332	0.1933	0.0519214	0.0271217
78	2011	C	0	0	深圳市	0.0219034	0	4	4	73.09	1	53.54	9	100	4	72.61	0.057036	6.16904	-3.91764	-0.953001	0.068079	0.0713226	8.33735	0.931098	9.888	0.0154	11.6121	3.34599	0.0061263	22.2992	0.799178	0.01378	0.066065	1.18111	-0.0393634	0.136741	0.085314	0.326572	2.3979	0.3636	0	0.282698	1.66727	0	2.99573	0.28804	0.1933	0.0442179	0.0140155
78	2012	F	0	0	深圳市	0.0283625	0	4	4	71.17	1	47.67	9	100	4	71.75	0.025215	5.54563	-3.95747	-0.983214	0.105748	0.0729477	8.41427	0.985526	9.936	0.0468	11.7219	3.3371	0.00610993	22.492	0.819736	0.018896	0.099685	1.19976	-0.013938	0.120224	0.0736267	0.2098	2.3979	0.3636	0	0.285685	1.46673	0	3.04452	0.293906	0.1933	0.0461735	0.0172582
78	2013	F	0	0	深圳市	0.0160641	0	4.5	4	74.29	3	66.88	9	95.12	4	70.63	0.103146	3.42843	-3.99038	-0.998311	0.138251	0.0822638	8.47595	1.03207	10.237	0.0194	11.7297	3.42302	0.00917099	22.8051	0.764565	0.033036	0.155732	1.15156	-0.0153471	0.106945	0.0730247	0.245467	2.19722	0.3333	0	0.362335	1.40379	0	3.09104	0.3693	0.1724	0.0425694	0.0166925
78	2014	F	0	0	深圳市	0	0	4.75	5	75.13	3	66.88	9	95.12	4	72.09	0.106479	3.51163	-4.02232	-1.01874	0.0492208	0.061231	8.51359	1.03989	10.445	0.0314	11.915	3.44766	0.00591183	22.9883	0.814926	0.009476	0.045567	1.11069	-0.0121973	0.104054	0.0702238	0.2263	2.3979	0.3636	0	0.264536	1.55643	0	3.13549	0.274578	0.1724	0.0400274	0.012134
78	2015	F	0	0	深圳市	0.0260412	0	4.25	4	72.83	2	61.21	8	90.23	4	72.09	0.058432	2.35593	-4.04432	-1.01342	0.319152	0.0643345	8.41228	1.10955	11.076	0.0448	11.9703	5.15504	0.0122448	23.2698	0.832078	0.046306	0.264155	0.992922	0.00709178	0.0835229	0.0357213	0.134191	2.3979	0.3636	0	0.291897	2.2074	0	3.17805	0.391639	1.4337	0.0420343	0.0059248
78	2016	F	0	1	深圳市	0.0608061	0	3.75	4	72.63	2	61.21	6	80.46	4	74.95	0.159367	3.19093	-4.06098	-1.02002	0.0927378	0.0913955	8.63337	1.2159	10.49	0.0818	12.0282	4.85968	0.0207014	23.5364	0.647212	0.033908	0.124385	0.924827	-0.0898477	0.0891251	0.0292238	0.223803	1.94591	0.4286	0	0.477432	1.45162	0	3.21888	0.497546	0.6229	0.0336564	0.0075802
78	2017	F	0	1	深圳市	0.0728157	0	4.75	5	75.54	1	59.79	9	100	4	74.25	0.059766	4.94249	-4.02361	-1.0478	0.1459	0.0813288	9.13368	1.28451	10.61	0.0391	12.1202	4.69248	0.0156436	24.1529	0.790373	0.034667	0.13343	1.04952	-0.0788259	0.107849	0.0241803	0.832999	1.94591	0.4286	0	0.498807	1.20786	0	3.2581	0.528701	0.6233	0.0266243	0.0093098
78	2018	F	0	1	深圳市	0.122882	0	4.25	4	74.01	1	57.8	9	100	4	72.4	0.034048	4.33855	-4.01643	-1.14123	0.104486	0.0775378	9.36005	1.32152	10.854	0.0519	12.1525	4.8295	0.0229123	24.4399	0.825944	0.020284	0.107147	1.06627	-0.0276019	0.0960681	0.022027	0.538952	1.94591	0.4286	0	0.487796	1.01243	0	3.29584	0.496116	0.6233	0.030602	0.0127937
78	2019	F	0	1	深圳市	0.160835	0	4	4	71.13	1	57.89	9	100	3	67.31	0.09479	3.15331	-4.05625	-1.07483	0.0701875	0.0657314	9.33539	1.38968	11.342	0.0787	12.2234	5.034	0.0203671	24.4409	0.809302	0.012514	0.068612	1.00839	0.0551061	0.0904447	0.0240991	0.081077	2.19722	0.3333	0	0.472188	1.05657	0	3.3322	0.47871	1.069	0.0290003	0.0133861
78	2020	F	0	1	深圳市	0.141024	0	1.75	1	54.61	1	55.91	1	9.77	3	68.78	0.090582	3.61145	-4.10253	-1.07054	#N/A	0.0598384	9.25761	1.42588	11.673	0.0643	11.9786	5.71698	0.012166	24.4051	0.811438	-0.001021	-0.005383	0.989568	0.0415542	0.0983208	0.0269706	-0.035433	2.19722	0.3333	0	0.464184	1.08495	0	3.3673	0.453697	1.0736	0.0265654	0.0168565
78	2021	F	0	1	深圳市	0.173516	0	2.5	3	66.76	1	56.64	4	72.05	3	67.33	0.13042	3.91492	-4.15191	-1.05445	0.0365735	0.0540784	9.17544	1.36837	12.014	0.0511	12.0649	5.91092	0.0124654	24.3504	0.805651	0.00667	0.034852	1.06185	0.0230328	0.100865	0.0315737	0.025763	2.19722	0.3333	0	0.466478	1.06087	0	3.4012	0.45282	1.0736	0.0286839
78	2022	F	0	1	深圳市	0.170453	0	3	3	67.64	1	56.64	4	71.08	4	70.11	0.028043	4.98302	-4.19804	-1.06563	#N/A	0.0533078	9.19766	1.35959	12.364	0.0329	12.1187	6.1461	0.0141639	24.3138	0.831447	-0.026867	-0.147873	1.02456	-0.00177447	0.115663	0.0318378	-0.078403	2.19722	0.3333	0	0.466374	1.07939	0	3.43399	0.455406	0.7173	0.0307218
78	2023	F	0	1	深圳市	0	0	3.25	3	66.83	1	56.64	5	76.11	2	64.21	0.104327	5.46306	-4.25659	-1.06111	#N/A	0.0595515	9.11526	1.3905	12.725	0.0663	12.1819	6.30369	0.0131461	24.1985	0.869448	-0.050148	-0.332844	1.06241	-0.0126975	0.113899	0.0321268	-0.037428	2.19722	0.3333	0	0.462002	1.13062	0	3.46574	0.455438	0.5647	0.0315739	0.009166
88	2009	G	0	0	深圳市	5.25385e-05	0	4	4	71.63	2	63.48	1	42.4	7	89.12	0.53636	-3.55037	-3.63768	-1.06245	0.0573853	0.00271782	6.51619	0.930005	9.244	0	11.4379	3.48536	0.009652	22.305	0.0794906	0.10956	0.119095	0.085093	0.0425204	5.6296e-05	0.070434	-0.06604	2.19722	0.3333	0	0.699777	1.39373	1	2.56495	0.709178	0.0099	0.104435	0.0010157
88	2010	G	0	0	深圳市	3.60976e-05	0	4	4	74.89	2	61.76	1	59.35	7	89.12	0.593425	-1.66971	-3.67782	-0.998137	0.103433	0.000586311	6.52796	0.90881	9.835	0.0341	11.5795	3.54004	0.0104203	22.3277	0.0786573	0.094941	0.103092	0.084757	0.0445464	5.36502e-05	0.0638439	0.038649	2.19722	0.3333	0	0.68044	1.19985	1	2.63906	0.682091	0.0099	0.133858	0.0046426
88	2011	G	0	0	深圳市	0.000509101	0	4.75	5	75.17	2	62.75	1	59.35	7	89.12	0.780255	-3.2656	-3.71793	-1.02945	-0.0106405	0.00153455	6.29895	0.931098	9.888	0.0154	11.6121	3.34599	0.0061263	22.4123	0.0770735	0.090314	0.097937	0.069447	0.0239007	1.12381e-05	0.0355287	-0.134743	2.19722	0.3333	0	0.701971	1.46503	1	2.70805	0.707425	0.0099	0.157694	0.0087606
88	2012	G	0	0	深圳市	0	0	3.5	3	66.66	2	60.54	1	34.8	6	84.16	0.482983	-0.180862	-3.75796	-1.03504	0.0537776	0.00149741	6.27099	0.985526	9.936	0.0468	11.7219	3.3371	0.00610993	22.3896	0.0749291	0.082953	0.089778	0.059115	0.0186657	4.20339e-06	0.0360436	-0.122776	2.19722	0.3333	0	0.71117	1.56111	1	2.77259	0.742402	0.005	0.189211	0.0069462
88	2013	G	0	0	深圳市	0	0	3.75	4	72.95	2	61.03	1	51.47	7	89.12	0.540778	0.272316	-3.79781	-1.04617	0.0759875	0.000976005	6.27476	1.03207	10.237	0.0194	11.7297	3.42302	0.00917099	22.4437	0.0859551	0.07808	0.084924	0.056563	0.0192043	5.8075e-06	0.0316054	-0.027711	2.19722	0.3333	0	0.681574	2.18903	1	2.83321	0.683843	0.005	0.159607	0.0124435
88	2014	G	0	0	深圳市	0	0	3.75	3	69.48	2	61.76	1	59.35	5	78.29	0.400534	0.05915	-3.83508	-1.04893	0.0720621	0.000437187	6.286	1.03989	10.445	0.0314	11.915	3.44766	0.00591183	22.644	0.188218	0.076284	0.088929	0.048473	0.017278	0	0.0242172	-0.022245	2.19722	0.3333	0	0.696024	2.99932	1	2.89037	0.696881	0.0037	0.179578	0.0147286
88	2015	G	0	0	深圳市	0	0	3.25	4	71.24	2	61.03	1	56	6	83.7	0.404052	0.28328	-3.871	-1.05605	0.0847001	0.000560898	6.30262	1.10955	11.076	0.0448	11.9703	5.15504	0.0122448	22.7874	0.229364	0.071088	0.090015	0.033855	0.00202248	0	0.0202284	-0.172638	2.19722	0.3333	0	0.734484	2.35423	1	2.94444	0.786616	0.0037	0.273076	0.0042138
88	2016	G	0	1	深圳市	0.000620349	0	4	4	72.6	2	61.03	1	56	7	86.41	0.346067	0.787966	-3.90929	-1.06026	0.0577471	0.00585314	6.40357	1.2159	10.49	0.0818	12.0282	4.85968	0.0207014	22.8343	0.215342	0.047694	0.061318	0.035168	0.00673007		0.0384939	0.139907	2.19722	0.3333	0	0.734484	1.89242	1	2.99573	0.783706	0	0.227203	0.0046545
88	2017	G	0	1	深圳市	0.000807452	0	4	4	73.57	3	67.37	1	57.48	6	84.16	0.28329	1.3421	-3.94411	-1.05337	0.0586629	0.0131091	6.57088	1.28451	10.61	0.0391	12.1202	4.69248	0.0156436	22.9529	0.238875	0.049319	0.063869	0.03917	0.0106516	3.50368e-05	0.055555	0.211611	2.19722	0.3333	0	0.734309	1.84136	1	3.04452	0.78235	0	0.274604	0.0135243
88	2018	G	0	1	深圳市	0.000855301	0	4.75	5	76.88	2	64.36	3	65.07	7	89.12	0.139735	1.40955	-3.97859	-1.05321	0.059271	0.0123415	6.65286	1.32152	10.854	0.0519	12.1525	4.8295	0.0229123	23.0564	0.248857	0.049553	0.065557	0.041163	0.00976986	5.50841e-05	0.180984	0.17376	2.19722	0.3333	0	0.734309	1.19079	1	3.09104	0.78219	0	0.253786	0.013329
88	2019	G	0	1	深圳市	0.0048215	0	5	5	75.89	2	62.64	2	60.54	8	90.1	0.24269	1.26693	-4.01457	-1.08234	0.0467428	0.0113329	6.71296	1.38968	11.342	0.0787	12.2234	5.034	0.0203671	23.1227	0.257485	0.03699	0.049538	0.055644	0.0235562	0.00026519	0.193257	0.470478	2.19722	0.3333	0	0.734309	1.24998	1	3.13549	0.782356	0	0.174336	0.0095654
88	2020	G	0	1	深圳市	0.00414046	0	4.25	4	74.2	2	60.92	2	60.54	7	87.68	0.215106	0.914688	-4.04224	-1.09418	0.0360777	0.00917299	6.74288	1.42588	11.673	0.0643	11.9786	5.71698	0.012166	23.2967	0.2492	0.031767	0.042526	0.044031	0.0208494	0.000285346	0.262346	-0.104789	2.07944	0.25	0	0.735546	1.33344	1	3.17805	0.782744	0	0.204473	0.0103533
88	2021	G	0	1	深圳市	0.0349208	0	4	4	73.72	2	61.37	4	72.44	6	83.05	0.239501	0.964307	-4.07721	-1.05905	0.0425332	0.000862618	6.7417	1.36837	12.014	0.0511	12.0649	5.91092	0.0124654	23.3588	0.26846	0.035759	0.048267	0.050247	0.0232171	0.000456401	0.255665	0.279918	2.19722	0.3333	0	0.712876	1.12292	1	3.21888	0.758973	0	0.186651
88	2022	G	0	1	深圳市	0.00744234	0	4	4	74.16	2	61.37	4	72.83	6	83.82	0.139961	1.02279	-4.10257	-1.09748	0.0366845	0.00701937	6.79234	1.35959	12.364	0.0329	12.1187	6.1461	0.0141639	23.5203	0.337973	0.031984	0.046088	0.052567	0.0321155	0.000706276	0.23301	0.173183	2.19722	0.3333	0	0.71233	1.03348	1	3.2581	0.761901	0.0016	0.132099
88	2023	G	0	1	深圳市	0.00784647	0	4.75	5	76.47	3	68.75	5	78.04	6	80.55	0.128136	0.279776	-4.11005	-1.10691	0.0276604	0.000996014	6.80128	1.3905	12.725	0.0663	12.1819	6.30369	0.0131461	23.8151	0.32971	0.054162	0.078689	0.041095	0.021446	0.00050503	0.239309	0.119855	2.19722	0.3333	0	0.374941	1.14673	1	3.29584	0.759187	0.0008	0.181393	0.018146
89	2009	G	0	0	深圳市	0.0272156	0	5	5	75.9	2	63.32	3	68.8	7	86.07	0.438026	-1.02943	-3.59758	-1.0819	0.112178	0.0023935	8.27538	0.930005	9.244	0	11.4379	3.48536	0.009652	22.4795	0.103256	0.103893	0.118159	0.296341	0.100145	0.000291749	0.434798	0.096924	2.19722	0.3333	0	0.646563	1.50052	1	2.48491	0.673365	0.0035	0.0376111	0.0270854
89	2010	G	0	0	深圳市	0.026876	0	5	5	76.36	3	68.51	2	64.35	7	86.07	0.578191	-1.37682	-3.63597	-1.02323	0.124295	0.00138482	8.33159	0.90881	9.835	0.0341	11.5795	3.54004	0.0104203	22.6006	0.104214	0.117361	0.130949	0.308184	0.139592	0.000336313	0.409049	0.142387	2.19722	0.3333	0	0.64023	1.20645	1	2.56495	0.643033	0.0035	0.0363696	0.0142747
89	2011	G	0	0	深圳市	0.0289938	0	5	5	78.15	4	71.98	4	71.9	6	84.37	0.422086	-0.358394	-3.6648	-1.06761	0.0910628	0.00113995	8.34806	0.931098	9.888	0.0154	11.6121	3.34599	0.0061263	22.9386	0.251293	0.085006	0.104954	0.297239	0.0818508	0.000239415	0.278137	0.22842	2.19722	0.3333	0	0.645067	1.01425	1	2.63906	0.646246	0.0035	0.0317726	0.0143991
89	2012	G	0	0	深圳市	0.0276643	0	4.25	4	73.59	2	64.3	1	59.35	7	85.09	0.426013	0.767842	-3.69807	-1.07278	0.0773024	0.00119625	8.43207	0.985526	9.936	0.0468	11.7219	3.3371	0.00610993	23.0653	0.293495	0.059951	0.082547	0.252809	0.0803405	0.000226851	0.221735	0.059982	2.19722	0.3333	0	0.634419	0.919065	1	2.70805	0.639287	0.0035	0.0323317	0.0102809
89	2013	G	0	0	深圳市	0.0329564	0	4	4	72.21	2	62.09	1	59.63	6	83.44	0.305315	0.590317	-3.72966	-1.0834	0.0610918	0.00330668	8.49617	1.03207	10.237	0.0194	11.7297	3.42302	0.00917099	23.1965	0.341296	0.045728	0.067145	0.22875	0.0781861	0.000181121	0.774315	0.029568	2.19722	0.3333	0	0.653376	0.958888	1	2.77259	0.66729	0.0035	0.0329659	0.004548
89	2014	G	0	0	深圳市	0	0	4	4	70.62	2	63.81	1	56.29	6	80.76	0.299021	0.408654	-3.76471	-1.08809	0.0297414	0.000892642	8.52556	1.03989	10.445	0.0314	11.915	3.44766	0.00591183	23.2647	0.376038	0.022466	0.035304	0.241845	0.0711118	0.000340682	0.648526	0.167635	2.19722	0.3333	0	0.641964	1.14881	1	2.83321	0.649868	0.0056	0.0291985	0.0132287
89	2015	G	0	0	深圳市	0.0326311	0	3.5	3	69.99	2	63.81	1	55.1	6	80.04	0.306048	-1.16069	-3.80911	-1.09224	0.0420686	0.000561485	8.5309	1.10955	11.076	0.0448	11.9703	5.15504	0.0122448	23.2044	0.142207	0.043236	0.058636	0.239533	0.0989468	0.000369214	0.659741	-0.00698	2.19722	0.3333	0	0.606427	1.54198	1	2.89037	0.657774	0	0.0196531	0.0132211
89	2016	G	0	1	深圳市	0.0338042	0	4.25	5	76.98	4	72.48	3	68.09	6	83.44	0.220051	-1.29337	-3.846	-1.0857	0.0367636	0.000526554	8.5614	1.2159	10.49	0.0818	12.0282	4.85968	0.0207014	23.2474	0.141008	0.04706	0.054823	0.248522	0.0913975	0.000437632	0.613035	0.028368	2.19722	0.3333	0	0.64528	1.45562	1	2.94444	0.700943	0	0.027808	0.0054086
89	2017	G	0	1	深圳市	0.0443068	0	5	5	75.97	4	74.1	3	68.09	6	80.49	0.204606	-1.12627	-3.8822	0	0.0417282	0.000305325	8.60227	1.28451	10.61	0.0391	12.1202	4.69248	0.0156436	23.2972	0.144605	0.052743	0.061533	0.259471	0.0825812	0.000404277	0.563876	0.093699	2.19722	0.3333	0	0.680862	1.50481	1	2.99573	0.730239	0	0.0275209	0.0470329
89	2018	G	0	1	深圳市	0.0482566	0	4.75	5	76.46	5	75.86	3	68.09	6	80.49	0.080647	-0.903774	-3.92019	0	0.0453239	0.00344257	8.65172	1.32152	10.854	0.0519	12.1525	4.8295	0.0229123	23.3225	0.13351	0.051321	0.059605	0.270922	0.0783914	0.000421504	0.563256	0.083843	2.19722	0.3333	0	0.653126	1.32097	1	3.04452	0.736044	0	0.0288141	0.0489272
89	2019	G	0	1	深圳市	0.0754201	0	5.25	6	80	5	79.3	5	79.79	6	80.49	0.138624	-0.667793	-3.95678	0	0.0379411	0.00214364	8.63088	1.38968	11.342	0.0787	12.2234	5.034	0.0203671	23.3639	0.138555	0.044083	0.051027	0.27709	0.0687165	0.000440972	0.52679	0.057601	2.19722	0.3333	0	0.667709	1.56747	1	3.09104	0.698793	0	0.0303425	0.0429085
89	2020	G	0	1	深圳市	0.110978	0	5.25	5	77.64	5	79.3	4	70.72	5	79.77	0.135779	0.792009	-3.9902	0	0.00323271	0.00174159	8.56427	1.42588	11.673	0.0643	11.9786	5.71698	0.012166	23.4391	0.210235	0.002641	0.003204	0.205683	0.0331599	0.000571513	0.492451	-0.212741	2.19722	0.3333	0	0.647265	1.31853	1	3.13549	0.669127	0	0.0453963	0.0115293
89	2021	G	0	1	深圳市	0.223635	0	4.25	4	73.06	2	63.39	5	79.18	5	75.14	0.127344	1.44529	-3.96668	-1.0777	#N/A	0.0013758	8.50411	1.36837	12.014	0.0511	12.0649	5.91092	0.0124654	23.994	0.547947	-0.000969	-0.001685	0.159508	0.0376177	0.000284654	0.526022	0.103079	2.19722	0.3333	0	0.625079	1.11807	1	3.17805	0.664254	0.0018	0.0422726
89	2022	G	0	1	深圳市	0.292409	0	4	4	73.34	2	63.52	5	77.5	5	76.97	0.047419	3.6479	-4.01305	-1.03657	#N/A	0.000422784	8.52655	1.35959	12.364	0.0329	12.1187	6.1461	0.0141639	23.9472	0.574362	-0.043852	-0.099855	0.10382	0.0120711	0.000229697	0.527444	-0.191934	2.19722	0.3333	0	0.630782	1.21584	1	3.21888	0.666019	0.0018	0.0511137
89	2023	G	0	1	深圳市	0.289541	0	4	4	73.39	3	67.5	5	76.07	5	75.43	0.170887	2.59041	-4.05819	-1.12396	0.0372613	0.00612848	8.55968	1.3905	12.725	0.0663	12.1819	6.30369	0.0131461	23.9085	0.540009	0.016197	0.03656	0.168873	0.0476101	0.000292112	0.478872	0.559132	2.19722	0.3333	0	0.61058	1.08551	1	3.2581	0.639822	0.0018	0.0319473	0.0178201
90	2009	E	0	0	深圳市	0.00180906	0	3	3	67.4	1	49.08	2	61.82	6	80.23	0.370231	3.86815	-3.79743	-0.92975	0.0187722	0.026194	6.01127	0.930005	9.244	0	11.4379	3.48536	0.009652	22.4965	0.552343	0.010232	0.024455	0.472725	-0.00148413	0.504759	0.0335974	-0.063435	1.94591	0.4286	0	0.458369	1.45716	1	2.83321	0.488306	0.0008	0.0689718	0.0178737
90	2010	E	0	0	深圳市	0.00312968	0	2.5	2	62.05	1	48.15	1	57.99	4	71.65	0.252782	1.85519	-3.81943	-1.0488	0.0166338	0.0126701	6.96791	0.90881	9.835	0.0341	11.5795	3.54004	0.0104203	23.0417	0.539683	0.013803	0.030292	0.441925	-0.0125087	0.373991	0.0165777	0.330015	1.94591	0.4286	0	0.427276	1.06987	1	2.89037	0.471563	0.0011	0.0333348	0.0157063
90	2011	E	0	0	深圳市	0.00734633	0	2.75	3	67.86	1	46.28	3	69.21	5	77.61	0.286381	4.14511	-3.8726	-1.03089	0.0649547	0.014607	7.08924	0.931098	9.888	0.0154	11.6121	3.34599	0.0061263	22.7382	0.590704	0.023014	0.052466	0.401712	0.0192811	0.492439	0.021952	0.000216	1.79176	0.5	1	0.412963	1.00775	1	2.94444	0.802325	0.0011	0.038515	0.0108712
90	2012	E	0	0	深圳市	0.00838904	0	3	3	69.3	1	53.99	3	67.99	5	77.75	0.284424	2.93813	-3.90775	-1.05941	0.0751029	0.0145252	7.71065	0.985526	9.936	0.0468	11.7219	3.3371	0.00610993	22.8725	0.624482	0.031084	0.079523	0.382806	0.0758563	0.491499	0.0171417	-0.13155	1.94591	0.4286	0	0.393886	1.06891	1	2.99573	0.413038	0.0011	0.0439747	0.0041952
90	2013	E	0	0	深圳市	0.0117107	0	3.75	4	70.7	1	57.16	3	66.77	6	80.04	0.209541	1.31624	-3.94146	-1.07814	0.0851784	0.0157255	7.72091	1.03207	10.237	0.0194	11.7297	3.42302	0.00917099	23.0048	0.655718	0.041201	0.114807	0.491449	0.0564509	0.457913	0.0244591	0.465281	1.94591	0.4286	0	0.385277	1.03492	1	3.04452	0.383982	0	0.0294453	0.0047807
90	2014	E	0	0	深圳市	0.0293748	0	3.25	3	66.77	1	55.52	1	56.55	5	79.25	0.232567	1.44801	-3.97452	-1.07705	0.0865364	0.0205249	7.82244	1.03989	10.445	0.0314	11.915	3.44766	0.00591183	23.1236	0.664769	0.040492	0.119275	0.509032	0.0318501	0.480862	0.0173167	0.173864	1.94591	0.4286	0	0.458953	1.35623	1	3.09104	0.586635	0	0.0269351	0.0417679
90	2015	E	0	0	深圳市	0.0393663	0	3.5	3	69.49	1	55.52	3	65.26	5	79.25	0.179668	2.76475	-3.98162	-1.08419	0.0370215	0.0149973	7.90912	1.10955	11.076	0.0448	11.9703	5.15504	0.0122448	23.5299	0.625577	0.028453	0.079311	0.458123	-0.132486	0.495779	0.0105145	0.192321	1.94591	0.4286	0	0.50844	1.32628	1	3.13549	0.657784	0.0001	0.024365	0.434547
90	2016	E	0	1	深圳市	0.0294031	0	4.5	5	75.42	3	66.93	2	63.87	7	87.44	0.175328	2.11928	-4.00556	-1.08674	0.0337057	0.0102908	8.35232	1.2159	10.49	0.0818	12.0282	4.85968	0.0207014	23.6829	0.671569	0.024893	0.07119	0.346442	-0.0378982	0.57594	0.0128611	-0.017215	1.94591	0.4286	0	0.50844	1.17526	1	3.17805	0.62034	0.0001	0.0264312	0.431934
90	2017	E	0	1	深圳市	0.0999885	0	4.5	3	69.86	3	66.86	1	51.55	6	83.74	0.130953	4.01972	-4.00951	-1.0981	0.057571	0.0262868	8.69584	1.28451	10.61	0.0391	12.1202	4.69248	0.0156436	23.9734	0.74455	0.026539	0.092574	0.299428	-0.0610349	0.665288	0.0121492	0.087063	1.94591	0.4286	0	0.50844	1.13613	1	3.21888	0.622924	0.0001	0.0331427	0.445792
90	2018	E	0	1	深圳市	0.517562	0	3.5	4	72.64	3	65.09	3	66.05	6	80.82	0.115659	2.84984	-4.01932	-1.12673	0.0499946	0.00804316	8.92066	1.32152	10.854	0.0519	12.1525	4.8295	0.0229123	24.1809	0.724716	0.026954	0.101181	0.354904	-0.0155246	0.641785	0.00983318	0.512607	1.94591	0.4286	0	0.506603	0.933024	1	3.2581	0.591829	0.0083	0.0273396	0.0123352
90	2019	E	0	1	深圳市	0.102296	0	4.25	5	75.17	2	63.82	4	72.76	6	82.41	0.103793	2.60496	-4.01994	-1.13224	0.0573052	0.00595654	9.1622	1.38968	11.342	0.0787	12.2234	5.034	0.0203671	24.4199	0.760364	0.034242	0.134103	0.407061	0.00725362	0.675903	0.0101024	0.436438	1.94591	0.4286	0	0.490769	1.00602	1	3.29584	0.550244	0.0091	0.0242912	0.0109612
90	2020	E	0	1	深圳市	0.0200528	0	4	4	74.23	1	56.22	5	76.47	6	81.62	0.09094	3.0518	-4.02417	-1.13234	0.0759116	0.0106766	9.32777	1.42588	11.673	0.0643	11.9786	5.71698	0.012166	24.6151	0.774743	0.033339	0.143859	0.383481	-0.00321608	0.540714	0.00988424	0.167703	1.79176	0.5	0	0.456565	1.00126	1	3.3322	0.50458	0.0183	0.0203161	0.0150022
90	2021	E	0	1	深圳市	0.0133295	0	3.25	3	69.11	2	64.79	3	69.38	4	72.49	0.097153	2.98578	-4.02417	-1.14321	0.116175	0.00891753	9.4362	1.36837	12.014	0.0511	12.0649	5.91092	0.0124654	24.8147	0.785596	0.035868	0.163566	0.427656	0.0179191	0.476483	0.0084094	0.358816	2.07944	0.375	0	0.463881	0.968943	1	3.3673	0.510155	0.0142	0.0188913
90	2022	E	0	1	深圳市	0.0125614	0	3	3	69.84	2	63.59	3	66.75	5	77.18	0.030403	4.2585	-4.03283	-1.15145	0.107957	0.0103337	9.61407	1.35959	12.364	0.0329	12.1187	6.1461	0.0141639	24.9604	0.79643	0.030546	0.146438	0.4102	-0.0210185	0.474361	0.00705102	0.137291	2.07944	0.375	0	0.453451	0.943856	1	3.4012	0.538053	0.0056	0.0192125
90	2023	E	0	1	深圳市	0.0149637	0	4.75	5	75.05	2	63.59	6	81.77	5	79.75	0.07419	2.50205	-4.07196	-1.16102	0.110695	0.0117322	9.50144	1.3905	12.725	0.0663	12.1819	6.30369	0.0131461	24.9643	0.782588	0.021696	0.103135	0.389109	0.102153	0.380656	0.00615502	0.020228	1.94591	0.4286	0	0.44762	0.906308	1	3.43399	0.54696	0.0061	0.0192335	0.0057245
96	2009	F	0	0	深圳市	0.00281728	0	4	4	72.33	1	45.69	5	75.58	6	82.65	0.57319	0.607579	-3.51019	-0.909879	0.0731515	0.00376095	6.5903	0.930005	9.244	0	11.4379	3.48536	0.009652	21.3312	0.102706	0.063841	0.069219	0.5267	0.0127893	0.0116197	0.0875148	-0.485686	2.3979	0.3636	0	0.646326	2.29559	1	2.3979	0.64823	0.0148	0.04621	0.0188566
96	2010	F	0	0	深圳市	0.00248191	0	4.75	5	76.38	1	45.69	9	95.12	6	83.35	0.719747	-0.35675	-3.55198	-0.912161	0.0532429	0.00228345	6.53814	0.90881	9.835	0.0341	11.5795	3.54004	0.0104203	21.3513	0.0793029	0.046985	0.05168	0.743632	-0.0154782	0.0219373	0.0788241	0.489295	2.3979	0.3636	0	0.638009	1.90852	1	2.48491	0.6433	0	0.0318773	0.0145622
96	2011	F	0	0	深圳市	0.00231248	0	4.25	4	73.64	1	45.69	6	80.46	6	83.35	0.787258	-0.053641	-3.59717	-0.962331	0.0356903	0.000917293	5.9162	0.931098	9.888	0.0154	11.6121	3.34599	0.0061263	21.4113	0.0887114	0.048745	0.053224	0.75659	-0.0211741	0.0145595	0.0485657	0.058874	2.3979	0.3636	0	0.635014	1.19147	1	2.56495	0.6344	0	0.0574133	0.0110915
96	2012	F	0	0	深圳市	0.00162516	0	4	4	73.69	1	49.66	5	75.58	6	83.35	0.76654	-0.183439	-3.63718	-0.980803	0.00582857	0.000563909	5.9162	0.985526	9.936	0.0468	11.7219	3.3371	0.00610993	21.4114	0.0931204	0.010554	0.011618	0.48464	0.0120488	0.060597	0.0424704	-0.339643	2.3979	0.3636	0	0.624415	1.10829	1	2.63906	0.621301	0	0.0384457	0.0363709
96	2013	F	0	0	深圳市	0.000915859	0	4.75	5	75.96	1	51.46	7	85.35	6	83.35	0.748776	-1.42114	-3.67956	-0.991208	0.0318287	0.000624026	5.9162	1.03207	10.237	0.0194	11.7297	3.42302	0.00917099	21.4403	0.0857419	0.033838	0.03716	0.430007	0.0182061	0.0123735	0.038787	-0.100381	2.3979	0.3636	0	0.615677	1.43723	1	2.70805	0.614159	0	0.0472743	0.0525601
96	2014	F	0	0	深圳市	0.000229738	0	5	5	75.5	1	49.57	7	85.35	6	83.35	0.715914	-1.59747	-3.71895	-1.01214	0.0177946	0.00300322	5.95324	1.03989	10.445	0.0314	11.915	3.44766	0.00591183	21.4328	0.0703586	0.021367	0.023177	0.493887	0.0111827	0.00318393	0.042858	0.160775	2.3979	0.3636	0	0.649109	2.09062	1	2.77259	0.652805	0	0.0483684	0.0283573
96	2015	F	0	0	深圳市	4.10038e-05	0	5	5	75.47	1	45.69	8	90.23	6	83.35	0.732784	-2.38983	-3.76572	-0.995081	0.073814	0.00138489	5.95064	1.10955	11.076	0.0448	11.9703	5.15504	0.0122448	21.5194	0.0892185	0.070287	0.076415	0.469558	0.0259897	0.00400118	0.0346822	-0.009966	2.3979	0.3636	0	0.582439	4.06816	1	2.83321	0.573641	0	0.0499147	0.0371122
96	2016	F	0	1	深圳市	6.52866e-06	0	5	5	75.04	1	47.67	7	85.35	6	83.35	0.717425	-1.98962	-3.81219	-0.992724	0.118434	0.00160326	5.96615	1.2159	10.49	0.0818	12.0282	4.85968	0.0207014	21.6111	0.051592	0.127754	0.137303	0.389546	-0.018717	0.0141371	0.0301679	-0.092942	2.3979	0.3636	0	0.617971	3.1939	1	2.89037	0.573599	0	0.0521015	0.01617
96	2017	F	0	1	深圳市	0.000422004	0	5	5	76.09	1	48.24	8	90.23	6	83.35	0.631406	-2.13863	-3.85538	0	0.0639786	0.00169085	5.98645	1.28451	10.61	0.0391	12.1202	4.69248	0.0156436	21.6606	0.0592995	0.062204	0.065862	0.498962	0.0320053	0.00884713	0.02717	0.373527	2.3979	0.3636	0	0.633512	2.73497	1	2.94444	0.645521	0	0.0381117	0.0088454
96	2018	F	0	1	深圳市	0.00129291	0	5	5	75.6	1	46.26	8	90.23	6	83.35	0.392816	-2.89591	-3.89757	0	0.0421792	0.00133184	5.99894	1.32152	10.854	0.0519	12.1525	4.8295	0.0229123	21.6967	0.0557857	0.042965	0.045586	0.636216	0.0295086	0.00838933	0.0274749	0.330623	2.3979	0.3636	0	0.661343	1.87167	1	2.99573	0.666977	0	0.0284312	0.0166371
96	2019	F	0	1	深圳市	0.00319396	0	5	5	76.53	1	50.04	8	90.23	6	83.35	0.544073	-2.57115	-3.94343	0	0.0452384	0.0014239	5.99146	1.38968	11.342	0.0787	12.2234	5.034	0.0203671	21.804	0.0714295	0.046118	0.049273	0.580332	0.0354279	0.0044035	0.0187423	-0.018806	2.3979	0.3636	0	0.686918	2.07792	1	3.04452	0.689841	0	0.0286411	0.0177747
96	2020	F	0	1	深圳市	0.00826543	0	5	5	75.61	1	50.04	7	85.35	6	83.35	0.561329	-1.75862	-3.9855	0	0.0447464	0.00203294	5.85793	1.42588	11.673	0.0643	11.9786	5.71698	0.012166	21.847	0.0702305	0.044185	0.047552	0.408049	0.0133202	0.00354688	0.015735	-0.242911	2.3979	0.3636	0	0.693642	1.7096	1	3.09104	0.684103	0	0.0381099	0.021492
96	2021	F	0	1	深圳市	0.0075015	0	4.25	4	72.65	2	60.74	4	70.65	7	85.22	0.198525	-5.54791	-4.02562	-1.01313	-0.0281905	0.00179982	5.78383	1.36837	12.014	0.0511	12.0649	5.91092	0.0124654	21.8495	0.0550242	0.022886	0.024415	0.525864	-0.0178056	0.0203825	0.0150332	0.318102	2.3979	0.3636	0	0.693642	1.54836	1	3.13549	0.666504	0	0.0329546
96	2022	F	0	1	深圳市	0.00439977	0	4	4	72.63	2	60.74	4	70.65	7	85.18	0.609064	-1.57633	-4.0598	-1.03164	0.0167537	0.00160969	5.76832	1.35959	12.364	0.0329	12.1187	6.1461	0.0141639	21.7355	0.0547612	0.020117	0.021286	0.719781	0.0432973	0.00996743	0.0154987	0.29668	2.30259	0.4	0	0.693642	1.57431	1	3.17805	0.667571	0	0.0250585
96	2023	F	0	1	深圳市	0.00773159	0	4	4	73.19	1	59.41	5	76.21	6	84.43	0.678233	-0.225706	-4.10306	-0.967184	0.0344977	0.00166013	5.78383	1.3905	12.725	0.0663	12.1819	6.30369	0.0131461	21.7967	0.064661	0.032144	0.034191	0.899318	0.0169525	0.00650774	0.0133337	0.215462	2.3979	0.3636	0	0.695674	2.119	1	3.21888	0.69928	0	0.0201296	0.0197526
99	2009	G	0	0	深圳市	0	0	3	3	67.17	1	58.65	1	46.03	6	81.29	0.586096	1.80763	-3.53415	-1.03857	0.0610664	0.0230069	6.68835	0.930005	9.244	0	11.4379	3.48536	0.009652	21.6412	0.391922	0.04708	0.076622	0.335501	0.05616	0.0949385	0.566987	0.189289	2.70805	0.3333	0	0.481221	1.52694	1	2.3979	0.47905	0	0.0873748	0.0069442
99	2010	G	0	0	深圳市	0	0	3.75	4	71.17	1	58.65	2	64.17	6	81.29	0.572764	0.631602	-3.57447	-0.971854	0.0653398	0.0150512	6.73221	0.90881	9.835	0.0341	11.5795	3.54004	0.0104203	21.6461	0.356164	0.049815	0.079576	0.350214	0.11931	0.119848	0.645549	0.088697	2.70805	0.3333	0	0.484263	1.88266	1	2.48491	0.481636	0	0.0853101	0.0098593
99	2011	G	0	0	深圳市	0	0	4	4	71.66	2	60.37	2	64.17	6	81.29	0.58046	2.51256	-3.61896	-1.008	0.0716766	0.0109068	6.79571	0.931098	9.888	0.0154	11.6121	3.34599	0.0061263	21.7206	0.3603	0.054202	0.084468	0.377497	0.0733519	0.109704	0.619194	0.122311	2.70805	0.3333	0	0.507808	1.73385	1	2.56495	0.981649	0	0.0853243	0.0108553
99	2012	G	0	0	深圳市	0.0709917	0	4	4	70.65	2	60.37	1	59.63	6	81.29	0.508005	1.51751	-3.67107	-1.02276	0.0637163	0.0148321	6.8742	0.985526	9.936	0.0468	11.7219	3.3371	0.00610993	21.9849	0.435512	0.046483	0.077841	0.349698	0.0579936	0.0876635	0.521031	0.106163	2.70805	0.3333	0	0.483101	1.5526	1	2.63906	0.497476	0	0.0837953	0.0125142
99	2013	G	0	0	深圳市	0.151482	0	3.75	4	70.21	1	58.65	1	58.19	6	82	0.548913	1.04199	-3.71365	-1.03548	0.0659232	0.0288735	6.93731	1.03207	10.237	0.0194	11.7297	3.42302	0.00917099	22.0687	0.360138	0.052789	0.087435	0.322125	0.0790772	0.0856389	0.639281	0.087771	2.70805	0.3333	0	0.445223	1.61286	1	2.70805	0.471494	0	0.0980647	0.0161924
99	2014	G	0	0	深圳市	0	0	4	4	70.62	2	63.81	1	55.1	6	81.29	0.526811	1.21301	-3.75674	-1.03779	0.0625425	0.0104603	6.99851	1.03989	10.445	0.0314	11.915	3.44766	0.00591183	22.2172	0.388661	0.049385	0.080805	0.321425	0.0596978	0.0808777	0.599551	0.127961	2.70805	0.3333	0	0.464703	2.25949	1	2.77259	0.428995	0	0.0921666	0.0063336
99	2015	G	0	0	深圳市	0.180156	0	4	4	71.14	2	62.09	1	59.63	6	81.29	0.523544	0.793926	-3.7978	-1.04456	0.0476588	0.0092017	6.95177	1.10955	11.076	0.0448	11.9703	5.15504	0.0122448	22.325	0.432835	0.036846	0.062656	0.273869	0.0661342	0.0796416	0.665419	-0.037119	2.70805	0.3333	0	0.429738	2.23819	1	2.83321	0.438887	0	0.0943816	0.0158394
99	2016	G	0	1	深圳市	0.0697135	0	4	4	70.18	1	56.93	1	59.63	6	82.27	0.53489	1.69439	-3.83772	-0.971429	0.032191	0.0112644	6.97635	1.2159	10.49	0.0818	12.0282	4.85968	0.0207014	22.3111	0.412218	0.018204	0.031527	0.237835	0.0593834	0.0640986	0.641572	-0.091108	2.56495	0.3846	0	0.448327	1.86262	1	2.89037	0.459693	0.0001	0.0861978	0.0187115
99	2017	G	0	1	深圳市	0.0548684	0	3.25	3	67.5	1	55.32	1	51.75	6	81.29	0.493445	2.56481	-3.87778	-1.02291	0.0290522	0.00944948	6.99851	1.28451	10.61	0.0391	12.1202	4.69248	0.0156436	22.4499	0.455037	0.01818	0.032184	0.241523	-0.013247	0.0566673	0.523902	0.083483	2.70805	0.3333	0	0.45033	1.42752	1	2.94444	0.460495	0.0001	0.0998148	0.0803917
99	2018	G	0	1	深圳市	0.0646229	0	3	3	67.5	1	55.32	1	51.75	6	81.29	0.464561	1.94359	-3.91774	-1.02715	0.0470773	0.0316833	6.99393	1.32152	10.854	0.0519	12.1525	4.8295	0.0229123	22.4573	0.434482	0.028206	0.050797	0.252704	0.0412475	0.0572195	0.487382	0.122952	2.70805	0.3333	0	0.44843	1.03803	1	2.99573	0.430371	0.0001	0.0993235	0.0691151
99	2019	G	0	1	深圳市	0.0661951	0	3.25	3	66.38	1	56.93	1	59.6	4	74.67	0.489235	0.411729	-3.95747	-1.05415	0.0563276	0.00556661	6.94216	1.38968	11.342	0.0787	12.2234	5.034	0.0203671	22.4917	0.421481	0.036638	0.064038	0.27197	0.130639	0.0546147	0.396082	0.099147	2.70805	0.3333	0	0.455688	1.18558	1	3.04452	0.437602	0.0001	0.0794355	0.0465426
99	2020	G	0	1	深圳市	0.0904724	0	3	3	69.62	2	60.27	1	55.06	6	81.29	0.526629	0.545328	-3.99787	-1.06622	0.0490432	0.00767238	6.91274	1.42588	11.673	0.0643	11.9786	5.71698	0.012166	22.4303	0.347693	0.037552	0.061132	0.274017	0.0853004	0.0554219	0.41177	-0.005674	2.70805	0.3333	0	0.444551	1.16787	1	3.09104	0.440259	0.0001	0.0899103	0.0395178
99	2021	G	0	1	深圳市	0.0961056	0	4.5	5	78	3	67.63	5	79.92	6	84.24	0.488503	-1.7651	-4.03573	-1.02898	0.0391801	0.00556523	6.95273	1.36837	12.014	0.0511	12.0649	5.91092	0.0124654	22.6129	0.251649	0.041017	0.058205	0.277128	0.110162	0.0414533	0.322841	0.078522	2.77259	0.3125	0	0.461293	1.20762	1	3.13549	0.495334	0.0001	0.0397119
99	2022	G	0	1	深圳市	0.077129	0	5	5	75.67	3	67.63	5	77.72	6	80.11	0.467039	-0.53014	-4.07617	-1.06232	0.0239017	0.00756908	6.96979	1.35959	12.364	0.0329	12.1187	6.1461	0.0141639	22.5895	0.207693	0.025988	0.033748	0.274925	0.0920381	0.045802	0.338635	0.069844	2.48491	0.4167	0	0.437202	1.07455	1	3.17805	0.451751	0	0.0669556
99	2023	G	0	1	深圳市	0.0599876	0	4.5	5	77.06	3	68.1	4	74	7	85.77	0.549693	-0.688566	-4.11659	-1.06045	0.0344638	0.00732766	6.97541	1.3905	12.725	0.0663	12.1819	6.30369	0.0131461	22.5637	0.169836	0.037233	0.045911	0.308656	0.092576	0.0471581	0.398379	0.095432	2.70805	0.3333	0	0.438422	1.23212	1	3.21888	0.452712	0	0.0701517	0.0129011
100	2009	C	0	0	惠州市	0	0	4.75	5	79.09	5	78.74	3	67.69	7	86.96	0.128169	2.54565	-3.50673	-1.06496	0.0910753	0.0314329	10.7355	0.930005	9.244	0	10.4862	1.88001	0.00167993	24.1322	0.721231	0.026337	0.096113	1.65786	0.0244	0.219487	0.101508	0.152899	2.3979	0.3636	1	0.268064	1.18669	0	2.07944	0.330287	6.1495	0.0446446	0.0255061
100	2010	C	0	0	惠州市	0	0	5.75	6	82.08	5	78.74	5	78.6	7	86.14	0.074182	-1.29077	-3.44706	-1.0423	0.026811	0.0291425	10.8527	0.90881	9.835	0.0341	10.6781	1.81441	0.00206583	24.7025	0.661685	0.011286	0.035625	1.23837	0.0148762	0.143774	0.0538634	0.170396	2.3979	0.3636	1	0.286057	0.956049	0	2.19722	0.468691	5.9571	0.0416965	0.206578
100	2011	C	0	0	惠州市	0	0	5.25	5	79.11	3	65.26	5	76.75	7	87.78	0.029048	2.89967	-3.41776	-1.14372	0.0691524	0.0297667	10.9365	0.931098	9.888	0.0154	10.7217	1.73024	0.00252948	25.0275	0.739467	0.026214	0.089419	0.953022	0.022513	0.114459	0.142665	0.17205	2.07944	0.375	1	0.200418	0.9533	0	2.30259	0.208984	5.5308	0.0460836	0.218293
100	2012	C	0	0	惠州市	0	0	5.75	6	82.25	5	78.36	5	78.74	7	86.6	0.019532	3.38269	-3.44057	-1.17021	0.0492999	0.0441669	11.1409	0.985526	9.936	0.0468	10.8371	1.69313	0.00215544	25.1021	0.74628	0.016555	0.064415	0.90334	0.0491004	0.14993	0.267547	0.143154	2.07944	0.375	1	0.200197	0.980421	0	2.3979	0.311315	5.9299	0.0552747	0.216153
100	2013	C	0	0	惠州市	0	0	6	6	81.13	6	80.15	5	78.89	6	83.15	0.028868	2.37476	-3.48548	-1.16361	0.134933	0.0405004	11.2092	1.03207	10.237	0.0194	11.2656	1.79646	0.00207721	25.081	0.744391	0.036555	0.143549	1.08125	0.0663623	0.156031	0.260771	0.228598	2.19722	0.3333	1	0.192477	0.999027	0	2.48491	0.21303	6.2091	0.058562	0.0193448
100	2014	C	1	0	惠州市	0	0	5.5	5	79.15	6	80.15	4	74.9	6	81.51	0.039682	1.25888	-3.48395	-1.1744	0.148671	0.0404584	11.2427	1.03989	10.445	0.0314	11.0613	1.77523	0.00658733	25.2545	0.710795	0.049518	0.180814	1.18192	0.0582733	0.101458	0.218043	0.184058	2.19722	0.3333	1	0.190067	1.08394	0	2.56495	0.253886	6.9145	0.060269	0.012505
100	2015	C	1	0	惠州市	0	0	5.25	6	80.32	6	83.2	4	72.74	6	83.96	0.017084	0.913142	-3.47682	-1.18477	0.0636492	0.0381437	10.3026	1.10955	11.076	0.0448	11.1009	1.93529	0.00630395	25.4396	0.663286	0.031569	0.100171	1.02212	0.0661634	0.080789	0.233029	0.035147	2.48491	0.3333	1	0.234105	1.09522	0	2.63906	0.371788	5.2854	0.0649553	0.0150702
100	2016	C	1	1	惠州市	0	0	5	5	76.85	5	78.04	3	68.65	6	81.77	0.007751	1.12251	-3.44132	-1.17719	0.0260272	0.026715	11.2843	1.2159	10.49	0.0818	11.1789	2.25659	0.00639453	25.7146	0.689087	0.016513	0.051275	0.822533	0.0545615	0.0871641	0.256364	0.018111	2.48491	0.3333	1	0.25099	0.972744	0	2.70805	0.398419	5.2917	0.0797601	0.0112127
100	2017	C	1	1	惠州市	0	0	5.75	6	81.55	5	77.64	5	77.96	7	85.96	0.009562	1.57344	-3.45648	-1.17542	0.0422179	0.0240408	11.226	1.28451	10.61	0.0391	11.2923	2.32201	0.00674759	25.8003	0.662227	0.02306	0.070972	0.72587	0.0574545	0.080766	0.203364	0.047936	2.48491	0.3333	1	0.270736	0.994039	0	2.77259	0.43335	4.7822	0.0847487	0.0113242
100	2018	C	1	1	惠州市	0	0	5.5	6	80.2	6	81.22	4	70.9	7	85.96	0.004116	1.62858	-3.44085	-1.18751	0.0465986	0.0296704	11.4048	1.32152	10.854	0.0519	11.3553	2.55675	0.00540412	25.9847	0.684216	0.023029	0.07069	0.642161	0.0544011	0.103173	0.186669	0.015977	2.48491	0.3333	1	0.259813	0.875775	0	2.83321	0.363074	4.7887	0.0379288	0.0191488
100	2019	C	1	1	惠州市	0	0	6	6	81.48	4	74.62	6	80.31	7	85.77	0.01405	1.9585	-3.52823	-1.17822	0.03743	0.0166826	10.4739	1.38968	11.342	0.0787	11.3626	2.81018	0.00602966	25.8283	0.612465	0.020457	0.058639	0.419079	0.0697025	0.0344443	0.275769	-0.338982	2.19722	0.4444	1	0.247847	0.980635	0	2.89037	0.29844	6.0129	0.0252904	0.0216549
100	2020	C	1	1	惠州市	0	0	5.25	5	77.28	3	69.67	3	67.77	7	87.59	0.008467	1.42399	-3.42708	-1.20461	0.0390135	0.0108319	10.7887	1.42588	11.673	0.0643	11.159	3.23216	0.00581862	26.2759	0.650817	0.023963	0.065807	0.362752	0.064745	0.0342562	0.359934	0.023276	2.30259	0.4	1	0.235926	1.03247	0	2.94444	0.284481	5.815	0.0309137	0.0214103
100	2021	C	1	1	惠州市	0	0	5.5	6	80.57	4	74.92	6	82.01	6	82.48	0.013281	1.08168	-3.40551	-1.24007	0.120369	0.0144417	11.0846	1.36837	12.014	0.0511	11.3159	3.07693	0.00474589	26.4557	0.612464	0.052799	0.142669	0.577228	0.106495	0.0456166	0.367888	1.13284	2.3979	0.3636	1	0.233872	0.897539	0	2.99573	0.220892	5.8169	0.0268638
100	2022	C	1	1	惠州市	0	0	5.25	5	77.24	4	74.92	6	81.91	5	75.08	0.001973	2.59514	-3.39072	-1.15857	0.0137177	0.0112036	11.1538	1.35959	12.364	0.0329	11.3982	3.12555	0.00505253	26.6094	0.632943	0.005347	0.014202	0.498105	0.0511849	0.0500037	0.367999	0.018419	2.19722	0.4444	1	0.171958	0.84755	0	3.04452	0.24436	4.7831	0.0212582
100	2023	C	1	1	惠州市	0	1	5	5	76.15	5	75.75	6	81.01	4	72.85	0.013104	2.2907	-3.40819	-1.22938	0.0230898	0.0149059	11.2281	1.3905	12.725	0.0663	11.4407	3.37288	0.0037605	26.6709	0.620576	0.012871	0.034468	0.46945	0.0661203	0.048273	0.460804	0.046915	2.3979	0.3636	1	0.216287	0.837596	0	3.09104	0.307024	4.8117	0.0274321	0.0237074
150	2009	K	0	0	汕头市	0	0	2	#N/A	#N/A	#N/A	#N/A	#N/A	#N/A	#N/A	#N/A	0.753101	3.74312	-3.69411	-0.869731	0.160071	0.00660204	4.92725	0.930005	9.244	0	9.92255	2.11758	0.00127478	20.8312	0.347549	0.08598	0.147424	0.310751	-0.0737615	0.866203	0.00764743	-0.265198	1.94591	0.4286	1	0.515849	1.85231	0	2.83321	0.512023	0	0.0312234	0.0358324
150	2010	K	0	0	汕头市	0	0	2.75	#N/A	#N/A	#N/A	#N/A	#N/A	#N/A	#N/A	#N/A	0.779652	2.90948	-3.72356	-0.843853	0.0137273	0.00262814	4.94164	0.90881	9.835	0.0341	10.069	2.09644	0.00119862	20.7542	0.285637	0.009301	0.013634	0.073569	-0.122632	0.903059	0.00929055	-0.782278	1.94591	0.4286	0	0.509231	1.89713	0	2.89037	0.4984	0	0.173429	0.0491954
150	2011	K	0	0	汕头市	0	0	2.25	#N/A	#N/A	#N/A	#N/A	#N/A	#N/A	#N/A	#N/A	0.707138	3.66262	-3.80934	-0.925781	0.0113472	0.0119968	5.07517	0.931098	9.888	0.0154	10.0688	2.12989	0.00194851	21.1221	0.528672	0.006093	0.010521	0.081274	0.0582388	0.765713	0.0125053	0.331958	1.94591	0.4286	0	0.521809	1.24624	0	2.94444	0.4984	0	0.109741	0.0157257
150	2012	K	0	0	汕头市	0	0	2.5	#N/A	#N/A	#N/A	#N/A	#N/A	#N/A	#N/A	#N/A	0.656659	5.08772	-3.8603	-0.897877	0.0033188	0.00760349	5.1358	0.985526	9.936	0.0468	10.1747	2.10642	0.00168083	21.2273	0.574363	0.001482	0.003313	0.053985	-0.000312105	0.751411	0.0341561	-0.19227	1.94591	0.4286	0	0.549383	1.52163	0	2.99573	0.536878	0	0.130162	0.0052098
150	2013	K	0	0	汕头市	0	0	2	#N/A	#N/A	#N/A	#N/A	#N/A	#N/A	#N/A	#N/A	0.610547	6.71874	-3.93907	-1.1584	0.130425	0.00371789	5.17615	1.03207	10.237	0.0194	10.275	2.23646	0.00168305	21.7225	0.706744	0.042045	0.122441	0.333634	-0.294141	0.804345	0.019281	7.58918	1.94591	0.4286	0	0.532552	1.35447	0	3.04452	0.5313	0	0.0533033	0.0116467
150	2014	K	0	0	汕头市	0	0	2.25	#N/A	#N/A	#N/A	#N/A	#N/A	#N/A	#N/A	#N/A	0.404759	4.95907	-3.97475	-0.906109	0.0374404	0.0107798	5.14749	1.03989	10.445	0.0314	10.3482	2.17726	0.00122207	21.6506	0.673085	0.011374	0.036753	0.060136	-0.0489325	0.921672	0.0183827	-0.783791	1.94591	0.4286	0	0.576263	2.90596	0	3.09104	0.670376	0	0.16783	0.0179687
150	2015	K	0	0	汕头市	0	0	2.75	#N/A	#N/A	#N/A	#N/A	#N/A	#N/A	#N/A	#N/A	0.415954	1.20819	-4.03703	-1.11869	0.0338166	0.080476	9.36956	1.10955	11.076	0.0448	10.4262	2.17138	0.0018284	22.2383	0.630016	0.01556	0.043879	0.291415	0.0828218	0.509846	0.0125096	5.54029	1.94591	0.4286	0	0.62971	3.44557	0	3.13549	0.556601	0	0.0420259	0.0197468
150	2016	Q	0	1	汕头市	0	0	3	#N/A	#N/A	#N/A	#N/A	#N/A	#N/A	#N/A	#N/A	0.230616	2.36227	-4.07377	-1.01444	0.327008	0.0617248	9.40096	1.2159	10.49	0.0818	10.5292	2.12838	0.00280523	22.6973	0.65133	0.126427	0.354214	0.220681	-0.0785913	0.0180337	0.112044	0.257199	1.94591	0.4286	0	0.651097	2.24191	0	3.17805	0.572385	0	0.106485	0.0366067
150	2017	Q	0	1	汕头市	0	0	3	#N/A	#N/A	#N/A	#N/A	#N/A	#N/A	#N/A	#N/A	0.157016	4.22599	-4.11211	-1.01214	0.0624445	0.0703302	9.79935	1.28451	10.61	0.0391	10.6461	2.05965	0.00209275	22.7541	0.68845	0.024873	0.075469	0.285578	0.00564056	0.0208473	0.110659	0.632274	1.94591	0.4286	0	0.650917	2.24506	0	3.21888	0.560897	0	0.0779782	0.0993252
150	2018	Q	0	1	汕头市	0	0	2.25	#N/A	#N/A	#N/A	#N/A	#N/A	#N/A	#N/A	#N/A	0.159411	4.18031	-4.14921	-0.987097	0.0864625	0.0795565	9.52281	1.32152	10.854	0.0519	10.7071	2.18334	0.00158416	22.8364	0.695233	0.025228	0.081822	0.277071	0.0450484	0.0184055	0.0868714	0.041503	1.94591	0.4286	0	0.62706	1.74503	0	3.2581	0.509059	0	0.118691	0.091065
150	2019	Q	0	1	汕头市	0	0	1.75	#N/A	#N/A	#N/A	#N/A	#N/A	#N/A	#N/A	#N/A	0.335772	4.98107	-4.19732	-0.973819	#N/A	0.0649625	9.37246	1.38968	11.342	0.0787	10.772	2.22088	0.00236901	22.507	0.846754	-0.218447	-0.905014	0.251966	0.026439	0.0348692	0.109747	-0.186825	1.79176	0.5	0	0.581533	1.50793	0	3.29584	0.487938	0	0.114128	0.0878089
150	2020	Q	0	1	汕头市	0	0	1	#N/A	#N/A	#N/A	#N/A	#N/A	#N/A	#N/A	#N/A	0.416493	4.91369	-4.23791	-0.963582	#N/A	0.0956986	9.03765	1.42588	11.673	0.0643	10.813	2.30289	0.00201022	22.3512	0.94591	-0.111263	-1.0348	0.282774	0.03574	0.00328515	0.125562	-0.128662	1.79176	0.5	0	0.549833	1.41874	0	3.3322	0.48057	0	0.108506	0.073605
150	2021	Q	0	1	汕头市	0	0	2.25	2	64.4	1	58.75	3	69.23	2	63.23	0.265577	5.39054	-4.27615	-0.937101	#N/A	0.126144	8.96201	1.36837	12.014	0.0511	10.88	2.37952	0.00222143	22.18	1.07405	-0.14966	-67.5042	0.281812	0.0276656	0.00346883	0.14714	-0.145511	1.94591	0.4286	1	0.521738	1.84547	0	3.3673	0.431961	0	0.131663
151	2009	O	0	0	北京市	0.00174332	0	4.75	4	74.88	1	45.69	9	100	5	79.11	0.678336	0.630679	-3.45472	-0.998932	0.00940124	0.0133691	5.74939	3.67187	8.658	0.1022	11.1627	6.34372	0.0103931	20.8358	0.197865	0.025569	0.032428	0.620774	0.0077259	0.0965344	0.0720747	0.101229	2.19722	0.3333	0	0.521646	2.20198	1	2.3979	0.527851	0	0.0646534
151	2010	F	0	0	北京市	0.00127886	0	3.5	4	72.53	1	45.69	7	85.35	5	79.8	0.687215	2.33409	-3.49096	-0.934906	0.00207848	0.0388445	5.67332	3.59039	8.907	0.1076	11.2377	6.3922	0.0126768	20.8078	0.190006	0.00702	0.00871	0.847952	-0.120088	0.1226	0.084455	0.32557	2.19722	0.3333	0	0.492205	3.28812	1	2.48491	0.484741	0	0.050971	0.0700253
151	2011	F	0	0	北京市	0.0229187	0	4	4	71.23	1	45.69	6	80.46	5	79.11	0.730363	1.47429	-3.54222	-0.893099	#N/A	0.0410501	5.66296	3.7861	8.868	0.1104	11.3103	6.25619	0.0112648	20.8932	0.272902	-0.009551	-0.012456	0.913507	0.131296	0.163703	0.0727858	0.109551	2.19722	0.3333	0	0.488051	2.27933	1	2.56495	0.86757	0	0.0432408	0.0138712
151	2012	F	0	0	北京市	0.0210039	0	4	4	71.03	1	47.67	7	85.35	5	76.32	0.538585	-2.99443	-3.62093	-1.03476	0.0264486	0.030769	5.54518	3.89531	8.895	0.1063	11.3791	6.28623	0.0111829	21.2336	0.45525	0.030937	0.049854	1.17449	0.325505	0.108556	0.0490695	0.612361	2.19722	0.3333	0	0.509137	1.60706	1	2.63906	0.51	0	0.0268265	0.0039399
151	2013	F	0	0	北京市	0.0189718	0	4.25	4	74.77	1	59.12	5	75.58	6	81.19	0.242571	-6.02342	-3.69379	-1.02581	0.00384724	0.00898195	5.45532	4.03198	9.282	0.1207	11.4426	6.25535	0.0120342	21.6355	0.606677	0.044539	0.098099	0.748414	0.293236	0.0299147	0.0327492	-0.071164	2.19722	0.3333	0	0.514878	1.42726	1	2.70805	0.509136	0	0.0405658	0.0029777
151	2014	F	0	0	北京市	0	0	4.75	5	77.84	3	69.61	6	80.46	6	80.49	0.103354	-5.22533	-3.74296	-1.06745	-0.00565111	0.0150393	5.7301	4.13578	9.212	0.1277	11.5129	6.23469	0.0132537	21.7947	0.656582	0.041665	0.113717	0.938325	0.263171	0.0309535	0.0127841	0.632005	2.19722	0.3333	0	0.504649	2.41892	1	2.77259	0.535107	0	0.0324969	0.0052242
151	2015	F	0	0	北京市	0.0275973	0	5.75	6	81.01	3	67.63	9	100	6	80.49	0.490142	0.55461	-3.7718	-0.961534	0.0159374	0.0723584	5.94803	4.57462	9.192	0.1279	11.5759	7.43604	0.0125049	21.6052	0.579701	0.050351	0.133124	0.454495	-0.186646	0.0334608	0.0162763	-0.52228	2.19722	0.3333	0	0.469792	3.3182	1	2.83321	0.474174	0	0.0542698	0.0090739
151	2016	F	0	1	北京市	0.257135	0	5.5	6	80.44	2	61.85	9	100	6	81.96	0.521174	0.778257	-3.80036	-0.991151	0.0122629	0.0142881	6.00389	4.76782	9.171	0.1254	11.6801	7.37893	0.0111332	21.4502	0.517535	0.044994	0.100214	0.788226	-0.169417	0.0459164	0.0160306	0.457696	2.07944	0.375	0	0.466745	3.08957	1	2.89037	0.4592	0	0.0434406	0.0216101
151	2017	F	0	1	北京市	0.241717	0	5.75	5	78.83	2	62.42	9	95.12	6	80.49	0.555274	-1.52344	-3.84364	-0.985554	0.0147955	0.0126405	5.97381	4.89399	9.236	0.1371	11.7675	7.18669	0.0129116	21.4919	0.54077	0.041858	0.088945	1.05482	0.0503046	0.100693	0.0295149	0.260975	2.19722	0.3333	0	0.466808	2.10775	1	2.94444	0.463453	0.0017	0.0431586	0.0314122
151	2018	F	0	1	北京市	0.265422	0	5.25	5	78.55	4	74.72	7	85.35	5	77.95	0.723557	3.1019	-3.88367	-0.962431	0.0248166	0.0163749	5.95064	5.02215	9.239	0.1438	11.8509	7.50581	0.0140459	21.4923	0.536344	0.038671	0.083804	0.589063	-0.213035	0.325011	0.0278183	-0.429808	2.19722	0.3333	0	0.466574	1.84747	1	2.99573	0.470374	0	0.0690001	0.0221036
151	2019	F	0	1	北京市	0.261412	0	5	5	77.71	4	72.92	7	85.35	5	77.26	0.730544	4.32069	-3.93115	-0.982018	0.00299575	0.0184289	5.86363	5.23404	9.512	0.1348	12.009	6.72657	0.0122534	21.5956	0.60374	0.003847	0.008983	0.520246	-0.219915	0.377856	0.0241767	-0.068564	2.19722	0.3333	0	0.47892	1.81291	1	3.04452	0.476444	0	0.0576952	0.0218498
151	2020	F	0	1	北京市	0.248205	0	5	5	77.2	4	72.92	6	80.46	5	77.95	0.621015	3.28702	-3.94859	-0.921405	#N/A	0.0252326	5.78996	5.24401	9.813	0.1321	12.013	7.26091	0.0113831	21.3138	0.64677	-0.138514	-0.366674	0.372054	0.0141497	0.165939	0.0283865	-0.340279	2.19722	0.3333	0	0.476964	1.88249	1	3.09104	0.458002	0	0.148421	0.0144977
151	2021	F	0	1	北京市	0.370966	0	4.25	4	71.18	1	59.46	5	77.13	4	73.29	0.565303	2.05894	-4.03236	-1.01051	0.0472758	0.0293989	7.05099	4.53988	10.123	0.1365	12.1226	6.90792	0.0111608	22.0243	0.608654	0.019198	0.043521	0.638941	-0.00469545	0.0958333	0.0177602	1.76573	2.30259	0.4	0	0.538107	1.30834	1	3.13549	0.525953	0	0.0912781	0.0220123
151	2022	F	0	1	北京市	0.374458	0	3.75	3	69.96	1	59.46	5	76.99	4	70.81	0.234706	3.26144	-4.07703	-1.01279	#N/A	0.0798753	7.04665	5.24349	10.444	0.14	12.1564	7.40053	0.0117446	22.2383	0.732907	-0.114113	-0.353733	1.0269	0.0226614	0.0308407	0.0135764	0.954988	2.3979	0.3636	0	0.540623	1.53418	1	3.17805	0.528149	0	0.0409112
151	2023	F	0	1	北京市	0.27996	0	4	4	71.04	1	59.46	4	74.84	4	74.41	0.41381	1.98157	-4.10856	-0.970172	#N/A	0.0594234	6.85013	5.68984	10.774	0.1442	12.2075	7.97605	0.0119263	21.9177	0.742239	-0.126489	-0.48059	0.781315	0.181559	0.0386995	0.0221494	-0.273492	2.3979	0.3636	0	0.530123	1.71101	1	3.21888	0.535112	0	0.0671044
153	2009	C	0	0	芜湖市	0.00778449	0	3.75	4	72.95	1	57.61	4	70.19	6	82.64	0.666819	3.30902	-3.54439	-0.925278	0.0361944	0.0513203	8.44656	0.927765	7.476	0.0385	10.575	1.94926	0.00805211	20.9101	0.436987	0.019997	0.035575	0.806144	0.0268817	0.110062	0.378839	0.093714	1.94591	0.2857	0	0.469862	1.87515	0	2.56495	0.50567	0	0.0800729	0.0562278
153	2010	C	0	0	芜湖市	0.0097817	0	3.25	3	68.31	1	51.08	2	63.77	6	80.18	0.745447	2.11873	-3.59145	-0.881317	0.0567422	0.0169211	8.49862	0.821332	7.676	0.0744	10.7853	2.02655	0.00902875	20.9669	0.40916	0.032625	0.056512	0.86582	0.0431385	0.119981	0.374205	0.123979	2.19722	0.3333	0	0.42407	2.28773	0	2.63906	0.467336	0	0.0789569	0.062207
153	2011	C	0	0	芜湖市	0.00833841	0	3	3	69.86	1	54.24	3	67.61	5	79.36	0.641381	3.63866	-3.63539	-0.906181	0.0131388	0.0177252	8.51037	0.760503	7.783	0.0722	10.6712	1.83979	0.00880046	20.9996	0.419497	0.007651	0.013066	1.1692	0.0417708	0.135913	0.365048	0.411761	2.19722	0.3333	0	0.409648	1.5463	0	2.70805	0.408354	0	0.0671304	0.121418
153	2012	C	0	0	芜湖市	0.00716186	0	3.5	3	69.53	1	56.03	3	68.83	5	76.9	0.609667	3.0753	-3.68639	-0.988595	-0.0101018	0.0197537	8.60649	0.765063	7.999	0.0695	10.7943	1.89511	0.0108754	21.0952	0.465688	0.01304	0.023509	1.19488	0.0314725	0.139003	0.360072	0.093161	2.19722	0.3333	0	0.408768	1.55739	0	2.77259	0.408489	0	0.0726991	0.448341
153	2013	C	0	0	芜湖市	0.0061459	0	3.75	4	72.4	1	54.24	4	72.17	6	81.82	0.591652	2.63386	-3.7568	-0.918121	0.0264702	0.0118405	8.51559	0.799091	8.273	0.0716	10.9066	1.92138	0.0125423	21.4069	0.467801	0.015846	0.029725	0.891676	-0.0354925	0.107148	0.319127	-0.077132	2.19722	0.3333	0	0.274999	1.51811	0	2.83321	0.429118	0	0.0808405	0.734537
153	2014	C	1	0	芜湖市	0	0	3.25	3	69.12	1	54.24	2	62.77	6	81	0.622874	2.81343	-3.8064	-0.940284	0.0371818	0.0126794	8.45596	0.841524	8.839	0.0328	11.0672	1.90952	0.0148458	21.5286	0.487414	0.019143	0.036277	0.790999	0.00469736	0.113458	0.273039	0.110496	2.19722	0.3333	0	0.301406	2.15019	0	2.89037	0.543462	0	0.0858714	0.0219076
153	2016	C	1	1	芜湖市	0.0138476	0	3	3	68.53	1	50.87	2	64.63	6	80.18	0.637832	2.53665	-3.8938	-0.944292	0.0412905	0.0220184	8.43229	1.06798	8.49	0.0558	11.208	2.12526	0.0191833	21.6357	0.537108	0.018953	0.038872	0.843199	0.0314057	0.110176	0.338858	0.308429	2.19722	0.3333	0	0.326719	2.15212	0	2.99573	0.338845	0	0.0792372	0.0211041
153	2017	C	1	1	芜湖市	0.015586	0	3	3	67.97	1	45.82	3	67.84	5	79.36	0.660221	2.76351	-3.94013	0	0.0565723	0.00912153	8.42749	1.13654	8.738	0.0524	11.2955	2.15879	0.0193757	21.7413	0.559038	0.024856	0.055071	0.980624	0.0189308	0.145346	0.289089	0.267702	2.19722	0.3333	0	0.297248	1.45775	0	3.04452	0.320801	0.3221	0.0691586	0.0265116
153	2018	C	1	1	芜湖市	0.0117654	0	3	3	65.93	1	45.61	2	64.63	5	77.18	0.656942	1.53918	-3.98444	0	0.022965	0.0162515	8.46758	1.22591	8.859	0.0502	11.3861	2.16563	0.0182459	21.8245	0.570549	0.021022	0.048329	1.04347	0.0776571	0.153255	0.252264	0.168841	2.19722	0.3333	0	0.321633	1.11159	0	3.09104	0.339893	0	0.0462516	0.0277753
153	2019	C	1	1	芜湖市	0.0108016	0	3	3	68.26	1	47.4	4	70.82	5	77.18	0.630034	2.98042	-4.03134	-0.964264	0.0646673	0.0112189	8.44849	1.2665	9.194	0.0671	11.4737	2.17716	0.014138	21.9929	0.627174	0.024548	0.06156	0.986071	0.0186013	0.136759	0.201525	0.074557	2.07944	0.375	0	0.307497	1.20669	0	3.13549	0.3267	0	0.0452443	0.0147425
153	2020	C	1	1	芜湖市	0.0079974	0	3	3	66.92	1	47.59	3	65.12	5	78	0.566625	2.32283	-4.07204	-0.966827	0.0758585	0.0127169	8.4242	1.29203	9.528	0.0726	11.5421	2.33078	0.0145199	22.0142	0.601789	0.028377	0.073581	0.923086	0.0805106	0.144973	0.185682	0.025669	2.19722	0.3333	0	0.326719	1.35702	0	3.17805	0.3267	0	0.0410632
153	2021	C	1	1	芜湖市	0.00593653	0	3.75	4	73.88	1	56.41	5	75.22	6	80.91	0.549864	2.46511	-4.11348	-1.0057	0.0528948	0.00930101	8.42024	1.27384	9.875	0.0773	11.6744	2.30306	0.0163099	22.0626	0.591833	0.029378	0.072842	0.939725	0.0623326	0.149235	0.184683	0.054344	2.19722	0.3333	0	0.313905	1.57139	0	3.21888	0.364583	0	0.0422423
153	2022	C	1	1	芜湖市	0.0102807	0	4.25	5	75.21	1	56.41	5	78.86	6	81.01	0.430868	2.52106	-4.15679	-1.03834	0.0719158	0.0107548	8.44548	1.28961	10.234	0.0669	11.7087	2.45834	0.016224	22.2205	0.607369	0.035398	0.085613	0.938996	0.0984486	0.156436	0.218538	0.143461	2.19722	0.3333	0	0.285996	1.57773	0	3.2581	0.303894	1.5627	0.0416576	0.012405
153	2023	C	1	1	芜湖市	0.00907904	0	4.25	4	73.76	1	56.41	5	76.63	5	79.51	0.520894	2.6091	-4.19653	-1.04628	0.059345	0.00820607	8.44891	1.30789	10.606	0.0883	11.7492	2.68683	0.0164903	22.2029	0.563041	0.035505	0.085637	0.965049	0.0580126	0.130616	0.214702	0.067786	2.19722	0.3333	0	0.28607	1.26098	0	3.29584	0.305828	1.5631	0.04622	0.012685
155	2009	C	0	0	成都市	0.00929905	0	4.75	5	77.06	2	63.9	4	72.17	7	87.09	0.49001	1.75286	-3.62748	-1.02778	0.0261765	0.00293334	8.49229	0.808176	7.521	0.2	10.4692	4.94943	0.00205761	21.8916	0.396789	0.023642	0.037854	0.729172	0.111347	0.0757734	0.571678	-0.147918	1.60944	0.4	0	0.650407	1.70598	1	2.56495	0.654911	0.0001	0.114618	0.008677
155	2010	C	0	0	成都市	0.00729874	0	5	5	75.96	2	63.9	3	69.82	7	86.27	0.237969	2.4727	-3.66945	-0.909514	#N/A	0.00477113	8.49515	0.791563	7.431	0	10.7895	4.93875	0.00192696	21.9405	0.495575	-0.066347	-0.12006	0.60831	-0.00413127	0.10249	0.527249	-0.10907	1.60944	0.4	0	0.651092	1.46676	1	2.63906	0.646193	0	0.142379	0.0134577
155	2011	C	0	0	成都市	0.00594157	0	4.25	4	72.79	2	61.07	3	68.83	6	81.44	0.385361	3.69808	-3.706	-0.927969	#N/A	0.00345232	8.48508	0.81701	7.433	0	10.7946	4.50281	0.0021447	21.8579	0.523089	-0.06867	-0.139791	0.612525	0.0517279	0.0940377	0.51252	-0.009351	1.60944	0.4	0	0.648134	1.17141	1	2.70805	0.643611	0	0.151757	0.0810115
155	2013	C	0	0	成都市	0.0178534	0	4.75	5	75.34	3	66.72	3	68.1	6	84.63	0.125548	4.11175	-3.7832	-0.931191	#N/A	0.0214969	8.27817	0.872994	7.998	0.0833	11.2473	4.53181	0.0022615	21.7994	0.74215	-0.231927	-0.64163	0.589844	-0.0401364	0.101943	0.44819	-0.14572	1.60944	0.4	0	0.644262	1.25005	1	2.83321	0.586	0	0.207375	0.0894032
155	2014	C	0	0	成都市	0	0	4.25	4	70.27	2	63.9	2	63.4	5	78.16	0.356289	6.15338	-3.7582	-0.890459	#N/A	0.0434309	7.39326	0.938943	8.291	0.0526	11.1565	4.63143	0.00252163	21.0233	1.64989	-0.761609		0.389479	-0.0441833	0.057464	0.370475	-0.534962	1.60944	0.4	0	0.641065	4.06613	1	2.89037	0.5925	0	0.53183	0.0333267
155	2017	C	1	1	成都市	0.00138797	0	3	3	69.68	1	59.09	2	63	5	79.59	0.45901	1.6786	-3.95521	-1.04368	0.115804	0.00343528	5.23644	1.30917	8.552	0.0426	11.3726	4.52018	0.00383433	22.638	0.458189	0.059959	0.097844	1.02288	-0.00666702	0.00489074	0.382715	2.59144	1.60944	0.4	0	0.50031	1.43306	1	3.04452	0.582863	0	0.0103545	0.0659444
155	2018	C	1	1	成都市	0.00621333	0	3.75	4	73.04	1	55.72	4	74.26	6	81.07	0.395218	0.689632	-3.99366	-0.970636	0.121668	0.0322563	5.35659	1.39614	9.006	0.0361	11.4593	4.43721	0.00476254	22.7014	0.475944	0.058645	0.1101	0.609672	0.0893142	0.0107845	0.424724	-0.343684	1.60944	0.4	0	0.488721	1.07999	1	3.09104	0.530875	0	0.0131218	0.0627131
155	2019	C	1	1	成都市	0.00583713	0	3.75	4	71.26	1	50.77	5	76.11	5	78.46	0.447909	0.297188	-4.0336	-0.977239	0.0846307	0.00226291	5.43372	1.41776	9.06	0.1625	11.5462	4.33341	0.00621706	22.7037	0.417335	0.045518	0.082252	0.283396	0.106119	0.000521986	0.399102	-0.519877	1.60944	0.4	0	0.488721	1.17623	1	3.13549	0.556418	0	0.0345885	0.160872
155	2020	D	0	1	成都市	0.00406245	0	4	4	71.75	1	53.06	5	76.57	5	77.82	0.376562	1.60958	-4.06443	-1.00301	0.0689923	0.00172353	5.52545	1.4532	9.39	0.1857	11.3584	4.6256	0.00618827	22.9462	0.507244	0.035639	0.066954	0.242289	0.0449741	0.0120808	0.517982	-0.026619	1.60944	0.4	0	0.458179	1.64876	1	3.17805	0.488069	0	0.0434555
155	2021	D	0	1	成都市	0.000516025	0	3.5	4	70.28	2	62.18	4	72.46	5	77.94	0.277494	2.38456	-4.05715	-1.05123	0.101852	0.00367054	7.98378	1.4274	9.732	0.1059	11.4576	4.60805	0.0094032	23.5745	0.580014	0.040571	0.096915	0.266137	0.0805619	0.00174019	0.34066	1.20786	1.60944	0.4	0	0.519664	2.57846	1	3.21888	0.560151	0	0.0516387
155	2022	D	0	1	成都市	0.000500586	1	4	4	70.56	2	64.67	4	71.88	5	76.27	0.089566	1.48621	-4.08522	-1.02674	0.17136	0.00361195	7.92008	1.45951	10.087	0.1429	11.4942	4.98359	0.00729435	23.6859	0.546268	0.068105	0.159223	0.201589	0.14857	0.00381432	0.329169	-0.137609	1.60944	0.4	0	0.52317	1.79713	1	3.2581	0.573983	0	0.0720184	0.031559
155	2023	D	0	1	成都市	0.000482671	1	4.75	5	75.57	5	77.42	6	80.62	4	70.88	0.204714	1.85291	-4.11143	-1.03769	0.147379	0.00349983	7.61283	1.53799	10.455	0.127	11.547	5.28049	0.00683689	23.8038	0.538182	0.062815	0.137146	0.161142	0.0706439	0.00771772	0.31416	-0.128492	1.60944	0.4	0	0.517348	1.38591	1	3.29584	0.536977	0	0.0850059	0.0273401
156	2012	R	0	0	杭州市	0.981156	0	3	3	68.81	2	61.21	1	57.69	6	83.17	0.17728	2.42847	-3.86952	-0.976624	0.256928	0.00134384	8.24328	0.923155	9.86	0.102	11.396	4.71875	0.00515096	21.9422	0.74873	0.053727	0.224385	0.466391	0.201368	0.0111492	0.42001	0.453838	2.56495	0.3077	1	0.891583	1.18244	1	2.94444	0.9379	0	0.12775	0.0379438
156	2013	R	0	0	杭州市	0.986372	0	3.5	4	73.94	2	61.21	5	79.16	4	74.83	0.184864	-0.007484	-3.9179	-0.989524	0.163943	0.0225775	8.38275	0.960928	10.053	0.0936	11.6786	4.81195	0.00554442	22.3495	0.643314	0.059707	0.188199	0.421002	0.171649	0.0100935	0.412349	0.19394	2.48491	0.3333	1	0.806811	1.26244	1	2.99573	0.905777	0	0.124792	0.0462904
156	2014	R	0	0	杭州市	0.980613	0	4	4	71.19	1	49.2	5	76.78	5	76.08	0.416785	-0.172867	-3.95784	-0.989763	0.210548	0.00666468	8.45084	0.955848	10.335	0.1059	11.5503	4.81267	0.00569273	22.4385	0.602917	0.072137	0.190949	0.453196	0.242088	0.00823586	0.398088	0.338905	2.48491	0.3333	1	0.806811	1.48699	1	3.04452	0.929866		0.115035	0.0171419
156	2015	R	0	0	杭州市	1	0	4.5	5	76.45	1	56.38	4	73.39	7	88.83	0.232899	-6.41926	-3.96484	-1.07095	0.0545146	0.00303947	8.46779	1.02539	10.492	0.1118	11.6283	5.11416	0.00697986	23.2629	0.269583	0.058418	0.092904	0.313557	0.0952103	0.00343554	0.182802	0.185335	2.56495	0.3846	0	0.789132	2.13649	1	3.09104	0.858703	0	0.11748	0.0092934
156	2016	R	0	1	杭州市	0.937823	0	5.75	6	80.23	1	57.41	6	81.87	7	89.33	0.168897	-2.55999	-3.99671	-1.06796	0.0395458	0.00326024	8.50755	1.10297	10.43	0.1135	11.7303	5.1247	0.00662196	23.3647	0.279278	0.044976	0.062009	0.230733	0.105844	0.00486501	0.175606	0.077875	2.48491	0.4167	0	0.757774	1.76854	1	3.13549	0.821756	0	0.117513	0.0085311
156	2017	R	0	1	杭州市	0.787666	0	5.25	5	78.99	3	67.43	4	72.54	8	90.67	0.228961	-1.11351	-4.03439	0	0.0331348	0.00281217	8.50451	1.17102	10.56	0.1153	11.8139	5.06973	0.00732532	23.3919	0.280398	0.04507	0.062584	0.225586	0.0876259	0.0050662	0.184356	0.041583	2.30259	0.4	0	0.709029	1.28667	1	3.17805	0.791221	0	0.129104	0.0152319
156	2018	R	0	1	杭州市	0.746912	0	5.75	6	81.83	6	82.43	4	73.12	8	90	0.147569	-1.60498	-4.07246	0	0.029491	0.00437224	8.50086	1.21379	10.802	0.1165	11.8507	5.52867	0.00875029	23.4139	0.277813	0.044181	0.061285	0.235653	0.0810591	0.00474645	0.192652	0.070634	2.30259	0.4	0	0.699064	1.04367	1	3.21888	0.760139	0	0.0838243	0.0273782
156	2019	R	0	1	杭州市	0.719508	0	6	6	80.85	4	72.38	5	75.51	8	90	0.086501	-3.52674	-4.10658	0	-0.0263304	0.0028894	8.51679	1.29568	10.827	0.122	11.9347	5.52147	0.00963949	23.4784	0.300245	0.042379	0.059638	0.243604	0.104448	0.00355353	0.193864	0.079939	2.48491	0.3333	0	0.695668	1.22504	1	3.2581	0.735748	0	0.0817659	0.0177937
156	2020	R	0	1	杭州市	0.772471	0	6.5	7	85.5	6	82.43	5	76.52	9	95.67	0.108498	0.047137	-4.10218	0	0.0465905	0.00620809	9.46839	1.37175	11.137	0.1182	11.8249	6.27578	0.00896097	23.8777	0.40751	0.039787	0.064642	0.316785	0.0819972	0.0465146	0.342851	1.04213	2.48491	0.3333	0	0.563443	1.05815	1	3.29584	0.627265	0	0.103394	0.0091268
156	2021	R	0	1	杭州市	0.767187	0	5.5	5	79.1	2	61.33	5	77.21	6	82.98	0.110201	-0.69055	-4.13053	-1.10721	0.0382583	0.00903765	9.3974	1.30413	11.456	0.1178	11.9174	6.29912	0.00992179	23.9659	0.433444	0.037795	0.065282	0.345982	0.109625	0.0501884	0.335073	0.119564	2.48491	0.3333	0	0.563369	1.03162	1	3.3322	0.615529	0	0.0961902	0.0126328
156	2022	R	0	1	杭州市	0.759898	0	5	5	77.46	2	61.33	4	74.59	6	81.92	0.073732	0.829906	-4.1626	-1.13073	0.0257931	0.00560626	9.4141	1.30108	11.784	0.114	11.9355	6.8868	0.0110774	24.0232	0.448888	0.030628	0.054829	0.356131	0.0566622	0.049741	0.332005	0.106368	2.48491	0.3333	0	0.564471	0.966894	1	3.3673	0.627578	0	0.0953543	0.0133986
156	2023	R	0	1	杭州市	0.780232	0	5	5	78.14	4	71	5	78.36	5	78.89	0.132661	1.1169	-4.1915	-1.05752	0.0485166	0.00640327	9.3879	1.36274	12.121	0.1141	11.99	7.17449	0.0121096	24.1002	0.480612	0.024957	0.046681	0.34427	0.0671372	0.0430667	0.320666	0.03418	2.48491	0.3333	0	0.548741	0.95524	1	3.4012	0.61472	0	0.0931994
157	2009	C	0	0	长沙市	0.0258627	0	5	5	77.36	3	69.03	3	69.09	7	87.19	0.111566	3.19975	-3.4089	-1.14558	0.3578	0.0103542	9.82612	0.997758	6.869	0.0948	10.9441	2.81102	0.00287911	24.2471	0.776151	0.084817	0.373988	0.72803	0.0393135	0.184927	0.0926944	0.5324	1.94591	0.5714	1	0.499087	1.52042	0	2.3979	0.759896	0.0428	0.0401685
157	2010	C	0	0	长沙市	0.0257862	0	5	5	76.46	2	64.3	3	69.78	7	87.19	0.031559	-3.18219	-3.33327	-1.12341	0.0825538	0.00837898	10.0149	0.919219	7.159	0.0908	11.1041	2.81097	0.00293102	24.8663	0.563865	0.094685	0.261674	0.664384	0.00865427	0.137759	0.0580656	0.550545	1.94591	0.5714	1	0.4802	1.62394	0	2.48491	0.622378	0.033	0.0415793	0.0120765
157	2011	C	0	0	长沙市	0.0410596	0	5	5	76.94	3	67.24	3	69.09	7	87.19	0.08537	1.56787	-3.3453	-1.15402	0.212565	0.0114521	10.2693	0.85679	7.016	0.0807	11.2839	2.64233	0.00274503	24.9941	0.502181	0.121389	0.259022	0.687976	0.0292426	0.134886	0.0572991	0.438917	1.94591	0.5714	1	0.48019	1.2687	0	2.56495	0.6356	0.0323	0.0379055	0.0101558
157	2012	C	0	0	长沙市	0.0616524	0	4.25	4	74.42	1	56.43	3	69.09	7	87.19	0.050409	1.57443	-3.33447	-1.17049	0.170101	0.0126363	10.3643	0.877709	6.924	0.0878	11.4065	2.65607	0.00261657	25.2116	0.53707	0.093786	0.196006	0.598808	0.0332712	0.131864	0.0513559	0.037748	1.94591	0.5714	1	0.466422	1.27254	0	2.63906	0.654376	0.0317	0.0402668	0.0074428
157	2013	C	0	0	长沙市	0.0709832	0	4.75	5	76.65	2	60.02	4	73.62	7	87.19	0.073756	1.23635	-3.37293	-1.15012	0.0712253	0.00640264	10.2046	0.920143	7.417	0.0982	11.5889	2.71507	0.00282735	25.2179	0.530345	0.044276	0.094951	0.431813	0.00822865	0.0976935	0.0600516	-0.198235	1.94591	0.5714	1	0.467196	0.999509	0	2.70805	0.583525	0.2498	0.0506839	0.0200875
157	2014	C	1	0	长沙市	0	0	5	5	75.9	3	65.66	3	66.92	7	87.19	0.07297	2.66172	-3.40162	-1.1409	0.00591574	0.00988137	9.91907	0.962794	8.132	0.119	11.5869	2.74217	0.00286997	25.264	0.56006	0.006851	0.015075	0.282072	-0.0820211	0.11067	0.064707	-0.329268	1.94591	0.5714	1	0.441835	1.11401	0	2.77259	0.553274	0.2428	0.074651	0.0196073
157	2015	C	1	0	长沙市	0	0	4.5	4	74.15	3	67.24	2	60.04	7	87.19	0.040007	1.90095	-3.44171	-1.15737	-0.023669	0.0150455	9.85959	1.03626	8.724	0.1101	11.6565	3.09007	0.00284051	25.2636	0.566712	0.000972	0.002227	0.221391	-0.0355782	0.150261	0.0832243	-0.1972	1.79176	0.5	1	0.44683	1.00344	0	2.83321	0.532835	0.1802	0.0819574	0.0162497
157	2016	C	1	1	长沙市	0	0	4.5	4	74.5	3	67.24	2	62.39	7	86.37	0.039288	1.75886	-3.49401	-1.14905	#N/A	0.0132718	9.62602	1.1587	8.18	0.1388	11.729	3.12855	0.00263027	25.2135	0.576009	-0.009896	-0.023081	0.218988	0.0243273	0.143257	0.0835859	-0.035215	1.94591	0.5714	1	0.446817	0.972495	0	2.89037	0.550298	0.1963	0.0866019	0.0145362
157	2017	C	1	1	长沙市	0	0	4.75	5	75.68	3	67.94	3	69.2	6	83.99	0.040964	1.2912	-3.55073	-1.14755	-0.00806549	0.0159489	9.50755	1.2905	8.447	0.1315	11.7845	3.24062	0.00287185	25.1439	0.540256	0.014487	0.032832	0.270159	0.0342889	0.106866	0.0706089	0.162336	1.94591	0.5714	1	0.439388	0.967453	0	2.94444	0.524974	0.5897	0.0760012	0.0030575
157	2018	C	1	1	长沙市	0	0	4.25	4	72.3	1	58.92	4	70.06	6	80.63	0.019096	-0.085387	-3.56242	-1.16555	0.000115993	0.00841305	9.62384	1.39106	8.683	0.1198	11.8272	3.36209	0.00328872	25.2608	0.585172	0.022158	0.050824	0.324979	0.0541868	0.102193	0.0581952	0.233046	1.94591	0.5714	1	0.438889	0.905477	0	2.99573	0.535375	0.429	0.0508517	0.0100598
157	2019	C	1	1	长沙市	0	0	4.75	5	77.77	2	60.71	6	82.12	6	83.55	0.04764	2.08065	-3.60611	-1.12368	0.121253	0.0116931	9.85304	1.35344	8.75	0.1308	11.8485	3.61858	0.00425503	25.2458	0.570609	0.046087	0.109196	0.466864	0.0675517	0.127857	0.0630249	0.50915	1.94591	0.5714	1	0.513005	1.11422	0	3.04452	0.654302	0.4161	0.0373978	0.0084991
157	2020	C	1	1	长沙市	0	0	5	5	78.57	2	62.5	6	82.12	6	84.37	0.02957	0.257852	-3.58634	-1.19069	0.07037	0.00879462	10.0659	1.33879	9.037	0.1179	11.7224	3.87937	0.00456643	25.4792	0.588158	0.070607	0.168273	0.625017	0.0638293	0.126015	0.0525411	0.503414	1.94591	0.5714	1	0.549769	1.21669	0	3.09104	0.661569	0.5026	0.0300295	0.0078479
157	2021	C	1	1	长沙市	0	0	5	5	77.71	4	72.26	6	81.53	5	79.55	0.039673	1.1979	-3.61341	-1.15835	0.0659934	0.0101934	10.1672	1.31847	9.333	0.1216	11.781	3.91073	0.00518373	25.5274	0.522225	0.053598	0.120282	0.563429	0.0215109	0.110651	0.0555044	0.031051	1.94591	0.5714	1	0.478759	1.02619	0	3.13549	0.574045	0.4195	0.0249288	0.0143422
157	2022	C	1	1	长沙市	0	0	5	5	78.09	5	75.39	5	78.15	6	80.16	0.017078	1.82312	-3.65003	-1.16261	-0.00683871	0.00554369	10.1379	1.39987	9.638	0.1164	11.8145	4.09933	0.00569442	25.5399	0.53886	0.019421	0.041374	0.339058	0.0196242	0.114952	0.0843238	-0.379843	1.94591	0.5714	1	0.476793	0.935609	0	3.17805	0.558247	0.4195	0.0378109	0.0166574
157	2023	C	1	1	长沙市	0	0	5.5	6	81.88	5	75.92	7	85.93	6	83.96	0.05058	2.82441	-3.67429	-1.12385	0.0680719	0.00538552	10.3275	1.41152	9.954	0.1242	11.8272	4.41626	0.00587284	25.5974	0.547868	0.029644	0.064936	0.370063	0.0207283	0.171964	0.0835647	0.130751	1.94591	0.5714	1	0.499103	0.984435	0	3.21888	0.650748	0.3921	0.0404368
158	2009	C	0	0	石家庄市	0	0	3.25	3	67.3	1	52.87	1	53.04	6	84.28	0.386541	3.27393	-3.59606	-0.96289	0.0333036	0.00391392	9.7606	0.840363	6.939	0.1441	10.3231	2.68206	0.00129052	22.1753	0.455476	0.017381	0.032792	0.717781	0.00579496	0.141454	0.281193	0.030546	2.19722	0.3333	0	0.513477	2.02392	1	2.48491	0.516807		0.0320446
158	2010	C	0	0	石家庄市	0	0	3	3	67.95	1	51.08	1	57.74	6	83.46	0.364862	1.43497	-3.63748	-1.00496	0.0173613	0.00598019	9.7954	0.833481	6.459	0.1205	10.4316	2.76032	0.00132375	22.2798	0.49943	0.012178	0.023357	0.821137	0.00906601	0.160424	0.312063	0.195387	2.19722	0.3333	0	0.508635	1.51051	1	2.56495	0.505752		0.0370757	0.0621431
158	2011	C	0	0	石家庄市	0.000941566	0	3	3	68.72	1	52.87	2	60.1	6	82.64	0.317521	4.2167	-3.67796	-0.959652	0.0242562	0.0108865	9.72562	0.818101	6.406	0.1736	10.5946	2.54125	0.00154812	22.3893	0.543603	0.0114	0.023885	0.937849	-0.0339689	0.189732	0.283067	0.271313	2.19722	0.3333	0	0.49453	1.08569	1	2.63906	0.49124		0.0277385	0.0894534
158	2012	C	0	0	石家庄市	0.000446021	0	3	3	68.45	1	51.08	2	60.55	6	82.64	0.392731	4.00734	-3.71767	-0.972661	0.00484383	0.0103242	9.47593	0.846525	6.622	0.1711	10.6817	2.58562	0.00166788	22.4667	0.575353	0.002126	0.004832	0.912522	-0.0211956	0.202133	0.291629	0.067511	2.19722	0.3333	0	0.499016	1.00162	1	2.70805	0.497756	0.0001	0.034855	0.0709304
158	2013	C	0	0	石家庄市	0.000218222	0	3.5	3	69.99	1	55.82	2	63.17	6	81.82	0.347859	3.23514	-3.7576	-0.982833	0.00723456	0.00461564	9.07886	0.889152	6.859	0.1367	10.7891	2.69752	0.00164619	22.4765	0.576942	0.003054	0.007204	1.01955	-0.00954192	0.260756	0.260003	0.166228	2.19722	0.3333	0	0.504712	1.09244	1	2.77259	0.4953	0.0001	0.0481907	0.0230772
158	2014	C	0	0	石家庄市	0	0	3	3	67.98	1	52.45	1	58.01	6	82.64	0.381836	2.95291	-3.79784	-0.98716	0.00990567	0.0135977	8.67009	0.920745	6.969	0.1434	10.799	2.75103	0.00141014	22.4376	0.554528	0.004284	0.009871	1.15986	0.0215005	0.256299	0.209357	0.121406	2.19722	0.3333	0	0.510401	1.79596	1	2.83321	0.533696	0.0003	0.0325909	0.0240553
158	2015	C	1	0	石家庄市	0.248742	0	3	3	66.99	1	54.24	1	59.25	5	78.72	0.240962	2.36886	-3.81501	-1.08024	0.0377974	0.0162438	8.6625	1.02247	7.592	0.1457	10.8404	2.74313	0.00166309	23.1159	0.503495	0.030157	0.062916	1.07935	-0.0446998	0.18154	0.118979	0.355242	2.3979	0.3636	0	0.5499	2.05624	1	2.89037	0.655846	2.3185	0.0331309	0.0310603
158	2016	C	1	1	石家庄市	0.232582	0	3.75	4	70.52	1	54.03	4	70.84	5	78.72	0.219541	1.44515	-3.84407	-1.08252	0.0494618	0.0169067	8.68457	1.05895	7.201	0.1524	10.9183	2.74199	0.00206318	23.273	0.551411	0.029225	0.062094	0.924307	0.0340964	0.151107	0.106188	0.232802	2.3979	0.3636	0	0.5499	1.47741	1	2.94444	0.61779	2.3174	0.0267088	0.0237438
158	2017	C	1	1	石家庄市	0.214343	0	3	3	69.45	1	52.56	5	75.77	4	73.8	0.242487	2.18463	-3.88416	-1.0663	0.0474532	0.0158272	8.52794	1.15298	7.637	0.1326	10.9512	3.33946	0.00162878	23.2719	0.52987	0.027744	0.060399	0.879482	0.0299305	0.148766	0.1258	0.025527	2.3979	0.3636	0	0.552934	1.34145	1	2.99573	0.616775	2.3142	0.0300602	0.0251905
158	2018	C	1	1	石家庄市	0.418901	0	4	4	71.05	3	67.23	4	73.01	4	71.67	0.160283	1.76618	-3.91605	-1.0132	0.0309561	0.0125717	8.53543	1.25945	8.104	0.1269	10.9281	3.83391	0.00195179	23.3725	0.569219	0.013585	0.030225	0.717074	0.0613537	0.155858	0.157533	-0.14202	2.3979	0.3636	0	0.562666	1.17617	1	3.04452	0.624306	2.5869	0.0303225	0.0260589
158	2019	I	1	1	石家庄市	0.543223	0	3.75	4	73.29	5	75.4	6	81.96	3	68.37	0.257377	2.82275	-3.95597	-1.01688	0.0163445	0.0165381	8.53385	1.34887	8.493	0.1527	10.8754	4.52644	0.00212346	23.3734	0.581776	0.006729	0.015851	0.667625	0.0212356	0.154421	0.172303	-0.021695	2.3979	0.3636	0	0.499355	1.34561	1	3.09104	0.51963	2.0962	0.0309536	0.0246525
158	2020	I	1	1	石家庄市	0.479367	0	4.5	5	75.93	5	77.08	5	77.31	4	74.74	0.237112	1.99273	-3.99154	-1.0351	0.0180609	0.00965075	8.51859	1.33442	8.717	0.1679	10.8773	4.98122	0.00257476	23.4243	0.594665	0.007374	0.017914	0.680425	0.0676033	0.162266	0.167726	0.046278	2.3979	0.3636	0	0.458597	1.25598	1	3.13549	0.487966	1.7995	0.0290834	0.0237752
158	2021	I	1	1	石家庄市	0.481119	0	4.25	4	72.62	2	60.97	4	74.19	5	79.7	0.243771	2.75344	-4.02136	-0.909978	0.0214713	0.021573	8.5307	1.22347	8.946	0.1585	10.9653	4.99058	0.00236732	23.5325	0.628158	0.008238	0.02125	0.691044	0.0276362	0.181365	0.149354	0.100954	2.3979	0.3636	0	0.430046	1.29068	1	3.17805	0.431333	1.5313	0.0306091	0.0496952
158	2022	I	1	1	石家庄市	0.512399	0	4	4	72.43	2	60.97	5	75.87	5	78.02	0.113644	3.54548	-4.06161	-1.02258	#N/A	0.0177161	8.42792	1.32984	9.182	0.1767	11.0559	5.17345	0.00302081	23.5301	0.641041	-0.014026	-0.038385	0.582936	0.0116236	0.177499	0.1168	-0.111944	2.3979	0.3636	0	0.432002	1.18168	1	3.21888	0.429978	1.1952	0.0338405	0.0502328
158	2023	I	1	1	石家庄市	0.550089	1	3.75	3	69.64	2	60.97	3	67.78	5	77.11	0.205417	2.84292	-4.09744	-1.0337	#N/A	0.022121	8.27001	1.40202	9.423	0.1662	11.1139	5.47	0.00338472	23.5716	0.662899	-0.007532	-0.021666	0.532548	0.0635974	0.164547	0.0923875	-0.067913	2.3979	0.3636	0	0.374955	1.45716	1	3.2581	0.371822	0.8947	0.0352669
159	2009	C	0	0	乌鲁木齐市	0.0017855	0	4.25	4	72.84	1	59.31	5	75.58	5	77.72	0.621484	1.58323	-3.52846	-0.989868	0.0267469	0.0040242	7.56579	0.91338	4.741	0.0714	10.5583	4.16809	0.00238305	21.5571	0.493682	0.072678	0.13852	0.249665	-0.0558506	0.288592	0.221747	-0.328418	2.19722	0.3333	0	0.437591	2.45519	0	2.3979	0.456669	0	0.0954893
159	2010	C	0	0	乌鲁木齐市	0.000919589	0	3.5	4	71.65	1	59.31	5	75.58	5	75.64	0.912847	1.49647	-3.58784	-0.991015	0.384473	0.277407	6.28413	0.758166	3.772	0.0625	10.6699	4.23691	0.00160603	21.9003	0.467699	0.234303	0.449272	0.269328	0.0111135	0.216099	0.0873008	0.443323	2.19722	0.3333	0	0.348118	2.7128	0	2.48491	0.342519	0	0.121075	0.0582775
159	2011	C	0	0	乌鲁木齐市	0.000503549	0	2.5	2	62.53	1	47.67	5	75.58	2	64.6	0.554022	2.4949	-3.62695	-1.01106	0.183103	0.0254007	6.38182	0.773065	3.538	0.1333	10.8714	3.92565	0.0017518	21.8792	0.362134	0.103675	0.177365	0.385508	0.0124856	0.278091	0.095991	0.657166	2.19722	0.3333	0	0.321671	1.59185	0	2.56495	0.325861	0	0.055818	0.0645374
159	2012	F	0	0	乌鲁木齐市	0.00268667	0	3.5	4	71.8	1	49.66	9	100	4	72.01	0.638471	0.936996	-3.6641	-1.01586	0.0153443	0.0179588	6.35089	0.866502	3.359	0.0625	10.9962	4.02403	0.00231104	21.8175	0.302494	0.032852	0.049271	0.454347	0.0271989	0.273408	0.0975684	0.131294	2.19722	0.3333	0	0.315813	1.33822	0	2.63906	0.32178	0	0.0384398	0.0247482
159	2013	F	0	0	乌鲁木齐市	0.00179178	0	4	4	70.56	1	47.67	7	85.35	5	75.48	0.650393	0.283324	-3.70403	-1.00216	0.00535032	0.0143671	6.38519	1.03055	3.58	0.0909	11.3357	4.33541	0.00310002	21.8162	0.30427	0.011759	0.016881	0.357949	0.0182446	0.222721	0.0853506	-0.236969	2.19722	0.3333	0	0.31719	1.47365	0	2.70805	0.307407	0	0.0585684	0.0238006
159	2014	F	0	0	乌鲁木齐市	0	0	4.5	4	72.96	1	55.43	8	90.23	4	74.79	0.724544	-0.479232	-3.74379	-1.02951	0.0498723	0.0158558	6.50877	1.05202	4.076	0.0909	11.1623	4.36174	0.0034401	21.8112	0.264477	0.044555	0.062264	0.395413	0.0509172	0.234217	0.0817213	0.101195	2.19722	0.3333	0	0.323329	1.91298	0	2.77259	0.324472	0	0.0776083	0.0270546
159	2015	F	0	0	乌鲁木齐市	0	0	4.25	4	74.94	1	47.58	9	100	5	78.41	0.744687	0.546527	-3.78347	-0.984944	0.0145129	0.00410617	6.41999	1.29166	4.862	0.1569	11.2164	4.53787	0.00334844	21.8047	0.260288	0.020305	0.027528	0.229748	-0.0561197	0.284923	0.078644	-0.422287	2.19722	0.3333	0	0.315608	1.77762	0	2.83321	0.321862	0.0421	0.127521	0.0156017
159	2016	F	0	1	乌鲁木齐市	0	0	4.25	4	72.35	1	53.54	6	80.46	5	77.72	0.73184	0.395216	-3.82609	-0.999045	0.00318468	0.00340547	6.27099	1.36723	4.448	0.1	11.1543	5.16223	0.00385006	21.8599	0.292732	0.011826	0.016357	0.172525	-0.0107901	0.287995	0.1286	-0.230288	2.19722	0.3333	0	0.321296	1.60511	0	2.89037	0.327666	0.0159	0.147685	0.0242911
159	2017	F	0	1	乌鲁木齐市	0	0	4	4	70.63	1	50.23	5	75.58	5	77.72	0.661224	0.706993	-3.86491	-0.974524	#N/A	0.0195201	5.99146	1.34561	5.293	0	11.2613	5.33079	0.00366302	21.8344	0.310459	-0.023117	-0.033094	0.115436	-0.00973191	0.272957	0.118552	-0.321095	2.19722	0.3333	1	0.31066	1.14513	0	2.94444	0.301341	0.0097	0.192089	0.0232475
159	2018	F	0	1	乌鲁木齐市	0	0	3.5	3	69.43	1	57.8	5	75.58	4	72.39	0.619876	0.433823	-3.89957	-1.02622	0.0168084	0.0396356	5.75257	1.38714	5.32	0.2209	11.3759	4.97131	0.00329986	21.7312	0.218467	0.01725	0.023528	0.190589	-0.00333741	0.269602	0.12664	0.550106	2.19722	0.3333	1	0.310119	0.959474	0	2.99573	0.311464	0.0097	0.153232	0.014811
159	2019	F	0	1	乌鲁木齐市	0	0	3.25	3	69.66	1	55.81	5	75.58	4	73.63	0.674737	1.21034	-3.94109	-1.00011	0.00758677	0.034744	5.68698	1.46955	5.448	0.0926	11.4796	4.88077	0.00295423	21.759	0.224618	0.009379	0.012049	0.154898	-0.0335117	0.258724	0.118756	-0.218325	2.19722	0.3333	1	0.280915	1.19552	0	3.04452	0.2493	0.0097	0.146006	0.0284619
159	2020	F	0	1	乌鲁木齐市	0	0	4.25	4	73.92	1	59.79	6	80.46	5	77.81	0.763468	1.54504	-3.97829	-1.0188	0.0355823	0.00431297	5.55296	1.46924	5.784	0.0737	11.3183	5.47695	0.00291726	21.7089	0.181153	0.030929	0.038827	0.200738	-0.0173891	0.261816	0.10081	0.281788	2.19722	0.3333	1	0.256129	1.09969	0	3.09104	0.236875	0.0097	0.15792	0.0273858
159	2021	F	0	1	乌鲁木齐市	0	0	4	4	73.67	2	62.07	5	77.59	6	82.28	0.624457	2.38552	-4.03249	-0.985528	0.0112974	0.05114	6.30445	1.21612	6.141	0.1068	11.4163	5.4384	0.00256238	22.0286	0.386334	0.007942	0.011346	0.351472	0.00290775	0.2003	0.088915	1.02866	2.19722	0.3333	1	0.251586	1.2372	0	3.13549	0.240402	0.0097	0.0625647	0.016031
159	2022	F	0	1	乌鲁木齐市	0	0	3.75	4	70.43	2	62.07	4	72.05	5	77.39	0.806627	2.70237	-4.06552	-0.965394	0.136869	0.00253859	6.44889	1.07611	6.521	0.1404	11.4675	5.7976	0.000847881	21.8474	0.151369	0.092935	0.128981	0.476287	-0.105978	0.260667	0.101008	0.439843	2.07944	0.375	0	0.321766	1.23846	0	3.17805	0.284908	0.0047	0.0462411	0.0156985
159	2023	F	0	1	乌鲁木齐市	0	0	3	3	65.98	2	60.74	4	73.24	3	66.47	0.705821	2.62648	-4.11269	-1.02976	0.0341936	0.00328206	6.2804	1.12492	6.923	0.0833	11.5335	5.92611	0.000745369	22.0351	0.342602	0.023731	0.031941	1.32747	-0.011317	0.204644	0.111867	1.80155	1.94591	0.4286	0	0.310425	1.18279	0	3.21888	0.232101	0.002	0.0194886
301	2009	C	0	0	苏州市	0	0	4.25	5	75.49	2	62.12	3	68.34	7	86.13	0.398869	3.15093	-3.59389	-0.958844	0.0379285	0.000589584	6.40026	0.731813	9.242	0.0924	11.7164	2.51358	0.00371709	22.0777	0.359717	0.023583	0.036652	0.193348	0.0514714	0.151711	0.0956305	-0.085466	2.07944	0.25	0	0.407756	2.56072	0	2.48491	0.466175	0	0.0936946
301	2010	S	0	0	苏州市	0	0	4.75	5	76.27	1	58.4	4	73.07	7	86.7	0.288992	0.803018	-3.63292	-0.978238	-0.00534787	0.00110384	6.42811	0.783441	10.261	0.0882	11.4408	2.5684	0.00386942	22.043	0.319968	0.018798	0.02849	0.240675	-0.00481214	0.146203	0.0894224	0.233287	1.94591	0.5714	0	0.401712	1.98008	0	2.56495	0.428189	0	0.0819003	0.0110239
301	2011	S	0	0	苏州市	0	0	5.75	6	80.54	2	60.19	6	82.76	7	88.95	0.592112	1.74856	-3.67058	-0.960733	0.0439724	0.00190007	6.43775	0.820381	10.428	0.0971	11.534	2.52447	0.00500187	21.971	0.265155	0.029838	0.042237	0.296916	0.0849705	0.152237	0.0797174	0.17021	2.19722	0.4444	0	0.389399	1.26211	0	2.63906	0.404118	0	0.0609683	0.0137925
301	2012	D	0	0	苏州市	0	0	5.25	5	77	1	55.5	6	82.76	6	83.86	0.574213	-0.345008	-3.71156	-1.02279	0.0283642	0.00086198	6.43775	0.858531	10.597	0.1263	11.6442	2.605	0.00554377	21.9994	0.247966	0.045176	0.060756	0.24778	0.136162	0.141071	0.0735977	-0.183939	2.19722	0.4444	0	0.388652	1.29864	0	2.70805	0.407486	0	0.0883339	0.0105541
301	2013	D	0	0	苏州市	0	0	5	5	77.13	1	55.5	5	78.71	7	86.53	0.69177	-0.23925	-3.7523	-1.02877	0.100097	0.0865559	6.39693	0.917771	10.76	0.092	11.735	2.73	0.00586731	22.0226	0.191626	0.091209	0.116856	0.283331	0.0440524	0.0831596	0.0693595	0.17328	2.07944	0.375	0	0.383435	1.26145	0	2.77259	0.378653	0	0.0989972	0.0104854
301	2014	D	0	0	苏州市	0	0	5	5	78.84	1	57.69	5	79.87	7	88.33	0.631654	0.872922	-3.79461	-1.02024	0.0552717	0.0568274	6.41836	0.971832	10.733	0.1059	11.7747	2.81058	0.00550828	22.1063	0.215455	0.058728	0.073783	0.205258	-0.0313402	0.136816	0.0593536	-0.235171	1.94591	0.4286	1	0.379133	1.77687	0	2.83321	0.376301	0	0.102365	0.0163896
301	2015	D	0	0	苏州市	0.00090042	0	4.25	4	74.39	1	54.54	4	73.68	6	84.3	0.617926	0.06878	-3.83659	-1.03386	0.0337665	0.0231229	6.44095	1.01678	10.578	0.1097	11.8256	2.95498	0.00609001	22.2066	0.264025	0.039757	0.052377	0.165319	0.0503356	0.116576	0.0591537	-0.116615	1.94591	0.4286	1	0.388351	2.04125	0	2.89037	0.390097	0	0.109866	0.0149154
301	2016	D	0	1	苏州市	0.00257796	0	4.75	5	79.84	2	64.09	6	82.76	7	85.64	0.542992	-0.713653	-3.87781	-1.0621	0.0255278	0.001256	6.48464	1.09212	9.639	0.0908	11.8883	3.0881	0.00615182	22.3262	0.302185	0.031402	0.043873	0.169191	0.172226	0.11064	0.127284	0.143005	1.94591	0.4286	1	0.385178	1.61416	0	2.94444	0.38719	0	0.125508	0.0030076
301	2017	D	0	1	苏州市	0.0152097	0	5	5	79.62	1	57.86	6	83.99	7	87.43	0.614829	-0.674732	-3.91661	-1.0409	0.0304823	0.000820408	6.35089	1.09141	9.656	0.105	11.979	2.91314	0.00716114	22.2083	0.186972	0.048601	0.064626	0.237027	0.108376	0.135277	0.0869842	0.402105	1.79176	0.5	1	0.383381	1.65206	0	2.99573	0.380072	0	0.0862795	0.0112752
301	2018	C	1	1	苏州市	0.0293062	0	3.75	3	66.29	1	53.76	3	68.52	4	70.95	0.072526	-0.693171	-3.87088	-1.64212	0.0113062	0.001461	9.48174	1.1141	9.746	0.1008	12.0655	2.96313	0.00818809	23.8083	0.407513	0.047875	0.086577	1.04278	0.0634654	0.140932	0.384662	15.5826	1.94591	0.4286	1	0.81356	1.12501	0	3.04452	0.821483	0	0.00756254
301	2019	C	1	1	苏州市	0.0137576	0	3	3	69.2	1	51.71	4	71.31	5	76.7	0.06939	-0.426485	-3.84362	-1.14611	0.0632689	0.00307037	9.67602	1.16881	11.494	0.0993	12.0961	3.21111	0.00943959	24.2798	0.563384	0.049856	0.104024	0.769647	0.148824	0.0815732	0.381094	0.349646	1.94591	0.4286	1	0.814173	1.04806	0	3.09104	0.824504	0	0.0102985
301	2020	C	1	1	苏州市	0.00885851	0	3.75	4	74.98	1	52.93	4	74.25	7	86.72	0.034587	0.579213	-3.77348	-1.13958	-0.0204011	0.000599963	9.83076	1.20182	11.934	0.102	11.9733	3.43884	0.0107228	24.8653	0.64172	0.006384	0.016526	0.464951	0.0327542	0.0433576	0.218857	-0.084811	1.94591	0.4286	1	0.759428	1.0903	0	3.13549	0.870544	0	0.0113929	0.028784
301	2021	C	1	1	苏州市	0.0119865	0	4	4	71.47	2	61.77	4	74.47	6	80.75	0.027246	2.7424	-3.63189	-1.19356	0.145975	0.000703211	10.1047	1.13884	12.39	0.1056	12.0868	3.43912	0.0104265	25.6061	0.777216	0.04724	0.170809	0.480388	0.0404061	0.0461051	0.236258	1.27081	1.94591	0.4286	1	0.758387	1.17394	0	3.17805	0.862642	0	0.0124175	0.047233
301	2022	C	1	1	苏州市	0.0131603	0	4	4	72.31	2	62.32	4	74.42	6	82.51	0.00267	4.50775	-3.60525	-1.18416	-0.0115534	0.0049223	10.2198	1.13397	12.864	0.1029	12.1336	3.74605	0.00964467	25.8383	0.785613	0.003635	0.016661	0.427533	0.00835231	0.105296	0.239947	0.233945	1.94591	0.4286	1	0.707143	1.24012	0	3.21888	0.810219	0	0.0102187	0.022496
301	2023	C	1	1	苏州市	0.0185512	0	4.75	5	79.6	5	75.69	6	80.75	6	83.38	0.014421	4.31578	-3.60496	-1.24302	-0.00696024	0.00377339	10.3386	1.16389	13.356	0.105	12.158	4.1394	0.0109464	25.9714	0.813411	0.00394	0.0198	0.778075	0.0438606	0.0957243	0.648887	1.20048	1.94591	0.4286	1	0.688998	1.12229	0	3.2581	0.771849	0.0539	0.00615502	0.0080488
333	2013	C	0	0	佛山市	0	0	3	3	66.29	1	53	1	54.28	6	81.18	#N/A	#N/A	-3.3133	0	0.144189	0.010577	11.5999	1.03207	10.237	0.0194	11.3759	2.6388	0.00233514	25.2974	0.596883	0.089857	0.229701	1.31009	0.103709	0.156765	0.201887		2.63906	0.3571	1	0.484782	1.1899	0	2.63906	0.692985	7.7092	0.0556599	0.0171302
333	2014	C	0	0	佛山市	0	0	4.5	5	78.97	3	67.11	5	79.37	6	84.76	0.027479	-1.58256	-3.29725	-1.20136	0.194005	0.00981584	11.591	1.03989	10.445	0.0314	11.529	2.53594	0.00206622	25.5132	0.61983	0.107222	0.274639	1.30427	0.206069	0.124863	0.162287	0.171053	2.56495	0.3846	1	0.4851	1.30935	0	2.70805	0.6168	4.8017	0.0529283	0.0151657
333	2015	C	1	0	佛山市	0	0	4.25	4	71.14	2	60.09	2	64.63	6	81.18	0.026982	-1.94616	-3.31858	-1.20459	0.178939	0.00854799	11.4436	1.10955	11.076	0.0448	11.5927	2.47606	0.00378238	25.5819	0.565113	0.109376	0.267772	1.11138	0.207729	0.0810989	0.145371	-0.022778	2.48491	0.4167	1	0.49161	1.34237	0	2.77259	0.598436	3.5612	0.0537539	0.0191136
333	2016	C	1	1	佛山市	0	0	4	4	72.66	2	62.5	2	64.21	6	83.55	0.007696	-1.10421	-3.27802	-1.20066	0.157841	0.00668305	11.4764	1.2159	10.49	0.0818	11.6604	2.46874	0.00405051	25.8626	0.595683	0.105943	0.253774	1.06227	0.156477	0.0915992	0.123427	0.14882	2.30259	0.4	1	0.429033	1.63356	0	2.83321	0.512664	2.1833	0.0604913	0.0362674
333	2017	C	1	1	佛山市	0	0	4.75	5	78.59	3	66.37	6	80.46	6	83.55	0.003383	-0.198277	-3.19998	-1.21552	0.148751	0.0107114	11.531	1.28451	10.61	0.0391	11.7306	2.42268	0.00492227	26.2371	0.665768	0.088898	0.245042	1.14979	0.0985165	0.118675	0.0910927	0.513495	2.30259	0.4	1	0.504881	2.09502	0	2.89037	0.587026	2.1648	0.0614021	0.0229037
333	2018	C	1	1	佛山市	0	0	4.75	4	74.91	1	58.93	5	75.93	6	82.38	0.003132	1.40136	-3.21963	-1.21104	0.16306	0.0112679	11.6506	1.32152	10.854	0.0519	11.7574	2.5498	0.00550297	26.2981	0.649397	0.084604	0.246898	1.0147	0.105654	0.112419	0.0850858	0.078735	2.19722	0.3333	1	0.535439	1.56297	0	2.94444	0.619255	2.1566	0.0368615	0.0128428
333	2019	C	1	1	佛山市	0	0	4.25	4	70.72	2	62.79	5	75.8	4	71.35	0.004254	-0.36196	-3.21326	-1.22864	0.151242	0.00898468	11.8123	1.38968	11.342	0.0787	11.8045	2.67119	0.00912989	26.4335	0.644	0.089373	0.252834	0.983692	0.127802	0.107444	0.071748	0.071443	2.07944	0.5	1	0.551481	1.96548	0	2.99573	0.629355	2.0224	0.0342588	0.0135524
333	2020	C	1	1	佛山市	0	1	4	4	72.67	2	62.79	4	73.31	5	77.28	0.006738	0.481219	-3.19033	-1.22592	0.150529	0.00825219	11.9133	1.42588	11.673	0.0643	11.6453	3.06373	0.00938961	26.6104	0.655263	0.083059	0.237398	0.858236	0.0820159	0.086232	0.06171	0.021585	2.07944	0.375	1	0.518629	2.53455	0	3.04452	0.647128	1.7316	0.0325948	0.0106657
333	2021	C	1	1	佛山市	0	1	4.75	5	75.31	3	67.33	5	79.55	5	76.19	0.007526	1.02339	-3.20331	-1.22183	0.145565	0.00800128	12.0185	1.36837	12.014	0.0511	11.7526	2.99579	0.0083621	26.6841	0.652464	0.077547	0.224003	0.911987	0.0904551	0.118378	0.0589073	0.20059	2.19722	0.3333	1	0.544644	1.95972	0	3.09104	0.61649	1.7517	0.0300858	0.0114616
333	2022	C	1	1	佛山市	0	1	5	5	78.02	3	68.63	6	81.07	6	80.74	0.005798	1.24429	-3.21141	-1.23523	0.0882263	0.00523287	12.0212	1.35959	12.364	0.0329	11.7945	3.26119	0.00658336	26.7696	0.640463	0.07356	0.207919	0.848654	0.0820197	0.108968	0.0617269	0.007867	2.19722	0.3333	1	0.572407	1.48802	0	3.13549	0.625173	1.7607	0.0336786
333	2023	C	1	1	佛山市	0	1	5.5	5	79.65	4	70	6	81.43	6	83.65	0.007522	-0.133327	-3.19779	-1.25112	0.0783758	0.00448911	12.1991	1.3905	12.725	0.0663	11.8388	3.5237	0.00432029	26.9096	0.641388	0.07428	0.206885	0.81893	0.119132	0.0973983	0.0636534	0.081763	2.19722	0.3333	1	0.556709	1.42288	0	3.17805	0.635531	1.723	0.0362246
338	2009	C	0	0	潍坊市	0.0292497	0	5	5	77.41	2	60.28	6	81.8	6	83.2	0.171987	1.68961	-3.2782	-1.13612	0.292865	0.0136373	10.3733	0.662384	8.469	0.1727	10.3202	1.76623	0.00204752	24.3128	0.567584	0.120561	0.29254	1.08497	0.0673501	0.160324	0.193712	0.072368	2.89037	0.3333	1	0.519194	1.35418	1	2.07944	0.818061	1.8342	0.0489785	0.0088459
338	2010	C	0	0	潍坊市	0.0457303	0	5	5	76.19	3	65.51	4	73.89	6	83.2	0.257914	-1.12356	-3.25201	-1.13902	0.384473	0.00424088	10.5499	0.720578	8.711	0.0621	10.4421	1.87519	0.00233448	24.6776	0.551952	0.18102	0.40988	1.43202	0.166846	0.168585	0.150323	0.781259	2.89037	0.3333	1	0.523837	1.50804	1	2.19722	0.686675	1.8342	0.0408388	0.0381334
338	2011	C	0	0	潍坊市	0.0432805	0	5	5	75.81	3	65.51	5	76.83	6	80.38	0.064191	1.69691	-3.25822	-1.13784	0.270485	0.00391012	10.6317	0.771363	8.668	0.1006	10.567	1.8746	0.00258436	24.843	0.530377	0.110817	0.241808	1.0524	0.0967215	0.168294	0.156847	-0.051522	2.89037	0.3333	1	0.511183	1.15892	1	2.30259	0.6767	1.8342	0.0503551	0.033405
338	2012	C	0	0	潍坊市	0.0259671	0	4.25	4	73.09	1	56.49	4	73.62	6	81.2	0.063327	2.00868	-3.28218	-1.14996	0.0893152	0.00669637	11.0173	0.828842	8.908	0.1133	10.6847	1.98625	0.00313476	24.9178	0.526552	0.050589	0.107269	0.753379	0.0415584	0.113237	0.1738	-0.197501	2.89037	0.3333	1	0.512507	1.12011	1	2.3979	0.694306	1.8342	0.067116	0.0103805
338	2013	C	0	0	潍坊市	0.03122	0	4	4	70.87	1	52.51	3	67.33	6	82.64	0.05642	0.45587	-3.28417	-1.16441	0.106992	0.00487096	10.6209	0.896464	9.233	0.195	10.8211	1.99213	0.00347694	25.0866	0.562831	0.052714	0.116167	0.805176	0.0734625	0.109183	0.167459	0.210656	2.89037	0.3333	1	0.511745	1.02264	1	2.48491	0.647415	1.719	0.0661326	0.02776
338	2014	C	0	0	潍坊市	0	0	4.5	4	74.77	1	58.28	4	74.76	6	83.2	0.041185	-0.012827	-3.21699	-1.19488	0.148573	0.00723885	11.0793	0.954892	9.477	0.0704	10.8556	2.08664	0.00279559	25.5142	0.660711	0.058155	0.15388	0.800641	0.0927794	0.104763	0.184528	0.365715	2.89037	0.3333	1	0.502816	1.05956	1	2.56495	0.607389	1.594	0.0804306	0.0312853
338	2015	C	1	0	潍坊市	0.0144225	0	4	4	72.76	1	50.93	4	74.39	6	82.82	0.018887	1.01362	-3.26956	-1.18057	0.0337664	0.00562159	10.656	1.03047	9.728	0.1091	10.93	2.0482	0.00267013	25.4671	0.636761	0.01824	0.051696	0.621771	0.0589684	0.103084	0.206016	-0.074303	2.56495	0.3846	1	0.497551	0.985881	1	2.63906	0.572849	1.5465	0.0973118	0.0083482
338	2016	C	1	1	潍坊市	0.00813134	0	4.75	5	75.49	2	60.56	4	73.9	6	84.2	0.006992	1.26271	-3.20977	-1.18898	0.0518523	0.00500637	10.5769	1.10961	9.191	0.1403	10.9899	2.27727	0.00321239	25.8231	0.728267	0.025703	0.083152	0.665998	0.0503104	0.0981193	0.157336	0.264021	2.56495	0.3846	1	0.49221	0.984405	1	2.70805	0.577433	1.546	0.0821141	0.0118895
338	2017	C	1	1	潍坊市	0.0145975	0	4.5	4	74.65	2	60.37	4	70.46	6	84.76	0.00821	0.999288	-3.2059	-1.20577	0.118699	0.00452245	10.6311	1.16075	9.494	0.1551	11.0438	2.18603	0.00336476	25.9684	0.702829	0.051976	0.18242	0.858326	0.0857334	0.104677	0.142732	0.626569	2.63906	0.3571	1	0.493993	1.02943	1	2.77259	0.616085	1.6061	0.0633478	0.0048837
338	2018	C	1	1	潍坊市	0.0149837	0	4.75	5	76.55	2	61.95	5	79.87	6	81.77	0.004265	0.425536	-3.22121	-1.19847	0.14632	0.00529602	10.6479	1.24165	9.732	0.1429	11.0932	2.20333	0.00326486	26.0476	0.696705	0.058877	0.196026	0.806533	0.108447	0.100714	0.143485	0.050712	2.70805	0.3333	1	0.516907	0.998213	1	2.83321	0.62895	1.6618	0.0393047	0.0053728
338	2019	C	1	1	潍坊市	0.0134919	0	5	5	77.35	3	66.68	5	78.87	6	81.77	0.009194	0.822667	-3.21529	-1.21684	0.160266	0.002878	10.6879	1.3223	10.104	0.1144	11.0147	2.65695	0.00380972	26.1906	0.705383	0.053865	0.180363	0.788771	0.10064	0.104368	0.111128	0.094848	2.70805	0.3333	1	0.530426	1.127	1	2.89037	0.659155	1.6757	0.0395742	0.0042775
338	2020	C	1	1	潍坊市	0.0143997	0	5	5	76.79	3	65.11	5	79.73	6	80.77	0.008291	1.13307	-3.21072	-1.21781	0.114078	0.00520723	10.7224	1.3697	10.468	0.1062	11.0433	2.97378	0.00383355	26.3245	0.702924	0.044426	0.150123	0.778165	0.0846838	0.115332	0.117166	0.132657	2.70805	0.3333	1	0.582342	1.0886	1	2.94444	0.664456	1.5836	0.0390394	0.0062351
338	2021	C	1	1	潍坊市	0.0139772	0	5.75	6	82.94	6	83	7	85.44	6	81.35	0.012027	1.2556	-3.24291	-1.19645	0.0880608	0.00386663	10.6679	1.34041	10.845	0.1027	11.22	2.82947	0.00329983	26.3474	0.628357	0.042189	0.125905	0.742731	0.0529069	0.114008	0.119801	0.030668	2.70805	0.3333	1	0.485765	1.11104	1	2.99573	0.544307	1.3779	0.0395779	0.0100087
338	2022	C	1	1	潍坊市	0.0189282	0	6.5	6	84.85	7	87.17	8	92.54	5	78.17	0.00236	2.6559	-3.26291	-1.20567	0.0344391	0.00429341	10.746	1.35171	11.236	0.0966	11.26	3.02837	0.00225764	26.4057	0.645478	0.019351	0.054218	0.596461	-0.00800058	0.113646	0.129039	-0.139477	2.70805	0.3333	1	0.485892	0.969911	1	3.04452	0.546437	1.2377	0.0462001
338	2023	C	1	1	潍坊市	0.0273367	0	6	6	84.8	7	85.86	6	84.94	6	83.89	0.010537	0.671474	-3.25744	-1.23581	0.0893161	0.00338474	10.7711	1.37754	11.64	0.1189	11.3018	3.19532	0.00209464	26.5351	0.662866	0.035711	0.10343	0.681491	0.0821873	0.11348	0.131866	0.22152	2.70805	0.3333	0	0.504924	1.01096	1	3.09104	0.603157	1.1938	0.0441982
400	2009	C	0	0	许昌市	0.325266	0	4	4	74.47	2	63.32	3	68.77	6	84.02	0.44198	3.11167	-4.71718	-0.985612	0.100042	0.0254515	7.92226	0.599615	7.403	0.1505	10.1745	1.00704	0.00108981	22.2504	0.449573	0.049334	0.094206	0.650521	0.0428423	0.221056	0.181717	0.168459	2.19722	0.3333	0	0.391562	1.92308	1	2.83321	0.596184	0.0637	0.103337	0.0075133
400	2010	C	0	0	许昌市	0.564981	0	4	4	74.84	3	69.72	3	66.31	6	83.2	0.451367	1.54022	-4.75763	-1.0109	0.0821633	0.0325367	8.70847	0.60413	7.422	0.1359	10.3267	1.05791	0.000989831	22.4733	0.520769	0.047726	0.09342	0.744319	0.0297669	0.183364	0.141655	0.26843	2.19722	0.3333	0	0.365088	2.19242	1	2.89037	0.57328	0.0503	0.100807	0.0298237
400	2011	C	0	0	许昌市	0.714168	0	4	4	73.63	3	69.72	3	68.31	5	79.21	0.295347	3.02814	-4.79424	-1.04478	0.0986417	0.0276182	8.70284	0.638147	7.445	0.1258	10.5166	1.0506	0.00102937	22.6794	0.580492	0.047431	0.106274	0.680205	0.0668262	0.200338	0.118785	0.131442	2.19722	0.3333	0	0.363228	1.43151	1	2.94444	0.599572	0.055	0.126974	0.0278589
400	2012	C	0	0	许昌市	0.600129	0	3.25	3	67.11	1	54.93	2	60.45	5	77.83	0.381471	3.64434	-4.83475	-1.07905	0.200219	0.01402	8.60868	0.68753	7.373	0.1067	10.5953	1.18809	0.00122591	22.6585	0.539772	0.081379	0.185096	0.944734	0.0718601	0.212959	0.150539	0.515668	2.19722	0.3333	0	0.374092	1.6212	1	2.99573	0.553831	0.055	0.0984101	0.264129
400	2013	C	0	0	许昌市	0.705503	0	3	3	68.06	1	58.51	2	62.27	5	76.83	0.335857	1.57603	-4.86913	-1.06486	0.232882	0.0139964	8.55043	0.738334	7.863	0.0584	10.5355	1.28345	0.00153854	22.8384	0.539619	0.101229	0.219914	0.940378	0.0979266	0.216455	0.12098	0.082098	2.07944	0.375	0	0.319855	2.11494	1	3.04452	0.66049	0.05	0.0806583	0.268152
400	2014	C	0	0	许昌市	0	0	4	4	72.41	3	67.76	3	68.79	5	77.21	0.597559	2.11483	-4.89586	-1.07349	0.235532	0.0152073	8.69785	0.784553	8.27	0.0949	10.7887	1.29332	0.00200577	23.1021	0.422345	0.12175	0.234769	0.789387	-0.0193018	0.17202	0.0953599	0.168362	2.19722	0.3333	0	0.44645	1.77771	1	3.09104	0.507624	0.0174	0.0939754	0.272421
400	2015	C	1	0	许昌市	0.191443	0	4.75	5	75.31	3	67.76	5	78.2	5	77.21	0.377368	1.07264	-4.92596	-1.08205	0.11433	0.012077	8.68592	0.842478	8.368	0.1258	10.823	1.42326	0.00128526	23.248	0.449712	0.069233	0.122978	0.631138	0.0403054	0.144969	0.0794263	-0.121171	2.19722	0.3333	0	0.49172	1.74499	1	3.13549	0.563357	0.0244	0.0768254	0.0169366
400	2016	C	1	1	许昌市	0.0741905	0	4.25	4	73.18	3	67.98	4	71.14	5	77.21	0.325568	0.77668	-4.9551	-1.09073	0.125119	0.00945635	8.68101	0.905826	8.198	0.0815	10.9064	1.45588	0.00119203	23.3836	0.472021	0.070217	0.130422	0.717258	0.0871988	0.134582	0.0722318	0.307734	2.19722	0.3333	0	0.498353	1.54982	1	3.17805	0.619698	0.0185	0.0641211	0.0159483
400	2017	C	1	1	许昌市	0.0420512	0	4.25	5	75.38	3	67.57	5	78.31	5	77.39	0.306319	2.56909	-4.98906	0	0.0886518	0.00751986	8.64153	0.942932	8.432	0.109	11.0006	1.4386	0.00190735	23.4517	0.469273	0.046052	0.086989	0.697796	-0.0022825	0.114269	0.0782584	0.075332	2.19722	0.3333	0	0.489243	1.338	1	3.21888	0.552878	0.0172	0.0671274	0.0334966
400	2018	C	1	1	许昌市	0.0311586	0	4.75	5	75.29	3	69.15	5	78.31	5	76.4	0.230249	2.14523	-5.03345	-1.06955	0.0277212	0.00950652	8.59822	1.07022	8.615	0.1106	11.0666	1.4374	0.00228452	23.4027	0.426969	0.018317	0.033222	0.549867	0.0317791	0.118218	0.0840533	-0.204648	2.19722	0.3333	0	0.479739	1.04191	1	3.2581	0.550512	0.0076	0.0497438	0.0090878
400	2019	C	1	1	许昌市	0.025158	0	5	5	76.17	4	72.02	5	77.77	5	77.21	0.313373	2.22528	-5.07037	-1.09357	0.0526466	0.00913383	8.591	1.13071	8.607	0.1062	11.0666	1.59298	0.00259177	23.4373	0.42498	0.033335	0.05807	0.684683	0.00503863	0.129369	0.0864789	0.236051	2.19722	0.3333	0	0.501189	1.14465	1	3.29584	0.569649	0.0076	0.042753	0.0235449
400	2020	C	1	1	许昌市	0.0198913	0	5	5	75.34	3	68.44	5	77.77	5	77.21	0.298362	1.65532	-5.10013	-1.09211	0.0825898	0.00598393	8.62101	1.20087	8.872	0.1047	11.2756	1.45173	0.00250968	23.545	0.452629	0.048904	0.088434	0.681877	0.0466179	0.146682	0.0950626	0.101921	2.19722	0.3333	0	0.543278	1.32018	1	3.3322	0.600534	0.0076	0.0428443	0.0433797
400	2021	C	1	1	许昌市	0.042217	0	4.25	4	72.39	2	62.19	6	80.61	5	76.03	0.354132	1.23568	-5.13503	-1.08004	0.0804546	0.00626085	8.60484	1.2254	9.145	0.0907	11.3316	1.47614	0.00253297	23.595	0.425149	0.049726	0.088566	0.695629	0.0738249	0.15477	0.0860563	0.07144	2.19722	0.3333	0	0.442885	1.91461	1	3.3673	0.571786	0.0023	0.0391963
400	2022	C	1	1	许昌市	0.0536853	0	4	4	70.54	2	61.99	5	79.25	4	72.47	0.199163	0.924555	-5.16749	-1.11036	0.0821902	0.00630988	8.63976	1.3707	9.426	0.0891	11.3564	1.5748	0.00305308	23.6654	0.424663	0.052941	0.092055	0.814617	0.0913426	0.14794	0.0856935	0.244085	2.19722	0.3333	0	0.4546	1.48689	1	3.4012	0.581236	0.0023	0.0345404
400	2023	C	1	1	许昌市	0.114329	0	5.25	6	82.02	6	82.16	7	86.56	5	79.12	0.234231	-0.185754	-5.19069	-1.11954	0.0818206	0.0282181	8.64136	1.42487	9.716	0.1502	11.2104	1.97111	0.00430723	23.8099	0.466133	0.057431	0.104078	0.826144	0.125469	0.123655	0.0803948	0.143687	2.19722	0.3333	0	0.488493	1.48267	1	3.43399	0.609854	0.0007	0.035427	0.0064249
401	2009	C	0	0	唐山市	0.00237465	0	6	6	83.31	5	77.94	6	82.24	7	86.78	0.158512	2.27393	-3.67229	-1.0635	0.160094	0.0211643	9.46032	0.840363	6.939	0.1441	10.8431	1.5357	0.00101167	23.7968	0.643191	0.061968	0.151809	0.403895	0.0911378	0.0410704	0.422267	0.518523	2.19722	0.3333	0	0.570177	1.72529	1	2.77259	0.869366	0.0088	0.122195	0.0047245
401	2010	C	0	0	唐山市	0.00712601	0	6	6	82.29	6	83.58	5	78.76	6	84.02	0.211292	2.31188	-3.66664	-1.02917	0.20313	0.00400186	9.66739	0.833481	6.459	0.1205	10.9919	1.54489	0.00106794	24.1328	0.692911	0.060415	0.184438	0.426162	0.0561596	0.0477772	0.445896	0.594772	2.19722	0.3333	0	0.580074	1.63993	1	2.83321	0.859342	0.0088	0.0959846	0.0040878
401	2011	C	0	0	唐山市	0.00760182	0	6	6	80.68	6	80.21	5	79.72	6	81.56	0.049087	4.22337	-3.6698	-1.06121	0.136623	0.00229529	9.76365	0.818101	6.406	0.1736	11.1784	1.43994	0.00113838	24.3628	0.654412	0.046296	0.140913	0.460376	0.0371482	0.0643441	0.484964	0.42155	2.19722	0.3333	0	0.718712	1.1853	1	2.89037	0.82421	0.0088	0.107143	0.0055674
401	2012	C	0	0	唐山市	0.00610371	0	6	6	81.15	6	83.42	6	80.58	6	80.38	0.044858	4.32714	-3.69482	-1.12775	0.00024169	0.0120526	9.80179	0.846525	6.622	0.1711	11.2469	1.52938	0.00180658	24.4491	0.677956	0.003468	0.010404	0.367265	0.0230358	0.0519236	0.580536	-0.070881	2.19722	0.3333	0	0.654021	1.11336	1	2.94444	0.782703	0.0051	0.130712	0.0051607
401	2013	C	0	0	唐山市	0.00524149	0	6	6	80.98	6	83.42	6	81.24	5	79.57	0.050231	3.07153	-3.72808	-1.12544	0.00462365	0.00949211	9.80168	0.889152	6.859	0.1367	11.3246	1.64793	0.00147809	24.4867	0.677456	0.004698	0.014577	0.37142	0.0281982	0.0471504	0.607138	0.075095	2.19722	0.3333	0	0.670829	0.948378	1	2.99573	0.745737	0.0051	0.125784	0.006829
401	2014	C	0	0	唐山市	0	0	5.5	4	70.87	6	85	5	77.16	1	59.41	0.062594	2.63814	-3.76408	-1.13215	#N/A	0.00893841	9.8554	0.920745	6.969	0.1434	11.2954	1.77428	0.00131051	24.5087	0.694987	-0.006368	-0.020301	0.359495	0.0511522	0.0476086	0.578374	-0.002928	2.19722	0.3333	0	0.721887	1.08526	1	3.04452	0.813757	0.0051	0.138014	0.0044431
401	2015	C	0	0	唐山市	0	0	4.25	5	75.13	6	83.2	6	82.73	3	65.88	0.032617	2.83766	-3.81577	-1.06178	#N/A	0.0155419	9.70972	1.02247	7.592	0.1457	11.2696	2.00494	0.00105198	24.4437	0.725468	-0.050397	-0.173624	0.260343	0.0222205	0.0370597	0.596001	-0.290875	2.07944	0.375	0	0.655043	1.08125	1	3.09104	0.725197	0.0051	0.207066	0.0005763
401	2016	C	0	1	唐山市	0	0	4	4	72.92	5	77.64	4	71.83	4	71.24	0.026954	2.55789	-3.85492	-1.06306	#N/A	0.0442596	9.58438	1.05895	7.201	0.1524	11.3052	2.08578	0.00135081	24.4485	0.730765	-0.00057	-0.002102	0.297281	0.0648816	0.0373407	0.562319	0.11045	2.19722	0.3333	0	0.630377	1.11732	1	3.13549	0.744778	0.002	0.135721	0.0010473
401	2018	C	0	1	唐山市	0.0152458	0	6	6	81.25	6	81.68	7	86.37	5	77.57	0.018174	0.761379	-3.85668	-1.18092	0.0926465	0.0130705	9.91051	1.25945	8.104	0.1269	11.3834	2.14258	0.00128048	24.8503	0.615594	0.042734	0.117824	0.515025	0.105343	0.0325962	0.451912	1.0176	2.19722	0.3333	0	0.443863	0.884719	1	3.21888	0.493636	0.002	0.115155	0.0041019
401	2019	C	1	1	唐山市	0.0115413	0	6.75	7	87.09	6	83.82	8	94.21	6	83.96	0.041472	0.987302	-3.90101	-1.16049	0.171936	0.0116127	10.0922	1.34887	8.493	0.1527	11.3698	2.35454	0.00142541	24.8298	0.525172	0.073786	0.16879	0.519133	0.135331	0.0472943	0.537034	0.118594	2.07944	0.375	0	0.422853	0.902603	1	3.2581	0.499291	0.002	0.12045	0.003553
401	2020	C	1	1	唐山市	0.00991076	0	7.25	8	90.93	7	87.39	9	96.79	7	88.77	0.057989	-0.041418	-3.94725	-1.15084	0.163169	0.00819834	10.0623	1.33442	8.717	0.1679	11.4454	2.51233	0.00171108	24.7999	0.454608	0.086625	0.169992	0.592904	0.148068	0.0459221	0.53161	0.028186	1.94591	0.4286	0	0.431077	0.778126	1	3.29584	0.478005	0	0.107966	0.0057203
401	2021	C	1	1	唐山市	0.0216901	0	4.25	3	69.85	2	61.15	5	78.65	4	74.2	0.050919	-0.200199	-3.98241	-1.1319	0.0692664	0.00850098	10.0386	1.22347	8.946	0.1585	11.5786	2.38475	0.0016364	24.8231	0.440104	0.070119	0.12686	0.609293	0.102957	0.0528429	0.536246	0.024181	2.19722	0.3333	0	0.713991	0.961054	1	3.3322	0.712375	0.0001	0.109749	0.0166896
401	2022	C	1	1	唐山市	0.0226417	0	3.75	4	72.22	3	66.57	5	79.46	4	74.03	0.025502	2.06869	-4.01659	-1.14245	0.031909	0.00615821	10.0161	1.32984	9.182	0.1767	11.6576	2.50844	0.00118441	24.8507	0.474307	0.022998	0.042388	0.564672	0.0365891	0.0690974	0.523363	-0.049368	2.19722	0.3333	0	0.666027	0.899332	1	3.3673	0.719239	0.0001	0.117235
401	2023	C	1	1	唐山市	0.0246764	1	4	4	73.03	3	67.78	5	76.71	5	76.74	0.070856	2.22413	-4.06383	-1.07932	#N/A	0.00663885	10.0034	1.40202	9.423	0.1662	11.682	2.71917	0.00132873	24.8163	0.489398	-0.028669	-0.055331	0.462962	0.0498935	0.0522964	0.539755	-0.182624	2.07944	0.375	0	0.666027	0.867787	1	3.4012	0.716473	0	0.129238
402	2009	K	0	0	北京市	0.00978989	0	5.75	6	80.52	1	56.24	7	87.5	6	81.93	0.122193	2.08392	-5.1712	-1.10177	0.0670519	0.0143719	6.78333	3.67187	8.658	0.1022	11.1627	6.34372	0.0103931	24.4693	0.623564	0.039341	0.089332	0.178418	-0.0370831	0.437963	0.0388013	0.113744	2.19722	0.3333	0	0.33462	1.32283	1	2.70805	0.538291	0.0283	0.052294	0.0542637
402	2010	K	0	0	北京市	0.0120713	0	5.25	5	78.99	1	56.24	6	84.74	6	81.04	0.076616	1.29782	-5.1645	-1.12058	0.0666112	0.00156503	7.48493	3.59039	8.907	0.1076	11.2377	6.3922	0.0126768	24.7154	0.681675	0.037994	0.110503	0.16805	-0.0458035	0.52526	0.0304665	0.301503	2.19722	0.3333	0	0.307786	1.05105	1	2.77259	0.417819	0.0275	0.0496613	0.0733922
402	2011	K	0	0	北京市	0.0126038	0	5	5	79.61	1	57.82	6	84.74	6	81.93	0.056942	4.58465	-5.18453	-1.13363	0.104833	0.00188514	7.82084	3.7861	8.868	0.1104	11.3103	6.25619	0.0112648	24.813	0.690309	0.036134	0.115151	0.169238	-0.0372635	0.533522	0.0456664	0.188278	2.19722	0.3333	0	0.332152	0.99696	1	2.83321	0.494934	0.0212	0.0522708	0.0345032
402	2012	K	0	0	北京市	0.022439	0	5	5	79.22	1	57.82	6	84.74	6	81.04	0.050251	4.28198	-5.1902	-1.15235	0.119261	0.00148648	7.87131	3.89531	8.895	0.1063	11.3791	6.28623	0.0111829	24.9722	0.699479	0.041564	0.136392	0.265642	-0.027501	0.538033	0.0376595	0.78825	2.19722	0.3333	0	0.344438	0.991255	1	2.89037	0.477942	0.0716	0.0324197	0.0273975
402	2013	K	0	0	北京市	0.0278546	0	5	5	77.54	1	54.67	6	81.81	6	81.04	0.079927	2.97336	-5.2115	-1.13242	0.127384	0.00495613	7.81964	4.03198	9.282	0.1207	11.4426	6.25535	0.0120342	25.0549	0.678514	0.048186	0.154723	0.272176	-0.0382007	0.562502	0.0342288	0.153692	2.19722	0.3333	0	0.323957	0.886732	1	2.94444	0.404044	0.1183	0.0248218
402	2014	K	0	0	北京市	0.0424101	0	4.5	4	73.12	1	56.53	6	80.26	4	71.83	0.065814	2.63777	-5.21828	-1.15325	0.0967899	0.007457	7.84031	4.13578	9.212	0.1277	11.5129	6.23469	0.0132537	25.1959	0.693987	0.038037	0.121445	0.269292	-0.00366696	0.578292	0.0327851	0.108302	2.19722	0.3333	0	0.501788	1.11464	1	2.99573	0.633973	0.0849	0.0282778
402	2015	K	0	0	北京市	0.0486479	0	4.25	5	77.15	1	55.79	6	83.02	5	78.64	0.033412	4.12195	-5.21137	-1.09308	0.0382862	0.0140333	7.91279	4.57462	9.192	0.1279	11.5759	7.43604	0.0125049	25.3837	0.72555	0.02344	0.081175	0.161071	-0.121515	0.614272	0.0273048	-0.293664	2.19722	0.3333	0	0.581651	1.05162	1	3.04452	0.636949	0.0804	0.0395864	0.018486
402	2016	K	0	1	北京市	0.0669723	0	5.75	6	82	1	58.11	7	87.78	6	84.41	0.024015	1.03319	-5.23429	-1.16627	0.0548943	0.012207	8.14032	4.76782	9.171	0.1254	11.6801	7.37893	0.0111332	25.4492	0.724098	0.02577	0.093642	0.181705	0.151423	0.500306	0.0233086	0.275481	1.79176	0.5	0	0.641451	0.996939	1	3.09104	0.699284	0.0587	0.0308743	0.0185884
402	2017	K	0	1	北京市	0.0736586	0	5.25	5	78.82	1	52.41	6	84.74	6	81.93	0.025809	3.96939	-5.24639	-1.17453	0.105114	0.00845169	8.13593	4.89399	9.236	0.1371	11.7675	7.18669	0.0129116	25.5533	0.730814	0.034469	0.126552	0.214402	-0.0579347	0.501867	0.0208512	0.285444	2.19722	0.3333	0	0.656828	0.996014	1	3.13549	0.720624	0.04	0.021551	0.0185475
402	2018	K	0	1	北京市	0.0700564	0	5.5	5	79.93	2	60.58	6	81.76	6	84.57	0.015261	4.46069	-5.23863	-1.15238	0.0922204	0.0165658	8.17667	5.02215	9.239	0.1438	11.8509	7.50581	0.0140459	25.724	0.749551	0.029498	0.113885	0.161563	-0.0607913	0.522723	0.017276	-0.133467	2.19722	0.3333	0	0.663975	0.879203	1	3.17805	0.714742	0.0491	0.0227164	0.0112058
402	2019	K	0	1	北京市	0.0756084	0	5.25	6	80.03	1	56.75	6	84.27	6	83.68	0.030052	3.54528	-5.25339	-1.17631	0.0901632	0.0558636	8.26023	5.23404	9.512	0.1348	12.009	6.72657	0.0122534	25.8108	0.759361	0.026541	0.108183	0.168648	0.0164226	0.494112	0.015441	0.184082	2.19722	0.3333	0	0.689401	0.909225	1	3.21888	0.762017	0.0491	0.0231227	0.0048684
402	2020	K	0	1	北京市	0.0747682	0	6	6	82.16	1	59.78	7	89.28	6	82.8	0.027143	2.87993	-5.28046	-1.17391	0.0343471	0.0696421	8.17414	5.24401	9.813	0.1321	12.013	7.26091	0.0113831	25.8544	0.764757	0.013397	0.056316	0.109429	0.0584481	0.484644	0.015605	-0.307922	2.19722	0.3333	0	0.683462	0.878743	1	3.2581	0.746552	0.0491	0.0184753	0.0056611
402	2021	K	0	1	北京市	0.0593929	0	4.5	4	74.19	3	68.08	5	75.83	5	77.73	0.052764	3.43339	-5.32834	-1.19703	0.0362862	0.0508867	8.10319	4.53988	10.123	0.1365	12.1226	6.90792	0.0111608	25.8279	0.7415	0.009468	0.038378	0.144648	0.0236254	0.5113	0.0174618	0.332974	2.19722	0.3333	0	0.63493	0.844224	1	3.29584	0.679076	0.0484	0.017785	0.0137214
402	2022	K	0	1	北京市	0.067233	0	5.25	5	79.99	5	79.21	6	83.34	5	78.07	0.01393	3.6609	-5.38999	-1.19068	0.0144108	0.0501667	7.88005	5.24349	10.444	0.14	12.1564	7.40053	0.0117446	25.754	0.722818	0.004074	0.015232	0.129038	0.0366639	0.485452	0.0163864	-0.151086	2.19722	0.3333	0	0.63493	0.825415	1	3.3322	0.712811	0.0466	0.019282	0.0121264
402	2023	K	0	1	北京市	0.0566492	0	6	6	82.05	6	80.3	5	78.24	7	86.28	0.071109	3.6209	-5.44674	-1.10898	#N/A	0.0475326	7.73368	5.68984	10.774	0.1442	12.2075	7.97605	0.0119263	25.6957	0.721483	-0.014501	-0.052198	0.084523	0.0419595	0.479321	0.0168114	-0.386971	2.19722	0.3333	0	0.63493	0.796719	1	3.3673	0.672135	0.0292	0.0292372	0.0062858
403	2018	C	1	1	太原市	0.0333415	0	1	1	59.4	1	48.19	3	69.96	1	57.99	0.348287	6.39558	-4.07533	-0.922767	0.13762	0.0211979	6.96885	1.15103	7.177	0.1262	11.3882	6.31005	0.00644738	20.999	0.529828	0.056813	0.129023	0.651857	0.0885235	0.295889	0.313491	0.254553	1.79176	0.3333	0	0.547223	5.61199	0	3.2581	0.557007	0.0019	0.1821	0.0144217
403	2019	C	1	1	太原市	0.0400475	0	1	1	59.7	1	49.98	3	65.12	2	61	0.736827	4.23895	-4.11105	-0.993071	0.184871	0.0128383	6.77422	1.16122	6.74	0.1027	11.4153	6.54534	0.00575934	20.9636	0.369631	0.121823	0.221815	0.706726	0.150076	0.318214	0.298527	0.064911	1.94591	0.4286	0	0.540837	7.26607	0	3.29584	0.602805	0.0019	0.122212	0.0120918
403	2020	C	1	1	太原市	0.0647267	0	2	2	63.29	1	51.77	2	62.14	3	69.95	0.895272	4.85713	-4.18013	-0.939553	0.232949	0.00348018	6.80461	1.16391	6.977	0.1646	11.2738	6.99145	0.00838587	21.2256	0.414924	0.124943	0.206596	0.718088	0.117898	0.26731	0.21193	0.14665	1.94591	0.4286	0	0.517042	11.6229	0	3.3322	0.638919	0.355	0.111943	0.0221438
403	2021	C	1	1	太原市	0.0400688	0	3.5	4	71.05	1	56.41	4	73.48	5	75.9	0.47271	-5.17795	-4.27418	-1.06215	0.0586384	0.00180971	7.39449	0.864166	7.222	0.1057	11.4684	6.21055	0.006718	22.6816	0.107236	0.089316	0.10735	0.449781	0.0575945	0.104259	0.104367	0.877954	2.56495	0.3846	0	0.424041	2.46743	0	3.3673	0.590317	4.0442	0.0962233	0.0186345
403	2022	C	1	1	太原市	0.0699475	0	3.25	3	68.33	1	56.41	4	71.54	4	71.29	0.336465	0.106138	-4.31055	-1.0642	0.0835323	0.00622797	7.64635	0.755413	7.476	0.1143	11.5417	6.44943	0.00278903	22.8005	0.14046	0.077994	0.089119	0.3192	0.0656725	0.0781338	0.109451	0.219834	2.56495	0.3846	0	0.412857	2.01147	0	3.4012	0.59793	3.3757	0.0688
403	2023	C	1	1	太原市	0.0823335	0	4	4	74.05	2	63.28	5	77.58	5	76.22	0.397886	-0.346156	-4.3475	-1.07478	0.0897852	0.00180764	7.794	0.823698	7.738	0.1239	11.5363	6.89829	0.0073409	22.8786	0.14004	0.073615	0.085622	0.280353	0.0786754	0.105368	0.109263	-0.031792	2.56495	0.3846	0	0.404836	2.26326	0	3.43399	0.660432	1.4639	0.0774013
404	2009	C	0	0	景德镇市	0.00166101	0	4	4	73.42	1	59.25	4	71.68	6	81.82	0.530589	3.70366	-3.73863	-0.957076	0.25602	0.00772999	8.66423	0.69159	6.748	0.06	10.0508	1.36844	0.00118643	21.7149	0.688138	0.071779	0.225624	1.36386	0.0374845	0.239332	0.195054	0.057226	2.19722	0.3333	0	0.549044	1.49537	1	2.77259	0.601113	0.0051	0.0754359	0.0660626
404	2010	C	0	0	景德镇市	8.70489e-05	0	3.25	3	69.81	1	50.5	3	67.84	6	81	0.474531	2.9526	-3.79164	-0.935152	0.0949477	0.0128595	8.72794	0.620193	7.214	0.0417	10.2804	1.3606	0.00127454	22.002	0.752424	0.023557	0.088346	1.41034	0.0367072	0.210377	0.218308	0.41812	2.19722	0.3333	0	0.448987	1.40211	1	2.83321	0.451485	0.0051	0.0609412	0.062316
404	2011	C	0	0	景德镇市	0.02072	0	3	3	66.3	1	48.79	2	63.69	5	77.01	0.161278	4.6966	-3.83582	-0.960794	0.0826969	0.00410842	8.75511	0.619443	7.181	0.0427	10.4751	1.35705	0.00137114	22.1623	0.776426	0.018442	0.078604	1.37485	0.0374417	0.166647	0.184837	0.162645	2.19722	0.3333	0	0.450248	1.08392	1	2.89037	0.4775	0.0051	0.0535602	0.0226475
404	2012	C	0	0	景德镇市	0.0265559	0	3	3	68.06	1	57.45	3	65.26	5	75.37	0.175435	4.26747	-3.87745	-0.984627	0.183487	0.00186936	8.69668	0.64921	7.293	0.1371	10.5752	1.41638	0.00151691	22.277	0.763796	0.038719	0.168161	1.25231	0.0591013	0.231752	0.176268	0.043495	2.19722	0.3333	0	0.395465	1.11489	1	2.94444	0.405165	0.0051	0.0649932	0.0176874
404	2013	C	0	0	景德镇市	0.0459407	0	3	3	69.16	1	59.25	3	66.25	5	76.19	0.303508	2.1428	-3.91642	-1.05024	0.105261	0.0065065	8.71964	0.665331	7.167	0.0359	10.6209	1.51502	0.00167841	22.5741	0.609224	0.045731	0.140759	1.2096	0.00150007	0.191602	0.145463	0.197908	2.19722	0.3333	0	0.468406	1.08694	1	2.99573	0.532853	0.003	0.0802825	0.0025328
404	2014	C	0	0	景德镇市	0.0521803	0	3.75	4	74.37	3	66.3	5	76.31	5	77.19	0.416032	0.700714	-3.95577	-1.06168	0.104851	0.00258198	8.80672	0.704273	7.77	0.1017	10.7241	1.5822	0.00154305	22.611	0.591573	0.044652	0.111696	1.07987	0.122724	0.140616	0.177803	0.043652	2.19722	0.3333	0	0.400131	1.24418	1	3.04452	0.392372	0.1906	0.0815826	0.0465278
404	2015	C	1	0	景德镇市	0.137159	0	4.25	5	75.14	2	62.93	5	78.66	5	79	0.410756	0.505428	-3.9946	-1.06678	0.107124	0.00206928	8.80762	0.800556	8.323	0.096	10.7625	1.69677	0.00337683	22.665	0.574696	0.048857	0.117136	1.01011	0.104088	0.107345	0.191124	-0.020955	2.19722	0.3333	0	0.35527	1.28762	1	3.09104	0.40144	0.2926	0.0804891	0.0517676
404	2016	C	1	1	景德镇市	0.119682	0	4.25	4	72.82	2	62.93	4	71.14	5	79	0.344906	1.28578	-4.03	-1.05072	0.129792	0.00359854	8.77137	0.900307	8.553	0.1151	10.8394	1.803	0.00222342	22.8154	0.598875	0.052513	0.127364	0.924181	0.0241237	0.106773	0.167594	0.015888	2.19722	0.3333	0	0.377795	1.28866	1	3.13549	0.45948	0.3714	0.0700917	0.0676659
404	2017	C	1	1	景德镇市	0.0905542	0	4.25	5	75.55	3	66.98	5	75.42	6	80	0.311184	2.29982	-4.06044	0	0.0514769	0.00454708	8.77044	0.945611	8.82	0.107	10.7665	2.09134	0.00469614	23.0237	0.602868	0.023461	0.058812	0.897544	-0.0162581	0.138187	0.138801	0.164969	2.07944	0.375	0	0.369423	1.0414	1	3.17805	0.343645	0.3061	0.0652383	0.0281417
404	2018	C	1	1	景德镇市	0.0700443	0	4.5	4	73.83	3	68.56	5	75.42	5	75.46	0.257012	1.09021	-4.0998	0	0.0368708	0.00360144	8.95377	1.06714	8.947	0.0539	10.8341	2.31333	0.0031499	23.0352	0.582463	0.01632	0.040059	0.887879	0.0170742	0.117162	0.155907	0.098187	2.19722	0.3333	0	0.398093	0.848913	1	3.21888	0.355157	0.2605	0.0358113	0.0173475
404	2019	C	1	1	景德镇市	0.0614061	0	4.75	5	78.6	3	68.56	7	87.64	5	77.64	0.328401	0.240134	-4.13894	-1.07767	0.0206193	0.00245672	8.96214	1.08955	9.056	0.0595	10.9192	2.41275	0.00501587	23.0504	0.584174	0.009833	0.023599	0.942782	0.0763481	0.120979	0.150552	0.076132	2.19722	0.3333	0	0.390304	0.852719	1	3.2581	0.377572	0.2175	0.0366955	0.0175283
404	2020	C	1	1	景德镇市	0.0557462	0	4.75	5	75.09	2	60.06	5	78.52	6	80.45	0.246439	1.06654	-4.17503	-1.07391	0.0260442	0.00179833	8.96034	1.11904	9.424	0.0597	10.9876	2.7142	0.00537732	23.1155	0.596269	0.017152	0.041877	0.986745	0.0511948	0.119302	0.134751	0.090078	2.07944	0.375	0	0.388146	0.919028	1	3.29584	0.360032	0.0439	0.0287648	0.0150889
404	2021	C	1	1	景德镇市	0.0455322	0	4.25	4	70.58	1	59.8	5	77.57	4	74.56	0.223742	-0.492274	-4.21042	-1.07519	0.0417923	0.00150527	8.9334	1.07802	9.806	0.0614	10.986	2.71864	0.00501851	23.1856	0.606311	0.025556	0.064126	1.16441	0.136239	0.131033	0.124044	0.262707	2.19722	0.3333	0	0.378286	0.88457	1	3.3322	0.376863	0.0439	0.0270242	0.014112
404	2022	C	1	1	景德镇市	0.0727638	0	4	4	73.2	2	62.3	5	78.19	5	78.56	0.16848	0.841542	-4.24545	-1.08141	0.0604085	0.00213957	8.92039	1.13212	10.205	0.0594	11.2055	2.82829	0.00583641	23.2548	0.611478	0.034353	0.087856	1.07756	0.0705238	0.118954	0.12164	-0.007847	2.19722	0.3333	0	0.372648	0.913836	1	3.3673	0.358213	0.1518	0.0247868
404	2023	C	1	1	景德镇市	0.1113	0	4	4	72.57	1	59.97	5	79.64	5	77.93	0.232987	0.822714	-4.2775	-1.08772	0.113954	0.00104217	8.96149	1.17048	10.619	0.0647	11.2138	3.21952	0.00644879	23.3553	0.626413	0.040125	0.10543	0.973375	0.0621728	0.121946	0.101373	-0.015767	2.19722	0.3333	0	0.378647	0.921548	1	3.4012	0.397357	0.3494	0.0312681
407	2009	C	0	0	济南市	0.0265558	0	4.5	5	75.6	1	51.51	4	74.79	7	87.59	0.555359	4.3578	-3.73161	-0.94039	0.265006	0.0134828	7.4668	0.662384	8.469	0.1727	10.8273	3.59977	0.00157026	21.6025	0.52568	0.106251	0.229635	0.648012	-0.0353616	0.150053	0.32884	-0.188613	2.3979	0.5455	0	0.193509	2.32647	0	2.77259	0.194994	0.0136	0.059947	0.0415085
407	2010	C	0	0	济南市	0.0101908	0	4.25	4	72.87	1	49.58	4	71.9	6	84.57	0.623415	1.68601	-3.78607	-0.991291	0.2655	0.00318664	7.41035	0.720578	8.711	0.0621	10.9676	3.53649	0.00158899	21.8594	0.5325	0.12146	0.258165	0.779356	0.000888313	0.162198	0.249269	0.474382	2.3979	0.5455	0	0.176475	1.82726	0	2.83321	0.170885	0.0122	0.0499122	0.0438652
407	2011	C	0	0	济南市	0.00849962	0	4	4	73.88	1	57.16	4	70.06	6	84.13	0.334195	3.68729	-3.82634	-0.931761	0.00445819	0.0082271	7.34666	0.771363	8.668	0.1006	11.0715	3.44269	0.00171459	21.8656	0.552447	0.001993	0.004356	0.732547	0.0385027	0.139166	0.240675	0.063282	2.3979	0.5455	0	0.132263	1.3415	0	2.89037	0.163916	0.0112	0.0323995	0.0582405
407	2012	C	0	0	济南市	0.00555144	0	2	1	59.37	1	50.94	3	65.58	1	59.72	0.182573	4.46431	-3.86692	-0.955536	#N/A	0.00358174	7.3473	0.828842	8.908	0.1133	11.1483	3.58157	0.00210641	21.8786	0.585817	-0.044176	-0.102554	0.69317	0.0143774	0.133603	0.252364	-0.044598	2.3979	0.3636	0	0.148445	1.91079	0	2.94444	0.161438	0.0104	0.0555133	0.0656927
407	2013	C	0	0	济南市	0.0065918	0	3	4	70.71	2	62.42	5	78.1	4	70.3	0.251881	3.04546	-3.91067	-0.951889	0.0394285	0.00307769	7.37023	0.896464	9.233	0.195	11.3542	3.56021	0.00208036	21.9735	0.615876	0.015261	0.038302	0.669886	0.00490185	0.140944	0.230197	0.021108	2.3979	0.3636	0	0.12256	1.62706	0	2.99573	0.13325	0.0099	0.0531971	0.130699
407	2014	C	0	0	济南市	0.00410954	0	4	4	71.53	1	53.29	5	79.32	5	75.61	0.501269	1.82227	-3.95526	-0.974392	0.0268601	0.0314764	7.29029	0.954892	9.477	0.0704	11.3151	3.50963	0.00166331	22.1349	0.506253	0.01384	0.031225	0.750205	0.0143129	0.120626	0.104284	0.286407	2.3979	0.3636	0	0.238787	1.55533	0	3.04452	0.247983	5.5249	0.0398202	0.0250396
407	2015	C	1	0	济南市	0.00294637	0	4	4	72.8	1	51.88	4	70.06	6	84.41	0.461474	1.39612	-3.99551	-1.02906	0.0125334	0.0230443	7.33629	1.03047	9.728	0.1091	11.3612	3.80759	0.00188139	22.1468	0.494332	0.010047	0.020105	0.608011	0.0157754	0.0856212	0.160286	-0.126349	2.3979	0.3636	0	0.247949	1.89185	0	3.09104	0.222461	5.5246	0.0500224
407	2016	D	0	1	济南市	0.00567914	0	4	4	74.77	1	49.95	5	76.99	7	85.3	0.447969	1.81643	-4.03619	-0.975752	#N/A	0.0222395	7.38337	1.10961	9.191	0.1403	11.4186	4.03955	0.00181511	22.1825	0.41451	-0.07693	-0.140823	0.626858	0.0118844	0.0835953	0.203027	0.055949	2.3979	0.3636	0	0.348843	1.98284	0	3.13549	0.363458	4.859	0.0548217
407	2017	D	0	1	济南市	0.0142342	0	4.5	5	75.39	1	57.92	5	76.99	6	82.79	0.422036	1.99907	-4.07788	-0.980209	0.0476369	0.0423917	7.30047	1.16075	9.494	0.1551	11.4955	4.03284	0.00180353	22.3417	0.465132	0.026253	0.047035	0.819019	0.0400703	0.0817975	0.209508	0.444625	2.19722	0.4444	0	0.326938	1.67603	0	3.17805	0.374536	0.0071	0.0368583	0.0173588
407	2018	D	0	1	济南市	0.025277	0	4.25	4	72.22	1	52.09	4	72.33	6	81.77	0.284842	1.46056	-4.11627	-0.989211	0.0711791	0.0285546	7.6014	1.24165	9.732	0.1429	11.574	3.98036	0.00267834	22.5838	0.574102	0.03171	0.066924	0.815158	0.0441794	0.0695883	0.22808	0.221487	2.30259	0.4	0	0.293587	1.07423	0	3.21888	0.306152	0.0093	0.0283112	0.0112895
407	2019	D	0	1	济南市	0.0243954	0	3.25	2	64.48	1	50.16	7	85.03	1	59.13	0.395237	1.45035	-4.15604	-1.04865	0.0632197	0.027609	7.65964	1.3223	10.104	0.1144	11.5751	3.80466	0.00457225	22.5965	0.552642	0.031532	0.072206	0.826862	0.0907619	0.0635318	0.243986	0.143822	2.30259	0.4	0	0.297156	1.0338	0	3.2581	0.293113	0.0093	0.0277713	0.0111759
407	2020	D	0	1	济南市	0.0234622	0	2.5	3	68.44	1	47.09	6	80.98	4	71.21	0.341627	1.85274	-4.19532	-1.05513	0.0732555	0.0411513	7.63579	1.3697	10.468	0.1062	11.61	3.98579	0.0039096	22.6332	0.570321	0.03252	0.074186	0.693173	0.0666096	0.0603258	0.265286	-0.140591	2.30259	0.4	0	0.289077	1.12363	0	3.29584	0.327	0.0093	0.0296143	0.0100582
407	2021	D	0	1	济南市	0.0220888	0	3.75	4	71.49	2	63.14	5	76.83	5	77.08	0.320812	2.21814	-4.23436	-1.03367	0.02654	0.0217855	7.6454	1.34041	10.845	0.1027	11.7205	3.96948	0.00360194	22.6746	0.570659	0.015797	0.03678	0.659533	0.0413913	0.0532215	0.269456	-0.010604	2.19722	0.3333	0	0.354352	1.12525	0	3.3322	0.355006	0.0088	0.0400626	0.0109778
407	2022	D	0	1	济南市	0.0242208	0	4	4	70.83	2	62.86	5	77.84	5	75.18	0.222726	2.68431	-4.27393	-1.0459	0.056131	0.00374486	7.63289	1.35171	11.236	0.0966	11.762	4.21281	0.00234802	22.6915	0.567544	0.025658	0.059544	0.654448	0.0375955	0.0528568	0.272834	0.021467	2.19722	0.3333	0	0.33946	1.04071	0	3.3673	0.345325	0.0088	0.0267854	0.0247883
407	2023	D	0	1	济南市	0.0582507	0	3.25	3	69.17	2	61.32	5	76.41	4	73.28	0.34788	2.01438	-4.31465	-1.05919	0.0702934	0.00260497	7.63192	1.37754	11.64	0.1189	11.8156	4.33824	0.00364727	22.6629	0.532368	0.030237	0.067296	0.661978	0.0684192	0.0567988	0.283011	0.006872	2.19722	0.3333	0	0.323546	0.990418	0	3.4012	0.321927	0.0088	0.0278695	0.0344983
409	2013	B	0	0	济南市	0	0	3.75	4	73.51	1	49.73	4	73.04	6	84.83	0.594544	1.91876	-3.90714	-0.947976	0.131552	0.0196106	4.04305	0.896464	9.233	0.195	11.3542	3.56021	0.00208036	21.2981	0.383685	0.085583	0.125	0.274951	0.0251166	0.0077299	0.275862	0.367785	2.19722	0.3333	0	0.58157	2.00596	1	3.04452	0.729162	0	0.149648	0.0344699
409	2014	B	0	0	济南市	0	0	4	4	73.62	1	51.44	6	80.05	5	79.7	0.33849	3.50487	-3.98868	-0.953872	#N/A	0.00508504	3.98898	0.954892	9.477	0.0704	11.3151	3.50963	0.00166331	21.9208	0.617375	-0.011588	-0.024961	0.12484	-0.0249236	0.0122849	0.231516	-0.223428	2.19722	0.3333	0	0.492949	1.66913	1	3.09104	0.546209	0	0.264739	0.184338
409	2015	B	0	0	济南市	0.000502538	0	4	4	73.3	1	51.44	6	80.05	5	79.01	0.286622	4.02378	-4.03772	-1.21632	0.0868022	0.0467605	7.76514	1.03047	9.728	0.1091	11.3612	3.80759	0.00188139	22.4596	0.727898	0.02745	0.087747	0.493877	-0.0451168	0.101328	0.171878	5.98762	2.19722	0.3333	0	0.35742	1.60176	1	3.13549	0.422855	0.0001	0.0511847
409	2016	S	0	1	济南市	0.000476627	0	4	4	74.09	1	54.21	5	78.38	6	80.51	0.139279	4.0114	-4.07683	-0.975217	#N/A	0.0351381	7.66856	1.10961	9.191	0.1403	11.4186	4.03955	0.00181511	22.5475	0.78185	-0.032305	-0.132431	0.373464	-0.0324523	0.157547	0.154107	-0.000987	2.19722	0.3333	0	0.355323	1.65449	1	3.17805	0.415006	0	0.0736049	0.0563012
409	2017	S	0	1	济南市	0.000509253	0	2.75	2	60.37	1	47.74	3	68.53	2	60.9	0.159292	4.43374	-4.11728	-0.957988	#N/A	0.0170402	7.54274	1.16075	9.494	0.1551	11.4955	4.03284	0.00180353	22.5106	0.818473	-0.044571	-0.222658	0.235016	-0.0111337	0.156291	0.176046	-0.354984	2.19722	0.3333	0	0.345056	1.20655	1	3.21888	0.423912	0	0.107672	0.0486223
409	2021	I	1	1	济南市	0.05375	0	3	3	69.19	1	56.14	4	72.46	4	70.56	0.884312	3.58944	-4.18374	0	0.0617319	0.0286835	6.46614	1.34041	10.845	0.1027	11.7205	3.96948	0.00360194	20.905	0.499622	0.031782	0.059615	0.462891	-0.0156371	0.162895	0.156263	-0.765096	2.19722	0.3333	0	0.347361	2.85185	1	3.3673	0.370019	0	0.19903	0.0455917
409	2022	I	1	1	济南市	0.0381405	0	3.25	4	70.78	1	56.14	4	71.38	4	74.76	0.73614	-1.37407	-4.29349	-0.987546	0.0388121	0.0137383	6.95655	1.35171	11.236	0.0966	11.762	4.21281	0.00234802	21.6309	0.339656	0.033253	0.054676	0.593322	0.0467024	0.108641	0.0859437	1.14692	2.3979	0.3636	0	0.465224	1.67404	1	3.4012	0.495723	0.0115	0.137765	0.0049606
409	2023	I	1	1	济南市	0.0289984	0	4.5	4	74.8	1	57.29	5	78.46	5	77.21	0.760109	1.39185	-4.33737	-0.953319	0.0692064	0.0096942	7.01031	1.37754	11.64	0.1189	11.8156	4.33824	0.00364727	21.6932	0.335182	0.044369	0.066961	0.446157	0.0344945	0.0983	0.0796527	0.046157	2.3979	0.3636	0	0.457904	2.06245	1	3.43399	0.45908	0.0115	0.141379	0.0069215
410	2009	C	0	0	沈阳市	0.000825656	0	3.75	4	72.8	1	55.88	3	67.51	7	85.01	0.16054	6.80442	-3.78586	-0.988716	0.0385197	0.0177935	9.5074	0.761412	8.463	0.0685	10.9088	2.75091	0.00319296	22.9156	0.841649	0.005754	0.037527	0.653849	-0.123779	0.294486	0.157215	-0.086736	2.19722	0.3333	0	0.489692	1.52151	1	2.83321	0.50687	0.0004	0.0942715	0.0009405
410	2010	C	0	0	沈阳市	0.00101116	0	3.5	4	70.74	1	52.51	3	69.33	6	81	0.272	4.11048	-3.81762	-0.973083	0.098981	0.0162809	9.5346	0.73039	8.539	0.0803	11.0406	2.8026	0.00305911	23.073	0.852209	0.014281	0.093418	0.823568	-0.0247249	0.364846	0.149737	0.346167	2.19722	0.3333	0	0.457174	1.47402	1	2.89037	0.483972	0.0004	0.0895616	0.0062442
410	2011	C	0	0	沈阳市	0.000954564	0	3	3	68.03	1	48.79	3	68.22	5	77.72	0.022548	5.63055	-3.84674	-1.06904	0.0498766	0.0128571	9.60865	0.729231	8.161	0.0908	11.1934	2.66826	0.00343717	23.2374	0.868213	0.00964	0.069288	0.841653	0.0147212	0.361651	0.116016	0.194342	2.19722	0.3333	0	0.467936	1.16989	1	2.94444	0.542611	0.0011	0.0902029	0.0069682
410	2012	C	0	0	沈阳市	0.000230573	0	3	3	69.18	1	49.35	3	67.61	6	80.36	0.008159	7.36646	-3.88217	-1.00677	0.0211313	0.0076029	9.57359	0.79807	8.052	0.0691	11.2958	2.7456	0.00373198	23.2976	0.875378	0.002656	0.020737	0.611269	-0.0971661	0.331282	0.100156	-0.189782	2.3979	0.3636	0	0.472086	1.13116	1	2.99573	0.49243	0.001	0.0985168	0.0067629
410	2013	C	0	0	沈阳市	0.0172996	0	4	4	71.43	1	52.82	5	77.4	5	76.9	0.045566	5.15867	-3.9027	-1.01316	0.0127744	0.00395568	9.56465	0.87255	8.486	0.0802	11.4975	2.83636	0.00388249	23.5189	0.833668	0.002329	0.01576	0.500359	-0.0820621	0.300883	0.127449	-0.052372	2.19722	0.3333	0	0.57881	1.07418	1	3.04452	0.586535	0.0011	0.091611	0.0082514
410	2014	C	0	0	沈阳市	0	0	4	4	71.15	1	56.19	4	73.95	5	76.9	0.046552	4.67909	-3.92063	-1.09025	0.00247658	0.00213029	9.54838	0.994041	8.625	0.0816	11.36	3.14656	0.00374222	23.7263	0.863882	0.001209	0.008081	0.427996	-0.0815591	0.289536	0.0949123	0.05907	2.19722	0.3333	0	0.317224	1.32811	1	3.09104	0.316362	0.0003	0.0798635	0.0093637
410	2015	C	1	0	沈阳市	0.00152755	0	4	4	71.75	1	54.4	4	74.82	5	78.54	0.020342	5.36691	-3.94853	-1.02379	#N/A	0.00195131	9.47807	1.17583	8.575	0.1051	11.3821	3.46682	0.00322514	23.8274	0.89864	-0.030157	-0.255871	0.300874	-0.128359	0.314818	0.0821429	-0.183116	2.19722	0.3333	0	0.321249	1.73249	1	3.13549	0.319629	0.0002	0.0811046	0.0240601
410	2016	C	1	1	沈阳市	0.00132897	0	2.75	1	57.91	1	54.4	3	66.44	1	53.94	2.6e-05	4.5708	-3.97482	-1.02268	#N/A	0.00161795	9.42424	1.35851	8.217	0.099	11.1108	4.83415	0.00403646	23.934	0.966771	-0.061053	-0.9324	0.265197	-0.0780569	0.345624	0.113821	-0.021947	2.19722	0.3333	0	0.324513	1.36646	1	3.17805	0.308069	0.0002	0.100356
410	2018	C	1	1	沈阳市	0.0021842	0	2.25	3	66.7	1	55.79	5	77.68	2	64.87	0.000435	4.38706	-4.07923	-1.03109	#N/A	0.00119278	9.02858	1.37486	8.753	0.0985	11.2354	5.13007	0.00287849	23.7384	0.992637	-0.041341	-1.47559	0.239929	-0.00279094	0.30136	0.167716	0.197089	1.94591	0.4286	0	0.315053	1.22196	1	3.2581	0.310712	0.0003	0.0793932
410	2023	C	1	1	沈阳市	0.0111253	0	4.5	5	75.28	3	70	6	80.91	5	75.85	0.494167	6.71428	-4.34686	-0.953765	0.0304377	0.00558324	7.88307	1.34849	10.563	0.0713	11.391	5.15691	0.0042989	21.8773	0.688403	0.008614	0.029754	0.443112	0.0466897	0.19234	0.218119	-0.101112	1.94591	0.4286	0	0.55691	4.42522	1	3.43399	0.615011	0	0.123942	0.0666492
411	2009	F	0	0	杭州市	0.00324072	0	4.75	5	76.83	1	55.34	9	100	5	78.41	0.472141	4.72347	-3.75076	-0.936462	0.224472	0.00252605	6.44254	0.826157	9.021	0.0889	11.0562	5.3852	0.00433845	21.3376	0.812174	0.038342	0.202297	3.05852	0.0232361	0.211877	0.0578984	0.238658	2.19722	0.3333	0	0.502819	1.60992	1	2.83321	0.61473	0.0024	0.0134102	0.100211
411	2010	F	0	0	杭州市	0.104769	0	5	5	76.01	1	57.33	9	95.12	5	77.72	0.603775	2.94829	-3.81316	-0.922653	0.235792	0.00836458	6.83948	0.844083	9.612	0.0935	11.1538	3.71066	0.00485041	21.6259	0.81415	0.040537	0.217126	3.07722	0.0369582	0.248726	0.0452794	0.307485	2.19722	0.3333	0	0.500698	1.67307	1	2.89037	0.60533	0.0024	0.013253	0.251621
411	2011	F	0	0	杭州市	0.151334	0	5	5	76.92	1	57.33	9	100	5	77.72	0.17413	4.81241	-3.87241	-0.935201	0.391267	0.00445387	7.35883	0.863409	9.666	0.1024	11.2957	4.93884	0.00497543	22.0259	0.750787	0.124928	0.55825	2.77503	-0.0219207	0.215052	0.0518519	0.284428	2.19722	0.3333	0	0.497916	1.29558	1	2.94444	0.5941	0.0024	0.0177459	0.26166
411	2012	F	0	0	杭州市	0.298919	0	5	5	75.52	1	51.55	9	100	5	77.72	0.253139	4.63209	-3.9153	-0.971515	0.158947	0.00561609	7.41337	0.923155	9.86	0.102	11.396	4.71875	0.00515096	22.1367	0.745088	0.036896	0.146286	2.71912	0.0168939	0.229547	0.0473795	0.242026	2.19722	0.3333	0	0.497916	1.16743	1	2.99573	0.6255	0	0.0170133	0.22385
411	2013	F	0	0	杭州市	0.0895061	0	4	4	74.18	1	51.46	9	95.12	5	77.03	0.266622	3.32455	-3.95758	-0.975686	0.156791	0.00493229	7.54009	0.960928	10.053	0.0936	11.6786	4.81195	0.00554442	22.2914	0.740446	0.037894	0.147212	2.77718	0.0157831	0.242621	0.0458557	0.168022	2.19722	0.3333	0	0.494331	1.19641	1	3.04452	0.680821	0	0.0185229	0.0128913
411	2015	F	0	0	杭州市	0.0757905	0	4.25	4	73.73	1	53.35	8	90.23	5	77.03	0.320937	2.81401	-4.03699	-0.980616	0.113027	0.0105659	7.6019	1.02539	10.492	0.1118	11.6283	5.11416	0.00697986	22.5356	0.752556	0.027153	0.10679	2.72871	0.0154019	0.261805	0.0433013	0.098952	2.19722	0.3333	0	0.496218	1.65276	1	3.13549	0.71024	0.0162	0.0170173	0.0146575
411	2016	F	0	1	杭州市	0.0994216	0	4	4	73.73	1	53.35	8	90.23	5	77.03	0.320742	2.96141	-4.07454	-0.987975	0.127504	0.0107806	7.59136	1.10297	10.43	0.1135	11.7303	5.1247	0.00662196	22.6673	0.757153	0.029267	0.119462	2.63227	0.0202556	0.246572	0.068068	0.115792	2.19722	0.3333	0	0.496218	1.41304	1	3.17805	0.711716	0.0227	0.0162895	0.0165037
411	2017	F	0	1	杭州市	0.110539	0	4	4	72.47	1	51.93	7	85.35	5	77.03	0.223639	2.88599	-4.10521	-0.97789	0.111717	0.0244666	7.79647	1.17102	10.56	0.1153	11.8139	5.06973	0.00732532	22.9297	0.790254	0.023826	0.106302	2.35304	0.0174448	0.240013	0.0613074	0.095612	2.07944	0.375	0	0.609734	1.24458	1	3.21888	0.691809	0.0198	0.0166446	0.0423191
411	2018	F	0	1	杭州市	0.122405	0	4.25	4	74.16	1	51.93	9	100	5	75.18	0.313959	3.03175	-4.14568	-1.06336	0.104367	0.0133862	7.78322	1.21379	10.802	0.1165	11.8507	5.52867	0.00875029	22.9197	0.768319	0.024769	0.112252	2.26734	0.0184947	0.246554	0.0592744	0.08382	2.19722	0.3333	0	0.612481	1.05987	1	3.2581	0.693134	0.0205	0.014926	0.0291398
411	2019	F	0	1	杭州市	0.167229	0	4	4	70.96	1	50.04	7	85.35	5	75.18	0.39553	2.85952	-4.176	-1.07906	0.121738	0.00716795	7.91571	1.29568	10.827	0.122	11.9347	5.52147	0.00963949	23.1	0.72408	0.034174	0.133602	2.48972	0.0204803	0.244005	0.0516418	0.200505	2.19722	0.3333	0	0.671645	1.00449	1	3.29584	0.684173	0.0139	0.0146764	0.0194833
411	2020	F	0	1	杭州市	0.198745	0	4.25	4	74.58	1	52.03	9	100	5	75.87	0.35803	3.05434	-4.21323	-1.07684	0.113444	0.0143361	7.9047	1.37175	11.137	0.1182	11.8249	6.27578	0.00896097	23.1437	0.715042	0.031137	0.11099	2.27144	0.0295319	0.230916	0.0479557	0.016555	2.07944	0.375	0	0.654369	1.11982	1	3.3322	0.653895	0.0139	0.0150971	0.0255904
411	2021	F	0	1	杭州市	0.145053	0	4	4	72.4	1	56.64	5	75.75	5	77.23	0.388758	2.84916	-4.24739	-1.06763	0.108835	0.00994413	7.93737	1.30413	11.456	0.1178	11.9174	6.29912	0.00992179	23.2284	0.712904	0.03372	0.117872	2.2754	0.0266243	0.236559	0.0651058	0.068888	2.07944	0.375	0	0.637995	1.01514	1	3.3673	0.637204	0.4554	0.0155343
411	2022	F	0	1	杭州市	0.180024	0	4	4	74.72	1	56.64	5	78.66	6	80.17	0.282247	3.77825	-4.28192	-1.09312	0.122427	0.0182734	7.93057	1.30108	11.784	0.114	11.9355	6.8868	0.0110774	23.3007	0.705025	0.036406	0.125032	2.4101	0.0297153	0.262918	0.0572609	0.14546	2.07944	0.375	0	0.630684	0.977683	1	3.4012	0.641072	0.539	0.0145464	0.0407623
411	2023	F	0	1	杭州市	0.19362	0	4	4	73.77	1	56.64	5	75.44	6	80.6	0.355463	2.99065	-4.31746	-1.09211	0.0987279	0.0150971	7.98071	1.36274	12.121	0.1141	11.99	7.17449	0.0121096	23.3558	0.656249	0.043494	0.135994	2.36805	0.0305786	0.256727	0.0528262	0.046796	2.3979	0.3636	0	0.746129	1.04743	1	3.43399	0.752238	0.2768	0.0136188	0.0125913
413	2009	C	0	0	石家庄市	0.000271544	0	2.75	3	69.98	1	57.45	1	57.74	6	84.63	0.429315	8.87249	-3.53092	-0.836839	#N/A	0.0556063	6.45834	0.840363	6.939	0.1441	10.3231	2.68206	0.00129052	19.7131	0.362231	-0.085091	-0.13185	0.161022	-0.0345535	0.188434	0.305173	-0.697712	1.94591	0.4286	0	0.504634	8.48637	0	2.89037	0.4901	0.0041	0.292028	0.0074965
413	2010	C	0	0	石家庄市	0.000139529	0	2.5	3	67.36	1	54.08	1	57.74	6	80.62	0.826533	6.15299	-3.57755	-0.82999	0.0173411	0.0674294	6.33683	0.833481	6.459	0.1205	10.4316	2.76032	0.00132375	19.7421	0.363774	0.011002	0.017272	0.212042	0.0276614	0.384265	0.262295	0.263007	1.94591	0.4286	0	0.3825	12.533	0	2.94444	0.413526	0.0032	0.205314	0.0117189
413	2011	C	0	0	石家庄市	0	0	2.5	3	65.59	1	54.3	1	53.04	5	79.82	0.326686	8.13756	-3.61708	-0.856565	0.0489961	0.0650874	6.37673	0.818101	6.406	0.1736	10.5946	2.54125	0.00154812	19.7401	0.305501	0.032405	0.048706	0.278845	-0.00491376	0.379517	0.141393	0.332753	1.94591	0.4286	0	0.40616	9.5483	0	2.99573	0.4304	0.0032	0.202653	0.0120688
413	2012	C	0	0	石家庄市	0.000804895	0	2.75	3	65.99	1	56.09	2	60.1	5	75.02	0.055218	8.13459	-3.92009	-1.13856	0.300141	0.00905269	7.5475	0.846525	6.622	0.1711	10.6817	2.58562	0.00166788	21.4468	0.755861	0.197903	0.631655	0.639567	-0.226508	0.0818336	0.0244349	6.45925	1.94591	0.4286	0	0.430237	2.65066	0	3.04452	0.435993	0.0032	0.0964825	0.0096704
413	2013	C	0	0	石家庄市	0.00949719	0	3.75	4	71.59	1	56.09	4	73.4	5	78.29	0.56839	0.893247	-3.98547	-0.979618	0.0749438	0.00324374	7.83637	0.889152	6.859	0.1367	10.7891	2.69752	0.00164619	22.9241	0.349694	0.073827	0.128433	0.16799	-0.20339	0.0330588	0.0156215	0.196378	1.94591	0.4286	0	0.52712	1.34125	0	3.09104	0.782125	0.0011	0.107585	0.0274029
413	2015	C	1	0	石家庄市	0.00234085	0	3.25	3	68.27	1	56.09	2	64.8	5	76.83	0.110862	-2.83277	-3.95393	-1.16181	0.0836526	0.00191668	8.52714	1.02247	7.592	0.1457	10.8404	2.74313	0.00166309	24.0836	0.49437	0.058897	0.116667	0.196681	0.061813	0.0756279	0.239601	1.16955	1.94591	0.4286	0	0.428871	1.37842	0	3.17805	0.537254	0.019	0.0907033	0.031147
413	2016	C	1	1	石家庄市	0	0	3.25	4	71.3	1	56.09	2	64.8	6	83.46	0.045562	-2.62275	-3.91277	-1.13871	0.043644	0.00397364	8.40313	1.05895	7.201	0.1524	10.9183	2.74199	0.00206318	24.5697	0.507345	0.034659	0.069652	0.182514	0.0296852	0.0574243	0.191182	0.484089	1.94591	0.4286	0	0.292883	1.42553	0	3.21888	0.48393	0.0046	0.0607035	0.0415623
413	2017	C	1	1	石家庄市	0.00490446	0	4.75	5	77.3	3	67.11	4	70.06	7	87.39	0.0346	-0.738291	-3.87773	-1.18498	0.0503857	0.0154379	8.97853	1.15298	7.637	0.1326	10.9512	3.33946	0.00162878	24.9381	0.526364	0.03287	0.06871	0.29391	0.0187014	0.0722559	0.163874	1.51204	1.79176	0.5	0	0.309885	1.22292	0	3.2581	0.427617	0.0039	0.0370365	0.0099573
413	2018	C	1	1	石家庄市	0.0128812	0	4.75	4	73.98	1	55.75	5	78.55	6	80.2	0.017951	0.905086	-3.9022	-1.16372	0.0591884	0.0155146	9.06021	1.25945	8.104	0.1269	10.9281	3.83391	0.00195179	25.0079	0.539472	0.032139	0.069179	0.399635	0.00534958	0.0483739	0.13275	0.627314	1.94591	0.4286	1	0.295032	0.903347	0	3.29584	0.368761	0.0039	0.0231634	0.0104111
413	2019	C	1	1	石家庄市	0.0200429	0	3.25	3	68.64	1	47.15	4	72.77	5	76.82	0.049372	2.78977	-3.95748	-1.07078	#N/A	0.0487466	8.51439	1.34887	8.493	0.1527	10.8754	4.52644	0.00212346	24.9392	0.534897	-0.022205	-0.047987	0.24981	-0.044461	0.0551739	0.140427	-0.378671	1.94591	0.4286	0	0.283739	0.833206	0	3.3322	0.321199	0.0025	0.03885	0.0087571
413	2020	C	1	1	石家庄市	0.00582529	0	2	1	52.61	1	58.84	3	67.79	1	39.19	0.034111	2.25508	-4.00711	-1.06356	#N/A	0.0220441	8.42442	1.33442	8.717	0.1679	10.8773	4.98122	0.00257476	24.895	0.558631	-0.052381	-0.115504	0.106324	0.0314874	0.0350475	0.146276	-0.597875	1.94591	0.4286	0	0.267416	0.802414	0	3.3673	0.272768	0	0.113256
413	2021	C	1	1	石家庄市	0.00530084	0	2.5	3	68.55	3	68.08	5	76.84	2	62.79	0.045911	2.48217	-4.055	-1.05964	#N/A	0.0308831	8.22094	1.22347	8.946	0.1585	10.9653	4.99058	0.00236732	24.8582	0.586016	-0.04496	-0.105063	0.088473	0.0210505	0.0296043	0.118115	-0.201001	1.94591	0.4286	0	0.267416	0.809699	0	3.4012	0.269835	0	0.1892
413	2022	C	1	1	石家庄市	0.0045481	0	3	3	66.8	3	68.08	4	73.11	2	61.58	0.015846	3.10817	-4.10849	-1.08295	#N/A	0.0330143	8.15536	1.32984	9.182	0.1767	11.0559	5.17345	0.00302081	24.7939	0.596684	-0.029653	-0.072533	0.097333	0.00434244	0.0297725	0.142798	0.046282	1.94591	0.4286	1	0.242079	0.777458	0	3.43399	0.247867	0	0.136677	0.0210946
415	2009	E	0	0	乌鲁木齐市	0.00683362	0	3	3	68.49	1	52.51	3	68.09	5	78.87	0.323512	4.28599	-3.69876	-0.817483	#N/A	0.131899	6.93342	0.91338	4.741	0.0714	10.5583	4.16809	0.00238305	20.8664	0.745751	-0.076102	-0.254931	0.226619	0.189363	0.205178	0.288858	0.0732	1.94591	0.4286	1	0.140223	3.06706	0	2.83321	0.1232	0.0182	0.157768	0.0384797
415	2011	L	0	0	乌鲁木齐市	1	0	3	3	68.34	1	50.86	3	66.91	6	80.33	0.155629	1.4243	-3.80948	-1.09355	0.0449888	0.00010074	3.73767	0.773065	3.538	0.1333	10.8714	3.92565	0.0017518	23.6473	0.541802	0.024316	0.047842	0.070764	0.043113	0	0.000165595	2.34312	2.19722	0.3333	0	0.672744	0.998287	0	2.94444	0.744515	0	0.0525843	0.0359316
415	2012	L	0	0	乌鲁木齐市	0.036416	0	2.25	2	61.81	1	55.51	1	56.34	3	69.36	0.07519	4.14243	-3.78788	-1.07921	0.070542	0.0032407	5.18739	0.866502	3.359	0.0625	10.9962	4.02403	0.00231104	24.1246	0.680917	0.022047	0.063173	0.08709	0.0394496	0	0.281592	1.33177	2.3979	0.2727	0	0.672744	0.985885	0	2.99573	0.718388	0.0015	0.0850258	0.0602544
415	2013	L	0	0	乌鲁木齐市	0.0872274	0	2.75	3	67.44	1	51.37	5	78.77	4	70.24	0.011267	3.12805	-3.71373	-1.16644	0.157889	0.00103303	6.22059	1.03055	3.58	0.0909	11.3357	4.33541	0.00310002	24.7685	0.853207	0.025405	0.113276	0.12145	0.0808699	1.53697e-05	0.445921	1.55895	2.19722	0.3333	0	0.672744	1.00993	0	3.04452	0.698108	0.0083	0.0809666	0.0749792
415	2014	L	0	0	乌鲁木齐市	0.238019	0	3.25	3	68.47	1	56.96	6	81.54	3	67.25	0.026846	2.75712	-3.71761	-1.13393	0.0863351	0.00127702	6.17794	1.05202	4.076	0.0909	11.1623	4.36174	0.0034401	24.9387	0.81397	0.018882	0.112339	0.109766	0.0699153	4.01502e-05	0.403033	0.074565	2.19722	0.3333	0	0.693093	1.12312	0	3.09104	0.750576	0.0059	0.0902173	0.0719345
415	2015	L	0	0	乌鲁木齐市	0.0213752	0	2.75	2	63.64	1	54.16	2	61.44	4	71.07	0.011347	0.005418	-3.59211	-1.09631	0.0581531	0.000449489	6.27288	1.29166	4.862	0.1569	11.2164	4.53787	0.00334844	25.6053	0.753311	0.017916	0.079237	0.096773	0.0531774	8.4609e-06	0.362893	0.409674	2.19722	0.3333	0	0.6228	0.996472	0	3.13549	0.673512	0.0045	0.091218	0.011849
415	2016	L	0	1	乌鲁木齐市	0.0248007	0	2.75	3	66.55	1	52.71	3	66.54	5	75.3	0.002856	2.18911	-3.48413	-1.20866	0.0719216	0.0164162	6.46147	1.36723	4.448	0.1	11.1543	5.16223	0.00385006	26.1015	0.825802	0.016304	0.080859	0.139198	0.0643699	8.94143e-06	0.541395	1.51139	2.19722	0.3333	1	0.566102	1.01507	0	3.17805	0.794997	0.0026	0.0505404	0.0137432
415	2017	L	0	1	乌鲁木齐市	0.0461226	0	3.75	4	71.69	1	53.09	6	82.92	5	76.14	0.00192	3.01803	-3.41506	-1.19113	0.0853554	0.000325029	6.68461	1.34561	5.293	0	11.2613	5.33079	0.00366302	26.4284	0.882109	0.012209	0.086291	0.139004	0.0699854	4.50075e-06	0.600205	0.481368	2.19722	0.3333	1	0.569609	1.00035	0	3.21888	0.807193	0.009	0.0550065	0.0159808
415	2018	L	0	1	乌鲁木齐市	0.0292318	0	4	4	73.11	1	57.26	6	84.3	5	75.85	0.002402	3.59843	-3.47225	-1.15106	0.0508176	0.00392545	6.70686	1.38714	5.32	0.2209	11.3759	4.97131	0.00329986	26.3786	0.807246	0.00909	0.058875	0.140873	0.0714959	3.43644e-05	0.636743	0.149059	2.19722	0.3333	0	0.56591	0.93412	0	3.2581	0.791055	0.0217	0.0466944	0.0052532
415	2019	L	0	1	乌鲁木齐市	0.0587593	0	3.5	2	64.43	2	60.78	6	80.58	1	56.21	0.010967	3.57536	-3.53729	-1.14867	0.0648334	0.00385684	6.48004	1.46955	5.448	0.0926	11.4796	4.88077	0.00295423	26.305	0.794467	0.012054	0.060599	0.140754	0.0748506	5.29718e-05	0.747623	-0.060255	2.19722	0.3333	0	0.52369	0.932873	0	3.29584	0.744118	0.0217	0.0475875	0.01056
415	2020	L	0	1	乌鲁木齐市	0.0769758	0	2.25	3	66.84	2	62.22	4	71.55	3	66.69	0.009939	3.76726	-3.59718	-1.12812	#N/A	0.000504755	6.41673	1.46924	5.784	0.0737	11.3183	5.47695	0.00291726	26.2456	0.833928	-0.033332	-0.178831	0.106322	0.0577377	8.78454e-06	0.751114	-0.293407	2.19722	0.3333	0	0.5007	0.938769	0	3.3322	0.720113	0.0217	0.0608969	0.0086309
415	2021	L	0	1	乌鲁木齐市	0.182411	0	3	3	68.45	2	60.62	4	71.66	3	67.81	0.017662	3.91018	-3.63981	-1.12276	#N/A	0.000454609	6.38856	1.21612	6.141	0.1068	11.4163	5.4384	0.00256238	26.2376	0.839347	-0.00453	-0.027727	0.107497	0.0648274	5.16777e-05	0.762778	-0.022872	2.19722	0.3333	0	0.5007	0.949434	0	3.3673	0.725383	0.0217	0.0567173	0.0094405
415	2022	L	0	1	乌鲁木齐市	0.857712	0	3.25	4	70.45	2	60.62	4	72.13	4	71.46	0.001712	4.14529	-3.6597	-1.14868	#N/A	0.000410227	6.38856	1.07611	6.521	0.1404	11.4675	5.7976	0.000847881	26.2979	0.83587	-0.009262	-0.057015	0.124725	0.0796996	0.00015871	0.761284	0.191529	2.19722	0.3333	0	0.5007	0.922725	0	3.4012	0.684379	0.018	0.0433053	0.0117051
415	2023	L	0	1	乌鲁木齐市	0.962436	0	3.75	4	71.22	2	60.62	4	74.17	4	71.42	0.014865	3.74261	-3.70239	-1.15805	0.0415396	0.000269227	6.35263	1.12492	6.923	0.0833	11.5335	5.92611	0.000745369	26.2899	0.825602	0.006928	0.040933	0.128239	0.0978854	0.000653605	0.779078	0.054915	2.19722	0.3333	0	0.458079	0.892054	0	3.43399	0.628072	0.018	0.0471326	0.0051034
416	2009	C	0	0	青岛市	0	0	4	4	72.38	1	59.69	1	54.4	8	90.97	0.638165	-0.435862	-3.6762	-0.90421	0.116601	0.0106168	4.39445	0.662384	8.469	0.1727	10.9552	2.30239	0.00210614	20.7026	0.241461	0.085443	0.109494	0.692855	0.0931054	0.0258564	0.150849	0.000902	2.19722	0.3333	0	0.277184	4.10319	0	2.83321	0.261876	0	0.0743054	0.0055134
416	2010	F	0	0	青岛市	0.0401988	0	4	4	71.27	1	59.69	1	52.27	8	90.04	0.738533	-0.945009	-3.71809	-0.877183	0.0402126	0.00574739	4.11087	0.720578	8.711	0.0621	11.0948	2.39057	0.00174276	20.7157	0.232765	0.029854	0.039132	0.718064	0.0569296	0.0274526	0.141079	0.125307	2.07944	0.375	0	0.278165	4.08496	0	2.89037	0.260441	0	0.0595402	0.0119504
416	2011	F	0	0	青岛市	0.516984	0	4	4	71.27	1	59.69	1	52.27	8	90.04	0.728788	0.247624	-3.74321	-0.86998	0.0713367	0.0104401	4.11087	0.771363	8.668	0.1006	11.2327	2.35598	0.00243704	20.6151	0.121643	0.055547	0.06774	0.726292	0.0646998	0.0210949	0.0653442	-0.030628	2.19722	0.3333	0	0.279257	3.09596	0	2.94444	0.257436	0	0.066306	0.0166254
416	2012	F	0	0	青岛市	0.42301	0	4	4	71.05	1	55.19	2	61.31	7	85.4	0.638468	-0.930749	-3.79353	-0.952409	0.0613138	0.00166178	3.97029	0.828842	8.908	0.1133	11.3227	2.38033	0.00236786	20.6842	0.118874	0.081271	0.092375	0.522554	0.0334556	0.0173883	0.0568135	-0.292239	2.19722	0.3333	0	0.279384	3.16559	0	2.99573	0.2571	0	0.0703517	0.0110435
416	2013	F	0	0	青岛市	0.254267	0	3.25	3	69.53	2	64.53	1	52.27	6	83.95	0.738468	-0.956715	-3.82943	-0.896058	0.0262998	0.0317534	5.8861	0.896464	9.233	0.195	11.5468	2.47674	0.00323914	20.6564	0.119955	0.022239	0.025255	0.508449	-0.00290504	0.0210875	0.0550926	-0.00717	2.19722	0.3333	0	0.281859	3.99704	0	3.04452	0.2748	0	0.0631837
416	2014	F	0	0	青岛市	0	0	3	3	68.39	2	62.28	4	74.86	3	66.8	0.845387	0.437041	-3.86946	-0.954163	0.0896503	0.00183829	4.07754	0.954892	9.477	0.0704	11.4775	2.42638	0.0031078	20.6566	0.0497812	0.101197	0.110106	0.436375	-0.147072	0	0.0486346	-0.108274	2.19722	0.3333	0	0.270922	4.73281	0	3.09104	0.269909	0.0177	0.107489
417	2009	F	0	0	合肥市	2.1413e-05	0	5	5	78.35	1	51.65	9	100	6	82.65	0.39793	0.785351	-3.79253	-1.04096	0.225344	0.0183643	8.84578	0.927765	7.476	0.0385	10.6345	3.43836	0.00419072	22.0299	0.645623	0.082082	0.23131	1.67328	0.183904	0.124333	0.273912	0.166876	2.19722	0.2222	0	0.47022	2.54263	1	2.83321	0.813025	0.0096	0.0690911	0.0245986
417	2010	F	0	0	合肥市	0.00246767	0	5	5	76.13	1	51.65	8	90.23	6	81.96	0.448259	-1.05441	-3.83681	-1.0209	0.239653	0.0137123	8.957	0.821332	7.676	0.0744	10.9114	3.24098	0.00664926	22.2214	0.630959	0.089902	0.248069	1.72925	0.189261	0.127097	0.217885	0.199865	2.3979	0.3636	1	0.472774	2.70758	1	2.89037	0.843584	0.0096	0.0657086	0.0189119
417	2011	F	0	0	合肥市	0.00123295	0	5	5	79.94	1	51.65	9	100	7	85.44	0.167818	-0.800755	-3.87689	-1.03149	0.2418	0.0218044	8.98218	0.760503	7.783	0.0722	10.7906	3.02844	0.00523423	22.5432	0.565579	0.109805	0.269828	1.60664	0.133726	0.107424	0.151449	0.210966	2.3979	0.3636	1	0.43725	1.69597	1	2.94444	0.74812	0.0089	0.0636018	0.0139065
417	2012	F	0	0	合肥市	0.000794608	0	5	5	76.52	1	51.65	8	90.23	6	82.65	0.224448	0.044442	-3.91559	-1.05597	0.141899	0.0226771	9.03551	0.765063	7.999	0.0695	10.9185	3.13372	0.00544432	22.6201	0.539711	0.071546	0.159753	1.41874	0.0998631	0.0932892	0.167665	0.064787	2.30259	0.4	1	0.41907	1.35697	1	2.99573	0.625352	0.0089	0.0703683	0.000691
417	2013	F	0	0	合肥市	0.000147561	0	5	5	78.91	1	59.31	9	95.12	6	81.96	0.170535	-1.41376	-3.95253	-1.05773	0.107103	0.016985	8.99974	0.799091	8.273	0.0716	11.0918	3.27153	0.00556752	22.7405	0.540901	0.066883	0.145505	1.39753	0.049935	0.0917918	0.135621	0.088354	2.3979	0.3636	0	0.414655	1.19096	1	3.04452	0.501317	0.0088	0.0760179	0.0053769
417	2014	F	0	0	合肥市	0.000141328	0	5	5	76.69	1	59.31	7	85.35	6	81.27	0.261531	-1.08236	-3.99069	-1.07069	0.0896853	0.0168907	9.01347	0.841524	8.839	0.0328	11.1227	3.34179	0.00560806	22.7964	0.532677	0.057688	0.124509	1.28944	0.0566303	0.103795	0.137951	0.006273	2.3979	0.3636	0	0.435653	1.34537	1	3.09104	0.530852	0.0065	0.0863174	0.0045389
417	2015	F	0	0	合肥市	0.000225287	0	5	5	77.14	1	57.42	8	90.23	6	81.27	0.278464	-0.01198	-4.02911	-1.05339	0.065413	0.020145	9.0216	0.979558	8.947	0.0517	11.1996	3.64019	0.00658389	22.8389	0.530825	0.04094	0.087428	1.20221	0.0352456	0.12322	0.159966	-0.020798	2.3979	0.3636	0	0.472331	1.55755	1	3.13549	0.538214	0.0065	0.0907086	0.0017207
417	2016	F	0	1	合肥市	0.000557135	0	5	5	77.14	1	57.42	8	90.23	6	81.27	0.248381	-0.154235	-4.06448	-1.06198	0.0629741	0.0161343	8.98469	1.06798	8.49	0.0558	11.2915	3.93689	0.0162087	22.9452	0.551745	0.04132	0.090188	1.11137	0.0712094	0.134651	0.151084	-0.002963	2.30259	0.4	0	0.503627	1.28096	1	3.17805	0.539917	0.0065	0.0897528	0.0033771
417	2017	F	0	1	合肥市	0.00119176	0	5	5	76.43	1	59.88	7	85.35	6	80.57	0.211006	-0.015638	-4.09978	-1.04714	0.0432345	0.00941091	9.13216	1.13654	8.738	0.0524	11.3903	3.81936	0.0099374	23.0354	0.572341	0.030631	0.070014	1.07545	0.0628075	0.141531	0.168826	0.067182	2.3979	0.3636	0	0.519076	1.19549	1	3.21888	0.583005	0	0.0907982	0.0098998
417	2018	F	0	1	合肥市	0.00101648	0	5	5	77.43	1	57.99	9	100	5	78.34	0.194462	-0.082171	-4.13746	-1.07303	0.0461721	0.0112126	9.16513	1.22591	8.859	0.0502	11.4873	3.70516	0.011757	23.0758	0.575794	0.030453	0.071502	1.03668	0.0659034	0.159798	0.205638	0.028107	2.3979	0.3636	0	0.540241	0.897159	1	3.2581	0.569855		0.0964098	0.0113112
417	2019	F	0	1	合肥市	0.00571285	0	4.25	4	73.74	1	57.99	8	90.23	5	75.05	0.256102	2.27127	-4.1757	-1.06758	0.040631	0.00929186	9.16545	1.2665	9.194	0.0671	11.6581	3.34374	0.0138508	23.1047	0.562743	0.023169	0.053778	1.02274	-0.0363682	0.168814	0.197775	0.021215	2.3979	0.3636	0	0.517189	0.918164	1	3.29584	0.539604		0.099493	0.0065906
417	2020	F	0	1	合肥市	0.0052258	0	4.5	5	75.22	1	57.99	8	90.23	5	77.66	0.206865	1.59732	-4.21395	-1.06101	0.0302995	0.00735005	9.08727	1.29203	9.528	0.0726	11.5938	3.58107	0.0162581	23.1326	0.564571	0.017248	0.03953	0.576833	0.0245525	0.216338	0.182153	-0.419745	2.19722	0.4444	0	0.542465	0.902535	1	3.3322	0.572374		0.159611	0.0137562
417	2021	F	0	1	合肥市	0.00785398	0	5	5	77.38	3	66.77	5	78.91	6	81.39	0.211536	0.900517	-4.24354	-1.0714	0.0413731	0.0063289	9.00773	1.27384	9.875	0.0773	11.7051	3.5171	0.015253	23.28	0.609406	0.020556	0.049971	0.527725	0.0750719	0.203197	0.146737	0.001272	2.19722	0.4444	0	0.478042	0.876295	1	3.3673	0.474847	0	0.164173	0.0089739
417	2022	F	0	1	合肥市	0.00968875	0	5	5	75.78	3	66.77	4	74.56	6	81.17	0.133576	1.91104	-4.28253	-1.08758	0.0344701	0.00445825	8.93722	1.28961	10.234	0.0669	11.7424	3.81564	0.0204504	23.293	0.601921	0.017557	0.044521	0.485603	0.0456116	0.199672	0.135096	-0.005665	2.07944	0.5	0	0.421857	0.927407	1	3.4012	0.431638	0	0.16624
417	2023	F	0	1	合肥市	0.00934432	0	5	5	76.06	3	66.77	5	76.46	6	80.33	0.249155	1.75533	-4.32201	-1.09197	0.0641367	0.00467428	8.84894	1.30789	10.606	0.0883	11.7759	4.13933	0.0194122	23.2997	0.575139	0.025684	0.062382	0.510126	0.0635259	0.194408	0.125622	0.061276	2.19722	0.4444	0	0.411326	0.871228	1	3.43399	0.40683	0	0.155102
419	2009	F	0	0	长沙市	0.00563716	0	5	5	78.19	1	59.31	9	100	5	79.11	0.451763	1.54197	-3.66193	-1.03213	0.0238147	0.00295243	8.24722	0.997758	6.869	0.0948	10.9441	2.81102	0.00287911	21.7748	0.717833	0.020846	0.063053	0.929519	0.159495	0.0849707	0.500582	0.327146	2.07944	0.375	1	0.506098	1.61884	1	2.63906	0.506611	0.0895	0.110509	0.126833
419	2010	F	0	0	长沙市	0.00832504	0	5.75	6	80.13	1	57.33	9	100	6	83.36	0.497063	1.99294	-3.70709	-0.939514	0.130612	0.0128785	8.53582	0.919219	7.159	0.0908	11.1041	2.81097	0.00293102	21.8825	0.718966	0.034212	0.121504	1.07638	0.102726	0.0830871	0.456575	0.354961	2.07944	0.375	1	0.493822	1.87909	1	2.70805	0.543239	0.0884	0.10484	0.100442
419	2011	F	0	0	长沙市	0.00710905	0	5.25	5	77.78	1	47.67	9	100	6	83.36	0.384687	1.16094	-3.75143	-0.999637	0.0810961	0.0298539	8.43533	0.85679	7.016	0.0807	11.2839	2.64233	0.00274503	21.9957	0.532363	0.063879	0.168274	1.10344	0.0806551	0.0933579	0.389874	0.145013	2.07944	0.375	1	0.51022	1.22258	1	2.77259	0.543603	0.089	0.105851	0.102577
419	2012	F	0	0	长沙市	0.00697059	0	3.75	2	62.27	1	47.67	6	80.46	2	62.54	0.379157	1.15788	-3.79264	-1.02991	0.061658	0.00243964	8.47303	0.877709	6.924	0.0878	11.4065	2.65607	0.00261657	22.0336	0.530868	0.042702	0.091166	1.0637	0.105538	0.0793149	0.354767	0.038179	2.19722	0.3333	1	0.498976	1.18617	1	2.83321	0.497535	0.0694	0.111252	0.0395092
419	2013	F	0	0	长沙市	0.0063974	0	3	4	72.11	2	61.21	8	90.23	4	70.83	0.301072	0.169013	-3.83347	-1.03117	0.0522866	0.00252689	8.35397	0.920143	7.417	0.0982	11.5889	2.71507	0.00282735	22.0622	0.520257	0.038631	0.081412	1.13367	0.0789586	0.106269	0.31783	0.101738	2.19722	0.3333	1	0.499373	1.30235	1	2.89037	0.4872	0.0694	0.105413	0.0260618
419	2014	F	0	0	长沙市	0	0	2.75	3	65.95	1	59.31	5	75.58	3	65.63	0.444789	0.243417	-3.87321	-1.03733	0.0450793	0.00841902	8.31972	0.962794	8.132	0.119	11.5869	2.74217	0.00286997	22.0529	0.487812	0.036305	0.073212	1.13116	0.0471931	0.114211	0.301276	0.00736	2.19722	0.3333	1	0.49859	1.45835	1	2.94444	0.494701	0.0694	0.0990995	0.0112159
419	2015	F	0	0	长沙市	0.017316	0	3.5	5	75.31	1	55.43	7	85.35	6	80.51	0.497723	0.603414	-3.91367	-0.957808	0.0595408	0.00271306	8.29729	1.03626	8.724	0.1101	11.6565	3.09007	0.00284051	22.0695	0.487041	0.029066	0.056705	1.09272	0.0395995	0.0902197	0.276882	-0.030409	2.19722	0.3333	1	0.489901	1.75966	1	2.99573	0.498042	0.0694	0.10667	0.0128682
419	2016	F	0	1	长沙市	0.0273441	0	4	4	73.19	1	51.65	7	85.35	5	78.41	0.507237	0.447198	-3.95456	-1.01811	0.0251337	0.00264684	8.33687	1.1587	8.18	0.1388	11.729	3.12855	0.00263027	22.1039	0.475139	0.029771	0.057361	0.965134	0.0223365	0.0825665	0.309904	-0.093825	2.19722	0.3333	1	0.493924	1.5531	1	3.04452	0.476295	0.0694	0.111347	0.0136787
419	2017	F	0	1	长沙市	0.0214713	0	4.75	5	75.83	1	52.21	8	90.23	6	81.2	0.538638	0.677303	-3.99554	0	0.07186	0.00614441	8.25842	1.2905	8.447	0.1315	11.7845	3.24062	0.00287185	22.1479	0.470669	0.036268	0.068801	0.964747	0.0620437	0.0715763	0.280821	0.03966	2.19722	0.3333	1	0.496947	1.26437	1	3.09104	0.475047	0.0694	0.110382	0.0194314
419	2018	F	0	1	长沙市	0.0164956	0	4.5	4	74.29	1	56.09	6	80.46	6	80.05	0.449616	0.08409	-4.03777	0	0.0280203	0.00382151	8.02976	1.39106	8.683	0.1198	11.8272	3.36209	0.00328872	22.3181	0.394411	0.037056	0.064931	0.828853	-0.00671557	0.0645826	0.223897	-0.040527	2.19722	0.3333	1	0.492749	0.844584	1	3.13549	0.476563	0.0694	0.117221	0.0189516
419	2019	F	0	1	长沙市	0.0148926	0	4.25	5	77.48	4	72.92	5	75.58	6	80.05	0.514298	1.48299	-4.07791	0	0.066854	0.00215445	7.93987	1.35344	8.75	0.1308	11.8485	3.61858	0.00425503	22.3529	0.374371	0.039887	0.064774	0.689103	-0.01389	0.0615241	0.205885	-0.082068	2.19722	0.3333	1	0.489961	0.861354	1	3.17805	0.477889	0.0694	0.115901	0.0080317
419	2020	F	0	1	长沙市	0.0109521	0	5	5	78.39	4	72.92	6	80.46	6	80.05	0.438647	0.520356	-4.11795	-1.02923	0.0373639	0.0172281	7.48043	1.33879	9.037	0.1179	11.7224	3.87937	0.00456643	22.3971	0.348544	0.039611	0.062006	0.410753	0.0128587	0.0402154	0.187625	-0.37987	2.19722	0.3333	1	0.491138	0.824701	1	3.21888	0.467655	0.0694	0.183168
419	2021	F	0	1	长沙市	0.0071766	0	5	5	76.08	3	68.09	5	78.34	5	78.21	0.434184	0.164221	-4.15757	-1.03378	0.022613	0.0119542	7.37713	1.31847	9.333	0.1216	11.781	3.91073	0.00518373	22.4802	0.424588	0.028885	0.04721	0.387233	0.0590868	0.029126	0.169267	0.005331	2.19722	0.3333	1	0.491676	0.854296	1	3.2581	0.469214	0.0542	0.140633
419	2022	F	0	1	长沙市	0.00857761	0	5	5	75.99	3	68.35	5	77.26	5	78.74	0.554001	1.46349	-4.19796	-1.04132	0.0257027	0.0061947	7.27586	1.39987	9.638	0.1164	11.8145	4.09933	0.00569442	22.378	0.359517	0.030019	0.049514	0.360111	0.00535035	0.033086	0.178589	-0.078472	2.19722	0.3333	1	0.499019	1.16574	1	3.29584	0.481149	0.0542	0.148187	0.009466
419	2023	F	0	1	长沙市	0.0122388	0	5	5	78.71	3	68.71	5	79.8	6	82.76	0.575031	0.933672	-4.23794	-0.987618	0.0454298	0.00498624	7.1869	1.41152	9.954	0.1242	11.8272	4.41626	0.00587284	22.4061	0.350627	0.028616	0.044366	0.3764	0.0471454	0.0322466	0.1423	0.005988	2.19722	0.4444	1	0.509873	0.918381	1	3.3322	0.49537	0.0493	0.131838	0.0258427
420	2009	C	0	0	吉林市	0.00100357	0	3.75	4	73.42	2	64.89	3	69.46	6	80.44	0.509692	4.02908	-3.77937	-0.95899	0.0101056	0.00938837	8.37332	1.21212	6.899	0.1	10.4511	1.20107	0.00195098	21.7279	0.63713	0.003856	0.009756	0.717674	0.0257668	0.162128	0.498772	0.033957	2.3979	0.3636	0	0.232901	1.34786	1	2.83321	0.233362	0.0075	0.0656143	0.0319429
420	2010	C	0	0	吉林市	0.000893764	0	4	4	70.93	1	57.45	3	66.47	6	80.82	0.374303	2.58637	-3.8229	-0.922017	#N/A	0.0065928	8.39525	1.20536	6.979	0.0435	10.6329	1.13868	0.00133092	21.7936	0.686778	-0.030706	-0.091053	0.826614	0.0574794	0.153452	0.513524	0.264955	2.19722	0.3333	0	0.284581	1.65434	1	2.89037	0.383215	0.0038	0.0599825	0.0617902
420	2011	C	0	0	吉林市	0.000605061	0	3.75	3	68.92	1	55.66	3	69.69	5	75.17	0.109167	5.5607	-3.86488	-0.922385	#N/A	0.0117484	8.3141	1.26128	6.795	0.0333	10.8379	1.05105	0.00112398	21.8338	0.801884	-0.104086	-0.408963	0.778582	0.00173037	0.137969	0.483077	-0.007209	2.3979	0.3636	0	0.250855	1.21807	1	2.94444	0.261114	0.0033	0.0765369	0.0462733
420	2013	C	0	0	吉林市	0.00176336	0	3.25	4	70.75	1	57.67	2	62.77	6	82.82	0.001084	4.71217	-3.95468	-0.94664	#N/A	0.00499324	8.81344	1.28929	7.336	0	11.0188	1.18532	0.00169374	22.1092	0.957023	-0.115604	-1.11221	0.374535	-0.0350189	0.103475	0.341868	-0.099772	2.3979	0.3636	0	0.246955	1.21459	1	3.04452	0.2236	0.0025	0.0946082	0.0496828
420	2014	C	0	0	吉林市	0	0	4	4	72.22	1	57.45	4	72.17	5	79.8	0.393563	3.34553	-3.98864	-0.940713	#N/A	0.0279603	8.21447	1.28559	7.323	0.0217	10.925	1.48891	0.00237901	21.9198	0.692103	-0.000481	-0.00295	0.283833	-0.0184515	0.0563711	0.473919	-0.256614	2.30259	0.4	0	0.358763	1.3587	1	3.09104	0.52653	0.0018	0.0962226	0.0102259
420	2015	C	1	0	吉林市	0	0	3.25	3	67.84	1	54.08	2	60.78	5	79.62	0.526429	3.53007	-4.01764	-0.945119	0.00257999	0.120459	8.23058	1.27929	7.618	0.0508	10.9345	1.7406	0.00145344	21.6979	0.632747	0.000837	0.002508	0.346433	-0.0620724	0.071981	0.476318	-0.000754	2.3979	0.3636	0	0.358763	1.75571	1	3.13549	0.511439	0.0018	0.0802402	0.0127964
420	2016	C	1	1	吉林市	0.0316388	0	3	3	67.42	1	52.29	2	60.1	6	80.08	0.494695	1.13733	-4.07722	-0.967311	0.00866874	0.0383888	8.29029	1.38297	7.661	0.1159	10.9651	1.95105	0.00110837	22.2538	0.417175	0.006366	0.012625	0.383592	-0.0248242	0.0494492	0.333389	0.345763	2.3979	0.3636	0	0.346994	1.34904	1	3.17805	0.497451	0.0013	0.0450345	0.0168239
420	2017	C	1	1	吉林市	0.0141006	0	3	3	68.56	1	50.31	2	62.45	6	82	0.290622	3.07037	-4.11687	-0.974705	0.0317018	0.00232081	8.44763	1.45946	8.358	0.0469	10.8729	2.07657	0.00170511	22.5446	0.550183	0.015818	0.031216	0.406973	0.00512354	0.0775985	0.448746	0.576043	2.3979	0.3636	0	0.346582	1.46275	1	3.21888	0.466606	0.0013	0.0265435	0.0189238
420	2018	C	1	1	吉林市	0.0146358	0	3.25	3	69.72	1	50.31	3	68.24	6	80.63	0.211314	2.81921	-4.15399	-0.98808	0.050668	0.00402219	8.57584	1.49119	8.262	0.0392	10.8865	2.16258	0.000909314	22.689	0.591152	0.021138	0.049404	0.384734	0.0248031	0.0668793	0.41322	0.165882	2.3979	0.3636	0	0.331598	1.09751	1	3.2581	0.428776	0.0233	0.0345439	0.0183379
420	2019	C	1	1	吉林市	0.0138702	0	3.75	4	71.4	1	50.31	4	73.4	6	80.81	0.303846	3.06077	-4.18824	-0.999493	0.0342376	0.00598997	8.61613	1.52478	7.481	0.1809	10.4439	3.59128	0.00124065	22.8608	0.643893	0.012799	0.033661	0.344531	0.00883811	0.0630202	0.564322	0.050017	2.3979	0.3636	0	0.481153	1.13705	1	3.29584	0.491508	0.0206	0.0353457	0.0327294
420	2020	C	1	1	吉林市	0.0122706	0	3.25	3	67.87	1	50.18	2	64.78	5	78.99	0.215787	3.25867	-4.22721	-0.994306	#N/A	0.0120998	8.59526	1.4776	7.756	0.1905	10.4798	3.92898	0.000853131	22.8852	0.641798	-0.02702	-0.075651	0.291228	0.0117386	0.0841205	0.521955	-0.070933	2.3979	0.3636	0	0.466372	1.07046	1	3.3322	0.454505	0.0196	0.0397599	0.0204147
420	2022	C	1	1	吉林市	0.00843617	0	3	3	68.58	2	62.75	3	68.65	5	75.34	0.093078	3.46517	-4.29744	-1.00244	#N/A	0.00557369	8.48818	1.54654	8.335	0.2017	10.6677	4.32864	0.000231752	23.076	0.588122	-0.008968	-0.023731	0.380536	0.0312443	0.0433584	0.552442	0.024995	2.3979	0.3636	0	0.303333	1.55012	1	3.4012	0.364284	0.008	0.0241506
420	2023	C	1	1	吉林市	0.00521657	0	3.5	3	68.87	2	62.28	4	71.75	4	74.59	0.252641	3.73188	-4.33647	-1.01644	0.00743195	0.00372049	8.4659	1.59244	8.641	0.2	10.7129	4.56622	0.000642487	23.0922	0.591733	0.003036	0.007405	0.352519	0.0227394	0.0631898	0.57585	0.018282	2.30259	0.4	0	0.301237	1.26124	1	3.43399	0.338975	0.0068	0.0266086
421	2009	O	0	0	南京市	0	0	3.75	4	71.54	1	47.08	4	70.18	6	84.02	0.527902	2.78849	-3.81851	-0.977047	0.0813045	0.0119997	8.0356	0.731813	9.242	0.0924	11.1192	4.71627	0.00326015	21.7127	0.635898	0.025995	0.07489	0.552573	0.124779	0.279486	0.335789	-0.110281	2.19722	0.3333	0	0.409629	1.3924	1	2.89037	0.440166	0.017	0.0521918	0.0162761
421	2010	O	0	0	南京市	0	0	1.75	1	57.69	1	43.79	2	60.36	2	62.75	0.520376	0.930413	-3.86395	-0.901415	0.0398636	0.0141527	8.35019	0.783441	10.261	0.0882	11.0672	4.48956	0.00321811	21.8145	0.636461	0.014645	0.040256	0.615008	0.150328	0.255454	0.298652	0.113433	2.07944	0.375	0	0.409555	1.30482	1	2.94444	0.4239	0.017	0.0369824	0.0121436
421	2011	O	0	0	南京市	0	0	2.5	3	66.81	1	45.15	5	77.12	4	71.05	0.40059	3.43277	-3.90303	-0.76037	0.0787701	0.0140151	8.37632	0.820381	10.428	0.0971	11.2419	4.0807	0.00391835	21.7961	0.621109	0.033369	0.089909	0.520275	0.0540712	0.365417	0.288483	-0.119153	2.19722	0.3333	0	0.408557	1.13715	1	2.99573	0.415021	0.017	0.0537751	0.0402127
421	2012	S	0	0	南京市	0	0	3	3	67.53	1	43.79	4	70.18	5	77.29	0.593525	2.20036	-3.93628	-1.0278	0.096201	0.0421553	8.20549	0.858531	10.597	0.1263	11.391	3.94995	0.00486032	21.6751	0.54628	0.039964	0.096522	0.638118	0.142942	0.355774	0.24229	0.145967	2.07944	0.375	0	0.408514	1.1748	1	3.04452	0.429722	0.017	0.0485396	0.0391997
421	2013	S	0	0	南京市	0	0	3	3	67.22	1	45.72	2	61.53	6	80.86	0.637346	1.24671	-3.97172	-0.993575	0.0674576	0.0663186	8.15507	0.917771	10.76	0.092	11.516	3.97438	0.00500795	21.6041	0.47894	0.038788	0.079778	0.665817	0.0790737	0.340163	0.241028	-0.053212	2.07944	0.375	0	0.408514	1.13188	1	3.09104	0.4138	0.017	0.0324924	0.0077506
421	2014	S	0	0	南京市	0	0	3.25	4	70.89	1	42.42	4	70.18	6	84.92	0.783269	-0.148346	-4.00868	-1.02805	0.109804	0.100371	8.1409	0.971832	10.733	0.1059	11.5857	4.05752	0.00506932	21.5601	0.387614	0.071172	0.125809	0.665657	0.126482	0.181078	0.201609	-0.056509	2.07944	0.375	1	0.410824	1.46743	1	3.13549	0.422208	0.0049	0.0441498	0.0256432
421	2015	D	0	0	南京市	0.134172	0	3.25	3	67.76	1	45.72	1	59.14	6	83.4	0.41849	1.43839	-4.07553	-1.10638	0.0945038	0.031269	8.76764	1.01678	10.578	0.1097	11.6799	4.53725	0.00535246	22.6228	0.474536	0.058419	0.111466	0.645673	-0.0154273	0.0782536	0.403231	1.53507	2.07944	0.375	1	0.585216	1.18459	1	3.17805	0.654793	0	0.0410581	0.0933581
421	2016	D	0	1	南京市	0.151721	0	3.75	4	72.21	1	45.72	5	75.95	6	82.65	0.411208	1.94977	-4.11435	-1.05514	0.069253	0.0252192	7.97728	1.09212	9.639	0.0908	11.754	4.6953	0.00505855	22.6752	0.491874	0.042117	0.081532	0.566505	-0.0194627	0.281011	0.38694	-0.024196	2.07944	0.375	0	0.587235	1.14713	1	3.21888	0.651368	0	0.0478651	0.091208
421	2017	D	0	1	南京市	0.149255	0	3.25	3	68.02	1	44.56	3	65.03	6	81	0.179793	-1.41384	-4.13513	-1.08068	0.0689268	0.00226145	7.96242	1.09141	9.656	0.105	11.8724	4.65409	0.00574423	23.1139	0.686656	0.027755	0.07122	0.401875	0.28606	0.205006	0.268151	-0.071596	2.19722	0.3333	0	0.577893	1.00879	1	3.2581	0.582267	0	0.0435641	0.104355
421	2018	D	0	1	南京市	0.133952	0	3	3	66.81	1	43.2	2	63.8	5	79.87	0.186773	1.66132	-4.17216	-1.0726	0.0561066	0.0660901	7.86978	1.1141	9.746	0.1008	11.9374	4.84719	0.00628249	23.1599	0.697497	0.021564	0.070058	0.313846	0.0821923	0.211039	0.276263	-0.028096	2.07944	0.375	0	0.575872	0.920862	1	3.29584	0.580591	0	0.0453716	0.0378707
421	2019	D	0	1	南京市	0.177961	0	3	3	65.87	1	44.56	2	60.92	5	78.98	0.304757	4.64198	-4.20807	-1.05734	0.0423148	0.0583292	8.13505	1.16881	11.494	0.0993	12.0178	4.92637	0.00695745	23.219	0.705187	0.015481	0.051855	0.305011	-0.074743	0.304037	0.269985	0.024456	2.19722	0.3333	0	0.575872	0.919042	1	3.3322	0.5757	0	0.0452717
421	2020	D	0	1	南京市	0.171518	0	3	3	69.26	1	47.29	3	67.79	6	80.63	0.347606	5.31345	-4.2547	-1.08805	0.168145	0.020738	8.0904	1.20182	11.934	0.102	11.9787	5.17278	0.00680669	23.1207	0.649452	0.051201	0.159349	0.591534	-0.171287	0.31331	0.302423	0.903233	2.19722	0.3333	0	0.573542	1.00257	1	3.3673	0.5743	0	0.0275599
421	2021	D	0	1	南京市	0.169125	0	3.75	4	71.71	2	63.14	4	73.5	5	79.34	0.243782	1.91373	-4.27586	-1.0502	0.0279039	0.0189207	8.0265	1.13884	12.39	0.1056	12.0698	5.27288	0.00661915	23.3748	0.712896	0.013329	0.042338	0.285151	0.0736637	0.36634	0.24392	-0.475309	2.19722	0.3333	0	0.581045	0.912456	1	3.4012	0.571505	0	0.0538833	0.113528
421	2022	D	0	1	南京市	0.171397	0	4	4	70.92	2	62.5	4	73.92	5	77.76	0.142932	4.61246	-4.30814	-1.10421	0.00731579	0.00309812	8.00637	1.13397	12.864	0.1029	12.0939	5.71175	0.00662669	23.4617	0.740399	0.00587	0.021521	0.479968	-0.0377783	0.412551	0.232285	0.981931	2.07944	0.375	0	0.565935	0.924054	1	3.43399	0.566221	0.1902	0.0306806	0.0292893
421	2023	D	0	1	南京市	0.144399	0	4	4	72.98	2	63.41	4	74.77	6	81.59	0.221634	1.36306	-4.34687	-1.0929	#N/A	0.00279408	7.95297	1.16389	13.356	0.105	12.1173	6.14661	0.00646568	23.4753	0.755579	-0.006653	-0.026406	0.297523	0.192837	0.396396	0.232258	-0.348755	2.07944	0.375	0	0.566557	1.01331	1	3.46574	0.591777	0.1643	0.0474988	0.0136516
422	2009	C	0	0	宜昌市	0	0	4.75	5	75.97	3	65.02	4	70.84	7	85.02	0.202739	3.96305	-3.79981	-1.09443	0.119829	0.0100812	8.03851	0.901215	7.561	0.0571	10.357	2.24907	0.00179914	23.3271	0.727806	0.036039	0.130805	0.704883	0.0568346	0.120578	0.560042	0.228574	2.30259	0.4	0	0.260403	1.58447	1	2.89037	0.735865	0.0078	0.0331441	0.0138038
422	2010	C	0	0	宜昌市	0	0	4	3	66.74	2	63.23	1	39.87	7	86.65	0.270904	2.55659	-3.80872	-1.0595	0.232652	0.0165272	8.09407	0.830571	7.606	0	10.5501	2.15422	0.00186917	23.6542	0.724969	0.063687	0.232568	0.715704	0.0244131	0.134485	0.480947	0.317824	2.3979	0.3636	0	0.225536	1.27022	1	2.94444	0.45067	0.0639	0.0342025	0.0131775
422	2011	C	0	0	宜昌市	0	0	3.5	4	72.03	3	65.02	1	56.41	7	86.14	0.051527	3.52529	-3.80433	-1.10176	0.21366	0.00934928	8.45105	0.789168	7.482	0.04	10.8719	1.375	0.00171562	24.0109	0.736392	0.055628	0.207324	0.780441	0.0738127	0.129085	0.417863	0.538755	2.3979	0.3636	0	0.25321	1.09382	1	2.99573	0.381037	0.0639	0.0276895	0.0143945
422	2012	C	0	0	宜昌市	0	0	4.25	4	71.25	4	72.08	1	47.08	7	87.13	0.052609	3.25957	-3.82965	-1.12514	0.213696	0.0174973	8.17948	0.785786	7.835	0.0313	11.0271	1.37554	0.00191304	24.1127	0.734845	0.052242	0.197571	0.685888	0.136359	0.132651	0.422037	0.089319	2.3979	0.3636	0	0.28942	1.06167	1	3.04452	0.460846	0.0438	0.0298709	0.0082365
422	2013	C	0	0	宜昌市	0	0	3.75	4	73.02	4	72.08	1	53.06	7	86.96	0.03358	2.86031	-3.84217	-1.11603	0.026329	0.00948231	9.65323	0.898844	8.325	0.0264	11.1627	1.45312	0.00223245	24.2887	0.788887	0.006167	0.026159	0.593199	0.0809431	0.108237	0.555406	-0.003701	2.30259	0.4	1	0.259404	0.949511	1	3.09104	0.277927	0.0246	0.0299134	0.0084369
422	2014	C	0	0	宜昌市	0	0	3.75	4	70.29	4	72.08	1	44.23	7	86.96	0.060234	2.51175	-3.87294	-1.12399	0.00940105	0.00563001	9.21393	0.940399	8.776	0.0233	11.2433	1.45289	0.00214181	24.3443	0.79884	0.002172	0.010545	0.499987	0.0978719	0.117001	0.506718	-0.056954	2.3979	0.3636	1	0.266797	0.979343	1	3.13549	0.31654	0.008	0.030651	0.102907
422	2015	C	1	0	宜昌市	0	0	2.75	2	60.17	1	50.44	1	50.98	4	71.33	0.032909	1.44125	-3.9014	-1.13971	0.00564169	0.0050576	9.1842	1.00701	8.87	0.0442	11.3189	1.4641	0.00405226	24.4116	0.798186	0.001402	0.00696	0.474116	0.120981	0.103785	0.486999	0.00855	2.3979	0.3636	1	0.292681	0.97269	1	3.17805	0.347463	0.008	0.0287292	0.103967
422	2016	C	1	1	宜昌市	0	0	2.25	3	67.23	1	54.21	2	63.69	5	76.25	0.016018	2.69544	-3.9423	-1.04755	#N/A	0.00362563	9.03539	1.06144	8.63	0.0944	11.4073	1.47827	0.00369026	24.4065	0.828879	-0.035314	-0.189353	0.380727	0.0616925	0.093865	0.519775	-0.172077	2.3979	0.3636	1	0.312795	1.00836	1	3.21888	0.480599	0.008	0.0388543	0.0245856
422	2017	C	1	1	宜昌市	0	0	1.5	1	55.21	2	61.84	1	43.41	1	59.79	0.000245	4.11183	-4.0154	-1.02031	#N/A	0.00641892	9.19736	1.14499	8.675	0.0609	11.4439	1.61754	0.00372294	24.2061	0.951838	-0.142459	-1.23124	0.330607	0.0373549	0.0603408	0.630366	-0.212522	2.19722	0.3333	0	0.230062	1.06453	1	3.2581	0.227879	0.008	0.129948	0.0387517
422	2021	C	1	1	宜昌市	0	0	3.25	3	67.17	2	61.2	4	73.94	3	69.56	0.179681	2.25184	-4.23653	-1.03495	0.372146	0.0322027	8.98695	1.35132	10.192	0.0779	11.7527	1.86699	0.00307904	23.7614	0.809812	0.096976	0.782846	0.864892	0.175337	0.0756263	0.40843	0.343315	2.07944	0.375	0	0.329629	1.72673	1	3.4012	0.251735	0.006	0.0250517	0.0439631
422	2022	C	1	1	宜昌市	0	0	3.25	4	70.53	2	61.2	5	75.55	5	78	0.085731	1.36246	-4.28339	-1.10705	0.433083	0.00137263	8.98005	1.41286	10.591	0.131	11.8533	1.96056	0.00419671	23.7022	0.653785	0.13468	0.506521	1.02201	0.196332	0.0674141	0.421774	0.116936	2.70805	0.5333	0	0.307303	1.32534	1	3.43399	0.247304	0.0074	0.0221023
422	2023	C	1	1	宜昌市	0	0	3.5	3	69.26	2	60.66	5	75.33	5	75.18	0.118133	1.59028	-4.31332	-1.10709	0.0570222	0.00106788	8.95725	1.50947	11.006	0.1339	11.8966	2.08853	0.00406581	23.7883	0.596116	0.039198	0.104169	0.829278	0.0758806	0.081713	0.364711	-0.177211	2.63906	0.5	0	0.359986	1.09536	1	3.46574	0.325549	0.0062	0.0275287
423	2009	C	0	0	聊城市	0.0393814	0	5	5	78.41	2	60.84	5	78.54	7	87.29	0.538489	-7.76345	-3.7861	-1.05619	0.0781045	0.00518233	8.37055	0.662384	8.469	0.1727	10.1128	1.33877	0.00119112	21.8601	0.210992	0.162503	0.208271	0.829998	0.260756	0.0650371	0.111587	0.233192	2.19722	0.3333	0	0.322905	4.82675	1	2.83321	0.615387	0.0487	0.0835525	0.0059172
423	2010	C	0	0	聊城市	0.0223312	0	4.5	5	76.3	1	50.66	6	81.46	7	85.91	0.348193	-0.051524	-3.83169	-1.00382	0.164463	0.00685977	8.59785	0.720578	8.711	0.0621	10.2564	1.3265	0.00127794	22.0036	0.2169	0.176485	0.224822	0.731876	0.176714	0.0538562	0.111068	0.185021	2.19722	0.3333	0	0.31379	9.50316	1	2.89037	0.69973	0.0486	0.0841225	0.0204949
423	2011	C	0	0	聊城市	0.075752	0	5.75	6	81.89	3	67.08	7	85.08	7	87.29	0.29771	1.43019	-3.87587	-1.02068	0.240643	0.00456197	8.64206	0.771363	8.668	0.1006	10.4033	1.25309	0.00111549	22.1646	0.177752	0.222457	0.276603	0.705221	0.16793	0.0736118	0.111467	0.11976	2.19722	0.3333	0	0.281103	6.82208	1	2.94444	0.667848	0.0484	0.0837239	0.025636
423	2012	C	0	0	聊城市	0.0743734	0	6	6	80.28	3	65.28	6	81.24	7	87.29	0.077796	-2.15452	-3.91796	-1.059	0.160342	0.0367597	8.73665	0.828842	8.908	0.1133	10.5071	1.35923	0.00149323	22.3958	0.190484	0.220595	0.270619	0.639881	0.161115	0.0752639	0.0980983	0.107736	2.19722	0.3333	0	0.283498	5.15157	1	2.99573	0.612664	0.0484	0.109262	0.0255305
423	2013	C	0	0	聊城市	0.0824242	0	6	6	80.62	2	62.13	6	83.59	7	88.06	0.3714	-4.35332	-3.95727	-1.06168	0.176269	0.0114072	8.64224	0.896464	9.233	0.195	10.5856	1.41408	0.00153846	22.5116	0.149746	0.215776	0.259639	0.710512	0.147012	0.0921462	0.107246	0.314204	2.19722	0.3333	0	0.290589	4.47529	1	3.04452	0.542463	0.0484	0.0893084	0.0148721
423	2014	C	1	0	聊城市	0.154732	0	5.25	5	78.12	3	67.08	5	77.31	6	84.3	0.275109	-5.03107	-3.99277	-1.06005	0.163956	0.00589031	8.52635	0.954892	9.477	0.0704	10.6568	1.56758	0.00146586	22.7328	0.192	0.204213	0.246992	0.596594	0.0880848	0.196289	0.177763	-0.001816	2.19722	0.3333	0	0.29453	3.45925	1	3.09104	0.423025	0.0543	0.0926693	0.0133195
423	2015	C	1	0	聊城市	0.220494	0	5	5	75.97	2	63.71	4	74.1	6	83.48	0.607382	-3.38612	-4.0276	-1.0886	0.186749	0.00448883	8.54032	1.03047	9.728	0.1091	10.7087	1.65849	0.000742411	22.8761	0.177256	0.203848	0.249845	0.678285	0.113557	0.200427	0.15834	0.359354	2.19722	0.3333	0	0.305811	4.14971	1	3.13549	0.41593	0.0317	0.0776531	0.0130533
423	2016	C	1	1	聊城市	0.185121	0	5	5	78.57	2	63.71	6	84.96	6	81.84	0.459571	-1.71398	-4.06059	-1.06523	0.177892	0.00650026	8.38731	1.10961	9.191	0.1403	10.7711	1.78896	0.000461321	23.0208	0.157136	0.199923	0.23985	0.680778	0.0627739	0.302944	0.142511	0.159179	2.19722	0.3333	0	0.327964	3.69757	1	3.17805	0.49896	0.0317	0.0780161	0.0108072
423	2017	C	1	1	聊城市	0.0733324	0	5.25	5	75.32	1	59.71	5	79.87	6	80.21	0.373243	-1.51752	-4.08662	0	0.172927	0.0047805	8.47991	1.16075	9.494	0.1551	10.8159	1.84985	0.000607788	23.239	0.202369	0.183108	0.223906	0.660438	0.141999	0.291445	0.138142	0.167039	2.19722	0.3333	0	0.390784	3.38682	1	3.21888	0.503752	0.0317	0.0784112	0.0213458
423	2018	C	1	1	聊城市	0.0686752	0	5.25	6	80.56	1	59.71	8	94.44	6	81.83	0.243894	-0.826685	-4.11769	0	0.144037	0.00382656	8.48384	1.24165	9.732	0.1429	10.8577	1.88265	0.00045277	23.353	0.183198	0.159004	0.196845	0.559195	0.0727507	0.242747	0.125022	-0.004615	2.19722	0.3333	0	0.439797	2.04788	1	3.2581	0.54588	0.0317	0.0494002	0.0142627
423	2019	C	1	1	聊城市	0.0610293	0	5.75	5	78.98	2	61.29	7	87.88	6	82.01	0.244049	1.86254	-4.17088	0	#N/A	0.00357352	8.50755	1.3223	10.104	0.1144	10.5222	2.87641	0.000923938	23.1789	0.139923	-0.0349	-0.041718	0.231834	-0.0961065	0.302194	0.185031	-0.596825	2.19722	0.3333	0	0.437728	2.12467	1	3.29584	0.578624	0.0317	0.0994337	0.0129582
423	2020	C	1	1	聊城市	0.0835129	0	5	5	75.84	2	62.74	7	86.03	5	75.65	0.318052	-0.846861	-4.21496	0	-0.0159324	0.00269896	8.41383	1.3697	10.468	0.1062	10.5694	3.1111	0.000883945	23.1166	0.107124	0.003617	0.004137	0.301021	0.0731354	0.226266	0.203176	0.152373	2.19722	0.3333	0	0.454787	2.41885	1	3.3322	0.604667	0.0062	0.115364	0.0110695
423	2021	C	1	1	聊城市	0.0642101	0	5	5	76.99	2	62.81	5	79.86	6	81.27	0.231389	-4.72574	-4.25103	-1.0744	0.000717727	0.00283074	8.33807	1.34041	10.845	0.1027	10.7029	3.01171	0.000692319	23.1767	0.140407	0.03888	0.044397	0.340949	0.240875	0.141542	0.17735	0.128921	2.07944	0.375	0	0.430061	2.88236	1	3.3673	0.540751	0.0001	0.0969494	0.0110408
423	2022	C	1	1	聊城市	0.06094	0	5	5	77.54	2	61.63	6	82.59	6	80.89	0.429276	-5.06266	-4.2851	-1.0881	0.000843636	0.00333129	8.2169	1.35171	11.236	0.0966	10.7578	3.22202	0.000349424	23.2595	0.18055	0.064241	0.076597	0.333216	0.169805	0.0980567	0.155393	0.0501	2.07944	0.375	0	0.426751	2.28789	1	3.4012	0.582352	0.0001	0.0957866
423	2023	C	1	1	聊城市	0.0599484	0	5.75	6	84.29	6	80.31	7	87.55	6	83.54	0.122925	-5.80515	-4.32107	-1.10748	0.000267428	0.00560993	8.21012	1.37754	11.64	0.1189	10.815	3.3945	0.000359569	23.3115	0.192822	0.088817	0.109225	0.363584	0.146805	0.0760886	0.13809	0.16662	2.19722	0.3333	0	0.476469	2.57973	1	3.43399	0.701894	0.0001	0.0800129
425	2009	C	0	0	徐州市	0.00185934	0	4.25	5	75.91	4	70.61	3	69.12	6	83.2	0.240153	-0.719265	-3.75048	-1.29028	0.476422	0.0158514	9.39864	0.731813	9.242	0.0924	10.1306	1.38283	0.00154939	23.4361	0.707521	0.128154	0.439429	1.54922	0.210994	0.232163	0.154799	5.17108	2.07944	0.375	1	0.633958	1.70144	1	2.83321	0.787757	0.0077	0.0572142	0.0626413
425	2010	C	0	0	徐州市	0.000212316	0	5	5	76.5	4	70.61	4	71.01	6	83.2	0.353355	-0.61541	-3.7348	-1.07394	0.301761	0.00910026	9.36726	0.783441	10.261	0.0882	10.4366	1.38288	0.00154422	23.9342	0.513903	0.146384	0.354518	1.2647	0.0191822	0.231014	0.0967203	0.218117	2.19722	0.3333	1	0.642454	1.64723	1	2.89037	0.82919	0.0025	0.0424932	0.0553118
425	2011	C	0	0	徐州市	0.00189425	0	5	5	76.35	3	67.79	4	72.66	6	83.2	0.117202	3.17357	-3.72515	-1.11021	0.232911	0.0174717	9.71746	0.820381	10.428	0.0971	10.6312	1.32779	0.00291487	24.2704	0.563431	0.112507	0.246725	1.09794	-0.0584716	0.193622	0.0740078	0.307654	2.19722	0.4444	1	0.617838	1.2047	1	2.94444	0.68679	0.0025	0.0398816	0.0575168
425	2012	C	0	0	徐州市	0.00232492	0	5	5	75.94	3	67.79	3	69.85	6	84.2	0.09181	4.72817	-3.71871	-1.12831	0.143397	0.0201114	9.62945	0.858531	10.597	0.1263	10.7553	1.34734	0.00313453	24.5379	0.613681	0.061589	0.150914	0.802584	-0.0765758	0.144058	0.129326	-0.025435	2.19722	0.4444	1	0.600868	1.13747	1	2.99573	0.68457	0.0025	0.0552719	0.0460237
425	2013	C	0	0	徐州市	0.00302808	0	4	4	70.89	2	62.63	1	58.9	6	83.2	0.126636	2.55278	-3.74378	-1.12261	0.0730365	0.0147854	9.02702	0.917771	10.76	0.092	10.883	1.40792	0.00326557	24.6171	0.598504	0.03271	0.083083	0.57042	-0.00780216	0.137364	0.12483	-0.159891	2.19722	0.4444	1	0.599688	0.918514	1	3.04452	0.654551	0.0025	0.0525519	0.0182948
425	2014	C	1	0	徐州市	0	0	3.5	3	69.35	1	54.03	2	62.45	6	81.82	0.112658	2.41784	-3.78475	-1.13003	0.0136017	0.0100076	8.93142	0.971832	10.733	0.1059	10.9622	1.41245	0.00352196	24.612	0.581602	0.008114	0.020171	0.46471	0.0151005	0.157917	0.167667	-0.136636	2.19722	0.4444	1	0.550152	1.25828	1	3.09104	0.623244	0.0023	0.0804425	0.007636
425	2015	C	1	0	徐州市	0.00591912	0	3.75	4	72.58	1	56.43	3	67.58	6	84.2	0.083317	1.99147	-3.8497	-1.06476	#N/A	0.0348214	9.58596	1.01678	10.578	0.1097	11.027	1.46938	0.00360722	24.4777	0.517557	-0.001369	-0.003054	0.363749	0.00252276	0.134591	0.141137	-0.285264	2.19722	0.4444	1	0.502361	1.22207	1	3.13549	0.551935	0.0021	0.0883381	0.0635321
425	2016	C	1	1	徐州市	0.00343017	0	4	4	71.48	2	62.29	3	65.23	6	80.38	0.067046	1.59928	-3.8844	-1.12572	0.00547261	0.0109457	9.50755	1.09212	9.639	0.0908	11.1101	1.56934	0.00357406	24.5069	0.534267	0.004994	0.010538	0.38948	0.0510571	0.151073	0.171612	0.014011	2.07944	0.375	1	0.507872	1.07272	1	3.17805	0.569752	0.0022	0.0889515	0.0593587
425	2017	C	1	1	徐州市	0.00430517	0	4	4	73.05	2	60.62	3	68.36	6	82.56	0.064308	1.28906	-3.90116	-1.1502	0.0321124	0.0117364	9.51929	1.09141	9.656	0.105	11.1912	1.60001	0.00326282	24.6307	0.516661	0.021948	0.046198	0.621483	0.0633596	0.188288	0.144508	0.724629	2.07944	0.5	0	0.489506	1.16823	1	3.21888	0.57258	0.0022	0.0743645	0.0065995
425	2018	C	1	1	徐州市	0.00523945	0	4	4	73.32	2	61.9	3	67.04	6	83.38	0.028152	0.369856	-3.89923	-1.15896	0.055143	0.00927596	9.56927	1.1141	9.746	0.1008	11.2505	1.77934	0.00376791	24.8382	0.504644	0.037032	0.075581	0.800037	0.0540199	0.166473	0.117207	0.524488	2.07944	0.5	0	0.513576	0.926571	1	3.2581	0.640774	0.0019	0.0176252	0.005626
425	2019	C	1	1	徐州市	0.00930144	0	4	4	73.75	2	61.14	4	70.75	6	82.2	0.046173	0.651593	-3.88783	-1.17353	0.104209	0.00759031	9.57838	1.16881	11.494	0.0993	11.3039	1.9507	0.00362047	25.0709	0.564685	0.052625	0.113942	0.854271	0.0664444	0.135745	0.0982794	0.332492	2.19722	0.4444	0	0.549257	1.10633	1	3.29584	0.668634	0.0055	0.0149185	0.0296133
425	2020	C	1	1	徐州市	0.0195891	0	4	4	74.23	3	66.9	3	69.18	6	81.38	0.037244	1.97429	-3.88683	-1.17023	0.0949203	0.00841019	9.62846	1.20182	11.934	0.102	11.2982	2.19864	0.00292755	25.2428	0.627759	0.044304	0.110465	0.874903	0.0303843	0.142278	0.0868446	0.249969	2.19722	0.4444	0	0.541998	1.07681	1	3.3322	0.621969	0.0055	0.013852	0.0538052
425	2021	C	1	1	徐州市	0.0292945	0	4.75	5	76.22	2	64.97	6	82.93	6	80.74	0.051227	1.67233	-3.8809	-1.10016	0.179153	0.00959891	9.6475	1.13884	12.39	0.1056	11.4035	2.2229	0.00309492	25.424	0.662188	0.055961	0.158319	0.835645	0.0733683	0.15294	0.0782467	0.140053	2.19722	0.4444	0	0.51622	1.08851	1	3.3673	0.566804	0.0019	0.0144782
425	2022	C	1	1	徐州市	0.0257309	0	4.25	4	73.63	2	60.33	6	82.24	5	78.58	0.009489	2.44051	-3.79023	-1.19366	-0.00356383	0.0109231	10.2204	1.13397	12.864	0.1029	11.4482	2.35191	0.00260138	25.8885	0.687839	0.025102	0.079945	0.548364	0.00904072	0.20047	0.108268	0.112532	2.19722	0.3333	0	0.410228	1.01228	1	3.4012	0.591404	0.0002	0.0243516
425	2023	C	1	1	徐州市	0.0238182	0	4	4	74.27	2	61.72	6	84.31	5	77.71	0.03006	3.03039	-3.85338	-1.19087	0.10021	0.0127875	10.2436	1.16389	13.356	0.105	11.4997	2.52565	0.00279496	25.8108	0.645131	0.031061	0.093378	0.550777	0.0220434	0.199873	0.138957	-0.010328	2.19722	0.3333	0	0.415582	1.02982	1	3.43399	0.63789	0.0628	0.0291427	0.0252047
426	2009	D	0	0	赤峰市	0	0	4	4	71.26	1	49.82	4	74.39	5	79.26	0.605133	3.35166	-3.70093	-0.910933	0.0704773	0.0683469	5.95842	#N/A	#N/A	0	9.95404	1.22244	0.000760772	21.2336	0.287939	0.038596	0.064999	0.160222	0.0236291	0.0177729	0.370193	-0.001923	2.19722	0.3333	1	0.506071	2.4741	0	2.77259	0.513592	0.0528	0.149029	0.0113247
426	2010	D	0	0	赤峰市	0	0	4	4	72.56	1	49.91	4	72.97	6	83.16	0.570357	2.0839	-3.73849	-0.911606	#N/A	0.0725811	5.95324	#N/A	#N/A	0.0769	10.129	1.23855	0.000733915	21.2093	0.302007	-0.031222	-0.044279	0.241702	0.042045	0.0188354	0.374208	0.227057	2.19722	0.3333	1	0.517184	2.83914	0	2.83321	0.582414	0.0528	0.116009	0.0081053
426	2011	B	0	0	赤峰市	0	0	3.25	3	67.66	1	48.7	3	69.41	5	75.5	0.353837	2.86701	-3.82644	-0.989088	0.111691	0.00180736	5.68358	#N/A	#N/A	0.5	10.3456	1.18925	0.000589152	21.8678	0.486809	0.07797	0.135313	0.160262	0.0320414	0.0581592	0.19021	-0.039838	2.19722	0.3333	0	0.507499	1.67742	0	2.89037	0.506383	0.004	0.1823	0.0409299
426	2012	B	0	0	赤峰市	0.000329576	0	1.75	1	47.26	1	51.24	1	15.36	3	69.03	0.284394	4.52916	-3.86885	-1.06337	0.0560681	0.00203304	5.70378	#N/A	#N/A	0	10.5012	1.19181	0.000740305	21.9249	0.487297	0.032738	0.063825	0.273569	0.0452536	0.0772004	0.402724	1.31571	2.19722	0.3333	0	0.510687	2.08496	0	2.94444	0.533099	0.004	0.142848	0.0463338
426	2013	B	0	0	赤峰市	0.000321861	0	1	1	50.19	1	52.38	1	18.44	4	72.71	0.402289	0.999427	-3.916	-1.03288	0.0141237	0.00124275	5.5835	#N/A	#N/A	0.4	10.5007	1.26226	0.000767842	22.172	0.358713	0.013178	0.02253	0.218083	0.00778877	0.062073	0.355377	-0.06512	2.19722	0.3333	0	0.598519	1.31543	0	2.99573	0.601193	0.0032	0.2026	0.0619749
426	2014	B	0	0	赤峰市	0.000310001	0	1	1	49.95	1	51.15	1	13	5	76.81	0.586336	2.51266	-3.95428	-1.04452	0.0559564	0.00089725	5.49306	#N/A	#N/A	0.08	10.6288	1.35773	0.000990457	22.0927	0.299452	0.036537	0.057492	0.268202	-0.0494659	0.0711695	0.357196	0.402081	2.19722	0.3333	0	0.598519	1.8588	0	3.04452	0.613501	0.0233	0.136742	0.0219912
426	2016	B	0	1	赤峰市	0.000237039	0	1	1	43.99	1	47.36	1	14.9	2	63.97	0.222233	1.49727	-4.02161	-1.07535	0.0107648	0.000832574	5.77765	#N/A	#N/A	0.05	10.713	1.66767	0.000720227	23.0018	0.501488	0.010942	0.023429	0.106188	0.0201152	0.0244436	0.149466	0.043384	2.19722	0.3333	0	0.610018	1.69474	0	3.13549	0.564106	0.0115	0.232129	0.051889
426	2017	B	0	1	赤峰市	0.000236318	1	1	1	57.32	1	46.12	1	43.62	4	72.88	0.296251	1.59412	-4.06392	-1.10469	0.106271	0.000810644	5.75257	#N/A	#N/A	0.0952	10.606	2.19102	0.000700636	22.9566	0.423948	0.057982	0.108093	0.221161	0.125053	0.021266	0.356468	1.43897	2.19722	0.3333	0	0.563398	1.85514	0	3.17805	0.564494	3.5784	0.106535	0.0549019
426	2018	B	0	1	赤峰市	0.000913552	1	1	1	55.53	1	31.08	2	60.58	2	63.55	0.172427	1.74188	-4.10598	-1.00291	#N/A	0.0158881	5.93489	#N/A	#N/A	0.1739	10.4862	2.69636	0.00123142	22.9131	0.427777	-0.018685	-0.032542	0.26707	0.128455	0.0293513	0.32038	0.155136	2.19722	0.3333	0	0.562621	1.33417	0	3.21888	0.526524	3.5784	0.0977204	0.0461959
426	2019	B	0	1	赤峰市	0.000852263	1	1	1	41.19	1	42.02	1	29.9	1	49.17	0.270855	2.30474	-4.14425	-0.983198	0.0193833	0.0279044	5.80513	#N/A	#N/A	0.0263	10.5838	2.59345	0.00103612	22.95	0.420149	0.011229	0.019491	0.095992	0.0477492	0.0152029	0.314394	-0.641795	2.19722	0.3333	0	0.553534	1.32225	0	3.2581	0.512185	3.6394	0.2951	0.0301672
426	2020	B	0	1	赤峰市	0.00130451	1	1	1	49.38	1	49.65	1	46.8	1	51.17	0.245036	2.56103	-4.18401	-1.0324	#N/A	0.00692101	6.31716	#N/A	#N/A	0.0784	10.6827	2.70041	0.000891832	22.9549	0.446472	-0.019787	-0.034919	0.101181	0.0448075	0.043953	0.370431	0.076175	2.19722	0.3333	0	0.529574	1.79714	0	3.29584	0.501325	3.6351	0.276086	0.036988
426	2021	B	0	1	赤峰市	0.00156022	1	1.75	2	62.41	1	59.42	3	65.53	2	63.83	0.313936	2.05793	-4.22537	-1.02227	0.0481024	0.00393383	6.51175	#N/A	#N/A	0.069	10.801	2.68216	0.0013402	22.9264	0.406827	0.026836	0.046828	0.218717	0.0759965	0.0358303	0.383417	1.13654	2.19722	0.3333	0	0.485556	1.70346	0	3.3322	0.500433	0.0316	0.17015	0.0383495
426	2022	B	0	1	赤峰市	0.0016473	1	2	2	62.84	1	59.42	2	64.9	3	65.61	0.136631	2.15057	-4.26236	-1.05636	0.0263506	0.00384875	6.92756	#N/A	#N/A	0.0909	10.8889	2.7226	0.00125047	22.9875	0.422657	0.01862	0.031828	0.223357	0.0807068	0.0429488	0.418873	0.038373	2.19722	0.3333	0	0.487621	1.46986	0	3.3673	0.511102	0.0261	0.123833
426	2023	B	0	1	赤峰市	0.00178783	1	2.75	3	66.42	1	59.42	5	77.3	3	67.05	0.259251	0.431084	-4.29419	-1.12318	0.169254	0.00377461	7.12769	#N/A	#N/A	0.058	10.9177	3.01042	0.00152247	23.1287	0.405791	0.092061	0.157028	0.35788	0.157861	0.0249339	0.395353	0.776703	2.19722	0.3333	0	0.458683	1.73275	0	3.4012	0.57777	0.029	0.0855981
428	2009	H	0	0	长沙市	0.00352356	0	3	3	69.83	1	43.71	6	83.65	4	74.84	0.466697	2.47961	-4.11414	-1.03848	0.108927	0.0318602	7.05876	0.997758	6.869	0.0948	10.9441	2.81102	0.00287911	22.0874	0.626921	0.042666	0.108059	0.351025	0.148225	0.0560422	0.588175	0.409586	2.19722	0.3333	0	0.494828	1.46747	1	2.70805	0.506616	0	0.291896	0.0116546
428	2010	H	0	0	长沙市	0.00178046	0	4	4	73.59	1	48.03	9	100	4	74.84	0.484549	2.2829	-4.15706	-0.94564	0.101752	0.0244085	8.95261	0.919219	7.159	0.0908	11.1041	2.81097	0.00293102	22.2406	0.65925	0.033875	0.09537	0.324278	0.0945249	0.0631023	0.485149	0.081149	2.19722	0.3333	0	0.495666	1.74771	1	2.77259	0.507339	0	0.305195	0.0081707
428	2011	H	0	0	长沙市	0.00173441	0	4.5	5	75.39	1	45.69	9	100	5	78.58	0.177464	3.9457	-4.19787	-0.977876	0.083471	0.0131129	9.11107	0.85679	7.016	0.0807	11.2839	2.64233	0.00274503	22.4311	0.68591	0.026496	0.081237	0.310622	0.0906542	0.11661	0.453423	0.139307	2.19722	0.5556	0	0.486465	1.22411	1	2.83321	0.487202	0	0.306631	0.0018269
428	2012	H	0	0	长沙市	0.000550197	0	5	5	75.87	1	45.87	9	100	5	79.29	0.117835	4.37444	-4.23544	-1.0485	0.0556387	0.00998685	9.09223	0.877709	6.924	0.0878	11.4065	2.65607	0.00261657	22.6272	0.731865	0.018917	0.06399	0.267312	0.0599407	0.116159	0.503094	0.051183	2.07944	0.5	0	0.485274	1.18173	1	2.89037	0.488945	0	0.376894	0.0118684
428	2013	H	0	0	长沙市	0.00203882	0	4.25	4	73.02	1	45.87	6	83.65	5	79.29	0.085779	3.96551	-4.27029	-1.0699	0.0550327	0.0133399	8.87975	0.920143	7.417	0.0982	11.5889	2.71507	0.00282735	22.8078	0.76369	0.015093	0.060184	0.24145	0.0266352	0.248018	0.407607	0.082586	2.19722	0.5556	0	0.485187	1.31351	1	2.94444	0.476059	0.0346	0.374754	0.0248937
428	2014	H	0	0	长沙市	0	0	3.75	3	67.59	1	45.87	4	72.75	4	73.55	0.127784	3.87801	-4.30445	-1.00391	#N/A	0.0223628	8.73986	0.962794	8.132	0.119	11.5869	2.74217	0.00286997	22.9458	0.80305	-0.011045	-0.050984	0.174287	0.0125288	0.243875	0.400547	-0.149701	2.07944	0.5	0	0.480018	1.25628	1	2.99573	0.496889	0.0303	0.418307	0.0320693
428	2015	H	0	0	长沙市	0.00148422	0	3.25	3	67.2	1	48.03	4	72.75	4	72.18	0.216589	2.52779	-4.3429	-0.959799	#N/A	0.0246129	8.57508	1.03626	8.724	0.1101	11.6565	3.09007	0.00284051	22.977	0.642123	-0.003732	-0.013391	0.127395	0.0192446	0.231792	0.360364	-0.211163	2.07944	0.5	0	0.657304	1.52114	1	3.04452	0.695124	0.0169	0.522637	0.025763
428	2016	H	0	1	长沙市	0.00187414	0	3	3	69.17	1	43.71	4	72.75	5	76.85	0.210641	3.06505	-4.38611	-0.917047	#N/A	0.0225629	8.57979	1.1587	8.18	0.1388	11.729	3.12855	0.00263027	22.9103	0.666576	-0.047504	-0.137273	0.108915	0.011545	0.239587	0.416694	-0.159735	2.19722	0.5556	0	0.680145	1.35055	1	3.09104	0.725426	0.0169	0.592806	0.0151507
428	2017	H	0	1	长沙市	0.00143923	0	3.75	4	73.26	1	44.29	7	89.1	5	78.67	0.248854	3.20677	-4.4255	-0.957353	#N/A	0.0351442	8.55584	1.2905	8.447	0.1315	11.7845	3.24062	0.00287185	22.9235	0.676985	-0.007883	-0.02402	0.11854	0.0206686	0.199021	0.384458	0.059095	2.19722	0.5556	0	0.632479	1.10496	1	3.13549	0.624935	0.0054	0.570941	0.0137453
428	2018	H	0	1	长沙市	0.00198559	0	4	4	71.98	1	44.29	6	83.65	5	78.13	0.287485	3.70374	-4.47379	-0.986312	#N/A	0.0619371	8.48011	1.39106	8.683	0.1198	11.8272	3.36209	0.00328872	22.6969	0.658974	-0.086081	-0.26006	0.118112	0.019057	0.123997	0.457173	-0.098735	2.19722	0.5556	1	0.636611	1.01011	1	3.17805	0.623419	0.0054	0.602688	0.0155665
428	2019	H	0	1	长沙市	0.0022018	0	3.75	4	70.95	1	44.29	5	78.2	5	78	0.42353	3.06322	-4.51588	-0.999983	0.000836699	0.0932608	8.40066	1.35344	8.75	0.1308	11.8485	3.61858	0.00425503	22.6054	0.626011	0.000298	0.000837	0.16137	0.0595664	0.124767	0.454975	0.159084	2.19722	0.5556	0	0.622476	1.03248	1	3.21888	0.597739	0.0045	0.481241	0.0403087
428	2020	H	0	1	长沙市	0.00295994	0	4	4	73.51	1	48.48	5	78.2	6	80.73	0.258331	4.31327	-4.55699	-1.01142	#N/A	0.0546219	8.25453	1.33879	9.037	0.1179	11.7224	3.87937	0.00456643	22.5352	0.699642	-0.093918	-0.277483	0.081224	-0.0100108	0.13351	0.486432	-0.535926	1.94591	0.5714	0	0.583155	1.13898	1	3.2581	0.558353	0.0037	0.563407	0.0296029
428	2021	H	0	1	长沙市	0.00417836	0	3.25	3	67.53	1	58.06	4	70.73	3	69.96	0.328492	3.94565	-4.59777	-0.9745	0.00397456	0.0264816	8.11791	1.31847	9.333	0.1216	11.781	3.91073	0.00518373	22.451	0.681896	0.001206	0.003906	0.101126	0.00582909	0.141625	0.429615	0.152841	2.07944	0.5	0	0.580652	1.25217	1	3.29584	0.561122	0	0.435983	0.0250942
[truncated: 42,856 more rows]
[truncated: 5 more columns]

## Sheet: 控制变量
Size	ln(资产总计)
Lev	负债合计/资产总计
ROA	总资产净利润率
ROE	净资产收益率
ATO	营业收入/平均资产总额
Cashflow	经营活动产生的现金流量净额除以总资产
INV	存货净额与总资产的比值
FIXED	固定资产净额与总资产比值
Growth	本年营业收入/上一年营业收入-1
Board	董事会人数取自然对数
Indep	独立董事除以董事人数
Dual	董事长与总经理是同一个人为l，否则为0
[truncated: 8 more rows]

## Sheet: 地级市
所属地级市
[truncated: 62 more rows]
